# Supplementary material for: CoCoNuTs are a diverse subclass of Type IV restriction systems predicted to target RNA
Source: eLife. 2024 May 13;13:RP94800. doi: 10.7554/eLife.94800 (PMC11090510; doi:10.7554/eLife.94800)
Supplement: Supplementary file 3. [file elife-94800-supp3.xlsx]

## Sheet: Type I-A CoCoNuT
Phylum/Class	Species	Genome accessions	(CSD)-CoCo-McrB (CnuB) locus tags	(CSD)-CoCo-McrB (CnuB) IDs	(CSD)-CoCo-McrB (CnuB) sequences	IG-McrC_N-CoCo-CSD-CoCo-PD-DxK-ZnR (CnuC) locus tags	IG-McrC_N-CoCo-CSD-CoCo-PD-DxK-ZnR (CnuC) IDs	IG-McrC_N-CoCo-CSD-CoCo-PD-DxK-ZnR (CnuC) sequences	Species	Phylum/Class
Verrucomicrobiota	Spartobacteria bacterium	RZYC01000072.1	EOL87_13790	gb|NCD34471.1|	MREKKTFMSENTSNTLKLNQENADLSHHKVEPIYKDQAHYLSVAQRLELFLSFNNMDEPIAYGIISVAKNGFSPVPYWVNDLKNKHGSYIYYPVIGDRSRPSIALRKLPVNSRLGDMVSLQFRLASDKSEVFQKKPFAIHANTDDMTVVDIIPKQFAVFQGDNIVLPKSLLAYSESLISQDVELLKEKINRDKELHEKAIKNQAEELKKHYEQNSSHHREEYKILLNTITELKMEKSELEMTVASRMGVAFDLDDFIRDAERKKELLMSEYNRLREYAKQSSNRLMRFDLITEQQNKLFSGETVLQEQDGEALEWFADLQGDYRRLVNVIQAYLFRTGIIYPRMIIANFLTLLRTNDIIILSGLSGAGKTQLVRSFARALCGVAHIIPVKPNWTGSEDL…	EOL87_13795	gb|NCD34472.1|	MADWQLFMIHVSWRERNVVSDVSEGYFPVEAVFDASRNRYEAAMQAYAEGNERLAIKTARACSVDDGRGNWIPLAEYHNEETGEKWWFEQGKWNKQSKYHDAPSFHRPGCSMRLKIGADICIINLFTPALDQQDFNKLLSDIENWCWEMAVDDQCYVTHEMEQEQSIKTGSLSPVFLQCVSNFIKSADAVLKRPQAELRECVELQKLERLRPNSHSMRYLAQCGERPSVPGRSVENHFNIPENRFVCGMVKYVMRILRSMRNFSDDIPLRLENAAKEYEQRVEDLKNTTHYKIDQEQLERDISEIKTKRAELLEVCNIPGAHVYAVIKVRSGAVLPFELIPQYRCGYSKLWATALDNDRAKIIQFENKGKLLLIASIANLTKVEDPRNGDYWRCDISRV…	Spartobacteria bacterium	Verrucomicrobiota
Alphaproteobacteria	Agrobacterium tumefaciens	SGOE01000006.1	EXN61_19380	gi|1703356693|gb|TRB04496.1|	MRPLADLPAEWQVAVSGSEAVRRISALARREIENHVRNVVLQEDEELARRHADNVETLSRLDADRRQAQDDARAARAKIEADLAKHRQRRDEAERSAADLQVQLGIEQERFAAYKSTVAQEKQLMEINYRRLTDLLTEKGNRLVALGLADAEDVAALIPEMTGPEDERSGVGFTDALAGDYARLAPLLQSRLAETGLLYSQAQLRDFLALLRTRDLIVLAGDSGSGKTSLVRAAAAAIGGVCTVIPVKPNWTGPEDLLGYYNPIERSYQATPFLLALQAASRSPHVPHFICLDEMNLARVEHYFADFLSLLESRSTSPEIHLYTADEERHVVVEQGIFLAVDAEARRRTGLPDTATLEEILRHDQANAELHRLGGLADNESVLVHHTRLRRSLAAQLRM…	EXN61_19385	gi|1703356519|gb|TRB04322.1|	MGVLAHYLDIEWQAPGVARRVEVSTYPIEIEIAPDGTLHAEVSIFRDFAPWVGLQLAGALAGVEPCTVNAENERLPWLQVSDGNDRTWWIPETGWSKAGNKHVSEMHRSFGSFSVELGSRQRLVLDAVALELDRAHAQEYLDDFRDELIWLAIGRPTGALGEVGSDNSRDLLDALKGFTDAASRVLEHPAREIREVTGVVATARVRPNSETFRAVMRRPGARSYPGRTAQESADIPENRYLRGLVEHCRRLARSLARSSGHHQAHLAARAAREKSRAADLLAVERVEVDPEIFDNQLSDIRKRLDAIATWSGSSVAPGPGERLYRFTVGKEFKEDRGSAKEFFYRNPDRDDRYDQREGINFSVARLPDDLHDLVIAASRFDKDICLDLTGNAVITTFRT…	Agrobacterium tumefaciens	Alphaproteobacteria
Alphaproteobacteria	Rhizobium laguerreae	WIFH01000032.1	GFL43_34095	gb|NKN09827.1|	MRPLADLPAEWQVAVSGSEAVRRISALARHEIENHVRKVVLEENEELARRHADNIETLSRLDADRRQAHDDARAAGAKIEADLAKHRQRRDEAERSAADLQVQLGIEQERFAAYKSSAEQEKQLMEINYRRLTDLLTQKGNRLVALGLADAEDVSALIPEITGRGDERSGVGFTDALAGDYARLAPLLQSRLAEVGLLYSLAQLRDFLALLRTRDLIVLAGDSGSGKTSLVRAAAAAIGGVCTVIPVKPNWTGPEDLLGYYNPIERSYQATPFLLALQAAVRSPQVPHFICLDEMNLARVEYYFADFLSLLESRSTSPEIHLYTADEERHVVVEQGIFLAVDAEVRRRTGLPDTATLEDILRHDQANAELHRLGGLADNESVLVHHARLRRSLAAQMRM…	GFL43_34090	gb|NKN09826.1|	MDVLAHYLEIEWQAPGVARRVEVSTYPIEIEISPDGRLSAEISIFRDFAPWVGLQLAGALAGVEPCTINAENERLPWLQVSDGKDRTWWIPETGWSKAGNKHVSEMHRSFGSFSVELGPRQKLVLDAVALELDRAHAQEYLDDFTDELVWLAIGRPSGALGEVGSDNSRDLLDALKGFTDAASRVLEHPAREIREVTGVVATARVRPNSETFRAVMRRPGARSYPGRTAQESADIPENRYLRGLVEHCRRLARSLTRSSAHHQAHLAARATREKSRAANLLAVERVEVDPEIFDNQLSDMRKRLDAIATWAGSSVAPEPGERQYRFTVGKEFKGDGGAAKEFFYRNPDRDDRYDEREGINFSVARLPEDLHDLVIAASRFDKDIRLDLMGNAVITTFRT…	Rhizobium laguerreae	Alphaproteobacteria
Alphaproteobacteria	Rhizobium leguminosarum	SIJX01000001.1	ELG68_02780	gi|1582934821|gb|TBH14268.1|	MRPLADLPAEWQVAVSGSEAVRRISALARQEIENHVRKVVLQENEELARRQADNIETLSRLDADRRQAHDDARAAGAKIEADLAKHRQRRDEAERIAAELQVQLGIEQERFAAYKSSAEQEKQLMEINYRRLTDLLTQKGNRLVALGLADAEDVSALIPEITGRGDERSGVGFTDALAGDYARLAPLLQSRLAEVGLLYSLAQLRDFLALLRTRDLIVLAGDSGSGKTSLVRAAAAAIGGVCTVIPVKPNWTGPEDLLGYYNPIERSYQATPFLLALQAAVRSPQVPHFICLDEMNLARVEYYFADFLSLLESRSTSPEIHLYTADEERHVVVEQGIFLAVDAEVRRRTGLPDTATLEDILRHDQANAELHRLGGLADNESVLVHHARLRRSLAAQMRM…	ELG68_02785	gi|1582930707|gb|TBH10154.1|	MDVLAHYLEIEWQAPGVARRVEVSTYPIEIEISPDGRLNAEISIFRDFAPWVGLQLAGALAGVEPCTINAENERLPWLQVSDGKDRTWWIPETGWSKAGNKHVSEMHRSFGSFSVELGPRQKLVLDAVALELDRAHAQEYLDDFRDEFVWLAIGRPSGALGEVGSDNSRDLLDALKGFTDAASRVLEHPAREIREVTGVVATARVRPNSETFRAVMRRPGARSYPGRTAQESADIPENRYLRGLVEHCRRLARSLTRSSGHHQAHLAARATREKSRAANLLAVERVEVDPEIFDNQLSDMRKRLDAIATWAASSVAPEPGERQYRFTVGKEFKGDGGAAKEFFYRNPDRDDRYDEREGISFSVARLPEDLHDLVIAASRFDKDICLELTGNAVITTFRT…	Rhizobium leguminosarum	Alphaproteobacteria
Alphaproteobacteria	Rhizobium leguminosarum	WUET01000002.1	GR207_02305	gb|NEH61407.1|	MRPLAELPAEWQVAVSGSESARRISALARQEIEDHVRKVVLQEDEELARRHADNVETLSKLDADRRQAQDNARAARAKIEANLAKHRRRRDEAERSAADLQVQLGIEQERFAAYKSTVEQEKQLMEINYRRLTDLFTEKGNRLVALGLADAEDVAALMPEMTGPEDERSGVGFTDALAGDYARLAPLLQSRLAEAGLLYSQAQLRDFLALLRTRDLIVLAGDSGSGKTSLVRAAAAAIGGVCTVIPVKPNWTGPEDLLGYYNPIERSYQATPFLLALQAAARSPHVPYFICLDEMNLARVEHYFADFLSLLESRSTAPEIHLYTADEERHVVVEQGIFLAVDAEARRRTGLPDTATLEEILRHDQANAELHRLAGLADNESVLVHHTRLRRSLAAQLRM…	GR207_02300	gb|NEH61406.1|	MGVLAHYLNIEWQAPGVTRRVEVSTYPIEIEVAPDGTLHAEVSIFRDFAPWVGLRLSGALAGVEPCTINAENERLPWLQVSDGNDQTWWIPETGWSKAGNKHVSEMHRSFGSFSVELGSRQKLILDAVALELDRAHAQEYLDDFRDELVWLAIGRPTGAMAEVGSDNSRDLRDALKGFTDAASRVLEHPAREIREVTGVVATARVRPNSETFRAVMRRPGARSYPGRTAQESADIPENRYLRGLVEHCRRLARSLARSSGHHQARLAARAARAKSRAADLLAVERLEVDPVIFDNQLSDIRRRLDAIATWSGSSIAPGPGERLYRFTVGKEFKVDRGAAREFFYRNPDRDDHYDEREGINFSVARLPDDLHDLVIAASRFDKDICLDLTGNAVITTFRT…	Rhizobium leguminosarum	Alphaproteobacteria
Alphaproteobacteria	Rhizobium leguminosarum	WUFQ01000037.1	GR239_33790	gb|NEK05487.1|	MRPLADLPTEWQVAVSGFESARRISALARREIEDHVRKVVLQEDEELARRHADNVETLSRLDADRRQAQDDARAARAKIEADLAKHRQCRDEAERSAADLQVQLGIQQERFAAYKSSVEQEKQLMEINYRRLTDLLTEKGNRLVALGLADAEDVAALMPEMMGTEDERSGVGFTDALAGDYARLAPLLQSRLAETGLLYSQAQLRDFLALLRTRDLIVLAGDSGSGKTSLVRAAAAAIGGVCTVIPVKPNWTGPEDLLGYYNPIERSYQATPFLLALQAAARRPHVPHFICLDEMNLARVEYYFADFLSLLESRSTSPEIHLYTADEERHVVVEQRIFLAMDAEARRRTGLPDTATLEEILRHDQANAELHRLGGLTDNESVLVHHTRLRRSLAAQLRM…	GR239_33785	gb|NEK05486.1|	MGVLAHYLDIEWQAPGVTRRVEVSTYPIKIEVAPDGTLHAEVSIFRDFAPWVGLRLSGALAGVEPCTINAENERLPWLQVSDGNDQTWWIPETGWSKAGNKHVSEMHRSFGSFSVELGSRQKLILDAVALELDRAHAQEYLDDFRDELVWLAIGRPTGALGEVGSDNSRDLLDALKGFNDAASRVLEHPAREIREVTGAVATARIRPNSETFRAVMRRPGARSYPGRTVQESADIPENRYLRGLVDHCRRLARSLARSSGHHQAHLAARVAREKSRAADLLAVERVEVDPEIFDNQLSDIRERLNAIATWSGSSVAPEPGERLYRLNVGKEFKVDRGAPKEFFYRNPDRDDRYDEREGIDFSVARLPDDLHDLVIAASRFDKDICLDVTGNAVITTFRT…	Rhizobium leguminosarum	Alphaproteobacteria
Alphaproteobacteria	Rhizobium leguminosarum	SIMN01000003.1	ELH36_31725	gi|1582473590|gb|TBC54486.1|	MERETQLMENRYRHISELVSQKGKRLLALGLVDEDDLALLLPEVRDGDEGEGLGLTEAIDGDLTRLAPLIQAKLAYRGLMYSQAQLRDYLALLRTRDLIVLAGDSGSGKTSLVKAVANAIGARTTIIPVKPNWTGPEDLLGYFNPIERSYHATPFLLALQAAAREPHVPHFICLDEMNLARVEYYFADFLSLLENRTSVPEIPLYTADEERHVVVEQALFLELEAEARRRADLGDDVGLEGILKDDTANEALRRLGGFSDGESVLRHHGRLRRSLSAQMRMPTSLRFPDNVWVIGAVNMDETTHHLSPKVLDRAHVLRFQNPMLADWDKIEAEIAEGREDIASPLQLAPVDLGLRADYPTFDRRDEDVNFLAHLARQHLDSLGIEFGLRAIRQSIGYIQ…	ELH36_31720	gi|1582473199|gb|TBC54095.1|	MTVPVLVHYLTIEWQEPGVARQIEVSTDPIEIEISGDGTMRAETTMFRDFHPWVGLRPRGELANTHPHLVGADGSRLPWMRIRDSNGQAWWVLENGWSRAGNRHLSEMHRSFGRFEVAIGQQRLIFENIAIELDRAQADDYLEDFRDELAWLALGKSYGATAEVSISHDKDLVEALSAFAAAAQRVLDHPARDIREITALASPARLRPNSTTFREVLRHPGARHYPGRAAQESADVPENRYLRHMLQVCERLSRRVARSSLRHGRQFAARAEREQARSAELLATETQAVDSEVFDNQFDDLKARIDAIADWRGPPTSDERDIREYSLQVGKVYDRIPNCLFYNREDGSPAADKARGIRYSVFELPKELFDLVEAGIRIDKKLSLVLHGIAQIQQNNDRR…	Rhizobium leguminosarum	Alphaproteobacteria
Alphaproteobacteria	Rhizobium leguminosarum bv. viciae	SJNN01000006.1	E0J20_04780	gi|1586793881|gb|TCB62775.1|	MRPLADLPAEWQVAVSGSESARRISALARREIEDHVRKVVLQEDEELARRHVDNVETLSKLDADRRQAQDDARAARAKIEADLAKHRRRRDEAERSAADLQVQLGIEQERFAAYKSTVEQEKQLMEINYRRLTDLFTEKGNRLVALGLADAEDVAAIMPEMTGPADERSGVGFIDALAGDYALLAPLLQSRLAEAGLLYSQAQLRDFLALLRTRDLIVLAGDSGSGKTSLVRAAAAAIGGVCTVIPVKPNWTGPEDLLGYYNPIERSYQATPFLLALQAAARSPHVPHFICLDEMNLARVEHYFADFLSLLESRSTAPEIHLYTADEERHVVVEQGIFLAVDAEARRRTGLPDTATLEEILRHDQANAELHRLAGLADNESVLVHHTRLRRSLAAQLRM…	E0J20_04785	gi|1586793860|gb|TCB62754.1|	MGVLAHYLDIEWQAPGLTRRVEVSTYPIEIEIAPDGTLHAEVSIFRDFAPWVGLQLSGALAGVEPCTINAENERLPWLQVSDGNDRMWWIPETGWSKAGNKHVSEMHRSFGSFSVELGSRQKLLLDAVALELDRAHAQEYLDDFRDELVWLAIGRPTGAMAEVGSDNSRDLLDALKGFTDAASRVLEHPAREIREVTGVVATARVRPNSETFRAVMRRPGARSYPGRTAQESADIPENRYVRGLVEHCRRLARSLARSSGHHQAHLAARAAREKSRAADLLAVERVEVDPVIFDNQLSDIRKRLDAIATWSGSSIAPGPGERLYRFTVGKEFKVDRGAAREFFYRNPDRDDHYDEREGINFSVARLPDDLHDLVIAASRFDKDICLDLTGNAVITTFRT…	Rhizobium leguminosarum bv. viciae	Alphaproteobacteria
Alphaproteobacteria	Ensifer adhaerens	JABEKT010000001.1	LPJGGPFB_01112	gb|NRP17885.1|	METAARKAGAAGGDIPGSLELALTRAPADLLHELRRAWGLNRSGPIWVVGRVWVKSLTDGRELWFLDDIEHPESGAGLLYPTLPGVQGRDDPEPSAAFIPPGPSRKVIGLRDAEAGKQWAVAELELSSLTERRKRRNPWLLNVRSGTMRLLADLPAEWQVAVSGSEAVRRISALARHEIESHVRKVVLQEDQELARRHADNVETLSRLDGDRRQAQDNARAARAKIEADLAKHRQRRDEAERSAADLQVQLGIEQERFAAYKSTVEQEKQLMEINYRRLTDLLTEKGNRLVALGLADAEDVAALIPQMTGPEDERSGVGFTDALAGDYARLAPLLQSRLAEAGLLYSQAQLRDFLALLRTRDLIVLAGDSGSGKTSLVRAAAAAIGGVCTVIPVKPNWT…	LPJGGPFB_01113	gb|NRP17886.1|	MGVLAHYLDIEWQAPGVARRVEVSTYPIEIETAPDGTLHAEVSIFRDFAPWVGLQLSGALAGVEPCTINAENERLPWLQVSDGGDRMWWIPETGWSKAGNKHVSEMHRSFGSFSVELGSRQKLILDAVALELDRAHAQEYLDDFTDELVWLAIGRPTGALGEVGSDNSRDLLFALKGFTDAASRVLEHPAREIREVTGVVATARVRPNSETFRAVMRRPGARSYPGRTAQESADIPENRYLRGLVEHCRRLARSLARSSSHHQAHLAARAVREKSRAADLLAVERVAVDPEIFDNQLSDIRKRLDSIATWSGSSVAPEPGERQYRFTVGKEFKGDRGAAKEFFYRNPDRDDRYDEREGIIFSVARLPDDLHDLVIAACRFDKDICLDLTGNAVITTFRT…	Ensifer adhaerens	Alphaproteobacteria
Alphaproteobacteria	Sinorhizobium medicae	WISK01000026.1	GHK80_06630	gb|MQX75934.1|	MRPLADLPAEWQVAVSGSESARRISALARHEIEDHVRKVVLQEDEELARRHADNVETLSRLDADRRQAQDDARAARAKIEADLAKHRQRRDEAERSAADLQVQLGIEQERFAAYKSTVEQEKQLMEINYRRLTDLLTEKGNRLVALGLADAEDVAALMPEMTGPEDERSGVGFTDALAGDYARLAPLLQSRLAEAGLLYSRAQLRDFLALLRTRDLIVLAGDSGSGKTSLVRAAAAAIGGVCTVIPVKPNWTGPEDLLGYYNPIERSYQATPFLLALQAAARSPHVPHFICLDEMNLARVEHYFADFLSLLESRSTSPEIHLYTADEERHVVVEQGIFLAVDAEARRRTGLPDTATLEEILRHDQANAELHRLGGLADNESVLVHHTRLRRSLAAQLRM…	GHK80_06635	gb|MQX75935.1|	MGVLAHYLDIEWQAPGVTRRVEVSTYPIEIEIAPDGTLHAEVSIFRDFAPWVGLQLSGALAGVEPCTINAKNERLPWLQVSDGNDRMWWIPETGWSKAGNKHVSEMHRSFGSFSVELGSRQKLILDAVALELDRAHAQEYLDDFRDELVWLAIGRPTGALGEVGSDNIRDLLDALKGFTDAASRVLEHPAREIREVTGVVATARVRPNSETFRAVMRRPGARSYPGRTAQESADIPENRYLRGLVEHCRRLARSLARSSGHHQAHLAARAAREKSRAADLLAVERVEVDPEIFDNQLSDIRKRLNAIATWSGSSVAPGPGERLYRFTVGKEFKVDRGAAKEFFYRNPDRDDRYDEREGINFSVARLPDDLHDLVIAASRFDKDICLDLTGNAVITTFRT…	Sinorhizobium medicae	Alphaproteobacteria
Alphaproteobacteria	Gemmobacter megaterium	FTOT01000001.1	SAMN05421774_101604	gi|1131877533|emb|SIS63739.1|	MRKHQNGKPHPESLAAGGNHALKEAIERSPSDLLKELRFVWDLPEDKPIRVIGRVWLKALADGRELWFLDDIEHPEKGVGLHYPTLSMDNKDAVVASAFVPPGPSRRVIDPQVAASGGQWAVAELELSPVAERQKQRNPWLMNVRSATLRPLSEIPVDWHVAVTGPESARRISTLARGEIENYLRKLVLDEDEELARRLVENDRALDNLVAARRQAEVEAAAVQAQVDAELSLHHQRRDEAERSVIEVQSQLRVEQERLAAYQRTVEQEKQTMEIAYRRLEELLSEKGDRLVALGLADAEDVAVLLPHLGAMEDAREGISFDDALPGGFAQLAPLLQCRMAQQGLLYSQPQLRDFLALLRTRDLVVLAGDSGSGKTSLVRATAKVIGGACTIIPVKPNW…	SAMN05421774_101603	gi|1131877532|emb|SIS63714.1|	MGVSAHYLDIDWDSPGIARRIEVSTYPIEIDTANDGTMHAEVSIFRNFAPWVGLQLSGQLANVEPATVDADGERHPWLPVLDEHGAVWWIPATGWSKPSSRHLSEMHRSFGTFSVELGPSRNLVIDAVANELDRAHAQEYLDDFQDELVWLAIGKPTGALGEAGSDYSRDLVDALREFAYAAGRILEHPALEIREVTALVHQSRLRPNAETFRAVLRRPGAHLYPGRSAQESADVPENRYLRGLVQHCRRVAQSIARSSSRHHGHLAARSAREKARAADLLATARIEVDQEIFDNQLADIRRHMDAIANWADGSVLSRSTEREYRFSVGKKYEGKGGGLFYRNLDGDSPNGAGEHFQVSVVQFPEGLHELVREAQGIDKDLTLALVGKASVRPFTTANG…	Gemmobacter megaterium	Alphaproteobacteria
Alphaproteobacteria	Shimia aestuarii	FOTQ01000002.1	SAMN04488042_102345	gi|1097736864|emb|SFL97310.1|	MLRNLPEDWVPALIGEESPRFISAAAMSVIEAEIKTEREKLQEELAVLHNETAEAVETLDGLRHAVVGEERKFVTLQEQSERETVLMETRVRRLNDLLEQKGRRLVALGLIDEDELTVLLPPSGEHSEQPGHSFQSDFGGDFERLAPFIQAKLYARGMLFSQAQLRDVLALVRTHDLFVLAGDSGSGKTSLIKATAESLGGRCTIVPVKPNWTGPEDLLGYFNPIERSYQSTPFLKALQFAASEPHILHFIVLDEMNLARVEHYFADFLSLLENRETVPDITLYTSDEERHTVVSHGLFLAIEEEVRKRVGLPETATLEDLLKNEEANRLLHRLGGFEDAESILEHHARLRRAMAAQIRTPTSLAIPPNVRIVGAINIDETTYFLSPKVLDRIHVVRFR…	SAMN04488042_102344	gi|1097736863|emb|SFL97278.1|	MPLVELRYLDVRWMASGTAKSVTVAPRSIPIEIELDGTMRAETEIFHDLYPVLGMRLDDSLAEHTPVFVTAGDDNVSMQPVTDTEGHTWWVEAGPWHERSKRHLCELHRTIGKFEIQVGDQRLILNNVAAGLGRVELEDFLRDFQNDLYWLLLGFGAGKAVLGGRPVPGGSKGEIGHDQRPHGADFLLADALERFSEAVERVLHRPSHDLHEVHGLQVLAKLRPNQMSFRQYVRNPSVNRLQGRQAEVTVDIAENRYIRHMVQVAAKLSEKLALATTRQVQALEERAASEIERCKEYRATQYRMVESSVFDRQLAEAQETLERIRGLSEWTSEQFPADARHIEISIGKQFGEGGNTFFCNKPDGKPTKDPSRGIKYWVIKLPDAFASAVTAARPLRPTY…	Shimia aestuarii	Alphaproteobacteria
Alphaproteobacteria	Oceanomicrobium pacificus	WUWG01000002.1	GSH16_06100	gb|MXU65010.1|	MSVIEAEIKTEREKLQEELGVLQNETAEAGGALNGLRHAVAGEERKLMTLQAKSEREIALMETRVRRLNDLLDQKGRRLVALGLIDEDDLAVLLPSSGKHSEQPGHSFQSDFGGDFERLAPFIQARLYARGMLFSQAQLRDVLALVRTHDLFVLAGDSGSGKTSLIKATVESLGGRCTIVPVKPNWTGPEDLLGYFNPIERSYQSTPFLKALQLAASEPHILHFIVLDEMNLARVEHYFADFLSLLENRETVPDITLYTSDEERHTVVSHGLFLAIEEEVRKRVGLPETATLEDLLKNEEANRLLHRLGGFEDAESILEHHARLRRAMAAQIRTPTSLAMPPNVRIVGAINIDETTYFLSPKVLDRIHVVRFRNPVLQDWSAIDAEVEESDLDLALPLY…	GSH16_06105	gb|MXU65011.1|	MPLVELRYLDVRWKASGTAKSVTVAPRSIPIEIELDGTMRAETEIFHDLYPVLGMRLDDALAEHTPVFVTAGEDNVRMQPVSDSEGHTWWVEAGPWHERSKRHLCELHRTIGKFEIQVGDQRLILNNVAAGLGRVELEDFLRDFQNDLYWLLLGFGSGKAVLGGRPVPGGSKGEIGHDQRPHGADLLLADALERFSEAVERVLHRPSHDLHEVHGLQVLAKLRPNQMSFRQYVRNPSVNRLQGRQAEVTVDIAENRYIRHMVQVAAKLSEKLALATTRQVQALEERAASEIERCKEYRATQYRMVESSVFDRQLAEAQETLERIRGLSEWTSEQFPADARHIEISIGKQFGEGGNTFFCNKPDGKPTKDPSRGIKYWVIKLPDALASAVTAARPLRPTY…	Oceanomicrobium pacificus	Alphaproteobacteria
Alphaproteobacteria	Sphingobium sp. EP60837	CP015986.1	EP837_01767	gi|1034621773|gb|ANI78179.1|	MNEFDDPESLQLLQPNVPRGGVALSAEIEQQVSRRSDGTSGVPDASLESALKRVPADLLHELRSAWGLNHAGPIWVVGRVWVKILSDGRELWFLDDIEHPESGVGLLYPTLPGVSGRDVADASAAFVPPGPSRKVIGQRAAEAGNQWAIAELELSSLTERRKRRNPWLLNVRSGSMRPLAEAPAEWQIAASGAESARRISSLARHEIENHVRKSILEEDEELARRHADNVEALGRLDAERRQAQDDALVARAEIEAELAKHRQNAVEAETAAADLQVRLGVEKQRFAMYRSTMEQEKQLMEITYRRLTDLLTEKGNRLIALGLADADDVAALLPDIAVAQDERLGVSFMDALGGDYARLAPLLQRSLADSGLLYSQAQLRDFLALLRTRDLIVLAGDSG…	EP837_01766	gi|1034621772|gb|ANI78178.1|	MGVLAHYLNIEWEARGVARQVEVSTYPIEIETSPGGTLHAEVSIFRDPAPWFGLQLSGALADVEPCTINAQDERLPWLKVLDERGGAWWIPETGWNKAGHKHISEMHRSFGSFSVDLGSSRKLILDAVALELDRAHAQDYLEDFTDELVWLAIGSRAGALGEIGSDSSRDLLDALRAFADAAGRVLEHPACEIREVTAVMATAKVRPNPETFRAVMRRPGARTYPGRTAQESSDIPENRYLRGLVEHCRRLARSVARSSSHHQSHLTARANRERSRAAELLAVENVDIDPEIFDNQLSDIRARLDAIAEWPGSTPTPGQTERLYRFTVGKEFRRERGGVKEFFYRNPDRDDRYDGRQGIDFSVARLPEDLHDLVIATSRFDKDVRLDLTGNAVITKFQT…	Sphingobium sp. EP60837	Alphaproteobacteria
Alphaproteobacteria	Sphingopyxis bauzanensis	NISK01000002.1	CDQ92_10675	gi|1209520816|gb|OWQ97472.1|	MEQGKQTMEIAYRRLEELLSAKGDRLVALGLADAEDVAALLPHLGTMEEAREGTSFADALPGGFAQLAPLLQSRMAEQGLLYSQAQLRDFLALLRTRDLVVLAGDSGSGKTSLVRAAAKAIGGACTIIPVKPNWTGPEDLLGYFNPIQRSYQATPFLLALQAAGRNPLVPHFICLDEMNLARVEHYFADFLSLLENRSIAPQIPLYTADEERHVVVEQGIFLEVEAEARRRSGLGDSATLEEVLRDDRANAELHRLGGFADNESVLLHHGRLRRSLAAQMRMPTSITLPENVWIFGAVNMDDTTHQLSAKVLDRVQVVRFRNPMLADWDAIEAEVQGAHQSLPSDLAELRMTPEDFGVRSDYPAFDRHDASVAFLSHLSREYLDPLGVEFGLRAIRQSQ…	CDQ92_10680	gi|1209520817|gb|OWQ97473.1|	MGVSAHHLEIEWDSSGIARRIEVSTYPIEIATARDGTMHAEVSIFRNFAPWVGLQLSGQLASVEPATVDAQGERHPWLPVLDKHGAVWWIPATSWSKPNSRYLSEMHRSFGTFSVELGPYRSLVIDAVANELDRAHAQEYLDDFRDELVWLAIGKPTGALGEVGSDYSRDLVDALGEFAQAAGRVLEHPAQEIREVTALAPPSRLRPNAETFRSVMRRPGARLYPGRAAQESADVPENRYLRGLVQHCRRVAQSLARSSSRHHGHLAARSAREKARAADLLVTEQIEVDQEIFDNQLADIRRRMDAIANWAVGSVLSRSNEREYRFSVGKKYEGKGGGLFYRNLDGDSQNGGGERFQFSVAQLPEGLHELVREAQSIDKDLTLALMGKASVSSFTTAKG…	Sphingopyxis bauzanensis	Alphaproteobacteria
Alphaproteobacteria	Sphingopyxis macrogoltabida	CP009431.1	LH19_28655	gi|938154873|gb|ALJ16768.1|	MTDGSHISQKASPSPAHARRSTSANADHRGSSPQRNRKLSLAEEEAVLAALSRTSEELLQELREAWDMPAGRPIRVVGRLTLTWRGSDGADMVFLNELEHPETGVGLVYPRIGTLVINPDPVNASVPPGPSRTITDAKTLASGEQWAIAEIELSTLEQRRRLRNPWVVTVRSGTLRLLSDLPDEWQVQVHGAQSVKRISASAREEIEDYVRNSVLEEDQELARSHAENIRRLAELATSRRQAEDDARAMLAGLNDELAAQQLRGDTARQEADGLQQRLTSERDQFERQQRHIEEETQLMELRYRRLKELLSEKRDRLIALGLVDAGDIDAVMWENEAGEEGRSGIRFSEALDSDLSRLAPVLQIELQKKGLLYPQALLRDFLALLRTRDLVVLAGDSGS…	LH19_28650	gi|938154872|gb|ALJ16767.1|	MDVLAHYLEIEWETENTPRKLVVSTHPIEIEIARDGVLHAEVSIFRDFAPWMGLHLSGALAEATPETIAAGGQRAPWLKIADEQGRAWWIPATGWSKKTGRHLAEMHRSFGTFQVEIGPRSKLTIDAVALELDRAHAQDYLDDFRDDLVWLAVGQPTGAAARAGSDYSNELVEALADFAQAARRVVEHPSRDVRETTALTATAKLRPSADTFRAVMRRPGAKVYPSRVAVDSADVPENRYVRGLVEHCRRLAHSIARASNRHQGHLAVRAEREKARAAALLAMNVVEIDQEIYDNQLDEVSCVMEAIGAWGPDIAASGRPPREFHFEVGKEFREAGNGPKELFYRNPTRDRVADDQVRIDFSVARLPDALHDLVMAARRIDPGLALTVAGHASLTTFST…	Sphingopyxis macrogoltabida	Alphaproteobacteria
Betaproteobacteria	Oligella urethralis	UATH01000001.1	NCTC11009_01838	gi|1410314258|emb|SPY08609.1|	MIEPTKFYQEQAIQKANYKNSDLKGLDDAELLKIIKTCWGYVESEPFEVIGKIVKINSQYRSFYILENLINIDFEKLEYPLDVVKNPGLHIGFELGVDFSVGDWVKAEVRLAPILERVKHDNYLELNVNPKSMTKLVKIPKDLWEQRLSRNSQYIEQWLIDFLADNKADEIRIRTNQLIDDIKVEKEEVVSTLNNLKQEYYKSKSNLESNIEIIQRQNVLIKNNDEELILKQNLIVEAELELSKIFENKENIVNRLNEFIKNKAKLLHDLDIVDEKLLNQITGSWQPVEDVREGHSLSENFSNIEEAIAYVQAYLHNKGIMYRREVLENFYTLLRTRDLIILAGDSGAGKTNLVKSFAEAIGGKSFIIPVKPNWTGAEDLLGYYNPIEQSYLSTQFLDA…	NCTC11009_01837	gi|1410314257|emb|SPY08608.1|	MQFEVRGLDIEWDESQRLVSIKKSHLPHQVYGDSGVFAVETVTFPKVAHFIGFRILNEKILHTPFFILGDLKEELIQLKDPLSNEIWWIQKGVWQKQYNKFVPESYRTAGRLELIIQDQRLIIQNNTNNFTVEELERFLALFKNNLWEIILNTNSVISANVEKNVPNVFNADVLECIDRVIHAAQKICKEPKFFLKEKQGLAPRNKVKPVARTFRELTTKKNLKLVSSRKHFTSFDTPENRYIHYCIDRLFFLINKMMERSEALVEQCNKLSNKYTDDSEKLKRIKNKKIDKEVFDAEIAEKRKKIESINGQLAEALSDASVENIYEDEYSYYSNSYEKQTLRNSKYGTFQLTINSIYSGTKNSFFCNQINGENVHIKLKNYPEKYLVIVYPTAIFNIL…	Oligella urethralis	Betaproteobacteria
Betaproteobacteria	Comamonas testosteroni	QURR01000008.1	DZC30_07825	gi|1466061739|gb|RGE45647.1|	MTDRLNRLSDLLNEKGQRLVALGLLDEIDLQELLPPGEVNDEQPKHDFQELLGADFSRLAPFVQARLWRTGMLFTQAQLRDFLALLRTHDVIVLAGDSGAGKTSMVRTVAESIGGRCTVIPVKPNWTGPEDLLGYYNPIERSYQPTPFLRALQAAQAEPEVPHFICLDEMNLARVEHYFADFLSLLETRKGNPQIPLYTSDEERHAVIENGVFLSIEAEVRSRVGLSEAATLEELLRNEEANALLHRLGGFKDAESVLLHHARLRRSLAAVTRTPTALYLPANVRIIGTVNIDETTHYLSPKVLDRVHVLRFRNPVLIDWDSVEAEVQTFDADLQLPVGLGAAGLGTREDYPPFDRHDPDAALLAGLARRHLDPLGVEFGLRAIRQSLHYLRQAQAAGI…	DZC30_07830	gi|1466061592|gb|RGE45500.1|	MHPEIEAHYLAVEWLEPGRARRVVVSPDPLDIELSPDGVLRLETQIFHDFHPWLGLRLSGQLRQSSPVFVDTQGQEHPMLAVDDGASGTWWVQGDGWDARKNKHLSELHRTMGRFDVRIGKHCLLIDNLATGLGQAQLEEYLQDFKNDLIWLVLSSGTATSSRAGASSGGGLPVALMEFASSAARVGSWPARILREVLAETPRSRLRPNSASFRQYARQPDRPRIIGRASEESADTADNRYLRHMVQVCNRIAFTAKQASDQQAERFAELACLEEKRSVDYGATETRQVNPEMFDRQIAELTEKLDRLAAWSDDDPDEDRDGLQDYRIEITKKYGRRGDEFFYEKPEGRSAYDDKKGIEYNVVRLPETLSSLVVAVQNFCRLFTLTGRPSIKLKNSLNG…	Comamonas testosteroni	Betaproteobacteria
Betaproteobacteria	Comamonas sp. JUb58	SOAL01000013.1	EDF71_113132	gi|1596618729|gb|TDS76739.1|	MLENKFRDLEALLRTRGERLVALDLVDRGDLSALISPQVQPETREGNDYQQVLGGDFAQLASYVQARLMRKNMLFSQAQLRDYLALMRTNDLVILAGDSGSGKTSLVRAVAESIGGRCTVIPVKPNWTGPEDLLGYYNPIERSYQATPFLQALQAAAREPNVPHFICLDEMNLARVEHYFADFLSLLEERDTSPAIPLYTSDEERHVVVENSLFLSLEEEARQRAGMDDGATFIEVLKNQQANALLHQLGGFQDAESVLVHHGRLRRSMSALLRTPNRIHFPGNVRIIGAINIDETTHYLSPKVLDRAHVLRFRNPVLMDWDAVAAEVEHFDVDVALPMFMSASDLGLRSPYPPYDRSNSHAALLTAWARVHLDPLGVEFGLRAIRQALGYMQAAHQAG…	EDF71_113133	gi|1596618730|gb|TDS76740.1|	MVISLQAHYLDIEWQEPGRARSVTVAPEPIEVEQHPDGSWFAETQVFNGLCPWVGLHLEGDLSHAHPTFEGGDGRQKPMLQILDGQARHWWVQEHGWDATGKRHLSELHRSIGQFTIWLGEQRLQLNNVVDELDRTLVEDYLNDFKQDLIWLVMGFGGATATTGSGATVNKGIVEALEAFATASHRVLAHPAQHVREVLIDSRPARLRPNVATFREYLRNPSAQRLTGRGAKETPNIADNRYLRHMVQVCEKLASHVAKAAEFHTSVFADRASVEAQRSTEYETTTHRRVEPEVFDRQMKDLEKKLERVSEFKTDIPEDGEAFRTFEFRPGELYASREDQMFYYSTDRRQASDAALDVSFSVVEVPPQLAEAIQASRSFCDYYAIEGIACATRRTTKTG…	Comamonas sp. JUb58	Betaproteobacteria
Betaproteobacteria	Undibacterium macrobrachii	BMYT01000004.1	GCM10011282_23980	gi|1901768653|dbj|GGX17145.1|	MSAKNIIYTLDEIKDLSDDELYQRLCECWGITNGKIEVWGELEISADEKWAGIKSVRTAENNLAISYPLYVSKNIDDGVFLPPFDAKKLLKGQEKVWIKCQLEFAKPEVRKKHENPFLLSVKRNSSERLVTLPRFNKAQILDDEVSSYLTETIYNLHFDAANKKITEVLAGKELELNQIESKRKETSDSVNNLAKRKNELEINREQLQSTISTQKDKIAVLLQQYQNIEQEMSQKIERLKSYISEKALFLKDFEFIDSEDFDRFIINASPSNERPAMLDFATVFDGDYKQAVSYIQAYLKEQDILYPRHIIENYLTLIRANDLIILAGDSGSGKTNLVQSFARAVGGVSKIIPVKPNWTSAEDLLGYYNPLEKKYLATPFLEALVEAQQYPEIPYFICL…	GCM10011282_23990	gi|1901768654|dbj|GGX17153.1|	MEAKFEVKYLDVKWYDKDTVLSVKESFIPLKTEFDAESQYFKCNTVIYPKVDGIKNGRMGFRFLFKNVSSPYLEAVDGTRIPLKLIIDNESGKEWWIEADTWIPETKMWGSKTIRTAGKMMVVLQHQICQVNIGSVDFTVDQLERYLFDFKSDLWELILDENSYVTGKVKKMQDGGVSEAGIHLIAKLLTHAQKILENPKSELREIQTLKPWKMVKPVTRTFMELTTKGESRFLTSRATKPSYNVPENRYILFALERIYKILKQLVNIFRSRVNRFDAAIEKLQVRYESFSDVKLIDKDLVRRDLERLRSLYKLDDLNQAIERKLGQLSLPSEKLKTWYLRVGNKSSHEQFAYSVSIKSDDDIDWVESKPYERKIFLSFKDDRFKSLFEKNIEYELDAE…	Undibacterium macrobrachii	Betaproteobacteria
Betaproteobacteria	Aromatoleum aromaticum	WTVO01000038.1	GPA23_11750	gb|NMG55315.1|	MKDRLNRLSDLLAEKGRRLVALGLVDEVDLQALLPPGDAKDEQPRHDFQELLGADFALLAPFVQARLWQTGMLFTQAQLRDFLALLRTHDVIVLAGDSGAGKTSLVRTVAESISARCTVIPVKPNWTGPEDLLGYYNPIERSYQPTPFLLALQAAQAEPEVPHFICLDEMNLARVEHYFADFLSLLETRKGNPQIPLYTSDEERHAVMENGIFLSIEAEVRSRVGLSDAATLEDLLKNEEANALLHRLGGFKGAESVLLHHARLRRSLAAVTRTPTALQLPANVRIIGTVNVDETTHYLSPKVLDRVHVLRFRNPVLIDWDTVEAEVQTFDADLHLPVRLGTEELGRREDYPPFDRHDPDAAFLAGLARRRLDPLGVEFGLRAIRQSLHYLRQAQAAGI…	GPA23_11745	gb|NMG55314.1|	MRLEIEARYLSVEWLERGRTRRVEVSSDPLDIELGFDGVLRVETQIFHDFYPWLGLRLSGRLHQSTPVFVDALGQEHPLLAVDDGAGSAWWVQDDGWDAVQQRHLSELHRTMGRFEVRVDDHRLLIENLATGLGRAQLDEYLQDFKHDLIWLVMSSGTATTAGASTSFRDELRAALSDFASAVTRVGSRPARVLREISAETRRSRVRPNAASFRQHARDPASPRLVGRASEETADTAENRYLRHMVRVCDRLARSADQAAQQQAERFADRARFEDERSEVYEATRSRQVNPEMFDRQLAELTKKLDRLAAWSDIDPDEQNIDLQDYRIEITRRYGVRDDEFFYEKPEGRSAFDKEKGVHYNVVRFPKALCDLVVATQNFCKVYTLIGRPSITLKQNSKG…	Aromatoleum aromaticum	Betaproteobacteria
Betaproteobacteria	Aromatoleum aromaticum EbN1	CR555306.1	ebA4601	gi|56314086|emb|CAI08731.1|	MDKYSERWKKWFSKGQSPSTDDVGNQPDASAVAVNHDENVALEAEHEANLMGEESSDELKMPQSYSGENESPRATLVAAGVSATDLSPKPGSTKRYEHPELKGMSDAELLQVLRQSWGCSGNKLEVWGQLTVAGFADKQFVKLSEVRSVRDNAFLSYPCEVAHPLKDRGIYIPSTYGWDLVESGHKFIRCELELSPHNHREKHGNPLAVTVKPGSAIPLKKIPVSISEQLISTEDATLISELVYEHYLGLKKRELGELESKLKAEIETNVETAKRALIEVLSAQKEAQAEMAKARNDHVQVEQENARLKEAISQLQYRQTEEAEKLVLLQATHEKAEKKMSQYLERLKHYIDDKATILKQLEFIDAEEFELLFGDRRDSKRDEGRLSFGQDLGGDYAVG…	ebA4602	gi|56314087|emb|CAI08732.1|	MGDIQEAKYIQVIWQDQATAKKIVESHEALELEAVDENTVQVEIVNYSQIDNGSQGQFAIRLDSQSDDVPRFVLENGRSIELLPVTDPVTGLCWWVEGKTWDKQRGRWLSDIYRGAGQVRIQVGAHTCRVNISSSTFTHQQLEGYLRDFQTDFWELILDDTSYISAAAKRSQHNLLDETTLRAIRKFIECVDRVLQKPKVELREVQRLKPRKDVRPVPRTFMELSTRGTSRTLTSRAYQETSDIPDNRYAHYALRKVYQITKALCTVAATQARSIERSLVTHRQRLSKFSNQKVINKDAVMHDMQDKERALRELESQMSTQNNYFAQLICEQPVNGQPCCQGTHVPRIQVAQGKRADYIQGVFLAVVRSRAGKDWFKPHDGGYVTVDFGVFSDQIRPEF…	Aromatoleum aromaticum EbN1	Betaproteobacteria
Gammaproteobacteria	Aeromonas veronii	LRBO01000012.1	WM54_09730	gi|1024206494|gb|KZW96586.1|	MVSEQVIYDLEEVKGLSDEELYQRLYDSWGLESHKIDVWGELSINEAGNWAGIRNAKTLNGNQNIEYPLADSHELQSGVFLNPSVAKIVLGNDSKGMVACELMLASIPQRAKKNNPFLLAVNDKTVERLTYLPDALPNLERQAIIHNEDETLLRKVIYDAEVKRVKHKIASETEALESALQEKQKDMTNKLAELSDALKSTQDKIKISTSELESSIKRNEELNNDNHRLNLKIQASKAELDVIIEKSRRAEENMARKVEKLTDFIKEKAIFLKNFEFLDEEDFDFFVGSTLSNKDLGEHISFAQSLDSNYSDAVSYIQAYLKDRDILYPRHIIENFLTLVRTNDLIILAGDSGSGKTNLVQSFAKAIGGVSKIIPVKPNWTSSEDLLGYYNPLEKKYLA…	WM54_09735	gi|1024206495|gb|KZW96587.1|	MEAPFVIKFIETKWHDKQTLVSVSESKYSLKLEQVGNNAFSAHTTIYPKVDELRFAQLAIKTKHGDQLPPYIAMPNGERRQLESIIDPASNAVWWVEPAHWDAKQRVWRSEARRTAGQITFVIGSSTLKLDIDISEKTKSDLSRYLLDFKADLWELILDENSHITGDAKNSQVAAIDQEALSLIASILTNAQTILKKPKVELKEVQALKPAKEVRPVPRTFMEICTKGSRKHLTSRASEPSYNVPENQYVSYVVSSTLSIVKQLARVAENKTSRFSSAVEKLNERLDSLKDYRSINRDLVVKDLERLKKQCSIKEINHELEDKLSQINSNISLQHLNVTTSYVKLENPTNPTNSENKWWAKVKYSLHAEWQQFEHDGYTILSSGSMYSSVFKSNCSYEI…	Aeromonas veronii	Gammaproteobacteria
Gammaproteobacteria	Marinobacter fuscus	PXNP01000085.1	C7H09_11670	gi|1362734704|gb|PSF05994.1|	MQGTGAEGFFASDLEGLTEAELVSLLKSQWGYAKEQPFDAIGRLKGITTNSGATFFILEELHSIHDGAALLYPLNEPDVRHTVFVGAINKTQLSVEPTDGLWVKARMELSPKQERTKHKNPFALKVVNGGLERLEAIPEEAANTDIVIDGESYIESWVLEFYRQKHQEQINKEGEQLRVELQQQRANEEQRVEALQSAVEKLDNQVKSQTDALHKTAEELATTRDLRDKTEIELGQRKKNMEYQLSRLNSFIEQKAKMLLELDLISEDDADNLLGQPGTESKRKGHDFSGVFASDLGQAISYVQAFMQHRGIIYRRKVLEDFFALLTTNDLIILAGDSGAGKTNLVKSFAEAIGGKSIIVPVKPNWTSAEDLLGYYNPLEQKYLSTPFLDALFEAARNP…	C7H09_11665	gi|1362734703|gb|PSF05993.1|	MLPAEVRYLDVFWSDPETVIKLVSSRDAIEFEQTPSGWKGETTTFPSTHHFIGVRVTDAKVEHTPYILAPNGNRQELRAVKQPGGDEVWWIQSDVWDQENKRWLSELYRTAGRVELIVQGQPLILENNTFNFTVAELEYYLADFKNSLWMLILDNNSPAKAGINKEAPDVFDNEVLGLLNSFIESVEKIVKKPGMVLSETQQKLPLRAVRPVPRTFREYATQPSTKLLSSRSFYESYDTSENRFIHYCIQRVLYVIRSLSKVAAAQERSYAQRIQQEIEWRDKLQATDTKKVDSRVYDNEIAKIEADLDELNQNLSKTVSKRCQKPFERRAERHGTYSIQLGASYRSSKTSFFANRLNGDDFRERYGTYLVVNFPCFDDFSLINSKLGGAELSVTGIYG…	Marinobacter fuscus	Gammaproteobacteria
Gammaproteobacteria	Colwellia chukchiensis	FOBI01000003.1	SAMN05216262_103123	gi|1094585512|emb|SEK85454.1|	MNEVIYSKEELEDLSEAELLDILKQSWGVNDNKIEVWGELPALGDTTFGFLRNPHLVSTGDRLYYPVQGVEIEPCSFFMAPQDASSCGSKKHKRFVRCELELSPESERRKHRNPLSLCVKSGTGENLRYLPKEIPLEILTNPNSEEEISQLISKSIYDFYHEKAMGDLDELVKKEQSEFELKMAQKERDATQSLEIIKDKIQENEEKRDTAIKLVEKLNSKQIELDKTISKLAQDKATKQTEIQTLVASYTRIEAEMNNKIKRLKEYVADKALFLKTFEFIDEEVLELFIQESQPSSVQVEGISFNDILNGDYQQAVSYIQSYLVSQDILYPRHIIENYMTLLRTKDLVILAGDSGSGKTNLVKSFAKAVGGKSIIVPVKPNWTSSEDLLGYYNPLEKK…	SAMN05216262_103122	gi|1094585511|emb|SEK85427.1|	MNVKPQFEIKYIELKWYDKNTLVKVTESLNALSVEYDSVNQCFTTETTIYPKLDEIKRGQLAIRVLNVEARQPYINLPNNDKKLLTQIKDPDTGIYWWILKEKWVSEQKQWFGIAPNIVGTLKFYITSQLCEVEINGSDFSVEQLEQYLRVFKNDLWELILDDSSAVQANAKQTNGIGVSEEVIECINKIVNAAQKILETPKVELREIQAIKPRKLVKPVNRTFMEMVSKSNQRFLTSRATQPSYNVPENRYILFALERCGRVLKQIVILAQNKSQRFLDTANKLKGQLDSFDTSVKVNRDLVVKDLERVRERTKLEYWQKKLNLKIQDNDIQLTTTRCSLDLYLHLENKTQQKDGFFVLIWNGESWVKPDNKSGILSLRNRYQVLLEVLEPGDTLKFN…	Colwellia chukchiensis	Gammaproteobacteria
Gammaproteobacteria	Litorilituus sediminis	CP034759.1	EMK97_03065	gi|1580125884|gb|QBG34791.1|	MNRCIDELQDFNDNDLLSYLKNDWDINTHDEIEVIGELKRIIGKNNRPSLVLKSVKGLNGEALEYPISDLHYKETLLQRGLSVAGYVDINDDINLLLDKTNTAIVKTRLELASPSERLKNKNPLLLETEYKNVQLLKQIDNKDIALDKEGNALIEKTIYNQLYQINKAKFEPEILVEIESEKERLSREIKESHEQKKLEIEEAILKLEQNLNSLTVEEETVKGSLRSIEGKVATTSKKLQEQDKSLSQAIQKSKVKKTELLNEIQIIKEQLKAEKENHMKMLEKLNAFVKSQADTLLGLEFIDENIYSQIVMEPQNDDRRDSLLSFNDDFKGNYKTATAHIQAYLYNKDIMYPRHILENYFALLQTNDLIILAGESGSGKTNLVKSFAEAVGGVSKIVP…	EMK97_03060	gi|1580125883|gb|QBG34790.1|	MELPGNIFEARYVRITWQDKSSALNIKTSKDSIEIIHGSETDFELEATAFSKVDIGVTGQLAFSVVDERITEPLCFDKPNGDRSQLIPVIDNETKRTWWVEGEIWFKGSRESKRKDKRWESEIFRSAGKVKLRVGKYSCSIKIRSHSFTYDQLENYLQDFKNELWYLILHETSYISAPVKEKQTRILDDSALDYFHRYIAFVEKILENPKLELRESQEQKNFRQVKPTPRTFMEIASSGFKTKLTSRAYKPSYNVPENQYVLFTANRLYNLLSNLGKVSSYVSKSLDEKVKAQEERLLNFSDNIKINRQAVESDYKELKEAVRQEQHMINVALAEQTEIDVYPDDSQYFDCELTLGSKLQSSGNPTFFLKSGLQPLIKPDYYLLSFDHAFTPLLKEWNT…	Litorilituus sediminis	Gammaproteobacteria
Gammaproteobacteria	Thalassotalea profundi	BNAH01000001.1	GCM10011501_02750	gi|1901663979|dbj|GHE78391.1|	MNEVIYSKEELDDRSEAELLDILKQSWGVNDNKIEVWGELPALGDTTFGFLRNPHLVSTGDRLYYPVQGLEIEPCSFFIAPQDAQKCGSKEHNSFVRCELELSPESERSKHNNPLSLCVKRGTGESLRSLPKEIPLEILTNPNSDEDSSQFISKSIYDFYHEKAMGDLDKLVKKKQSEFELKMAQREIDAIQSLEIIQDKIQENEEKRDVAIKLVEKLNNKQIELDKIVSKLTQDKVTKQTEIQTLVASYTRIEAEMNNKIKRLKEYVADKALFLKTFEFIDEEVLELFIQESQPSSDQVEGISFNDILNGDYQQAVSYIQSYLVSQDILYPRHIIENYITLLRTKDLVILAGDSGSGKTNLVKSFAKAVGGKSIIVPVKPNWTSSEDLLGYYNPLEKK…	GCM10011501_02760	gi|1901663980|dbj|GHE78399.1|	MNVKPQFEIKYIELKWYDKNTLVKVTESLNALSMEYDSVNQCFTTETTIYPKLDEIKRGQLAVRVLNVEAGQPYIYLPNNDKKLLTQIKDPDTGIYWWILKEKWVSEQKQWFGIAPNIVGTLKFYITSQRCEVEINGSDFSVEQLEQYLRVFKNDLWELILDDSSAVQANAKQTNGIGVSEEVIECINKIVNAAQKILETPKVELREIQAIKPRKLVKPVNRTFMEMVSKSNQRFLTSRATQPSYNVPENRYILFALERCGRVLKQIVILAQNKSQRFLDTANKLKGQLDSFDTSVKVNRDLVVKDLERVRERAKLEYWQKKLNLKIQDNDIQLTTTRCSLDLYLHLENKTQQKDGFFVLIWNGESWVKPDNKSGILSLRYRYQVLLEVLEPGDTLKFN…	Thalassotalea profundi	Gammaproteobacteria
Gammaproteobacteria	Pseudoalteromonas distincta	JWIG01000001.1	QT16_01245	gi|743334664|gb|KID40991.1|	MLGEPVKYSLDVVKDLSDEELYQRLFKCWGIKNKKIEVWGELTKQDGAVPYRLKHVRNVIDNKLIEYPIDVSYGLQSGIFVYPSIGNKYYITDQRTFVRGKLILTKLSERIKHGNPFELNLSSDDIEPLEQLPIAINEIDRLSDIDKSIVLGEGTERFIDKVIYEQQLSKLKTEFEETQKSEIETHLSRLNSMTRAVSIEKVELHAIKDSVESSKKENQQLGSESKLLRQSIEKKEHELAILDDKYKGLEEVMAKKIEKLKAFIEEKAVFLKSFEFIDDDEFNSFVSNITKVSERPEHIEFSDHLNGDYKQAVSYIQAYLKERDILYPRHIIENYLTLIRSNDLIILAGDSGSGKTNLVNSFADAVGGKSIIIPVKPNWTSSEDLLGYYNPLEKKYLAT…	QT16_01240	gi|743334138|gb|KID40465.1|	MKAEFEAKYIDITWYDKNTVLSITESLLPLDCEYEVDKYICSTVIYPKTEGIECGQLAFRFLKKSTIKPYFVNGAGEKIVLKCVLDTETLKEWWIEADSWSSKSKRWQGKAHRTAGSIKVYLAHEVCQVNIGSYDFTLEQLDTYLADFKSDLWELILDEQSYVKGKGKTVNDGVVTQDTITLVNNLLSHSQNILKNPKAELREVQTLKPRKAVKPVNRTFMELATKGGSKLLTSRSTEPSYNVPENRYILYVLERLYKIIKQLVAISQNKTKRYESNIVKLGSRLEAFVEDKLIDKDLVKKDLEKLRDSFNTKFLSANLQEKLELFNQRGLGEQNTSICFLKIGSKTKGGDSRFLAIKKEYSDNWFETEVATQNVFLKQGEPLFLNLLEQGFEYKIMGN…	Pseudoalteromonas distincta	Gammaproteobacteria
Gammaproteobacteria	Pseudoalteromonas sp. S186	PNEA01000024.1	CWB57_11290	gi|1672917803|gb|TMO10015.1|	MAEPSTVYSLNVVKDLADSELYQKLYESWGITGKKIDVWGELSMNESGNWAGVRNAKTLSGNQTIEYPLSGSNDLQSGVFLNPAMAKAFLGSNKKVIVACQLVLASPRQRASKNNPFLLAVDENTVEQLTDLTSVLSESERQDIVEDSENTLIRKAVYDLEVKETKEQIELEIDALKQSLQSTKAQTEQEVKKLEEAQGLSQKKVDDLEDVLKRLALEYEQLSEDKENVSQSISVSKAELETMVVRYRKVEESMVKKIEKLKAFIEEKAVFLKSFEFIDDDEFNSFVSNITKVSERPEHIEFSDHLNGDYKQAVSYIQAYLKERDILYSRHIIENYLTLIRSNDLIILAGDSGSGKTNLVNSFADAVGGKSIIIPVKPNWTSSEDLLGYYNPLEKKYLA…	CWB57_11295	gi|1672917804|gb|TMO10016.1|	MKAEFEARYVDITWYDKNTVLGITESLLPLDCQYEVDKYICSTVIYPKTEGIECGQLAFRFLKTSTAEPYFINGADDKVALKRVVDTETLKEWWIEADSWSSKSKRWQGKAHRTAGSIKVYLAHEVCQVNIGSYDFTLEQLDTYLADFKSDLWELILDEQSYVKGKGKTVNEGGVTQDTITLVNNLLSHCQNILKNPKAELREVQTLKPRKAVKPVNRTFMELATKGGSKLLTSRSTEPSYNVPENRYILYVLERLYKIIKQLVVISQNKTKRYESNVLKLGSRLEAFVEDKLIDKDLVKKDLEKLRDSFNKEILSANLQKQLELFNRNGSKEQNASVCFLKTGSMTKGGDSCFLAIKNEYSDNWFETEVATQNVFLRQGEPFFFNLLEQGFEYKIMGN…	Pseudoalteromonas sp. S186	Gammaproteobacteria
Gammaproteobacteria	Candidatus Thiodictyon syntrophicum	CP020370.1	THSYN_06075	gi|1297906888|gb|AUB80561.1|	MRPGRGWHASQPGSLLRRRSGSRPRRAAARADGRIYDQGRRDPPGLLGTQHPGGAKRLLRAYVKPQVDLLRRLELITDAQRHALFPNDNAPVDPALADWPEFDGDTPGAICHIQRYLFGTGIGYPWDLLANFHALLCTGDLIILSGLSGSGKTNLVKSYAKATGNVAKIISVKPNWTSAEDLIGFYNPLQRAYTGTPFIEALFAASRDPGRLYIICLDEMNLARVEYYFADFLSQLEERKDPSIDLYPDDEAGHVLTELRVLVQALLGLSLDLNAASLETLLADRPTMALLAERLALADGESFPQLHARIRRMLSGALTVPSRLPIPGNVRFVGAVNMDDTTHYLSPKVLDRAHVLQFQSPLEYWDQVRKEVGGADRSPHGIRIPASRFPNRAAYPEYD…	THSYN_06070	gi|1297906887|gb|AUB80560.1|	MDNSPSFELRIIRVAWAKQDIPLAVEVAQYPIPLQPDGTGWIAEIAAYPVLPSAGGGQLAVQLPPGAPAPVLIAADDRPVPMVPIRAPDGPEWWIEKGKWRNAKNGNYHDAPLCRHAGDARLQVGDDRIRLQVYAPGFEGGDFDALLDEFRNGAWQLILEPSSPTRGTDRRADGGVDPVFLEAVSAFIRYAGRALDQPHRELREVRELQPIERVRPHTGTFRELATRGAPRRVSGRGHVASFDTPENRQLLAMCGRLGRTLRALNAGAQGAASDFIRRALADDDRTRLMTDTLGRSKVDARGLERFIAELESRLGLYGVAKNQLLIGSGSAQGAELLVIDNPMVDAARGKPGFWGIGVWGHGKRERVRLNFSSDTGTLASVFWKKNPYGKRNCYRLSGG…	Candidatus Thiodictyon syntrophicum	Gammaproteobacteria
Gammaproteobacteria	Citrobacter freundii	CP016762.1	CfB38_4466	gi|1050867167|gb|ANZ89364.1|	MSNKVYEYSELEGLSDTELLATLQSSWGYEDDNFEVWGEVTLFKDREWGHLKNPRMLASNNLLSYPLTGVNGPCEFWINPADAKKYGDQRGARFIKCKLTLSRPKEREKHRIPFMMSVLPGSCSSLEKLPASVPHDIVTADDVSYFIANEIYHFYQQQAATRIEQEFATKQSMLDQQLTEALAEKQSAELKRDNAIKLVESLNSMRKKTEQSIALLETDNELKQKQLQITLENFKKIEVEMNHKILRLKKYVSDKAFFLKTFEFLDQEDLDNFLVESKSASQDVDGVVFREQLNGDYSQAISYIQSHLIQKDILYPRHIIENYLTLLRTKDLIILAGESGSGKTNLVKSFAKAVGGKAVIIPVKPNWTSSEDLLGYYNPLEKKYLATPFLDALLEAQLN…	CfB38_4467	gi|1050867168|gb|ANZ89365.1|	MTSTFEIKYIEIQWYDKDTVTKVTESLHVIPVEYNDEHSHFECETTIYPRTEGILRGQLAVRFIAGPAVIPCIKMSDGAEQQLFPVEDIDSGKTWWIVQDSWDAKEKYWRHSSVNTAGTLILVLDDVHCYINIGSMDFSREQLERYLAGFKDDLWELILDESSSVQASREQGSIGINNATIDCAQNIIMHAHKILSNPKAELREIQTLKPRKAVKPVNRTFMELATKTNQSVLTSRAVTPTFNMAENRYILFALERSYRIIKQIVILSGNKAKRYAALTDKLQQQYDSFTDSVTIDRDLVVKDLEIIRQRCKLSYWQQQLAQRIFSEKIVYDADGPQYNVLHFRSQKPTQENDGFFIEINVQGQWKKDNEKSTVLSFNSKVNESLLNLVRCLRQYAEYK…	Citrobacter freundii	Gammaproteobacteria
Gammaproteobacteria	Escherichia coli	CP034728.1	ELE40_22150	gi|1548982503|gb|AZU78436.1|	MALEQVIYNLEEVKGLSDEELYQRLYDSWGLENHKIDVWGELSINVARNWAGIRNAKTLSGNQSIEYPLADSHELQSGVFLTPSVAKIVLGNDTKGMVACELMLASIPQRAKKNNPFLLAVNDKTVERLTYLPDALPNLDRQALIQNEDETLLRKVIYDAEVKRVKHKIASETEALEAALQEKQQDMTDKLAELSDAFKSTQDKITASTTELESSIKRNEELNNDNHRLNLKIQESKAELDVIIEKSRKVEESMARKVEKLTDFIKEKAIFLKSFEFLDEEDFDFFVGSPLSNKERGEHISFSQALYSNYSDAVSYIQAYLKERGILYPRHIIENFLTLIRTNDLIILAGDSGSGKTNLVQSFAKAIGGVSKIIPVKPNWTSSEDLLGYYNPLEKKYLA…	ELE40_22155	gi|1548982504|gb|AZU78437.1|	METPFVIKFIETKWHDKQTLVSVSESEYSLKLEQTGNNAFSAHTTIYPKVDELRFAQLAIKTKQGDQSPPYIVMPNGDRKQLESITDPASNAVWWVEPAHWDAKQRVWRSEARRTAGQITFVIGNSTLKLDIDISEQTKSDLSRYLSDFKADLWELILDENSHITGDAKNSQVAAIDQEALSLVASILSNAQTILKKPKVELKEIQALKPAKEVRPVPRTFMEICTKGSRKHLTSRASEPSYNVPENQYVLYVVLSTLSIVKQLVKVAESKKSRFSGAIEKLNERLDSLKDYRIINRDLVVKDLERLKKRFDTEVINAELASQLGEINANKYFSQNHAAKGYLRLEKTTGSENEWWAKIKPSQHDDWQQFELDGYTIFSSGEYYASLFQPYSDYDMVAI…	Escherichia coli	Gammaproteobacteria
Gammaproteobacteria	Franconibacter daqui	BMKJ01000002.1	GCM10011513_21490	gi|1902026309|dbj|GGD23686.1|	MALEQVIYDPEEVKGLSDEGLYRRLCESWGSTSGKLAVWGKIQNRTNSGARKLPTLLLDIKSLQTGLDIEYPINVRLAMVKGVFVSFKSVEELFGIEDESFISCELALAPQSERKKHENPFECNVVVSSVRRLVKLPEYRTNDIIKGDESILLDDAVYKLHLQNVQSRIDGEVSALKAEFEREESSLKAQISSYEDLLQQIQEDLNKNNNVLSQARVKAQELEEKNTEWLRKIALQKKVEETMSKKIERLKAYVESKALFLKSFEFLDDEDFDFFVGNRSSAAQQGKHISFSQTLDSKYSNAVSYIQAHLKERDILYPRHIIENFLTLIRTNDLIILAGDSGSGKTNLVQSFAKAIGGVSKIIPVKPNWTSSEDLLGYYNPLEKKYLATPFLEALIEAK…	GCM10011513_21480	gi|1902026308|dbj|GGD23673.1|	MDVPFIIKFIETKWHDKQTLVSVNESEYSLKLEHLGNNTFSAHTIIYPRVDELRFAQLAIKAKHGDKSPPYIAMPNGEKKPLESVIDPASNSVWWVEPAHWDTKQRVWRSEARRTAGQITFVVGNSTLKLDIDISEQTKSDLSRYLLDFKADLWELILDENSHITGDAKNSLVAAIDQKALSLVASILINVQTILKKPKVELKEIQQLKPTKEVRPVPRTFMEICTKGSRNHLTSRASEPSYNVPENQYVLYVVSSTLNIVKQLVRVAESKTSRFSDAVDKLNERLESLKNYRSINRDLVVKDLERLKKLFDTKEINKDLANKLDEINANMYFSQNIATKVYLRLEKSTGSENEWWAKIKPQLSDDWQQFEQDRYTIFSSGSPYASLFKPYSDYEMEAI…	Franconibacter daqui	Gammaproteobacteria
Gammaproteobacteria	Klebsiella pneumoniae	JACNQO010000033.1	H8K80_26970	gb|MBC5123064.1|	MALEQVIYNLEEVKGLSDEELYQRLYDSWGLENHKIDVWGELSINEAGNWAGIRNAKTLSGNQSIEYPLADSHELQSGVFLTPSVAKIVLGNDTKGMVACELMLASIPQRAKKNNPFLLAVNDKTVERLTYLPDALPNLDRQALIQNEDETLLRKVIYDAEVKRVKHKIASETEALEAALQEKQQDMTDKLAELSDAFKSTQDKITASTTELESSIKRNEELNNDNHQLNLKIQESKAELDVIIEKSRKVEESMARKVEKLTDFIKEKAIFLKSFEFLDEEDFDFFVGSPLSNKERGEHISFSQALYSNYSDAVSYIQAYLKERDILYPRHIIENFLTLIRTNDLIILAGDSGSGKTNLVQSFAKAIGGVSKIIPVKPNWTSSEDLLGYYNPLEKKYLA…	H8K80_26975	gb|MBC5123065.1|	MEAPFVIKFIETKWHDKQTLVSVSESEYSLKLEQTGNNAFSAHTTIYPKVDELRFAQLAIKTKQGDQSPPYIAMPNGERRQLESITDPASNEEWWVEPAHWDAKQRVWRSEARRTAGQIMFVIGSSTLKLDIDISEQTKSDLSRYLSDFKADLWELILDESSHITGDAKNSQVAAIDQEALSLVASILSNAQTILKKPKVELKEIQALKPAKEVRPVPRTFMEICTKGSRKHLTSRASEPSYNVPENQYVLYVVSSTLSIVKQLVKVAESKKSRFSGAIEKLNERLDSLKDYRIINRDLVVKDLERLKKRFDTEVINAELSEQLAKINVNLSRSYSEKGYLRLEKATGSENEWWAKIKPSQNDDWQQFEPDGYTIFSSRDHYASLFKSYSDYEIEAKIP…	Klebsiella pneumoniae	Gammaproteobacteria
Gammaproteobacteria	Klebsiella pneumoniae	CP015026.1	WM91_27105	gi|1036561286|gb|ANK44728.1|	MALEQVIYNLEEVKGLSDEELYQRLYDSWGLENHKIDVWGELSINEAGNWAGIRNAKTLSGNQSIEYPLADSHELQSGVFLTPSVAKIVLGNDTKGMVACELMLASIPQRAKKNNPFLLAVNDKTVERLTYLPDALPNLDRQALIQNEDETLLRKVIYDAEVKRVKHKIASETEALEAALQEKQQDMTDKLAELSDAFKSTQDKITASTTELESSIKRNEELNNDNHRLNLKIQESKSELDVIIEKSRKVEESMARKVEKLTDFIKEKAIFLKSFEFLDEEDFDFFVGSPLSNKERGEHISFSQALYSNYSDAVSYIQAYLKERDILYPRHIIENFLTLIRTNDLIILAGDSGSGKTNLVQSFAKAIGGVSKIIPVKPNWTSSEDLLGYYNPLEKKYLA…	WM91_27100	gi|1036561285|gb|ANK44727.1|	MEAPFVIKFIETKWHDKQTLVSVSESEYSLKLEQTGNNAFSAHTTIYPKVDELRFAQLAIKTKQGDQSPPYIAMPNGERRQLESITDPASNEEWWVEPAHWDAKQRVWRSEARRTAGQIMFVIGSSTLKLDIDISEQTKSDLSRYLSDFKADLWELILDESSHITGDAKNSQVAAIDQEALSLVASILSNAQTILKKPKVELKEIQALKPAKEVRPVPRTFMEICTKGSRKHLTSRASEPSYNVPENQYVLYVVSSTLSIVKQLVKVAESKKSRFSGAIEKLNERLDSLKDYRIINRDLVVKDLERLKKRFDTEVINAELSEQLAKINVNLSRSYSEKGYLRLEKATGSENEWWAKIKPSQNDDWQQFEPDGYTIFSSRDHYASLFKSYSDYEIEAKIP…	Klebsiella pneumoniae	Gammaproteobacteria
Gammaproteobacteria	Klebsiella pneumoniae	CP021697.1	AM404_26210	gi|1202259218|gb|ARX41775.1|	MALEQVIYNLEEVKGLSDEELYQRLYDSWGLENHKIDVWGELSINEAGNWAGIRNAKTLSGNQSIEYPLADSHELQSGVFLTPSVAKIVLGNDTKGMVACELMLASIPQRAKKNNPFLLAVNDKTVERLTYLPDALPNLDRQALIQNEDETLLRKVIYDAEVKRVKHKIASETEALEAALQEKQQDMTDKLAELSDAFKSTQDKITASTTELESSIKRNEELNNDNHRLNLKIQESKSELDVIIEKSRKVEESMARKVEKLTDFIKEKAIFLKSFEFLDEEDFDFFVGSPLSNKERGEHISFSQALYSNYSDAVSYIQAYLKERDILYPRHIIENFLTLIRTNDLIILAGDSGSGKTNLVQSFAKAIGGVSKIIPVKPNWTSSEDLLGYYNPLEKKYLA…	AM404_26215	gi|1202259219|gb|ARX41776.1|	MEAPFVIKFIETKWHDKQTLVSVSESEYSLKLEQTGNNAFSAHTTIYPKVDELRFAQLAIKTKQGDQSPPYIAMPNGERRQLESITDPASNEEWWVEPAHWDAKQRVWRSEARRTAGQIMFVIGSSTLKLDIDISEQTKSDLSRYLSDFKADLWELILDESSHITGDAKNSQVAAIDQEALSLVASILSNAQTILKKPKVELKEIQALKPAKEVRPVPRTFMEICTKGSRKHLTSRASEPSYNVPENQYVLYVVSSTLSIVKQLVKVAESKKSRFSGAIEKLNERLDSLKDYRIINRDLVVKDLERLKKRFDTEVINAELSEQLAKINVNLSRSYSEKGYLRLEKATGSENEWWAKIKPSQNDDWQQFEPDGYTIFSSRDHYASLFKSYSDYEIEAKIP…	Klebsiella pneumoniae	Gammaproteobacteria
Gammaproteobacteria	Klebsiella pneumoniae	CAAGWO010000029.1	SAMEA104567816_05214	gi|1603447960|emb|VGD64159.1|	MALEQVIYNLEEVKGLSDEELYQRLYDSWGLENHKIDVWGELSINEAGNWAGIRNAKTLSGNQSIEYPLADSHELQSGVFLTPSVAKIVLGNDTKGMVACELMLASIPQRAKKNNPFLLAVNDKTVERLTYLPDALPNLDRQALIQNEDETLLRKVIYDAEVKRVKHKIASETEALEAALQEKQQDMTDKLAELSDAFKSTQDKITASTTELESSIKRNEELNNDNHRLNLKIQESKAELDVIIEKSRKVEENMARKVEKLTDFIKEKAIFLKSFEFLDEEDFDFFVGSPLSNKERGEHISFSQALYSNYSDAVSYIQAYLKERDILYPRHIIENFLTLIRTNDLIILAGDSGSGKTNLVQSFAKAIGGVSKIILVKPNWTSSEDLLGYYNPLEKKYLA…	SAMEA104567816_05213	gi|1603447959|emb|VGD64158.1|	MEAPFVIKFIETKWHDKQTLVSVSESEYSLKLEQTGNNAFSAHTTIYPKVDELRFAQLAIKTKQGDQSPPYIAMPNGERRQLESITDPASNEEWWVEPAHWDAKQRVWRSEARRTAGQIMFVIGSSTLKLDIDISEQTKSDLSRYLSDFKADLWELILDESSHITGDAKNSQVAAIDQEALSLVASILSNAQTILKKPKVELKEIQALKPAKEVRPVPRTFMEICTKGSRKHLTSRASEPSYNVPENQYVLYVVSSTLSIVKQLVKVAESKKSRFSGAIEKLNERLDSLKDYRIINRDLVVKDLERLKKRFDTEVINAELSEQLAKINVNLSRSYSEKGYLRLEKATGSENEWWAKIKPSQNDDWQQFEPDGYTIFSSRDHYASLFKSYSDYEIEAKIP…	Klebsiella pneumoniae	Gammaproteobacteria
Gammaproteobacteria	Klebsiella pneumoniae	UAWQ01000005.1	NCTC13465_00596	gi|1415684037|emb|SQC41356.1|	MARKVEKLTDFIKEKAIFLKSFEFLDEEDFDFFVGSPLSNKERGEHISFSQALYSNYSDAVSYIQAYLKERDILYPRHIIENFLTLIRTNDLIILAGDSGSGKTNLVQSFAKAIGGVSKIIPVKPNWTSSEDLLGYYNPLEKKYLATPFLEALIEAKQNPDIPYFICLDEMNLARVEYYFADFLSKLEERNEQPTIQLYSDDEAAHVLAELKGVVSVISNAQEKFSKNGIVDFVALMQDEEINAEMKRAFGFSDKDSLIKYHGDIRRMLAGVLGTPSSITIPANVRIIGAINIDETTHYLSPKILDRAHVMKFKSPLLTDWDAIFDEIDSYGLDDVTLPLVFDIEELGERTPYPKFERLNEFCELFTTLNRDVFDPLGVEFGMRTIRQGLNYVSLFSDV…	NCTC13465_00597	gi|1415684038|emb|SQC41357.1|	MEAPFVIKFIETKWHDKQTLVSVSESEYSLKLEQTGNNAFSAHTTIYPKVDELRFAQLAIKTKQGDQSPPYIAMPNGERRQLESITDPASNEEWWVEPAHWDAKQRVWRSEARRTAGQIMFVIGSSTLKLDIDISEQTKSDLSRYLSDFKADLWELILDESSHITGDAKNSQVAAIDQEALSLVASILSNAQTILKKPKVELKEIQALKPAKEVRPVPRTFMEICTKGSRKHLTSRASEPSYNVPENQYVLYVVSSTLSIVKQLVKVAESKKSRFSGAIEKLNERLDSLKDYRIINRDLVVKDLERLKKRFDTEVINAELSEQLAKINVNLSRSYSEKGYLRLEKATGSENEWWAKIKPSQNDDWQQFEPDGYTIFSSRDHYASLFKSYSDYEIEAKIP…	Klebsiella pneumoniae	Gammaproteobacteria
Gammaproteobacteria	Klebsiella pneumoniae	UIVQ01000027.1	SAMEA3649855_04838	gi|1462246090|emb|SVP79615.1|	MALEQVIYNLEEVKGLSDEELYQRLCESWGITNGKLAVWGKILNGPDSDSRKLPTRLLEIKSLQTGLDTEYPINVRLTMDKGVFVSFKSVEELFGLEDGSFVSCELALAPQSEREKHENPFECNVVVSSVRRLIKLPEYTANDIIKGDENIFLDDAVYKLHLQNVQSRIDSEVTALNAEFEREESSLKAQISSYKDQLQHVQDDLNQKNNVLSQAIAKAQKLEVEHSEWQHKIALQKKAEETMSKKIERLKAYVESKAGFLKSFEFLDDDDFDLFVGSTLSNKDRDEHISFSQAFDSNYSDAVSYIQAHLKERDILYPRHIIENFLTLIRTHDLIILAGDSGSGKTNLVQSFAKAIGGVSKIIPVKPNWTSSEDLLGYYNPLEKKYLVTPFLEALIEAK…	SAMEA3649855_04839	gi|1462246091|emb|SVP79618.1|	MEAPFLIKFIETKWHDKQTLVSVSESEYSLKLEQTGNNAFSANTTIYPKVDELRFAQLAIKTKQGDQSPPYIVMPNGDRKQLESITDPASNAVWWVEPAHWDAKQRVWRSEARRTAGQITFVIGNSTLKLDIDISEQTKSDLSRYLSDFKADLWELILDENSHITSDAKNSQVAAIDQEALSLVASILSNAQTILKKPKVELKEIQALKPAKEVRPVPRTFMEICTKGSRKHLTSRASEPSYNVPENQYVLYVVSSTLSIVKQLVKVAESKKSRFSGAIEKLNERLDSLKDYRIINRDLVVKDLERLKKRFDTEVINAELSEQLAKINVNLSRSYSEKGYLRLEKATGSENEWWAKIKPSQNDDWQQFEPDGYTIFSSRDHYASLFKSYSDYEIEAKIP…	Klebsiella pneumoniae	Gammaproteobacteria
Gammaproteobacteria	Raoultella planticola	CABDVS010000001.1	NCTC9179_00137	gi|1677292743|emb|VTM94123.1|	MALEQVIYNLEEVKGLSDEELYQRLYDSWGLENHKIDVWGELSINEAGNWAGIRNAKTLSGNQSIEYPLADSHELQSGVFLTPSVAKIVLGNDTKGMVACELMLASIPQRAKKNNPFLLAVNDKTVERLTYLPDALPNLDRQALIQNEDETLLRKVIYDAEVKRVKHKIASETEALEAALQEKQQDITDKLAELSDAFKSTQDKITASTTELESSIKRNEELNNDNHRLNLKIQESKAELDVIIEKSRKVEESMARKVEKLTDFIKEKAIFLKSFEFLDEEDFDFFVGSPLSNKERGEHISFSQALYSNYSDAVSYIQAYLKERDILYPRHIIENFLTLIRTNDLIILAGDSGSGKTNLVQSFAKAIGGVSKIIPVKPNWTSSEDLLGYYNPLEKKYLA…	NCTC9179_00138	gi|1677292744|emb|VTM94125.1|	MEALFVIKFIETKWHDKQTLVSVSESEYSLKLEQTGNNAFSAHTTIYPKVDELRFAQLAIKTKQGDQSPPYIAMPNGERRQLESITDPASNEEWWVEPAHWDAKQRVWRSEARRTAGQIMFVIGSSTLKLDIDISEQTKSDLSRYLSDFKADLWELILDESSHITGDAKNSQVAAIDQEALSLVASILSNAQTILKKPKVELKEIQALKPAKEVRPVPRTFMEICTKGSRKHLTSRASEPSYNVPENQYVLYVVSSTLSIVKQLVKVAESKKSRFSGAIEKLNERLDSLKDYRIINRDLVVKDLERLKKRFDTEVINAELSEQLAKINVNLSRSYSEKGYLRLEKATGSENEWWAKIKPSQNDDWQQFEPDGYTIFSSRDHYASLFKSYSDYEIEAKIP…	Raoultella planticola	Gammaproteobacteria
Gammaproteobacteria	Salmonella enterica	DAAQCO010000013.1	G1314_22685	tpg|HAD8723862.1|	MALEQVIYNLEEVKGLSDEELYQRLYDSWGLENHKIDVWGELSINVAGNWAGIRNAKTLSGNQSIEYPLADSHELQSGVFLTPSVAKIVLGNDTKGMVACELMLASIPQRAKKNNPFLLAVNDKTVERLTYLPDALPNLDRQALIQNEDETLLRKVIYDAEVKRVKHKIASETEALEAALQEKQQDMTDKLAELSDAFKSTQDKITASTTELESSIKRNEELNNDNHRLNLKIQESKAELDVIIEKSRKVEESMARKVEKLTDFIKEKAIFLKSFEFLDEEDFDFFVGSPLSNKERGEHISFSQALYSNYSDAVSYIQAYLKERDILYPRHIIENFLTLIRTNDLIILAGDSGSGKTNLVQSFAKAIGGVSKIIPVKPNWTSSEDLLGYYNPLEKKYLA…	G1314_22690	tpg|HAD8723863.1|	METPFVIKFIETKWHDKQTLVSVSESEYSLKLEQTGNNAFSAHTTIYPKVDELRFAQLAIKTKQGDQSPPYIVMPNGDRKQLESITDPASNAVWWVEPAHWDAKQRVWRSEARRTAGQITFVIGNSTLKLDIDISEQTKSDLSRYLSDFKADLWELILDENSHITGDAKNSQVAAIDQEALSLVASILSNAQTILKKPKVELKEIQALKPAKEVRPVPRTFMEICTKGSRKHLTSRASEPSYNVPENQYVLYVVLSTLSIVKQLVKVAESKKSRFSGAIEKLNERLDSLKDYRIINRDLVVKDLERLKKRFDTEVINAELASQLGEINANKYFSQNHAAKGYLRLEKTTGSENEWWAKIKPSQHDDWQQFELDGYTIFSSGEYYASLFQPYSDYDMVAI…	Salmonella enterica	Gammaproteobacteria
Gammaproteobacteria	Salmonella enterica	AAFANN010000062.1	DCH30_22010	gb|EBE0270347.1|	MALEQVIYNLEEVKGLSDEELYQRLYDSWGLENHKIDVWGELSINVAGNWAGIRNAKTLSGNQSIEYPLADSHELQSGVFLTPSVAKIVLGNDTKGMVACELMLASIPQRAKKNNPFLLAVNDKTVERLTYLPDALPNLDRQALIQNENETLLRKVIYDAEVKRVKHKIASETEALEAALQEKQQDMTDKLAELSDAFKSTQDKITASTTELESSIKRNEELNNDNHRLNLKIQESKAELDVIIEKSRKVEESMARKVEKLTDFIKEKAIFLKSFEFLDEEDFDFFVGSPLSNKERGEHISFSQALYSNYSDAVSYIQAYLKERDILYPRHIIENFLTLIRTNDLIILAGDSGSGKTNLVQSFAKAIGGVSKIIPVKPNWTSSEDLLGYYNPLEKKYLA…	DCH30_22015	gb|EBE0270348.1|	METPFVIKFIETKWHDKQTLVSVSESEYSLKLEQTGNNAFSAHTTIYPKVDELRFAQLAIKTKQGDQSPPYIVMPNGDRKQLESITDPASNAVWWVEPAHWDAKQRVWRSEARRTAGQITFVIGNSTLKLDIDISEQTKSDLSRYLSDFKADLWELILDENSHITGDAKNSQVAAIDQEALSLVASILSNAQTILKKPKVELKEIQALKPAKEVRPVPRTFMEICTKGSRKHLTSRASEPSYNVPENQYVLYVVLSTLSIVKQLVKVAESKKSRFSGAIEKLNERLDSLKDYRIINRDLVVKDLERLKKRFDTEVINAELASQLGEINANKYFSQNHAAKGYLRLEKTTGSENEWWAKIKPSQHDDWQQFELDGYTIFSSGEYYASLFQPYSDYDMVAI…	Salmonella enterica	Gammaproteobacteria
Gammaproteobacteria	Salmonella enterica	AADLGY010000060.1	EPL23_24750	gb|EAR5325012.1|	MALEQVIYNLEEVKGLSDEELYQRLYDSWGLENHKIDVWGELSINEAGNWAGIRNAKTLSGNQSIEYPLADSHELQSGVFLTPSVAKIVLGNDTKGMVACELMLASIPQRAKKNNPFLLAVNDKTVERLTYLPDALPNLDRQALIQNEDETLLRKVIYDAEVKRVKHKIASETEALEAALQEKQQDMTDKLAELSDAFKSTQDKITASTTELESSIKRNEELNNDNHRLNLKIQESKAELDVIIEKSRKVEESMARKVEKLTDFIKEKAIFLKSFEFLDEEDFDFFVGSPLSNKERGEHISFSQALYSNYSDAVSYIQAYLKERDILYPRHIIENFLTLIRTNDLIILAGDSGSGKTNLVQSFAKAIGGVSKIIPVKPNWTSSEDLLGYYNPLEKKYLA…	EPL23_24755	gb|EAR5325013.1|	METPFVIKFIETKWHDKQTLVSVSESEYSLKLEQTGNNAFSAHTTIYPKVDELRFAQLAIKTKQGDQSPPYIVMPNGDRKQLESITDPASNAVWWVEPAHWDAKQRVWRSEARRTAGQITFVIGNSTLKLDIDISEQTKSDLSRYLSDFKADLWELILDENSHITGDAKNSQVAAIDQEALSLVASILSNAQTILKKPKVELKEIQALKPAKEVRPVPRTFMEICTKGSRKHLTSRASEPSYNVPENQYVLYVVSSTLSIVKQLVKVAESKKSRFSGAIEKLNERLDSLKDYRIINRDLVVKDLERLKKRFDTEVINAELASQLGEINANKYFSTNHAAKGYLRLEKTTGSENEWWAKIKPSQHDDWQQFELDGYTIFSSGEYYASLFQPYSDYDMVAI…	Salmonella enterica	Gammaproteobacteria
Gammaproteobacteria	Salmonella enterica	AACZUL010000023.1	EVL25_23645	gb|EAO0193670.1|	MALEQVIYNLEEVKGFSDEELYQCLCESWGITNGKLAVWGKILNGPDSDSRKLPTRLLEIKSLQTGLDTEYPINVRLTMDKGVFVSFKSVEELFGLEDGSFVSCELALAPQSEREKHENPFECNVVVSSVRRLIKLPEYTANDIIKGDENIFLDEAVYKQHLQNVQSRIDSEVTALNAEFEREESSLKAQISSYKDQLQHVQDDLNQKNNVLSQAIAKAQKLEVEHSEWQHKIALQKKAEETMSKKIERLKAYVESKAGFLKSFEFLDDDDFDLFVGSTLSNKDRDEHISFSQAFDSNYSDAVSYIQAHLKERDILYPRHIIENFLTLIRTHDLIILAGDSGSGKTNLVQSFAKAIGGVSKIIPVKPNWTSSEDLLGYYNPLEKKYLVTPFLEALIEAK…	EVL25_23650	gb|EAO0193671.1|	MEAPFVIKFIETKWHDKQTLVSVSESEYSLKLEQTGNNAFSAHTTIYPKVDELRFAQLAIKTKQGDQSPPYIVMPNGDRKQLESITDPASNAVWWVEPAHWDAKQRVWRSEARRTAGQITFVIGNSTLKLDIDISEQTKSDLSRYLSDFKADLWELILDENSHITGDAKNSQVAAIGQEALSLVASILSNAQTILKKPKVELKEIQALKPAKEVRPVPRTFMEICTKGSRKHLTSRASEPSYNVPENQYVLYVVSSTLSIVKQLVKVAESKKSRFSGAIEKLNERLDSLKDYRIINRDLVVKDLERLKKRFDTEVINAELSEQLAKINVNLSRSYSEKGYLRLEKATGSENEWWAKIKLSQNDDWQQFEPDGYTIFNSRDHYASLFKAYSDYEIEAKIP…	Salmonella enterica	Gammaproteobacteria
Gammaproteobacteria	Salmonella enterica subsp. enterica	AAAFRJ010000034.1	DU092_24030	gb|EAB7500652.1|	MALEQVIYNLEEVKGLSDEELYQRLYDSWGLENHKIDVWGELSINVAGNWAGIRNAKTLSGNQSIEYPLADSHELQSGVFLTPSVAKIVLGNDTKGMVACELMLASIPQRAKKNNPFLLAVNDKTVERLTYLPDALPNLDRQALIQNEDETLLRKVIYDAEVKRVKHKIASETEALEAALQEKQQDMTDKLAELSDAFKSTQDKITASTTELESSIKRNEELNNDNHRLNLKIQESKAELDVIIEKSRKVEESMARKVEKLTDFIKEKAIFLKSFEFLDEEDFDFFVGSPLSNKERGEHISFSQALYSNYSDAVSYIQAYLKERDILYPRHIIENFLTLIRTNDLIILAGDSGSGKTNLVQSFAKAIGGVSKIIPVKPNWTSSEDLLGYYNPLEKKYLA…	DU092_24035	gb|EAB7500653.1|	METPFVIKFIETKWHDKQTLVSVSESEYSLKLEQTGNNAFSAHTTIYPKVDELRFAQLAIKTKQGDQSPPYIVMPNGDRKQLESITDPASNAVWWVEPAHWDAKQRVWRSEARRTAGQITFVIGNSTLKLDIDISEQTKSDLSRYLSDFKADLWELILDENSHITGDAKNSQVAAIDQEALSLVASILSNAQTILKKPKVELKEIQALKPAKEVRPVPRTFMEICTKGSRKHLTSRASEPSYNVPENQYVLYVVLSTLSIVKQLVKVAESKKSRFSGAIEKLNERLDSLKDYRIINRDLVVKDLERLKKRFDTEVINAELASQLGEINANKYFSQNHAAKGYLRLEKTTGSENEWWAKIKPSQHDDWQQFELDGYTIFSSGEYYASLFQPYSDYDMVAI…	Salmonella enterica subsp. enterica	Gammaproteobacteria
Gammaproteobacteria	Salmonella enterica subsp. enterica serovar Agona	AAGQWF010000045.1	DNU66_23505	gb|EBR0135359.1|	MALEQVIYNLEEVKGLSDEELYQRLYDSWGLENHKIDVWGELSINVAGNWAGIRNAKTLSGNQSIEYPLADSHELQSGVFLTPSVAKIVLGNDTKGMVACELMLASIPQRAKKNNPFLLAVNDKTVERLTYLPDALPNLDRQALIQNEDETLLRKVIYDAEVKRVKHKIASETEALEAALQEKQQDMTDKLAELSDAFKSTQDKITASTTELESSIKRNEELNNDNHRLNLKIQESKAELDVIIEKSRKVEESMARKVEKLTDFIKEKAIFLKSFEFLDEEDFDFFVGSPLSNKERGEHISFSQALYSNYSDAVSYIQAYLKERDILYPRHIIENFLTLIRTNDLIILAGDSGSGKTNLVQSFAKAIGGVSKIIPVKPNWTSSEDLLGYYNPLEKKYLA…	DNU66_23510	gb|EBR0135360.1|	METPFVIKFIETKWHDKQTLVSVSESEYSLKLEQTGNNAFSAHTTIYPKVDELRFAQLAIKTKQGDQSPPYIVMPNGDRKQLESITDPASNAVWWVEPAHWDAKQRVWRSEARRTAGQITFVIGNSTLKLDIDISEQTKSDLSRYLSDFKADLWELILDENSHITGDAKNSQVAAIDQEALSLVASILSNAQTILKKPKVELKEIQALKPAKEVRPVPRTFMEICTKGSRKHLTSRASEPSYNVPENQYVLYVVLSTLSIVKQLVKVAESKKSRFSGAIEKLNERLDSLKDYRIINRDLVVKDLERLKKRFDTEVINAELASQLGEINANKYFSQNHAAKGYLRLEKTTGSENEWWAKIKPSQHDDWQQFELDGYTIFSSGEYYASLFQPYSDYDMVAI…	Salmonella enterica subsp. enterica serovar Agona	Gammaproteobacteria
Gammaproteobacteria	Salmonella enterica subsp. enterica serovar Mbandaka	AAPRTW010000034.1	GWG78_22860	gb|EEH1179871.1|	MALEQVIYNLEEVKGFSDEELYQRLCESWGITNGKLAVWGKILNGPDSDSRKLPTRLLEIKSLQTGLDTEYPINVRLTMDKGVFVSFKSVEELFGLEDGSFVSCELALAPQSEREKHENPFECNVVVSSVRRLIKLPEYTANDIIKGDENIFLDEAVYKQHLQNVQSRIDSEVTALNAEFEREESSLKAQISSYKDQLQHVQDDLNQKNNVLSQAIAKAQKLEVEHSEWQHKIALQKKAEETMSKKIERLKAYVESKAGFLKSFEFLDDDDFDLFVGSTLSNKDRDEHISFSQAFDSNYSDAVSYIQAHLKERDILYPRHIIENFLTLIRTHDLIILAGDSGSGKTNLIQSFAKAIGGVSKIIPVKPNWTSSEDLLGYYNPLEKKYLVTPFLEALIEAK…	GWG78_22865	gb|EEH1179872.1|	MEAPFVIKFIETKWHDKQTLVSVSESEYSLKLEQTGNNAFSAHTTIYPKVDELRFAQLAIKTKQGDQSPPYIVMPNGDRKQLESITDPASNAVWWVEPAHWDAKQRVWRSEARRTAGQITFVIGNSTLKLDIDISEQTKSDLSRYLSDFKADLWELILDENSHITGDAKNSQVAAIGQEALSLVASILSNAQTILKKPKVELKEIQALKPAKEVRPVPRTFMEICTKGSRKHLTSRASEPSYNVPENQYVLYVVSSTLSIVKQLVKVAESKKSRFSGAIEKLNERLDSLKDYRIINRDLVVKDLERLKKRFDTEVINAELSEQLAKINVNLSRSYSEKGYLRLEKATGSENEWWAKIKLSQNDDWQQFEPDGYTIFSSRDHYASLFKAYSDYEIEAKIP…	Salmonella enterica subsp. enterica serovar Mbandaka	Gammaproteobacteria
Gammaproteobacteria	Salmonella enterica subsp. enterica serovar Muenster	AAGQWU010000044.1	DNV85_23585	gb|EBR0204415.1|	MALEQVIYNLEEVKGFSDEELYQCLCESWGITNGKLAVWGKILNGPDSDSRKLPTRLLEIKSLQTGLDTEYPINVRLTMDKGVFVSFKSVEELFGLEDGSFVSCELALAPQSEREKHENPFECNVVVSSVRRLIKLPEYTANDIIKGDENIFLDEAVYKQHLQNVQSRIDSEVTALNAEFEREESSLKAQISSYKDQLQHVQDDLNQKNNVLSQAIAKAQKLEVEHSEWQHKIALQKKAEETMSKKIERLKAYVESKAGFLKSFEFLDDDDFDLFVGSTLSNKDRDEHISFSQAFDSNYSDAVSYIQAHLKERDILYPRHIIENFLTLIRTHDLIILAGDSGSGKTNLVQSFAKAIGGVSKIIPVKPNWTSSEDLLGYYNPLEKKYLVTPFLEALIEAK…	DNV85_23590	gb|EBR0204416.1|	MEAPFVIKFIETKWHDKQTLVSVSESEYSLKLEQTGNNAFSAHTTIYPKVDELRFAQLAIKTKQGDQSPPYIVMPNGDRKQLESITDPASNAVWWVEPAHWDAKQRVWRSEARRTAGQITFVIGNSTLKLDIDISEQTKSDLSRYLSDFKADLWELILDENSHITGDAKNSQVAAIGQEALSLVASILSNAQTILKKPKVELKEIQALKPAKEVRPVPRTFMEICTKGSRKHLTSRASEPSYNVPENQYVLYVVSSTLSIVKQLVKVAESKKSRFSGAIEKLNERLDSLKDYRIINRDLVVKDLERLKKRFDTEVINAELSEQLAKINVNLSRSYSEKGYLRLEKATGSENEWWAKIKLSQNDDWQQFEPDGYTIFNSRDHYASLFKAYSDYEIEAKIP…	Salmonella enterica subsp. enterica serovar Muenster	Gammaproteobacteria
Gammaproteobacteria	Salmonella enterica subsp. enterica serovar Senftenberg	AALOBS010000039.1	BBD70_24440	gb|EDB6071595.1|	MALEQVIYNLEEVKGLSDEELYQRLYDSWGLENHKIDVWGELSINEAGNWAGIRNAKTLSGNQSIEYPLADSHELQSGVFLTPSVAKIVLGNDTKGMVACELMLASIPQRAKKNNPFLLAVNDKTVERLTYLPDALPNLDRQALIQNEDETLLRKVIYDAEVKRVKHKIASETEALEAALQEKQQDMTDKLAELSDAFKSTQDKITASTTELESSIKRNEELNNDNHRLNLKIQESKAELDVIIEKSRKVEESMARKVEKLTDFIKEKAIFLKSFEFLDEEDFDFFVGSPLSNKERGEHISFSQALYSNYSDAVSYIQAYLKERDILYPRHIIENFLTLIRTNDLIILAGDSGSGKTNLVQSFAKAIGGVSKIIPVKPNWTSSEDLLGYYNPLEKKYLA…	BBD70_24445	gb|EDB6071596.1|	METPFVIKFIETKWHDKQTLVSVSESEYSLKLEQTGNNAFSAHTTIYPKVDELRFAQLAIKTKQGDQSPPYIVMPNGDRKQLESITDPASNAVWWVEPAHWDAKQRVWRSEARRTAGQITFVIGNSTLKLDIDISEQTKSDLSRYLSDFKADLWELILDENSHITGDAKNSQVAAIDQEALSLVASILSNAQTILKKPKVELKEIQALKPAKEVRPVPRTFMEICTKGSRKHLTSRASEPSYNVPENQYVLYVVSSTLSIVKQLVKVAESKKSRFSGAIEKLNERLDSLKDYRIINRDLVVKDLERLKKRFDTEVINAELASQLGEINANKYFSTNHAAKGYLRLEKTTGSENEWWAKIKPSQHDDWQQFELDGYTIFSSGEYYASLFQPYSDYDMVAI…	Salmonella enterica subsp. enterica serovar Senftenberg	Gammaproteobacteria
Gammaproteobacteria	Salmonella enterica subsp. enterica serovar Worthington	AANYXA010000032.1	A0F76_004586	gb|EDS8949442.1|	MALEQVIYNLEEVKGLSDEELYQRLYDSWGLENHKIDVWGELSINVAGNWAGIRNAKTLSGNQSIEYPLADSHELQSGVFLTPSVAKIVLGNDTKGMVACELMLASIPQRAKKNNPFLLAVNDKTVERLTYLPDALPNLDRQALIQNEDETLLRKVIYDAEVKRVKHKIASETEALEAALQEKQQDMTDKLAELSDAFKSTQDKITASTTELESSIKRNEELNNDNHRLNLKIQESKAELDVIIEKSRKVEESMARKVEKLTDFIKEKAIFLKSFEFLDEEDFDFFVGSPLSNKERGEHISFSQALYSNYSDAVSYIQAYLKERDILYPRHIIENFLTLIRTNDLIILAGDSGSGKTNLVQSFAKAIGGVSKIIPVKPNWTSSEDLLGYYNPLEKKYLA…	A0F76_004587	gb|EDS8949443.1|	METPFVIKFIETKWHDKQTLVSVSESEYSLKLEQTGNNAFSAHTTIYPKVDELRFAQLAIKTKQGDQSPPYIVMPNGDRKQLESITDPASNAVWWVEPAHWDAKQRVWRSEARRTAGQITFVIGNSTLKLDIDISEQTKSDLSRYLSDFKADLWELILDENSHITGDAKNSQVAAIDQEALSLVASILSNAQTILKKPKVELKEIQALKPAKEVRPVPRTFMEICTKGSRKHLTSRASEPSYNVPENQYVLYVVLSTLSIVKQLVKVAESKKSRFSGAIEKLNERLDSLKDYRIINRDLVVKDLERLKKRFDTEVINAELASQLGEINANKYFSQNHAAKGYLRLEKTTGSENEWWAKIKPSQHDDWQQFELDGYTIFSSGEYYASLFQPYSDYDMVAI…	Salmonella enterica subsp. enterica serovar Worthington	Gammaproteobacteria
Gammaproteobacteria	Shigella boydii	NIYW01000162.1	CEG99_25070	gi|1241328825|gb|PAY94792.1|	MALEQVIYNLEEVKGLSDEELYQRLYDSWGLENHKIDVWGELSINVAGNWAGIRNAKTLSGNQSIEYPLADSHELQSGVFLTPSVAKIVLGNDTKGMVACELMLASIPQRAKKNNPFLLAVNDKTVERLTYLPDALPNLDRQALIQNEDETLLRKVIYDAEVKRVKHKIASETEALEAALQEKQQDMTDKLAELSDAFKSTQDKITASTTELESSIKRNEELNNDNHRLNLKIQESKAELDVIIEKSRKVEESMARKVEKLTDFIKEKAIFLKSFEFLDEEDFDFFVGSPLSNKERGEHISFSQALYSNYSDAVSYIQAYLKERGILYPRHIIENFLTLIRTNDLIILAGDSGSGKTNLVQSFAKAIGGVSKIIPVKPNWTSSEDLLGYYNPLEKKYLA…	CEG99_25065	gi|1241328824|gb|PAY94791.1|	METPFVIKFIETKWHDKQTLVSVSESEYSLKLEQTGNNAFSAHTTIYPKVDELRFAQLAIKTKQGDQSPPYIVMPNGDRKQLESITDPASNAVWWVEPAHWDAKQRVWRSEARRTAGQITFVIGNSTLKLDIDISEQTKSDLSRYLSDFKADLWELILDENSHITGDAKNSQVAAIDQEALSLVASILSNAQTILKKPKVELKEIQALKPAKEVRPVPRTFMEICTKGSRKHLTSRASEPSYNVPENQYVLYVVLSTLSIVKQLVKVAESKKSRFSGAIEKLNERLDSLKDYRIINRDLVVKDLERLKKRFDTEVINAELASQLGEINANKYFSQNHAAKGYLRLEKTTGSENEWWAKIKPSQHDDWQQFELDGYTIFSSGEYYASLFQPYSDYDMVAI…	Shigella boydii	Gammaproteobacteria
Gammaproteobacteria	Mixta theicola	NWUO01000018.1	COO59_18400	gi|1333711415|gb|PNS10297.1|	MSNKVYGYSELEGLSDTELLATLQSSWGFEDDNFEVWGEITLIKDRGWGHLKNPRMLTSNKLLSYPLTGVNGPCQFWINPVDGKKYGDQRRARFIKCKLTLSSLKERERHRIPFMMSVMPGSCSSLEKLPVSVPHDIVTADDVSYFIANEIYHFYQQQAATKIEQEFATKQSTLDQQLAEALAEKQSAELKRDNAIKLVESLNSIRKKTEQSIALLETDNELKQKKFQMTLESFKKIEVEMNHKILRLKKYVSDKALFLKTFEFLDQEDLDNFLVDSKSASQGVDGVVFREQLNGDYSQAISYIQSHLVEKDVLYPRHIIENYLTLLRTKDLIILAGDSGSGKTNLVKSFAKAVGGKAVIIPVKPNWTSSEDLLGYYNPLEKKYLATPFLDALLEAQLN…	COO59_18395	gi|1333711422|gb|PNS10304.1|	MPVEYNDEHAHFECETTIYPRTEGVLRGQLAVRFITGSAVIPCIKMSDGAEKPLSPVEDIDSGKNWWIVKDSWDAKEKYWRHSSVNTAGTLILVLDDVHCHINIGSMDFSRDQLERYLTGFKDDLWELLLDESSSVQASREQGGIGINNATIDCAQNIIMHAHKILSNPKAELREIQTLKPRKAVKPVNRTFMELATKTNQSVLTSRAVKPTFNMAENRYILFALERSYRMIKQIVILSGNKAKRYATLTDKLQHQYDSFTDSVTIDRDLVVKDLEIIRQRCKLSYWQQQLAQSFIAEKIVYDADGPQYNVLHFRSQKPTKENDGFFIEINVQGQWMRDSEKSTVLSFNSKFNASLLNLVRCLRQHAEYKITGAGRRYETEKAVIYVIDYLNDIEIVDA…	Mixta theicola	Gammaproteobacteria
Gammaproteobacteria	Pantoea vagans	CP011427.1	LK04_01795	gi|972387484|gb|ALV90954.1|	MALEQVIYDPEEVKGFSDEELYRRLCESWGSTSGKLAVWGKIKNRTNFDDRKLPTLLLDIKSLQTGLHLEYPINVRLAMVKGVFISFKSVEELFGIDDESFISCELALAPQSEREKHENPFECNVVVSSVRRLIKLPEYRANDIINGDESIFLDDAVYKLHLQNVQSRIDGEVSALKAEFEREESSLKAQISSYEVLLQQTQEELNKNNNILSQARVKTQELEEKNTEWLRKIALQKKVEETMSKKIERLKAYVESKALFLKSFEFLDDEDFDIFVGNRSSAAQQGKHISFSQTLDSKYSNAVSYIQAHLKERDILYPRHIIENFLTLIRTNDLIILAGDSGSGKTNLVQSFAKAIGGVSKIIPVKPNWTSSEDLLGYYNPLEKKYLATPFLEALIEAK…	LK04_01790	gi|972387483|gb|ALV90953.1|	MDVPFIIKFIETKWHDKQTLVSVNESEYSLKLEHLGNNTFSAHTIIYPKVEELRFAQLAIKAKHGDKSPPYIAMPNGERKPLESIIDPASNSVWWVEPAHWDKKQRVWRSEARRTAGQITFVVGNSTLKLDIDISEQTKSDLSRYLSDFKADLWELILDENSHITGDAKKSLVATIDQKALSLVASILTNVQTILKKPKVELKEIQELKPTKEVRPVPRTFMEICTKGSRNHLTSRASEPSYNVPENQYVLHVVSNTLNIVKKLVRVAESKKSRFSDAVDKLNERLESLKNYRSINRDLVVKDLERLKKLFDTKEINKELANKLDEIKTNMYFSQNIAAKGYLRLEKATGSENEWWAKIKPQLSDDWQQFEQDRYTIFSSGSPYSSLFKPYSDYEMEAI…	Pantoea vagans	Gammaproteobacteria
Gammaproteobacteria	Edwardsiella piscicida	CP047672.1	GT752_17430	gi|1803116800|gb|QHR96947.1|	MALEQVIYNLEEVKGLSDEELYQRLYDSWGLENHKIDVWGELSINVAGNWAGIRNAKTLSGNQSIEYPLADSHELQSGVFLTPSVAKIVLGNDTKGMVACELMLASIPQRAKKNNPFLLAVNDKTVERLTYLPDALPNLDRQALIQNEDETLLRKVIYDAEVKRVKHKIASETEALEAALQEKQQDMTDKLAELSDAFKSTQDKITASTTELESSIKRNEELNNDNHRLNLKIQESKAELDVIIEKSRKVEESMARKVEKLTDFIKEKAIFLKSFEFLDEEDFDFFVGSPLSNKERGEHISFSQALYSNYSDAVSYIQAYLKERDILYPRHIIENFLTLIRTNDLIILAGDSGSGKTNLVQSFAKAIGGVSKIIPVKPNWTSSEDLLGYYNPLEKKYLA…	GT752_17435	gi|1803116801|gb|QHR96948.1|	METPFVIKFIETKWHDKQTLVSVSESEYSLKLEQTGNNAFSAHTTIYPKVDELRFAQLAIKTKQGDQSPPYIVMPNGDRKQLESITDPASNAVWWVEPAHWDAKQRVWRSEARRTAGQITFVIGNSTLKLDIDISEQTKSDLSRYLSDFKADLWELILDENSHITGDAKNSQVAAIDQEALSLVASILSNAQTILKKPKVELKEIQALKPAKEVRPVPRTFMEICTKGSRKHLTSRASEPSYNVPENQYVLYVVLSTLSIVKQLVKVAESKKSRFSGAIEKLNERLDSLKDYRIINRDLVVKDLERLKKRFDTEVINAELASQLGEINANKYFSQNHAAKGYLRLEKTTGSENEWWAKIKPSQHDDWQQFELDGYTIFSSGEYYASLFQPYSDYDMVAI…	Edwardsiella piscicida	Gammaproteobacteria
Gammaproteobacteria	Morganella morganii	MZNC01000014.1	B5S45_11750	gi|1160062174|gb|OPL24633.1|	MVSEKVIYDFDEVKGLSDEELYQRLYDSWGLKNHKIEVWGELSINDAGNWAGIRNAKTLNGNQSIEYPLTDSHDLQSGVFLSPSVAKIVLGNDTKGMVACELMLASIPQRAKKNNPFLLAVNDKTVERLTYLPDALTNLERQPLIHHENETLIRKVIYDAEIRRVKYKIASETEALEAALQEKQQNMANKLAELSDIFKSTQDKITISKTELESSIKRNEELNNDNHRLNLKIQESKAELDVVIKKSRRIEESMTRKVEKLTEYIKEKAIFLKNLEFVDDEDFDFFVGNTLSNQQRGEHISFSKSLDSNYSYAVSYIQAHLKERDILYPRHIIENFLTLIRTNDLIILAGDSGSGKTNLVQSFAKAIGGVSKIIPVKPNWTSSEDLLGYYNPLEKKYLT…	B5S45_11745	gi|1160062173|gb|OPL24632.1|	MEAPFVIKFIETKWHDKQTLVSVSESEYSLKLEQTGNNAFSAHTTIYPKVDELRFAQLAIKTKYGDHSPPYIAMPNGQRRQLESIIDPASNTVWWVEPAHWDEKRRVWRSEARRTAGQIMFVIGNSTLKLDIDISEQTKSDLSRYLSDFKVDLWEMILNENSHITGEAKNSQVAAVDQRTLSLVASILSNAQTIIKKPKVELKEIQTLKPVKEVRPVSRTFTEIYAKGLRKHLTSRVSEPSYNVPENQYVLYVVSTTLNIVKQLVRVAESKTSRFSGAVEKLNERLGSLKDYRLINRDLVVKDLERLKKRFDTDAINDDLADKLAEINANKYLSPNLAAKGYPRLYLRLEKATGSENEWWAKIKPSLSADWQQFEQDGYTIFSSVGPYATLFKPYSDYE…	Morganella morganii	Gammaproteobacteria
Gammaproteobacteria	Serratia marcescens	VOMJ01000041.1	FR965_13200	gi|1721121668|gb|TWY29688.1|	MSNKVYEYSELEGLSDTELLATLQSSWGYEDDNFEVWGEVTLFKDREWGHLKNPRMLASNNLLSYPLTGVNGPCEFWINPADAKKYGDQRGARFIKCKLTLSRPKEREKHRIPFMMSVLPGSCSSLEKLPASVPHDIVTADDVSYFIANEIYHFYQQQAATRIEQEFATKQSMLDQQLTEALAEKQSAELKRDNAIKLVESLNSMRKKTEQSIALLETDNELKQKQLQITLENFKKIEVEMNHKILRLKKYVSDKAFFLKTFEFLDQEDLDNFLVESKSASQDVDGVVFREQLNGDYSQAISYIQSHLIQKDILYPRHIIENYLTLLRTKDLIILAGESGSGKTNLVKSFAKAVGGKAVIIPVKPNWTSSEDLLGYYNPLEKKYLATPFLDALLEAQLN…	FR965_13195	gi|1721121667|gb|TWY29687.1|	MTSTFEIKYIEIQWYDKDTVTKVTESLHVIPVEYNDEHSHFECETTIYPRTEGILRGQLAVRFIAGPAVIPCIKMSDGAEQQLFPVEDIDSGKTWWIVQDSWDAKEKYWRHSSVNTAGTLILVLDDVHCYINIGSMDFSREQLERYLAGFKDDLWELILDESSSVQASREQGSIGINNATIDCAQNIIMHAHKILSNPKAELREIQTLKPRKAVKPVNRTFMELATKTNQSVLTSRAVTPTFNMAENRYILFALERSYKIIKQIVILSGNKAKRYAALTDKLQQQYDSFTDSVTIDRDLVVKDLEIIRQRCKLSYWQQQLAQRIFSEKIVYDADGPQYNVLHFRSQKPTQENDGFFIEINVQGQWKKDNEKSTVLSFNSKVNESLLNLVRCLRQYAEYK…	Serratia marcescens	Gammaproteobacteria
Gammaproteobacteria	Wohlfahrtiimonas chitiniclastica	NEFE01000001.1	B9T18_01870	gi|1231311142|gb|OYQ76130.1|	MTTIMDLTSEQLWQFSDDQLIEILRKEWGYSKGEPFEVIGQIQPINHFWILDPFYHRSGEHLLSYPNLDDTKPIRNTIYIGSINTSVSKNQWVKIRVELSPLRERKKHENPFDLCAVSNSLTVLEVIPEMATSRENISQDTISQFLSIDGQHYVEKCVLDYYTQKNQEEIKKQTSNFENQLKNDFESQERLIQQLKTDFSELDTKYKRKNTSFKNLKIKVSETSEKLEKLEAHYINQQIQMENQLNTLNNFIEKQATILSDLELISQDELNQILGTPSSQNLSPSHHFINDFDGSLPNAIKYIQAYLFKQGIIYQQSVLEDFCALLMTHDLIILAGDSGSGKTNLVKSFAKAVNGRAVIIPVKPNWTSAEDLLGYYNPLEQKYLSTLFLDTIIEANKNP…	B9T18_01865	gi|1231311141|gb|OYQ76129.1|	MIDIRYIEISCDENQNINQVTTSDEPIEIQKRSDGLFIETIVFPKIYHYLGFCISDEEVTETPYFQLTNGKKEELFPIKVPGKKVTWWIQNSGWDAINNRFYSEIFRTVGRYKLFIQNQVIEIENESFDLSLQDLEYYLNDFKNGLWNLILNHSSAASAYMSSGNGTINNTFLDLISNFIDHTYKIIANPSAELHEIQANKPIRSVKPIPATFRELALRPNRKNVISRSFTESYNTTENRFIHYCVNRIYFLLKSLQRISEAQNQQLQHKIIQEKEYLSQLQSMTHKIIDPIVYDNEIKKLENDLSVLNQKIALMKNNLILGAYPAFSNTKEQIPGKCIIQLSTKHAHNQNQFFCQKFNHVNPQEQFSSYMVIEFPDELIYNLDLEYTTLRIYGAFTKS…	Wohlfahrtiimonas chitiniclastica	Gammaproteobacteria
Gammaproteobacteria	Halomonas meridiana	CP024621.1	CTT34_13775	gi|1792545881|gb|QHD51603.1|	MDRELPSFLWLESELLEYLAQAWDQQDPLHIKVIGRLQQADKGSFGFLEDLHHPETGIRLFYPLKGSKVNPNVFVPPDELTAFQKQWENETYALAELDLSPLQKRKDRDDPFACIVRTSTLEPLSHIPESWWKIHNIQSDPMPIVLAKARKAIEDLLRRETSEAEDELRVLRSALESAVLEKNSLNDECKQIDIEVRQQVKRIAALEAEFVQRRNELEKKFRELELFLKESGKRMVALDLVDSSDLEKLFPPINTQDAREGHSFQKALSGDFQSLASYIQAHLWRKGIHYTRAQLLDYFTLLRTNDLIVLAGDSGSGKTSLVKSVASAIGARCTVVPVKPNWTGSEDLLGYYNPIEQRYQPSQFLVALLDAAREPEIPHFICLDEMNLARVEYYFADFL…	CTT34_13780	gi|1792544953|gb|QHD50675.1|	MQDEIEVRYLMIEWQSKGIARTIEAASVPLELEPLIDGKIVVESTIFNDFHPWLGIRLGKKLDSQVPTFVTASGQATPMMRVLDPLGRGYWWLRNDGWDYVGKRHLSELQRSPGTYNIQVGDITLQVENRLSAFGRADIQAYVDDFRGNLLWMIINNCADATAAGRGTGPGTELADAVKELHNASYKVLASPAVTIHEGQAQQPVSKVRPNATSFREYARNPIARQLTSRVFESSADIAENRYLRHMLSVSINISKAYVSASSQQSDFLEKLATQESGRAQHNREMEGRTVDPVVFDQQTEEITRKLHEIANFRYITDGNVNPVGEFPITLSGRYYEKYSYYYAPQESTSRNVDNSVDYRVVVLPAGLFELVSGIQHLCKSFTITGSVESCVRYTNSGK…	Halomonas meridiana	Gammaproteobacteria
Gammaproteobacteria	Bacterioplanes sanyensis	CP022530.1	CHH28_10015	gi|1226116798|gb|ASP38991.1|	MSLEQVTYDLDEVEGLSDEELYQRLYESWWVSNGKLEVWGKIQNGRDFVDRKNPTRLFEIKSLQTGLEAEYPINARFPMSKGIFVSFKSVEELFDIEDGSFVSCELTLAPREEREKHENPFECNVKVSSVRRLVKLPKYTANDIIIGDENIFLDNAVYDLHYQNVRSKIDSEESALRERLEREVSSLNGQISLHQNQLKQTQDELSQKNNVLSETIEKFYKLEGEHSEWQQKIALQKKMEEAMSKKIERLQAYVESKARFLKSFEFLDDEYFDSFVGSCSGSERKGEIISFSQALDSSYADAVSYIQTHLKERDVLYPRYIIENYLTLIRTNDLIILAGDSGSGKTNLVQSFAKAIGGVSKIIPVKPNWTSSEDLLGYYNPLEKKYLATPFLEALNEAK…	CHH28_10020	gi|1226116799|gb|ASP38992.1|	MEAPFIIKFIETKWHDKQTLVSVSESEYSLKLEQVGNNAFSAHTTIYPKVDKLRFAQLAIKTKNGDQSPPYIAMPNGERRQLESITDPASNEVWWVEPAHWDAKQRVWRSEARRTAGQITFVIGTSILKLDIDISEQTTSDLSRYLSDFKADLWELILDENSHITGEAKNSQVAAVDQEALSLVSSILTNAQAILKKPKVELKEVQALKPVKEVRPVPRTFMEICTKGSRKNLTSRASEPNYNVPENQYVLYVVSSTLSIVKQLVRVAESKKNRFSGAFEKLNDRLSELKGYKKVNRDLLVKDFERLKRICDVDFISDGLNKELAFVNAENEFSSLQVIDIYIRVKGAAKEIDGWFVEFKYSPGEAWRSCEDGKKTILKPLPPYFCLFKKGLDYKVRAN…	Bacterioplanes sanyensis	Gammaproteobacteria
Gammaproteobacteria	Marinomonas fungiae	CYHG01000005.1	Ga0061065_105269	gi|973989959|emb|CUB04171.1|	MEDMSLNYDKNYAEGLDDEALYKCLYEAWGIQDRRIRVWGRLEVNAQGNWSGIKQAKLLQTNEPIEYPLPNSGELQSGVFLSPNNARTLLNGKNSVFIRCELTLASHQQRQHKDNPFLLSIKPDSVELLTELPKFSTDEVMHSDLSTFISDHIYRHFLTTLENETREAEEKARYKIEQIEAEYEELRQSLTDQTEDIDSELTTLKTEREALQGRLSEFEAKQKIVKNNIELEQSALNAIIEKQQQIEGEMSKKIERLKQYVEEKAGFLKDFEFIDEDVYAELSGEKQVGENVVGGLSFVDDFESDYSQLTSYLQAYLREQGQYYSRHIIENYLTLIRTNDLVILAGDSGSGKTSLVQSFAEAVGGVAKIIPVKPNWTSSEDLLGYYNPLEKKYLATPFL…	Ga0061065_105268	gi|973989958|emb|CUB04170.1|	MSTAGFEVRYIETRWHDKSTLLELIESQYALPLEEESSGGYVACTTIYPKVDELRFSQLAITYNDRGSTSPPVILASDGTIIPLKKVVHPETGKQWWIEPGEWNPKSKAWVTNTHRTAGIISFQIGKQRLDLHITLTDSSKEQLDKYLIDFKSDMWELVLDESSYIQAEAKQGMIGSVDESTLSLVGSIWSYGRNVLKKPKSELRETQVLKPRMAVKPVPRTFMEIATKGSTKQLTSRSTKPNFNVAENSYLLYALLSTHRIVSQLCRVSQSKTERLANNLSKLDERLASLKDYKTVNRDLVVKDYKKAKLEQDLNHINVELERELLEINSGASSHGVTGYLRIQKQSQYGSHFCLCKFEEAQEWKPLPGFKYSSIELDGRYKALFQAYTDYKLTADMS…	Marinomonas fungiae	Gammaproteobacteria
Gammaproteobacteria	Acinetobacter pittii	SGTP01000004.1	EXD90_08245	gi|1575333014|gb|RZH60553.1|	MNEKIYTKEELKGLSEDEILALLAESWGVQDGKIEIWAELPPLGESTYGFILEPHSVLTGERLYYPLKGLDRGNCKIFVSSKDAVRLGDKRKRCYVRCEVELSPESERIKHDNPFELTLKKGSGENLLYLPKEIPHEILINPSLNAERSQFISKAIYDFYHEKAMGDIDKEVKQKQSEIETQISARETEFQQLNEKGLAELELTKEQRDKVKNLLDELNAQKVKLELVNEKLSQDKQLRLNEIKSLTRRFDQIEAKMNNKIQRLKSYVADKAHFLKTFEFVDEDDIDLFLNQSKPLIERVDGLSFNEDLDGDFQKAVSYIHAHLVDMEYMYPRHVVENYLTLLRTKDLIILAGDSGSGKTNLVKSFAKAVGGKSIIIPVKPNWTSSEDLLGYYNPLEKK…	EXD90_08240	gi|1575333013|gb|RZH60552.1|	MMDLYFEIKYLELKWYNQDILTKVKESLVPLSIEYNEHLGIHQVETTIYPKVEGVKRGVLAVRFLNQTSDKPYVELPNGEKKYLSSIKDPETGLEWWFLKERWVEDLNHWSSIAPNIAGMVRLVLQGKICKVLINGSDFTLEQLERYLKVFKNDLWELILDESSVVQGKAKGGQIEGIGEEAIKCIESLVAHAHKVLINPKVELREIQSLKSRKEVRPVNRTFMEISTKANQKYLTSRATESSYNVPENRYVLFALERCYRIIKQIVILAGNKMERFKLQADKLRAQHDALKDHSKVDRDLVVADLRRIGQRGKKEYWQSHIDTLVAHYKILLSDEPLSEKLRIKIEGATHRGDGFFFQIWTNDRYKKPVDRYYVLALGGEFEGLLKVIETGMELEFDC…	Acinetobacter pittii	Gammaproteobacteria
Gammaproteobacteria	Acinetobacter gyllenbergii	CP041971.1	FPL18_16310	gi|1797094308|gb|QHH95277.1|	MNEKIYTKEELKGLSEDEILALLAESWGVQDGKIEIWAELPPLRESTYGFILEPHSVLTGERLYYPLKGLDRGNCKIFVSPKDAVRLGDKRKRCYVRCEVELSPESERIKHDNPFELTLKKGSGENLLYLPKEIPHEILINPSLNAERSQFISKAIYDFYHEKAMGDIDKEVKQKQSEIETQISARETEFQQLNEKGLAELELTKEQRDKVKNLLDELNAQKVKLELVNEKLSQDKQLRLNEIKSLTRKFDQIEAEMNNKIQRLKSYVADKAHFLKTFEFVDEDDIDLFLNQSKPLIERVDGLSFNEDLNGDFQKAVSYIHAHLVDMEYMYPRHVVENYLTLLRTKDLIILAGDSGSGKTNLVKSFAKAVGGKSIIIPVKPNWTSSEDLLGYYNPLEKK…	FPL18_16305	gi|1797094307|gb|QHH95276.1|	MMDLYFEIKYLELKWYNQDILTKVTESLVPLSVEYNEHLGIHQVETTIYPKVEGVKRGVLAVRFLNQTSDKPYVELPNGEKKYLSSIKDPETGLEWWFLKERWVEDLNHWSSIAPNIAGMVRLVLQGKICKVLINGSDFTLEQLERYLKVFKNDLWELILDESSVVQGKAKGGQIEGIGEEAIKCIESLVAHAHKVLINPKVELREIQSLKPRKEVKPVNRTFMEISTKANHKFLTSRATEPSYNVPENQYVLFAFERCYRIIKQIVILAGNKMERFKLQADKLRAQHAILKDHSKVDRDLVVADLRRIGQRGKKEYWQSHIDALVAHYKIPLSDAPLSKKLRIKIEGATYRGDGFFFQIWINDQYKKPVDRYYVLALGGEFNDLLKVIETGMELEFDC…	Acinetobacter gyllenbergii	Gammaproteobacteria
Gammaproteobacteria	Acinetobacter johnsonii	NEWE01000012.1	CAI22_15420	gb|NKG39074.1|	MNEKIYTKEELKGLSEDKILALLAESWGVQDEKIEIWAELPPLGESTYGFILEPHSVLTGERLYYPLKGLDRGNCKIFVSPKDAVRLGDKRKRCYVRCEVELSPESERIKHDNPFELTLKKGSGENLLYLPKEIPHEILINPSLNAERSQFISKAIYDFYHEKAMGDIDKEVKQKQSEIETQISARETEFQQLNEKGLAELELTKEQREKVKNLLDELNAQKVKLELVNEKLSQDKQLRLNEIKSLTRRFDQIEAEMNNKIQRLKSYVADKAHFLKTFEFVDEDDIDLFLNQSKPLIERVDGLSFNEDLNGDFQKAVSYIHAHLVDMEYMYPRHVVENYLTLLRTKDLIILAGDSGSGKTNLVKSFAKVVGGKSIIIPVKPNWTSSEDLLGYYNPLEKK…	CAI22_15415	gb|NKG39073.1|	MMDLYFEIKYLELKWYNQDILTKVTESLVPLSVEYNEHLGIHQVETTIYPKVEGVKRGVLAVRFLNQTSDKPYVELPNGEKKYLSSIKDPETGLEWWFLKERWVEDLNHWSSIAPNIAGTVRLVLQGKICKVLINGSDFTLEQLERYLKVFKNDLWELILDESSVVQGKAKGGQIEGIGEEAIKCIESLVAHAHKVLINPKVELREIQSLKPRKEVRPVNRTFMEISTKANQKYLTSRATESSYNVPENRYVLFALERCYRIIKQIVILAGNKMERFKLQAEKLRAQHDALKDHSKVDRDLVVADLRRIGQRGKKEYWQSHIDTLVAHYKIPLSDEPLSEKLRIKIEGATHRGDGFFFQIWSNDRYKKPVDRYYVLALGGEFEGLLKVIETGMELEFDC…	Acinetobacter johnsonii	Gammaproteobacteria
Gammaproteobacteria	Acinetobacter junii	RHXG01000080.1	EGT69_16670	gi|1534110517|gb|RSE23619.1|	MENQITYTLQQLKNLNDDQIFLELKKIWGYKENESLRVIGQINRKSNFSQIYTLSNLKDSKGNSLLYPLENFKEDHGCFIGLSLPNTVEIGQWVQATLKLAPKKEREKHSNPFELNVQISSLKKLVEIPSKVIEDGIHDDLIENWVIEYFAEKNAEEITEKNKSVLMQHEILLKKEEELEKNLKSLEKKEISFLDKLAKNQEKIELCKLELEENKELVNAEKVELKKNKDLIIQAQAELISLKHQKEEILNKLNNFIEEKVNILRELEIIDEDSLHKLIGKNNTPVQLETHYLLGKDIKDIEEVIKHIQAYLYNKGTMYRRNILENFYTLLSTRDLIILAGDSGAGKTNLVKSFAEATGGKHYIIPVKPNWTSSEDLLGYYNPVEQNYLSTPFLTALID…	EGT69_16665	gi|1534110516|gb|RSE23618.1|	MMLISARYIDVEWNATKQVKKVFYGSPIEIIKKSENNFFIETITFPKRFFYFAFRIEEPISNPPYFLFNEIKEDLLEIIDPKTGENWWIAKGRWISESKKRNYGNKYVHESFRTAGRLELHINDITIEISNRTNNFSVEEMEFFLTDFKNELWSIILNSESVVNAELQKSTPNIFNEDTILYVENCLNSVQKILNDPKFFLVENQQLVIKKKVKPVRRTFRELTTKPNSKTFTSRIHDKSYNNSENRYIHFCTEKLFFIFNKMLQVVERSNIQFSNMAKIYFEESDRLKNSDFKIIDKDLFIQEAYEIKQRSLNFYTELEKLNNNLLPSFLDEILKLNSKILNRNESGNEKLITYRFTLDQIFEYLDHSIQSRFLNGKEFETHPEYHIYNGKYLVVEFP…	Acinetobacter junii	Gammaproteobacteria
Gammaproteobacteria	Acinetobacter radioresistens	CP038022.1	E3H47_06895	gi|1654714805|gb|QCS12263.1|	MNEKIYTKEELKGLSEDEILALLAESWGVQDGKIEIWAELPPLGESTYGFILEPHSVLTGERLYYPLKGLDRGNCKIFVSPKDAVRLGDKRKRCYVRCEVELSPESERIKHDNPFELTLKKGSGENLLYLPKEIPHEILINPSLNAERSQFISKAIYDFYHEKAMGDINKEVKQKQSEIETQISARETEFQQLNEKGLAELELTKEQRDKVKNLLDELNAQKVKLELVNEKLSQDKQLRLNEIKSLTRRFDQIEAEMNNKIQRLKSYVADKAHFLKTFEFVDEDDIDLFLNQSKPLIERVDGLSFNEDLNGDFQKAVSYIHAHLVDMEYMYPRHVVENYLTLLRTKDLIILAGDSGSGKTNLVKSFAKAVGGKSIIIPVKPNWTSSEDLLGYYNPLEKK…	E3H47_06900	gi|1654714806|gb|QCS12264.1|	MMDLYFEIKYLELKWYNQDILTKVTESLVPLSVEYNEHLGIHQVETTIYPKVEGVKRGVLAVRFLNQTSDKPYVELPNGEKKYLSSIKDPETGLEWWFLKERWVEDLNHWSSIAPNIAGMVRLVLQGKICKVLINGSDFTLEQLERYLKVFKNDLWELILDESSVVQGKAKGGQIEGIGEEAIKCIESLVAHAHKVLINPKVELREIQSLKPRKEVRPVNRTFMEISTKANQKYLTSRATESSYNVPENRYVLFALERCYRIIKQIVILAGNKMERFKLQADKLRAQHDALKDHSKVDRDLVVADLRRIGQRGKKEYWQSHIDTLLAHYKIPLSDEPLSEKLRIKIEGATHRGDGFFFQIWSNDRYKKPVDRYYVLALGGEFEGLLKVIETGMELEFDC…	Acinetobacter radioresistens	Gammaproteobacteria
Gammaproteobacteria	Acinetobacter radioresistens WC-A-157	ALIR01000017.1	ACINWCA157_1862	gi|400202996|gb|EJO33990.1|	MENQITYTLQQLKNLNDDQIFLELKKIWGYKENESLRVIGQINRKSNFSQIYTLSNLKDSKGNSLLYPLENFKEDHGCFIGLSLPNTVEIGQWVQATLKLAPKKEREKHSNPFELNVQISSLKKLVEIPSKVIEDGIHDDLIENWVIEYFAEKNAEEITEKNKSVLMQHEILLKKEEELEKNLKSLEKKEISFLDKLAKNQEKIELCKLELEENKELVNAEKVELKKNKDLIIQAQAELISLKHQKEEILNKLNNFIEEKVNILRELEIIDEDSLHKLIGKNNTPVQLETHYLLGKDIKDIEEVIKHIQAYLYNKGIMYRRNILENFYTLLSTRDLIILAGDSGAGKTNLVKSFAEATGGKHYIIPVKPNWTSSEDLLGYYNPVEQNYLSTPFLTALID…	ACINWCA157_1861	gi|400202957|gb|EJO33951.1|	MLISARYIDVEWNATKQVQKVFYGSPIEIIKKSENNFFIETITFPKRFFYFAFRIEEPISNPPYFLFNEIKEDLLEIIDPKTGENWWIAKGRWIPESKKRNYGNKYVHESFRTAGRLELHINDITIEISNRTNNFSVEEMEFFLTDFKNELWSIILNSESVVNAELQKSTPNIFNEDTLLYVENCLNSVQKILNDPKFFLVENQQLVIKKKVKPVRRTFRELTTKPNSKTFTSRIHDKSYNNSENRYIHFCTEKLFFIFNKMLQVVERSNIQFSNMAKIYFEESDRLKNSDFKIIDKDLFIQEAYEIKQRSLNFYTELEKLNNNLLPSFLDEILKLNSKILNRNESGNENLITYRFTLDQIFEYLDHSIQSRFLNGKEFETHPEYHIYNGKYLVVEFPD…	Acinetobacter radioresistens WC-A-157	Gammaproteobacteria
Gammaproteobacteria	Acinetobacter rudis CIP 110305	ATGI01000022.1	F945_01850	gi|514093928|gb|EPF73971.1|	MNEKIYTKEELKGLSEDEILALLAESWGVQDGKIEIWAELPPLGESAYGFILEPHSVLTGERLYYPLKGLDRGNCKIFVSPKDAVRLGDKRKRCYVRCEVELSPESERIKHDNPFELTLKKGSGENLLYLPKEIPHEILINPSLNAERSQFISKAIYDFYHEKAMGDINKEVKQKQSEIETQISARETEFQQLNEKGLAELELTKEQRDKVKNLLDELNAQKVKLELVNEKLSQDKQLRLNEIKSLTRRFDQIEAEMNNKIQRLKSYVADKAHFLKTFEFVDEDDIDLFLNQSKPFIERVDGLSFNEDLNGDFQKAVSYIHAHLVDMEYMYPRHVVENYLTLLRTKDLIILAGDSGSGKTNLVKSFAKAVGGKSIIIPVKPNWTSSEDLLGYYNPLEKK…	F945_01851	gi|514093929|gb|EPF73972.1|	MMDLYFEIKYLELKWYNQDILTKVTESLVPLSVEYNERLGIHQVETTIYPKVEGVKRGVLAVRFLNQTSDKPYVELPNGEKKYLSSIKDPETGLEWWFLKEHWVEDLNHWSSIAPNIAGMVRLVLQGKICKVLINGSDFTHEQLERYLKVFKNDLWELILDESSVVQGKAKGGQIEGVGEEAIKCIESLVAHAHKVLINPKVELREIQSLKPRKEVRPVNRTFMEISTKANQKYLTSRATESSYNVPENRYVLFALERCYRIIKQIVILAGNKMERFKLQADKLRAQHDALKDHSKVDRDLVVADLRRIGQRGKKEYWQSHIDTLVAHYKIPLSDEPLSEKLRIKIEGATHRGDGFFFQIWSNDRYKKPVDRYYVLALGGEFEGLLKVIETGMELEFDC…	Acinetobacter rudis CIP 110305	Gammaproteobacteria
Gammaproteobacteria	Acinetobacter schindleri CIP 107287	APPQ01000029.1	F955_02523	gi|480001246|gb|ENV43439.1|	MNEVIYTEDELNDYSDQELLGILAKSWGIDDGKFEVWGQLPPLGDTSFGFLRNPYLVKTGERLYYPILGHELEPCSFFVAPNDASRLGSKTKQRFVRCELELSPKSERLKHKNPMGLCVKKGSGENLRFLPKEIPQEILIDPHAENERSLFISKSIYDFYFEKAMGDMDKEIKQREDDIETQIAEKKSELQQLNENGIAELKQTEKQRDIAKNLLDKLNSQKQELENINEKLSQDKQLRQNELQNLTKRFEQIEGEMNNKIQRLKSYVADKAQFLKTFEFVDEDDLELFLVESKNQSQRMEGISFSDELNGDYHKSVSYIQAHLVEKDILYPRHIIENYLTLLRTKDLIILAGDSGSGKTNLVKSFAKAVGGKSIIVPVKPNWTSSEDLLGYYNPLEKK…	F955_02522	gi|480001245|gb|ENV43438.1|	MMMNPFFEIKYLELKWYDQETLTKVTESLLALDMEYEEQRQLFQIETTIYPKMVGISKGVLAVRFLDQHMDQPYIEITNGEKKYLSSIQDPETGFTWWIVKEQWIKEQNQWSSTTHNSVGTLRLILRGEVCEVAINGCDFTLEQLEQYLRSFKNDLWELILDDNNVVQASKEGEGIGFGEEVIACIDKLVDHAEKVLNNPKVELREVQSLKPRKSVKPVNRTFMELATKTNQRFLTSRATEPSYNVAENRYVLFALERCYRIIKQIVILAENKKQRLQHTMEKLKTQHDAFQDYVKVDRALFVSEFRKIEKRTSLEYWKVQLSQKIIESGVQFCSDPYKDVYFKLENTTTNFSNNESDGFFTYVWDGNNWIKPENKSGILKFHKKFSNLVHCFRSGMVL…	Acinetobacter schindleri CIP 107287	Gammaproteobacteria
Gammaproteobacteria	Pseudomonas fragi	NQKU01000016.1	CJU79_17625	gi|1236446896|gb|PAA37208.1|	MAHNATSRVSSDQESPSFAWSEADLLKFLAQAWDQHTPAHVKVIGRLRLAEGNSFGFLEGLHHAETGIKLGSPSSNSRVHQRVFVPGSEIKDFQSRWGSATYAVAELELSPLEERQKQDDTFTCKVRRGTLAALSHIPESWGVRSIDSESVPLIAEMARQAIDERLAGETVEVEEKLRSARSTLDEVTSEKRLFDDELVRVEREVEQGMDRIELLNAEYMKRREMLDKKARELEALLRERGERMVALDLVDRADLEKVFPPIGTPDAREGHFFQEALAGNLQRLTSYIQAHLWRKGIRYTRAHLLDFITLLRSNDLIVLAGDSGSGKTSLVKSVASAVGGRCTIVPVKPNWTGSDDLLGYYNPIERRYHPSQFLMALLDAAREPEIPYFICLDEMNLAR…	CJU79_17630	gi|1236446819|gb|PAA37131.1|	MLLEIEARYLTIDWRSEGVARAIEVAPVPLEIESLAEGGFIVESTIFNDFHPWLGIRLGSGFEEVVPVFVTAAGQEAPMLRVADQLGGGCWWLQHDGWDHFGKRHLSELQRSAGVYNFRIGDVMLQVENHLAAFGCADIQAYVDDFRGDLLWMIMNDTAGATAAGKGAGTGAEFIEALEKLHVASQRVLASPSVTIREGQAPQPIAKLRPNTASFREYARNPEARQLTGRVFNESADTAENRYLRYMLAVSLKVVDAYISAASLQSDFLDRLALQESERARRNREMKMRLVDPEVFDQQTEEIKRKLDALAGFKDLSGDEAGRVGRFPIRLGIRYFLEFSFYYTPQETVESNVASPVDYRVVVLPKDLFELILGAHHFCKDFTLTGCVESCVKTTSKGK…	Pseudomonas fragi	Gammaproteobacteria
Gammaproteobacteria	Pseudomonas lundensis	JAAQXW010000008.1	HBN80_14515	gb|NMZ55450.1|	MHNATSGVSSDQESPSLAWSEADLLKFLAQAWDQYTPAHIKVIGRLRLAEGDSFGFLEGLHHAETGIKLGSPSSNSRVHQRVFVPGSEIKDFQSRWGSATYAVAELELSPLEERQKQDDPFTCKVRRGTLAALSHIPESWGVRSIDSESVPLIAEMARQAIDERLAGETAEVEERLRSVRSTLEEVTSEKRLFDDELGRVEREVLQRMDRIELLDAEYMKKREVLDKKNSELEALLRERGERMVALDLVDRADLEKVFPPKGTPDVREGHLFREALAGNLQQLASFIQAHLWRKGIRYTRAHLLDFITLLRSNDLIVLAGDSGSGKTSLVKAVASAVGGRCTIVPVKPNWTGSDDLLGYYNPIERRYHPSQFLMALLDAAREPEIPYFICLDEMNLARV…	HBN80_14510	gb|NMZ55449.1|	MLPEIEARYLMIDWRSEGVARAIEVAPVPLEIESLAEGGFIVECTIFNDFHPWLGIRLGSGFEEVVPVFVTASGQEAPMLRVADQLGGGCWWLHHDGWDHFGKRHLSELQRSAGVYNFRIGDVMLQVKNHLSAFGCADIQAYVDDFRGDLLWMIMNDTAGATAAGKGAGTGAELIEALEKLHVASQRVLASPSVTIREGRAPQPVAKLRPNTVSFREYARNPEARQLTGRVFNESADTAENRYLRHMLAVSLKVVDAYISAASLQSDFLDRLALQESERTRRNREMKMRLVDPEVFDQQTEEIKRKLDAFADFKDLSGDEAGRVGRFPIRLGNRYFFEFSFYYTPQETVESNVASPVDYRVVVLPKDLFELILGTHHFCKDFTLSGCVESCVKLTSKGQ…	Pseudomonas lundensis	Gammaproteobacteria
Gammaproteobacteria	Pseudomonas endophytica	LLWH01000162.1	AQS70_09690	gi|940723832|gb|KQB53707.1|	MSVFVPPSELRTYLKTGQVDGFAVAELDLSPLIERTSRADPLACMVRPNTLEPLSHIPESWWHIQDIQSAPLPFIVTKVRDAVEDLVRRETAQAGEKLQAMREEVEATVDRKAVLDDEYRRIEVEIGQRTDRIAALEAEFAQRTSTLQNKFGELESFFRERGERMVALNLVDRADIEKVLPSQTTFDARNGYHFGKELEGSLERLASYIQAFLWRKGVLFTRAQLLDFITLLRTNDLIVLAGDSGSGKTSLVKSFAQAVGGRCTVVPVKPNWTGSDDLLGYYNPIERRYHPSQFLLALLEAAREPQIPHFICLDEMNLARVEYYFADFLSLLETRSQAPWIHLYSSTEERQAIVDNKIFLTLEEEARKRAGLGDDASFCEILMNDQANLELRRLAGFQE…	AQS70_09685	gi|940723831|gb|KQB53706.1|	MSLQIEVRYLMINWQSEGVARDIKAAPHALEIERDASGELSVESTVFNDFHPWLGIRLESALDNTIPVFVSASGEETPMLRIADQQGCGQWWLQHDGWDPLNKRHFSELHRSAGAYFIRLGNLRLRIENRLSSFGRADIQAYINDFRGDLLWMIMNDAAAATASGQGPGSGAELAVALKALNAASNRVLASPAVDIREGQAPQSIAKLRPNAATFHEYLRNPAARYFTGRVFNESADIPENRYVRHMLAVALKVAAAYMSAATLQTDFLRRLTSQEAERASRDSAIKSRAVDPEVFDHQTQDIARRLEALTCFTGPSTEYPDQIARFPIRLGKRYGDKCAFFYERQDGQQASGDAEIDYRVVVLPEDVFELILAAHHFCKDLTLAGCAQTSVKITSSGK…	Pseudomonas endophytica	Gammaproteobacteria
Gammaproteobacteria	Pseudomonas fluorescens	CABVHI010000074.1	PS676_05769	gi|1739458346|emb|VVN46264.1|	MTIDDMHFSGMSGNNEGDYTEPVPTLEWSDKDLRSYLAQRWQQQDSSSLRVIGRVSQVEGNKFGFLNELHHPDSGIRLPSAVANPGISMSVFVPPSELLNHLKAGQVDDFAIAELDLSPLSERKKRGDPLACMVRLNTLEPLSYIPESWWHIQNIQSASLPLIVTKVRDAIEDLVRRETAQAGDKLHGLRDAIEAAVQKKTVLDDEYMRTEHEVGERTDRIAALEAEFVQRKHTLQTRFGELESFFRERGERMVALNLVDRADMEKVLPPQAMLDAREGHYFGKELDGNLERLASYIQAFLWRKGVLYTRAQLLDFMTLLRTNDLIVLAGDSGSGKTSLVKSFAQAVGARCTIVPVKPNWTGSDDLLGYYNPIERRYHPSQFLLALLEAAREPEKPHFI…	PS676_05770	gi|1739458347|emb|VVN46267.1|	MSLQIEARYLMIDWQSERVAREIKMAPHALEIVRDANGGCFVESTVFNDFHPWLGLRFEPALEDAVPVFVSASGEETPMVRIADQLNGGHWWLQHNGWDRLNKRHLSELHRSAGAYIIRLGELTLQVVNRLSTFGRADIQAYIDDFRGDLLWMIMNDGAAATASGKGIGSGADLALALKALHVVSSRVLAYPAVNIREGQAPQSMAKLRPNTATFREYSRNPAARQLTGRVFNESADIPENRYLRHMLAVSLKVATAYMSAATLQSDFLERLASQEAERALRDQAMKSRPVDPKVFDHQTEEIKRRLDALAGFIGPFANEPGQTGHFPIRLSKRYSDKCAFFYERQDARQATVDTELDFRVVVLPEDVFELILAAHHFCKDLTLTGWAQSSLKTTISGK…	Pseudomonas fluorescens	Gammaproteobacteria
Gammaproteobacteria	Pseudomonas mandelii JR-1	CP005960.1	OU5_2667	gi|635287001|gb|AHZ69746.1|	MQQDGVSAASGEGYAEELPSLGWSEEDLRYYLAQVWGQRDPLHLRVIGRLQLAEGKTFGFLVDLHHAETGIRLPPPLKNASVRQSVFVPPSELSRIQKLGRIESFASAELDLSPLDERKKRGDPFGCMVHPETLEPLSHIPESWWSIKNIQSEAMPLVVTKVREAIEDRVQRETSEAGDKLLAAQLALEVAAQNKKLLDDEYGRIGLEVDQRMDRIAALDTEFVQRKNTLETRFRELEAFLQDRSERMVALNLIDRADLEKVFPLIGAPDTREGHRFREALAGNLQRLASYIQAFLWRKGILYTRAQLLDFITLLRTNDLIVLAGDSGSGKTNLVKSVASAVGGRCTIVPVKPNWTGSDDLLGYYNPIERRYHPTQFLLALLDAAREPEIPHFICLDEM…	OU5_2666	gi|635287000|gb|AHZ69745.1|	MPPEIEARYLTIDWQSEGVARAIEVAPVSLEIESRTDGEFVVESVIFNDFQPWLGIRVGPGFEEVMPVFVTALGQETPMLQVADPRGGGFWWLRNDGWDHAGKRHLSELQRSAGVYNIRIGDLTLRVENRLSTFGRADIQAYIDDFRGDLLWMIMNDSAGATATGKGAGAGTEFADALKELHTASHRVLASPAVNIREGQAQQPLAKLRPNTVTFREYARNPTARQLTGRVFNESADTAENRYLRHVLAVSLKVADAYVSAASLQSSFLDRLASQESERARRDREMEMRPVEPEVFDQQTEEIKRKLDALADFKSRSGHEADLVGRFPIHLGKRYFDHFAFYYTPQDAMASNVASPVDYRVVVLPKDLFELILGAHHFCKNFTLTGSVDSRVRDTSKGQ…	Pseudomonas mandelii JR-1	Gammaproteobacteria
Gammaproteobacteria	Pseudomonas helleri	WIWJ01000009.1	GHO40_07265	gb|MQT46527.1|	MVHEIVSETVKYAPDELIGKSDAELLSLLKKSWGYAADQPLTVIGKFTAGEGGQRPYFLTLLRSTNDSSRLEYPVDVYPISHRVYISPRDGSFLLERNEGAVYYTARVQLSPEIERERQRNRLTLQTVSGSLEALEELPFELGSKVMEEGKVFLEKSIVDFYRHKHRTQLEADFTLLKSELEQEQAHLDESVAQLKSDEKQISEQLDKKTRSLQQTQEQVQVQHQRLSVLTENYQTRKAVMDSQLARLNDFVRDKADTLLRLGFLDERDMQALLGEAQQHDATECHDFELVFGLDADAAIAHIQAFLHARGIYYRQALLKDFLALLRTQDLIVLAGDSGSGKTYLVKSFAQAIGGKAIVIPVKPNWTSTEDLLGYYNPLEKRYITTQFLDALIEAANNP…	GHO40_07260	gb|MQT46526.1|	MQPNLEFRNLDISWADAETLLKLESSSDALDAVESCGVYRVETTTFRRYQPWLGLRINEPLVHPPYCMLGSGGQIPLLPVKDPATRQIWWIHSTGWDEKNTRHLSEMYRTAGTVELVVQNRRYDLVVHTANFNVDELEYYLRDFKNELWMLILNEQSAIKGRTEQEVPNLYSDELVDRLKDFVEALEHIAKTPGVELKEIQALMPARSVRPINRTFMELATKGQSRFLTGRTFQESLNTPDNQHLHYCLSRVNYLVSRFREIGSARIRAFELAMASDLSRLQELAQTEFRVVDQTVFDNEIREIERELRRNENVFQDALSGQKECSVAGLRKGGCNIVLGKLFRNAETEFFCNQVNGRDYKKEISDGKYLTVKLPGSFASFAQKFQQSKFEFRVEGFYR…	Pseudomonas helleri	Gammaproteobacteria
Gammaproteobacteria	Pseudomonas reactans	JACAQP010000013.1	HX793_16380	gb|NWD31351.1|	MQQDGVSAASGEGYAEELPSLGWSEEDLRYYLAQVWGQRDPLHLRVIGRLQLAEGKTFGFLVDLHHAETGIRLPPPLKNASVRQSVFVPPSELSRIQKLGRIESFASAELDLSPLDERKKRGDPFGCMVHPETLEPLSHIPESWWSIKNIQSEAMPLVVTKVREAIEDRLQRETSEAGDKLLSAQLALEVAAQNKKLLDDEYGRIGLEVDQRMDRIAALDTEFVQRKNTLETRFRELEAFLQDRSERMVALNLIDRADLEKVFPLIGARDTREGHRFREALAGNLQRLASYIQAFLWRKGILYTRAQLLDFITLLRTNDLIVLAGDSGSGKTNLVKSVASAVGGRCTIVPVKPNWTGSDDLLGYYNPIERRYHPTQFLLALLDAAREPEIPHFICLDEM…	HX793_16385	gb|NWD31352.1|	MPPEIEARYLTIDWQSEGVARAIEVAPVSLEIESRTDGEFVVESVIFNDFQPWLGIRVGPGFEEVMPVFVTALGQETPMLQVADPRGGGFWWLRNDGWDHAGKRHLSELQRSAGVYNIRIGDLTLRVENRLSTFGRADIQAYIDDFRGDLLWMIMNDSAGATATGKGAGAGTEFADALKELHTASHRVLASPAVNIREGQAQQPLAKLRPNTVTFREYARNPTARQLTGRVFNESADTAENRYLRHVLAVSLKVADAYVSAASLQSSFLDRLASQESERARRDREMEMRPVEPEVFDQQTEEIKRKLDALADFKSRSGHEADLVGRFPIRLGKRYFDHFAFYYTPQDTMASNVASPVDYRVVVLPKDLFELILGAHHFCKNFTLTGSVDSRVRDTSKGQ…	Pseudomonas reactans	Gammaproteobacteria
Gammaproteobacteria	Stutzerimonas stutzeri	RHQZ01000018.1	EGI92_20105	gi|1533124647|gb|RRV76503.1|	MQQNELNAAGDEGSEQPLPSLTWSEMDLLKYLAQAWGQYDPSHIKVIGKLRLAEGGTFGFLEELHHADTGIRLHPPLENSRVSPTAFVPPSELLSFQRRFGGETFALAELDLSPLNKRKERGDPLACMVRTGTLEPLSQIPESWWGIQNIQSEAMPLVMAKARQAIEDRLNRETSEAEEKLRTAHSALEAAVSEKVSLDDEYGRITLEVGQRIERIAALEAEFVLRRNTLENRFRELEAFLRERGERMVALDLVDRADLEKVFPAIGSPDAREGHRFREDLGGDIQRLASYIQAHLWQKGIRYTRAQLLDFITLLRTNDLIVLAGDSGSGKTSLVKSVASAVGGRCTIVPVKPNWTGSEDLLGYYNPIERRYHPSQFLLALLDAAREPEIPHFICLDEM…	EGI92_20100	gi|1533124628|gb|RRV76484.1|	MSPEIEARYLTIEWQSEGVARAIEVSSVALEVESRADGRFAVESTIFNDFYPWLGIRLWLGDEEIVPTFVTVLGHETPMLRVADPRDGGFWWLQNDGWDHSGKRHFSELQRSPGTYNIRIGSAVLQIENRLSTFGRTDIQAYVDDFRGDLLWMIMNDAANATAAGKGIGTGAELAEALEELQAASQRVLASPAVTIREGQAPQPVAKLRPNVASFREYVRNPIARQLTGRVFDESADIAENRYLRHMLAVCLKMANAYVSAASQQMGFLDRLASQETERARRNREMEMRPVDPEVFDQQTKEIKWKLDALAALKDQPGDGADRVGRFPIRLGKRYGHGFSFFYTPQDDFGVKAEDKIDYRMAVFPEEFFEKILGCLHFCRNYTIIGSVESLLQKTNTGK…	Stutzerimonas stutzeri	Gammaproteobacteria
Gammaproteobacteria	Stutzerimonas stutzeri	RHRB01000026.1	EGJ07_19450	gi|1533106709|gb|RRV58786.1|	MQKNELIAAGEEDSKQAPPSFIWSEVDLRKYLAQAWNQHDPSHIKVIGRLRLAEGGSFGFLEDLHHADTGIRLPPPLENSRVSQTVFVQPSELRGFQKRWGGETFASAELDLSPLEERKKRGDPFACMVRTETLEPLSHIPESWWGIQNIQSEAMPLVVAKARKAIEDRLDRETSEAKENLRTALSALEAAVSEKKSLEDECGRITLEVGQRIERIAALDVEFLLRRNALENRFRELEAFLRERGERMVALDLVERTDLEKVFPPIGSSDAREGHRFREALGGDIQRLASYIQAYLWHKGIRYTRAQLLDFITLLRTNDLIVLAGDSGSGKTSLVKSVASAVGGRCTIVPVKPNWTGSDDLLGYYNPIERRYHPSQFLLALLEAAREPEIPHFICLDEM…	EGJ07_19455	gi|1533106672|gb|RRV58749.1|	MSSEIEARYLTIDWQSEGVARAIEVAPVPLEIESCTKGGFAVESTIFNDFHPWLGIRLGAGLEEMVPVFVTASGQETPLLQVADPRGGGFWWLRNDGWDHAGKRHLSELQRSPGIYNIRIGDVMLRVENRLCAFGRADIQAYVDDFRGDLLWMIMNDVAGATATGKGAGSGTELAEALAELHAASQRVLASPAVTIREVQAPQPIAKLHPNTSSFREYARNPAARQLTGRVFEESAETAENRYLRHMLRVSLKVADAYVSAASLQLGFLDRLASQERERARRNREMEMRAVDPEVFDQQTEDIKWKLDALADFKDLQGSARDRFGQISIRIGSRYYQDFSFYYSREGGNGSIADNDIDYRVVVLPKELFELILGCLHFCRNFTIKGNIDSRVEETARGK…	Stutzerimonas stutzeri	Gammaproteobacteria
Gammaproteobacteria	Stutzerimonas stutzeri	RHRP01000021.1	EGJ47_17745	gi|1533173720|gb|RRW24903.1|	MQKNELIAAGEEDSKQAPPSFIWSEVDLRKYLAQAWNQHDPSHIKVIGRLRLAEGGSFGFLEDLHHADTGIRLPPPLENSRVSQTVFVQPSELRGFQKRWGGETFASAELDLSPLEERKKRGDPFACMVRTETLEPLSHIPESWWGIQNIQSEAMPLVVAKARKAIEDRLDRETSEAKENLRTALSALEAAVSEKKSLEDECGRITLEVGQRIERIAALDVEFLLRRNALENRFRELEAFLRERGERMVALDLVERTDLEKVFPPIGSSDAREGHRFREALGGDIQRLASYIQAYLWHKGIRYTRAQLLDFITLLRTNDLIVLAGDSGSGKTSLVKSVASAVGGRCTIVPVKPNWTGSDDLLGYYNPIERRYHPSQFLLALLEAAREPEIPHFICLDEM…	EGJ47_17750	gi|1533173689|gb|RRW24872.1|	MSSEIEARYLTIDWQSEGVARAIEVAPVPLEIESCTKGGFAVESTIFNDFHPWLGIRLGAGLEEMVPVFVTASGQETPLLQVADPRGGGFWWLRNDGWDHAGKRHLSELQRSPGIYNIRIGDVMLRVENRLSAFGRADIQAYVDDFRGDLLWMIMNDVAGATATGKGAGSGTELAEALAELHAASQRVLASPAVTIREVQAPQPIAKLHPNTSSFREYARNPAARQLTGRVFEESAETAENRYLRHMLRVSLKVADAYVSAASLQLGFLDRLASQERERARRNREMEMRAVDPEVFDQQTEDIKWKLDALADFKDLQGSARGRFGQISIRIGSRYYQDFSFYYSREGGNGSIADNDIDYRVVVLPKELFELILGCLHFCRNFTIKGNIDSRVEETARGK…	Stutzerimonas stutzeri	Gammaproteobacteria
Gammaproteobacteria	Pseudomonas sp. Choline-02u-1	PJBC01000004.1	CXF97_05800	gi|1305124165|gb|PKH84161.1|	MSVFVPPSELRTYLKTGQVDGFAVAELDLSPLIERTSRADPLACMVRPNTLEPLSHIPESWWHIQDIQSAPLPFIVTKVRDAVEDLVRRETAQAGEKLQAMREEVEATVDRKAVLDDEYRRIEVEIGQRTDRIAALEAEFAQRTSTLQNKFGELESFFRERGERMVALNLVDRADIEKVLPSQTTFDARNGYHFGKELEGSLERLASYIQAFLWRKGVLFTRAQLLDFITLLRTNDLIVLAGDSGSGKTSLVKSFAQAVGGRCTVVPVKPNWTGSDDLLGYYNPIERRYHPSQFLLALLEAAREPQIPHFICLDEMNLARVEYYFADFLSLLETRSQAPWIHLYSSTEERQAIVDNKIFLTLEEEARKRAGLGDDASFCEILMNDQANLELRRLAGFQE…	CXF97_05795	gi|1305124164|gb|PKH84160.1|	MSLQIEVRYLVINWQSEGVARDIKAAPHALEIERDASGELSVESTVFNDFHPWLGIRLESALDNTIPVFVSASGEETPMLRIADQQGCGQWWLQHDGWDPLNKRHFSELHRSAGAYFIRLGNLRLRIENRLSSFGRADIQAYINDFRGDLLWMIMNDAAAATASGQGPGSGAELAVALKALNAASNRVLASPAVDIREGQAPQSIAKLRPNAATFHEYLRNPAARYFTGRVFNESADIPENRYVRHMLAVALKVAAAYMSAATLQTDFLRRLTSQEAERASRDSAIKSRAVDPEVFDHQTQDIARRLEALTCFTGPSTEYPDQIARFPIRLGKRYGDKCAFFYERQDGQQASGDAEIDYRVVVLPEDVFELILAAHHFCKDLTLAGCAQTSVKITSSGK…	Pseudomonas sp. Choline-02u-1	Gammaproteobacteria
Gammaproteobacteria	Pseudomonas sp. MYb60	PCOZ01000008.1	CQ041_15420	gi|1355277545|gb|PRB25446.1|	MQQDGVSAASGEGYAEELPSLGWSEEDLRYYLAQVWGQRDPLHLRVIGRLQLAEGKTFGFLVDLHHAETGIRLPPPLKNASVRQSVFVPPSELSRIQKLGRIESFASAELDLSPLDERKKRGDPFGCMVHPETLEPLSHIPESWWSIKNIQSEAMPLVVTKVREAIEDRLQRETSEAGDKLLAAQLALEVAAQNKKLLDDEYGRIGLEVDQRMDRIAALDTEFVQRKNTLETRFRELEAFLQDRSERMVALNLIDRADLEKVFPLIGAPDTREGHRLREALAGNLQRLASYIQAFLWRKGILYTRAQLLDFITLLRTNDLIVLAGDSGSGKTNLVKSVASAVGGRCTIVPVKPNWTGSDDLLGYYNPIERRYHPTQFLLALLDAAREPEIPHFICLDEM…	CQ041_15415	gi|1355277544|gb|PRB25445.1|	MPPEIEARYLTIDWQSEGVARAIEVAPVSLEIEPRTDGEFVVESVIFNDFQPWLGIRVGPGFEDVMPVFVTALGQETPMLQVADPRGGGFWWLRNDGWDHAGKRHLSELQRSAGVYNIRIDDLTLRVENRLSTFGRADIQAYIDDFRGDLLWMIMNDSAGATATGKGAGAGTEFADALKELHTASHRVLASPAVNIREGQAQQPLAKLRPNTVTFREYARNPTARQLTGRVFNESADTAENRYLRHVLAVSLKVADAYVSAASLQSSFLDRLASQESERARRDREMEMRPVEPEVFDQQTEEIKRKLDALADFKSRSGHEADLVGRFPIRLGKRYFDHFAFYYTPQDAMASNVASPVDYRVVVLPKDLFELILGAHHFCKNFTLTGSVDSRVRDTSKGQ…	Pseudomonas sp. MYb60	Gammaproteobacteria
Gammaproteobacteria	Pseudomonas sp. WS 5086	JAAQWT010000010.1	HBO03_13550	gb|NMX92159.1|	MVHEIVSETVKYAPDELIGKSDAELLSLLKKSWGYAADQPLTVIGKFTAGEGGQRPYFLTLLRSTNDSSRLEYPVDVYPISHRVYISPRDGSFLLERNEGAVYYTARVQLSPEIERERQRNRLTLQTVSGSLEALEELPFELGSKVMEEGKVFLEKSIVDFYRHKHRTQLEADFTLLKSELEQEQAHLDESVAQLKSDEKQISEQLDKKTRSLQQTQEQVQVQHQRLSVLTENYQTRKAVMDSQLARLNDFVRDKADTLLRLGFLDERDMQALLGEAQQHDATECHDFELVFGLDADAAIAHIQAFLHARGIYYRQALLKDFLALLRTQDLIVLAGDSGSGKTYLVKSFAQAIGGKAIVIPVKPNWTSTEDLLGYYNPLEKRYITTQFLDALIEAANNP…	HBO03_13545	gb|NMX92158.1|	MGRQLLGPVMQPNLEFRNLDISWADAETLLKLESSSDALDAVESCGVYRVETTTFRRYQPWLGLRINEPLVHPPYCMLGSGGQIPLLPVKDPATRQIWWIHSTGWDEKNTRHLSEMYRTAGTVELVVQNRRYDLVVHTANFNVDELEYYLRDFKNELWMLILNEQSAIKGRTEQEVPNLYSDELVDRLKDFVEALEHIAKTPGVELKEIQALMPARSVRPINRTFMELATKGQSRFLTGRTFQESLNTPDNQHLHYCLSRVNYLVSRFREIGSARIRAFELAMASDLSRLQELAQTEFRVVDQTVFDNEIREIERELRRNENVFQDALSGQKECSVAGLRKGGCNIVLGKLFRNAETEFFCNQVNGRDYKKEISDGKYLTVKLPGSFASFAQKFQQSKF…	Pseudomonas sp. WS 5086	Gammaproteobacteria
Gammaproteobacteria	Aliivibrio fischeri	WOBK01000002.1	GNP76_02390	gb|MUK71978.1|	MSEEKSNQEGLLTPKQGVKYSAEVLKNLSDIELHQKLCDEWGFSNKKITVWARLRRVSGVVEYTVDNIHHALTNERLEYPYDAKYPLRNGVFISKSAGRFFFKDEEDTYIKAELELSPKRERDKHNNPFELNVVSSSVELLVELPIDITEHKNILENTSGMFFSNDVEVFISQAVYDRQLSKMTTDFEVIKQRHEDELTSSVDKIKRTIEENEKENTNLVETISENHEKNKLLRLENKQTEKIILEQKETTERYRSEIQELKVQLSKLENDMSQKIERLKNYVVEKAGFLKDFEFIDEDVYFQLTEQKTDQDIDRSNFLSFINDFEADYGKVAAYLQAYLKDQGQYYSRHIVENYLTLLRTNDLIILAGDSGSGKTSLVQSFAKAVGGVAKIIPVKPNW…	GNP76_02395	gb|MUK71979.1|	MSNVPIVLKYIETRWHDKDTLVRLTESQYPLKIELNEDGLYEANTTIYPKVSDLNYSQLAINLGKDIENVTPYIIGPNNQKLPMKKIVDPVLEKIWWVETGEWNDEFKAWVTNTRRTAGNIEFQVGTQRLSLHIGFSEASKEDLEKYLTDFKSDMWELILDDNSYIQAEAKEGQVGGVDESTLRFINNILKCGKKLLQQPKSELREVQTLKPRKAVKPVPRTFMEISTRGNCKTLTSRDSEPNYNVAENRYALYVLLATSRIVSQLVQVSKSKSERFSNSLLKLEERLASLKDYKEINRDLVVKDYNRAKKSVDVNVINEKTLVELNIINGSNILTGNVGYISIQGKNRYNGFFCKIKNQEHEEWGNIRGYSSTAINIPERYKDLLIPYTDYYMQAEID…	Aliivibrio fischeri	Gammaproteobacteria
Gammaproteobacteria	Aliivibrio fischeri	WOBD01000008.1	GNP68_06970	gb|MUJ23895.1|	MSEEKSNQEGLLAPKQGVKYSDEVLKNLSDIELHQKLYETWDFHNKKIIVWGRLRRINGVVEYYKVDYIHHALTNEKLEYPYDAKYPMRNGVFISSSAGRSFFKDEEDTYIKAELELSPKRERDKHNNPFELNVVSSSVELLVELPIDITEHKNVLENTSGMVFSNDVEVFISQAVYDRQLSKMTTDFEVIKQRHEDELTSSVDKIKRTIEENEKENTNLVETISENYEKNKLLRLENKQTEKIILEQKETTERYRSEIQELKVQLSKLENDMSQKIERLKHYVVEKAGFLKDFEFIDEDVYFQLTEQKTDQDIDRSNFLSFINDFEADYGKVAAYLQAYLKDQGQYYSRHIVENYLTLLRTNDLIILAGDSGSGKTSLVQSFAKAVGGVAKIIPVKPN…	GNP68_06965	gb|MUJ23894.1|	MSNVPIVLKYIETRWHDKDTLVRLTESQYPLKIELNENGIYEANTTIYPKVSDLNYSQLAINLGKDIENVTPYIIGPNNQKLPMKKIVDPVLEKIWWVETGEWNDEFKAWVTNTRRTAGNIEFQVGTQRLSLHIGFSEASKEDLEKYLTDFKSDMWELILDDNSYIQAEAKEGQVGSVDESTLRFINNILKCGKKLLQQPKSELREVQTLKPRKAVKPVPRTFMEISTRGNCKTLTSRDSEPNYNVAENRYALYVLMATYRIVSQLVQVSKSKSERFSNSLLKLEERLASLKDYKEINRDLVVKDYNRAKKSVDVNVINDKTLVDLNIINGSNILTGNVGYISIQGKNRYNGFFCKIKNQEHEEWGNIRGYSSTAINIPERYKDLLIPYTDYYMQAEID…	Aliivibrio fischeri	Gammaproteobacteria
Gammaproteobacteria	Photobacterium angustum	JZSM01000002.1	UB39_02875	gi|767074773|gb|KJF96279.1|	MDLEHVTYKLDEVKGLSDEELYQRLCESWGITNGKLAVWGKIKNGPDSDSRNLPTRLLDIKSLQTGLDTEYPINVRFTMDKGVFVSLKSVEELFGIEDGSFVSCELALAPQSEREKHENPFECNVLVSSVRRLVKLPEYTAEDIIKGDENIFLDNAVYKLHLQNVQARIDNEVSVLNAEFDREESSLKAQISSYKNQLQQTQDDLNQKNNVLSKAIEKAQKLEDEHSELQQKIALQKKAEETMSRKIEHLKAYVESKAGFLKSFEFLDDDDFDLFVGSTLSNKHSDEHISFSQAFDSNYSDAVSYIQAYLKERDILYPRHIIENFLTLIRTNDLIILAGDSGSGKTNLVQSFAKAIGGVSKIIPVKPNWTSSEDLLGYYNPLEKKYLATPFLEALIEAK…	UB39_02870	gi|767074772|gb|KJF96278.1|	MEAPFIIKFIETKWHDKQTLVSVSESEYSLKLESTGNNAFSAHTTIYPKVDELRFAQLAIKTRHGQQSPPYIAMPNGESRQLESIIDPASKAVWWVEPANWDAKQRVWRSEARRTAGQIAFVIGNSTLKLDIDISEQTKSDLSRYLSDFKSDLWELILDENSHITGDAKNSQVVAIDQEALSLVASILSNVQTILKKPKVELKEVQALKSAKEVRPVPRTFMEICTKGSRKHLTSRASEPSYNVPENQYVLYVVSITLSIVKQLVRVAESKKSRFSGAIEKLNERLDSLKDYRIINRDLVVKDLERLKKRFDTEVINAELARQLGEINANKYFLPNHAAKGYLRLEKTTGSENEWWAKIKPSQHVDWQQFELNGYTIFSSGEHYASLFKPYSDYDMVAI…	Photobacterium angustum	Gammaproteobacteria
Gammaproteobacteria	Photobacterium angustum	PYOK01000002.1	CTN03_03610	gi|1372623375|gb|PSW82267.1|	MDLEHVTYKLDEVKGLSDEELYQRLCESWGITNGKLAVWGKIKNGPDSDSRNLPTRLLDIKSLQTGLDTEYPINVRFTMDKGVFVSLKSVEELFGIEDGSFVSCELALAPQSEREKHENPFECNVLVSSVRRLVKLPEYTAEDIIKGDENIFLDNAVYKLHLQNVQARIDNEVSVLNAEFDREESSLKAQISSYKNQLQQTQDDLNQKNNVLSKAIEKAQKLEDEHSELQQKIALQKKAEETMSRKIEHLKAYVESKAGFLKSFEFLDDDDFDLFVGSTLSNKHSDEHISFSQAFDSNYSDAVSYIQAYLKERDILYPRHIIENFLTLIRTNDLIILAGDSGSGKTNLVQSFAKAIGGVSKIIPVKPNWTSSEDLLGYYNPLEKKYLATPFLEALIEAK…	CTN03_03615	gi|1372623376|gb|PSW82268.1|	MEAPFIIKFIETKWHDKQTLVSVSESEYSLKLESTGNNAFSAHTTIYPKVDELRFAQLAIKTRHGQQSPPYIAMPNGESRQLESIIDPASKAVWWVEPANWDAKQRVWRSEARRTAGQIAFVIGNSTLKLDIDISEQTKSDLSRYLSDFKSDLWELILDENSHITGDAKNSQVVAIDQEALSLVASILSNVQTILKKPKVELKEVQALKSAKEVRPVPRTFMEICTKGSRKHLTSRASEPSYNVPENQYVLYVVSITLSIVKQLVRVAESKKSRFSGAIEKLNERLDSLKDYRIINRDLVVKDLERLKKRFDTEVINAELARQLGEINANKYFLPNHAAKGYLRLEKTTGSENEWWAKIKPSQHVDWQQFELNGYTIFSSGEHYASLFKPYSDYDMVAI…	Photobacterium angustum	Gammaproteobacteria
Gammaproteobacteria	Photobacterium leiognathi subsp. mandapamensis	PYNS01000033.1	C0W93_19625	gi|1372444363|gb|PSV07539.1|	MDLEHVTYNLDEVKGLSDEELYQRLCESWGITNGKLAVWGKIKNGPDSDSRNLPTRLLEIKSLQTGLDTEYPINVRLTMDKGVFVSFKSVEELFGIEDGSFVSCELALAPQSEREKHENPFECNVLVSSVRRLVKLPEYTAEDIIKGDENIFLDDAVYKLHLQNVQARIDNEVSVLNAEFDREESSLKAQISSYKDQLQQTQDDLNQKNNVLSKAIEKAQKLEDEHSELQQKIALQKKAEETMSRKIERLKAYVESKAGFLKSLEFLDDDDFDLFVGSPLSNKERGEHISFSQAFDSNYSDAVSYIQAHLKERDILYPRHIIENFLTLIRTNDLIILAGDSGSGKTNLVQSFAKAIGGVSKIIPVKPNWTSSEDLLGYYNPLEKKYLATPFLEALIEAK…	C0W93_19620	gi|1372444362|gb|PSV07538.1|	MESPFIIKFIETKWHDKQTLVSVSESEYSLKLEHTGNNAFSAHTTIYPKVDELRFAQLAIKTRHAQQSPPYIAMPNGERRQLESIIDPASNAVWWVEPAHWDAKQRVWRSEARRTAGQITFVIGSSTLKLDIDISEQTKSDLSRYLSDFKADLWELILDENSHITGDAKNSQVAAIDQEALSLVASILSNAQTILKKPKVELKEVQALKPAKEVRPVPRTFMEICTKGSRKHLTSRASEPSYNVPENQYVLYVVSSTLSIVKQLVKVAESKKSRFSGAIEKLNERLDSLKDYRIINRDLVVKDLERLKKRFDTEVINAELASQLGEINANKYFSPNHAAKGYLRLEKTTDSENEWWAKIKPSQHVDWQQFELNGYTIFSSGEHYASLFKSYSDYEIEAK…	Photobacterium leiognathi subsp. mandapamensis	Gammaproteobacteria
Gammaproteobacteria	Photobacterium phosphoreum	LZFG01000078.1	AYY26_07100	gi|1040606636|gb|OBU40088.1|	MALEQVIYDLEQVKGLSDEELYQRLYDSWGLENHKIDVWGELSINEAGNWAGIRNAKTLSGNQSIEYPLADSHELQSGVFLNPSVAKIVLGNDTKGMVACELMLASIQQRAKKNNPFLLAVNDKTVECLTYLPDALPNLDRQALIQNEDETLLRKVIYDAEVKRVKHKIASETEALEVALQEKQQDMTDKLAELSDAFKSTQDKITASTTELESSIKRNEELNNDNHRLNLKIQESKAELDVIIEKSRRVEESMARKVEKLIDFIKEKAIFLKNFEFLDEEDFDFFVGSSLSNKERGEHISFSQAFDSNYSDAVSYIQAHLKERDILYPRHIIENFLTLIRTNDLIILAGDSGSGKTNLVQSFAKAIGGVSKIIPVKPNWTSSEDLLGYYNPLEKKYLA…	AYY26_07095	gi|1040606635|gb|OBU40087.1|	MEAPFIIKFIETKWHDKQTLVNVSESEYSLKLEHTGNNAFSAHTTIYPKVDELRFAQLAIKIKHGDQSPPYIAMPNGDRKPLESITDPASNVVWWVEPAHWDAKQRVWRSEARRTAGQITFVIGNSTLKLDIYISEQTKSDLSRYLSDFKADLWELILNENSHITGDAKNSQVAAIDQEALSLVASILSNAQTILKKPKVELKEVQALRPTKEVRPVPRTFMEICTKGSRKHLTSRASEPNYNVPENQYVLYVVSSTLSIVKQLVRVAESKTSRFSSAIEKLNERLESLKDYRMINRDLIVKDLERLKKRFDTEVINAELSEQLAKINAKLSRSYSEKGYLRLEKATGSENEWWAKIKPSQNDDWQQFEPDGYTIFSSRKHYASLFKSYSDYEIEAKIT…	Photobacterium phosphoreum	Gammaproteobacteria
Gammaproteobacteria	Photobacterium sp. GB-50	PYNX01000006.1	C9J41_10900	gi|1372614289|gb|PSW73708.1|	MDLEHVTYNLDEVKGLSDEELYQRLYDSWGLENHKIDVWGELSINEAGNWAGIRNAKTLSGNQSIEYPLTDSHELQSGVFLNPSVAKIVLGNDTKGMVACELMLASIPQRAKKNNPFLLAVNDKTVERLTYLPDALPNVDRQALIQNEDETLLRKVIYDAEVKRVKHKIASETEALEVALQEKQQDMTDKLAELSDAFKSTQDKITASTTELESSIKRNEELNNDNHRLNLKIEESKAELDVIIEKSRRVEESMARKVEKLIDFIKEKAIFLKNFEFLDEEDFNFFVGSSLSNKERGEHISFSQAFNSNYSDAVSYIQAHLKERDILYPRHIIENFMTLIRANDLIILAGDSGSGKTNLVQSFAKAIGGVSKIIPVKPNWTSSEDLLGYYNPLEKKYLA…	C9J41_10895	gi|1372614288|gb|PSW73707.1|	MEAAFIIKFIETKWHDKQTLVSVSESEYSLKLESTGNNAFSAHTTIYPKVDELRFAQLAIKTRHCQQSPPYIAMPNGESRQLESIIDPASKTVWWVEPANWDAKQRVWRSEARRTAGQIAFVIGNSTLKLDIDISEQTKSDLSHYLSDFKSDLWELILDDNSHITGDAKNSQVAAIDQEALSLVASILSNAQTILKKPKVELKEVQALKPAKVVRPVPRTFMEICTKGSRKHLTSRASEPIYNVPENQYVLYVVSSTLSIVKQLVRVAENKKSRFSGAIEKLNERLDSLKDYRIINRDLVVKDLERLKKRFDTEVINAELASQLGEINANKYFSLNHAAKGYLRLEKTTGSENEWWAKIKPSLHDDWQQFELNGHTIFRSGEHYASLFKPYSDYDMVAI…	Photobacterium sp. GB-50	Gammaproteobacteria
Gammaproteobacteria	Vibrio crassostreae	RKHM01000009.1	EDB55_1652	gi|1515916072|gb|ROR86958.1|	MTDVNTVYSIGVVKDLTDDELYQKLYESWGITDRKIDVWGELNINETGSWAGLRNAKTLQGNQKIEYPLSGSNELQSGVFLSPVMAKAFLGGEKKVMVACQLVLASPRQRVIKNNPFLLAVDENTVERLTDLTSVLSESERKNIVADSESTFIRTAVYDLEVKSVKDQIESETGALKQLFQSTKTKTRQEIQKLEEEKELSQKKVTDLVGDLKQLTVENEQLSQDKEKVSQSIAASKAKLEMMVEQNRKVEENMAKKIEKLTNFIEEKAVFLKTFEFIDEEDFDSFIFNAVKERDTESMVSFSDVLEGDYEKAVSYIQSYLKEQDILYPRHIIENYLTLIRSNDLIVLAGDSGSGKTNLVQSFAKAVGGVSKIIPVKPNWTSSEDLLGYYNPLEKKYLA…	EDB55_1651	gi|1515916071|gb|ROR86957.1|	MLPKFEIKYIDVQWHDKNTVLKVVESYLPLPVSYDDTQKNFNCTTTIYPKAEGIRLGQLAFRYLEGGTKAPYFEKADGARVPLKKIKDKDTGKSWWIEAVSWKSDTKQWTRTLHRTAGAVKAGLGSQSCTIHIGSSEFTAEQLNRYLSDFKSDLWELILDEQSYVTAKAKKVEEGGVDEETLKLVSNLMSHAQNIIKKPKSELREVQALKPRKLVKPVNRTFMELATKGYSKELTSRATTPSFNVPENRYVLFVLQRLHSILKQLVTISQSKVNRFEGMTMKLTERLNDFSGEKSINKDLVRKHLEQIKKTYDLEYLNSQLQDKLASSIQLNTSSLERSNRWLIKVGEASKYYANTYFLSIRINCSLPWYSSDGSAQQVFLKFADSSHAALFEKGLEYE…	Vibrio crassostreae	Gammaproteobacteria
Gammaproteobacteria	Vibrio cyclitrophicus	MCTQ01000065.1	BCU99_06495	gi|1326407340|gb|PMG07402.1|	MDDNKLTYDKGYAKQLNDNDLYKCLFDAWGVRNENLQVWGLLTINAQGNWAGIKQAKLVENNIPIEYPLPNSRELQSGVFLSPNDATNFLNGKSSAYIRCELKLAAPQQRKVKNNPFLLSVIPASVDVLTELPKFVSDDLLQSDFSTLLSEHIYEHYVNTLEKRTRIAEKDMQFKLEELDREHTKVKEKLAEELVVLKEETRSKIDQVEIEYTDRKQVLSAQTNEAEKQLTGLQNKQENIKNKLSDLELQTENVQSNLIKEQSLLSSIIEQQKQVEGEMSKKIERLKQYVEEKAGFLKDFEFIDDDIYAELTGNKPEFSELISTLNFADDFGSDYSKLTSYLQAYLKEQGQYYSRHIVENYLTLIRTNDLVILAGDSGSGKTSLVQSFAQAVGGVAKII…	BCU99_06490	gi|1326407339|gb|PMG07401.1|	MSNANFVIKHIETFWHDKFTLLEVVESQYHLSLNEVSKDQFETFTTIYPHVEGLNRSQIAISYTDRNSHLSPVIVLPGGTTVPLKKIEDPSTGKIWWVEPGEWNSYNKEWRNNTHRTAGAISFRIGKQNLKLHVTLSDASKDDLDKYLIDFKSGMWELILDESSYIHAEAKKGIAGSVDETTLKLVDSILSAGRHVLKKPKSELREIQTLKPRKAVKPVPRTFMEIATKGESRQLTSRGSKANFNVAENCYVLYVLMATQRIVSQLCRVSRSKTERLSNNLEKLQQRADSLRDYKEVNRDLVVKDYKVALESLNVEKINLDKANYLSKLEQYSSSGGCSTGFLKVQKATNKNDGYFCKIKHDENGEWQNLGNSRTMILNIDDKYSPLFESNSEYLLSAE…	Vibrio cyclitrophicus	Gammaproteobacteria
Gammaproteobacteria	Vibrio cyclitrophicus	MCRX01000001.1	BCV43_00240	gi|1326215910|gb|PME23806.1|	MDDNKLLYDKNYAKQLDDNDLYKCLYDAWKVQNEIIQVWGSLEGNAARTWFSLKQVKLIDTGEPIEYPLPNNNDLQAGVFLHPATAQALLNGKESALVKGELKLASVNNRKNKDNPFLVSLVPSSVEVVTELPKFSTDDIMQSDLTTLVSENVYRHFLSNLESKTAVDEEKAQAKLTRLDVTYSERQKILDTQFDEINSKVEGLNVKRDSLLDKLKDLEKLQYTVKANIEQEKSTLNLIIEKQQQIEDEMSKKIELLKQYVEEKASFLRDFEFIDEDVYAELSGIKPDSSEHSSGLNFVDDFGSDYSKLTSYLQAYLKEQGQYYSRHIVENYLTLIRTNDLVILAGDSGSGKTSLVQSFAQAVGGVAKIIPVKPNWTSSEDLLGYYNPLEKKYLATPFL…	BCV43_00235	gi|1326215909|gb|PME23805.1|	MSNANFVIKYIETSWHDKFTLLELVESQYHLLLDEVSKEKFEAFTTIYPNVEGLKRSQIAISYTDRKTNRSPVIVLSGGTTVPLKKIEDPNTGKIWWVEPGEWNSHNKEWRNNTHRTAGAISFHIGKQNLKLHVTLSDASKDDLDKYLIDFKSGMWELILDESSYIHAEAKKGIAGSVDETTLKLVDSILRAGRHVLKKPKSELREIQTLKPRKAVKPVPRTFMEIATKGESRQLTSRGVKANFNVAENCYVLYVLMATQRIVSQLCRVSRSKTERLSNNLEKLQQRADSLKDYKEVKRDLVVKDYKVALESVNVEKINLDKAKYLEKLEQYSSSGAGSTGFLKVQKATNNNDGYFCKIKYDENGEWQNLGNSSSMILNLNDKYFPLFEPNSEYLLSAE…	Vibrio cyclitrophicus	Gammaproteobacteria
Gammaproteobacteria	Vibrio cyclitrophicus	MCXA01000046.1	BCU11_04745	gi|1326817327|gb|PMJ94483.1|	MDDNKLLYDKNYAKQLDDNDLYKCLYDAWKVQNEIIQVWGSLEGNAARTWFSLKQVKLIDTGEPIEYPLPNNNDLQAGVFLHPATAQALLNGKESALVKGELKLASVNNRKNKDNPFLVSLVPSSVEVLTELPKFSTDDIMQSDLTTLVSENVYRHFLSNLESKTAADEEKAQAKLTRLDVTYSKRQKILDTQFDEINSKVEGLNVKRDSLLDKLKDLEKLQYTVKANIEQEKSTLNLIIEKQQQIEDEMSKKIELLKQYVEEKASFLRDFEFIDEDVYAELSGIKPDSSEHSSGLNFVDDFGSDYSKLTSYLQAYLKEQGQYYSRHIVENYLTLIRTNDLVILAGDSGSGKTSLVQSFAQAVGGVAKIIPVKPNWTSSEDLLGYYNPLEKKYLATPFL…	BCU11_04750	gi|1326817328|gb|PMJ94484.1|	MSNANFVIKYIETSWHDKFTLLELVESQYHLLLDEVSKEKFEAFTTIYPNVEGLKRSQIAISYTDRKTNRSPVIVLSGGTTVPLKKIEDPNTGKIWWVEPGEWNSHNKEWRNNTHRTAGAISFHIGKQNLKLHVTLSDASKDDLDKYLIDFKSGMWELILDESSYIHAEAKKGIAGSVDETTLKLVDSILRAGRHVLKKPKSELREIQTLKPRKAVKPVPRTFMEIATKGESRQLTSRGVKANFNVAENCYVLYVLMATQRIVSQLCRVSRSKTERLSNNLEKLQQRADSLKDYKEVKRDLVVKDYKVALESVNVEKINLDKAKYLEKLEQYSSSGAGSTGFLKVQKATNNNDGYFCKIKYDENGEWQNLGNSSSMILNLNDKYFPLFEPNSEYLLSAE…	Vibrio cyclitrophicus	Gammaproteobacteria
Gammaproteobacteria	Vibrio genomosp. F6	SYUT01000028.1	FCV43_11740	gi|1633044874|gb|TKF21075.1|	MDDNKFLYDKNYAKQLDDNELYKCLYDAWKVQNDTIQVWGSLEGNAARTWFSLKQAKLIDTGEPIEYPLPNNNDLQAGVFLHPATAQALLNGKESALVKGELKLASVNNRKSKDNPFLVSLVPSSVEVLTELPKFSTDDIMQSDLNTLVSENVYRHFLSNLESKTAVDEEKAEAKLKRLDVTYSERQKILDTQFDEINSKVEGLNVKRDSLLDKLKDLEKLQYTVKANIEQEKSTLNLIIEKQQQIEDEMSKKIELLKQYVEEKASFLRDFEFIDEDVHAELSGSKPDSGEHSSGLSFVDDFGSDYSKLTSYLQAYLKEQGQYYSRHIVENYLTLIRTNDLVILAGDSGSGKTSLVQSFAQAVGGVAKIIPVKPNWTSSEDLLGYYNPLEKKYLATPFL…	FCV43_11745	gi|1633044875|gb|TKF21076.1|	MSNANFVIKYIETSWHDKFTLLELVESQYHLLLDEVSKEKFEAFTTIYPNVEGLKRSQIAISYTDRKTHRSPVIVLPGGTTVPLTKIEDPNTGKIWWVEPGEWNSHNKEWRNNTHRTAGAISFRIGKQNLKLHVTLSDASKDDLDKYLIDFKSGMWELILDESSYIHAEAKKGIAGSVDETTLKLVDSILSAGRHVLKKPKSELREIQTLKPRKAVKPVPRTFMEIATKGESRQLTSRGSKANFNVAENCYVLYVLMATQRIVSQLCRVSRSKTERLSNNLEKLQQRADSFKDYKEVKRDLVVKDYKVALESVNVEKINLDKAKYLEKLDQYSSSGGGTTGFVKVQKATNNNDGYFCKIKYDDNGEWQNLGNSSSMILNLNEKYFPLFEPNSEYLLSAE…	Vibrio genomosp. F6	Gammaproteobacteria
Gammaproteobacteria	Vibrio lentus	MCWE01000003.1	BCU33_15145	gi|1326714624|gb|PMI96071.1|	MNTVYSIGVVKDLTDDELYQKLYESWGITNSKIEVWGELTINAGGNWAGIKKARRVNDNQYIEYPLEGSRDLQSGVFLPPKVARDILGQDKTAMVSCELSLASKQQRIHKNNPLLLAVKVDSVEQLTSLPAIETEALFEADGESYLLKHIYDFHLKQVRDDIAKETEQIAQTYEAKKAEYETNATQLKSSLKSSAAQLDQAQSTAENLRVKNSELSEANNLINQSIVDKQDELTSLVDQYKQVEVKMGKKIEKLTSFIEEKAVFLKTFEFIDEEDFDSFVFKAVKERDPAEMVSFSEFLDGDYERAVSYIQSYLKEQDILYPRHIIENYLTLIRSNDLIVLAGDSGSGKTNLVQSFAKAVGGVSKIIPVKPNWTSSEDLLGYYNPLEKKYLATPFLEAL…	BCU33_15140	gi|1326714623|gb|PMI96070.1|	MLPKFEIKYIDVQWHDKNTVLKVVESYLPLPVSYDDTQKNFNCTTTIYPKAEGIRLGQLAFRYLEGGTTAPYFEKADGARVQLKKIKDKDSGKSWWIEAVSWKSDTKQWTRTLHRTAGAVKAGLGSQSCTIHIGSSEFTAEQLNRYLSDFKSDLWELILDEQSYVTAKAKKVEEGGVDEETLKLVSNLMSHAQNIIKKPKSELREVQALKPRKLVKPVNRTFMELATKGYSKELTSRATTPSFNVPENRYVLFVLQRLHSILKQLVTISQSKINRFEGMTMKLTERLNDFSGEKSINKDLVRKHLEQIKKTYDLEYLNSQLQDKLASSIQLNTSSLERSNRWLIKVGEVSKYYANTYFLSIRINCSLPWYSSDGSVQQVFLKFADSSHAALFEKGLEYE…	Vibrio lentus	Gammaproteobacteria
Gammaproteobacteria	Vibrio ouci	SATR01000001.1	ELS82_01180	gi|1605014476|gb|TFH93603.1|	MALEQVIYDLKEVKGLSDEELYQRLYDSWGLENHKIDVWGELSINEAGNWAGIRNAKTLHDNQSIEYPLADSYELQSGVFLNPSVAKIVLGNDTKGMVACELMLASIPQRAKKNNPFLLAVNDKTVERLTYLPDALPNLDRQALIQNEDETLLRKVIYDAEVKRVKHKIASETEALEATLLEKQQDMTEKLAELSDAFKSTQDKITASTTELESSIKRNEELNNDNDRLNLKIQESKAELDVIIEKSRRAEECMARKVEKLTDFIKEKAIFLKSFEFLDDEDFDFFVGSPLSNKDRGEHISFSQSLNSNYSDAVSYIQAHLKERDILYPRHIIENFLTLIRTNDLIILAGDSGSGKTNLVQSFAKAIGGVSKIIPVKPNWTSSEDLLGYYNPLEKKYLA…	ELS82_01175	gi|1605014475|gb|TFH93602.1|	MEAPFVIKFIETKWHDKQTLVSVSESEYSLKLEQMGNNAFSAHTTIYPKVDELRFAQLAIKTKHGDQSPPYIAMPNGDRKQLESITDPASNAVWWVEPAHWDAKQRVWRSEARRTAGQIAFVIGNSTLKLDIDISEQTKSDLSRYLSDFKADLWELILDENSHITGDARNSQVAAIDQEALSLVASILSNAQTILKKPKVELKEVQALKLAKEVRPVPRTFMEICTKGSRKHLTSRASEPSYNVPENQYVLYVVSSTLSIVKQLVRVADSKKSRFSGAIEKLNERFESLKGYRTINRDLVVKDLERLKKRLDIEAINDELASQLSEINANKYFSPNHAAKGYLRLEKATGSENEWWAKIKPSLHDDWQQFELNGYTIFSSGEHYASLFKPYSDYDMVAI…	Vibrio ouci	Gammaproteobacteria
Gammaproteobacteria	Vibrio vulnificus	QCYD01000026.1	DC357_11455	gi|1382867360|gb|PUZ82354.1|	MALEQVIYDLKEVKGLSDEELYQRLYDSWGLENHKIDVWGELSINEAGNWAGIRNAKTLHDNQSIEYPLADSYELQSGVFLNPSVAKIVLGNDTKGMVACELMLASIPQRAKKNNPFLLAVNDKTVERLTYLPDALPNLDRQALIQNEDETLLRKVIYDAEVKRVKHKIASETEALETTLLEKQQEMTDKLAELSDAFKSTQDKITASTTELESSIKKNEELNNDNHRLNLKIQESKAELDVIFEKSRRAEEYMARKVEKLTDFIKEKAIFLKNFEFLDEEDFDFFVGSSLSNKDRGEHISFSQAFDSNYSDAVSYIQAHLKERDILYPRHIIENFLTLIRTNDLIILAGDSGSGKTNLVQSFAKAIGGVSKIIPVKPNWTSSEDLLGYYNPLEKKYLA…	DC357_11450	gi|1382867359|gb|PUZ82353.1|	MEAPFVIKFIETKWHDKQTLVSVSESEYSLKLEQMGNNAFSAHTTIYPKVDELRFAQLAIKTKYGNQSPPYIAMPNGDRKQLESITDPASNAVWWVDPAHWDAKQRVWRSEARRTAGQITFVIGNSTLKLDIDISEQTKSDLSRYLSDFKADLWELILDENSHIMGDAKNSQVAAIDQEALSLVASILSNAQTILKKPKVELKEIQALKPAKEVRPVPRTFMEICTKGSRKHLTSRASEPSYNVPENQYVLYVVSSTLSIVKQLVRVAESKTNRFSGAVEKLNERLSELKGYKKVNRDLLVKDLERLKRLYDVDYINEELSKSLALINTTNKIPSLQTNNGYIRLEGTTKERDGWFIQLKYSADGTWQALEDGKFTILKPSLPYFRLFQKESEYEIRAN…	Vibrio vulnificus	Gammaproteobacteria
Gammaproteobacteria	Vibrio vulnificus	RBZG01000025.1	D8T53_19455	gi|1576742291|gb|RZP65283.1|	MALEQVIYDLKEVKGLSDEELYQRLYDSWGLENHKIDVWGELSINEAGNWAGIRNAKTLHDNQSIEYPLADSYELQSGVFLNPSVAKIVLGNDTKGMVACELMLASIPQRAKKNNPFLLAVNDKTVERLTYLPDALPNLDRQALIQNEDETLLRKVIYDAEVKRVKHKIASETEALETTLLEKQQEMTDKLAELSDAFKSTQDKITASTTELESSIKKNEELNNDNHRLNLKIQESKAELDVIFEKSRRAEEYMARKVEKLTDFIKEKAIFLKNFEFLDEEDFDFFVGSSLSNKDRGEHISFSQAFDSNYSDAVSYIQAHLKERDILYPRHIIENFLTLIRTNDLIILAGDSGSGKTNLVQSFAKAIGGVSKIIPVKPNWTSSEDLLGYYNPLEKKYLA…	D8T53_19460	gi|1576742292|gb|RZP65284.1|	MEAPFVIKFIETKWHDKQTLVSVSESEYSLKLEQMGNNAFSAHTTIYPKVDELRFAQLAIKTKYGNQSPPYIAMPNGDRKQLESITDPASNAVWWVDPAHWDAKQRVWRSEARRTAGQITFVIGNSTLKLDIDISEQTKSDLSRYLSDFKADLWELILDENSHIMGDAKNSQVAAIDQEALSLVASILSNAQTILKKPKVELKEIQALKPAKEVRPVPRTFMEICTKGSRKHLTSRASEPSYNVPENQYVLYVVSSTLSIVKQLVRVAESKTNRFSGAVEKLNERLSELKGYKKVNRDLLVKDLERLKRLYDVDYINEELSKSLALINTTNKIPSLQTNNGYIRLEGTTKERDGWFIQLKYSADGTWQALEDGKFTILKPSLPYFRLFQKESEYEIRAN…	Vibrio vulnificus	Gammaproteobacteria
Gammaproteobacteria	Vibrio sp. F13	SYVM01000070.1	FCV73_16710	gi|1633115823|gb|TKF89089.1|	MDDNKLLYDKNYAKQLDDNELYKCLYDAWKVQNETIQVWGSLEGNAARTWFSLKQAKLIDTGERIEYPLPNNNDLQTGVFLHPATAQALLNGKESALVKGELKLASVNNRKSKDNPFLVSLLPSSVEVLIELPQFSTDDIMQSDLTSLVSENVYRHFLSNLESKTAADEEKAQTKLKRLDVTYSERQKILDTQFDEINSKVESLNVKRDSLLDKLKDLEKLQYTVKTNIEQEKSTLNLIIEKQQQIEDEMSKKIELLKQYVEEKASFLRDFEFIDEDVYAELSGSKSDSSEHSSGLNFVDDFGSDYSKLTSYLQAYLKEQGQYYSRHIVENYLTLIRTNDLVILAGDSGSGKTSLVQSFAQAVGGVAKIIPVKPNWTSSEDLLGYYNPLEKKYLATPFL…	FCV73_16705	gi|1633115822|gb|TKF89088.1|	MSNANFVIKYIETSWHDKFTLLELVESQYHLLLDEVSKEKFEAFTTIYPNVEGLKRSQIAISYTDRKTLRSPVIVLPGGTTVPLKKIEDPNTGKIWWVEPGEWNSHNKEWRNNTHRTAGAISFRIGKQNLKLHVTLSDASKDDLDKYLIDFKSGMWELILDERSYIHAEAKKGIAGSVDETALKLVDSILSAGRHVLKKPKSELREIQTLKPRKAVKPVPRTFMEIATKGESRQLTSRGVKANFNVAENCYVLYVLMATQRIVSQLCRVSRSKTERLSNNLEKLQQRADSLKNYKEVNRDLVVKDYKRARFEQNINSINIQYAQRLAEINSNTHSARSRLFIRLGKKNDYGAYFCLCKSDINEEWRSYRDFQFSPIELDGPYSELFREYTDYEITADFD…	Vibrio sp. F13	Gammaproteobacteria
unclassified Pseudomonadota	Proteobacteria bacterium ST_bin13	MSXQ01000024.1	BVN33_14865	gi|1175951998|gb|OQW71612.1|	MEEETHLMELRHRRLKELLSEKRDRLIALGLVDAGDIDAVMWENEAGEDGRSGIRFSEALDSDFSRLAPVLQIELQKKGLLYPQAVLRDFLALLRTRDLVVLAGDSGSGKTSLIRAASEAIGGVCTVVPVKPNWTGPEDLLGYYNPVERSYQATPFLVALQDAARQPDVPHFICLDEMNLARVEHYFADFLSLLEQRADLPTIQLYTADEERHVVVEQGLFLHVEAEARRRAGLGNTATLEDILGNDQANAEIHRLSGLTDKESVLIYHGRLRRSLAAQMRMPTSLTMPANVWIFGAVNMDDTTHQLSPKVLDRVHVLRFGNPMLADWDAIESEIDAAAGTLPADLSGLLIRSDEIGLRQDYPVFDRQDDNVRFLSDVSRRHLDPLGVEFGLRAIRQAQ…	BVN33_14860	gi|1175951996|gb|OQW71610.1|	MDVLAHYLEIEWETENTPRKLVVSTHPIEIEIARDGVLHAEVSIFRDFAPWMGLHLSGALAEATPETIAAGGQRAPWLKIADEQGRAWWIPATGWSKKTGRHLAEMHRSFGTFQVEIGPRSKLTIDAVALELDRAHAQDYLDDFRDDLVWLAVGQPTGAAARAGSDYSNELVEALADFAQAARRVVEHPSRDVRETTALTATAKLRPSADTFRAVMRRPGAKVYPSRVAVDSADVPENRYVRGLVEHCRRLAHSIARASNRHQGHLAVRAEREKARAAALLAMNVVEIDQEIYDNQLDEVSRVMEAIGAWGPDIAASGRPPREFHFEVGKEFREAGNGPKELFYRNPTRDRVADDQVRIDFSVARLPDALHDLVMAARRIDNGLALTVAGHASLTTFST…	Proteobacteria bacterium ST_bin13	unclassified Pseudomonadota
Gammaproteobacteria	Shewanella woodyi ATCC 51908	CP000961.1	Swoo_0500	gi|169810213|gb|ACA84797.1|	MSNTDIIYSFDVVKDLPDAELYQRLFDSWGITNGKIEVWGELRKNPFNDWVSLYDIKTVDGNRIISYPVSAHKGIDKGVFINQEVAKRLLGNDDTAWVRCELELSPPTERTKKSNPFDVSVKRGSAARLASLPLSNDDIIQGDVSNYIPELIYNFYIKNLTTEIAESKSAIESELKSLEFDKIAKESALEQLDQTYAKVSEESSQLSTLVTTKNEELKALKAQYEEMQLEMAMKIEKLKSYISEKAVFLKSFEFIDEDDFDSFIFEVTKSRGTEDMVSFSGILDGDYKQAVSYIQAYLKEQDILYPRHIIENYLTLIRSNDLIILAGDSGSGKTSLVQSFAKAVGGKSKIIPVKPNWTSSEDLLGYYNPLEKKYLATPFLEALIEAQQNPDIPYFICLD…	Swoo_0499	gi|169810212|gb|ACA84796.1|	MKAKFEVKYLDITWYDKNTVVSVTESFIPLKLEFEDTLKHFTCHTVIYPKTDGVKHGQLAFRALTKSSTAPYFERADGQRIPLKKVLDKDTGKTWWVEADVWLKDNKRWAGKSHRTAGNIKAYLSGQICQIVIGSSEFTAEQLNRYLSDFKSDLWELILDENSYVTGKAKKVQEGGISEESIQLVNNILSHAQNILKKPKSELREIQTLKPRKLVRPVNRTFMELATKGERKFLTSRATEPSYNVPENRYVLFALQRIHKILKQLVTISKSKVNRLENTVTKLNERLEAFSDVKQIDEELVLKDLKRMQSLSNAVDITNGLHKQLESINNNKPRQSTTYLWYLKLSKKTEDGSFFAGVKTNPNAPWFEYESVKETVILKFGNGSENYSPLFEPYFEYEV…	Shewanella woodyi ATCC 51908	Gammaproteobacteria
Gammaproteobacteria	Salmonella enterica subsp. enterica serovar Choleraesuis str. SC-B67	AY509004.1	SCH_170	gb|AAS76446.1|	MALEQVIYNLEEVKGLSDEELYQRLYDSWGLENHKIDVWGELSINVAGNWAGIRNAKTLSGNQSIEYPLADSHELQSGVFLTPSVAKIVLGNDTKGMVACELMLASIPQRAKKNNPFLLAVNDKTVERLTYLPDALPNLDRQALIQNEDETLLRKVIYDAEVKRVKHKIASETEALEAALQEKQQDMTDKLAELSDAFKSTQDKITASTTELESSIKRNEELNNDNHRLNLKIQESKAELDVIIEKSRKVEESMARKVEKLTDFIKEKAIFLKSFEFLDEEDFDFFVGSPLSNKERGEHISFSQALYSNYSDAVSYIQAYLKERDILYPRHIIENFLTLIRTNDLIILAGDSGSGKTNLVQSFAKAIGGVSKIIPVKPNWTSSEDLLGYYNPLEKKYLA…	SCH_171	gb|AAS76447.1|	METPFVIKFIETKWHDKQTLVSVSESEYSLKLEQTGNNAFSAHTTIYPKVDELRFAQLAIKTKQGDQSPPYIVMPNGDRKQLESITDPASNAVWWVEPAHWDAKQRVWRSEARRTAGQITFVIGNSTLKLDIDISEQTKSDLSRYLSDFKADLWELILDENSHITGDAKNSQVAAIDQEALSLVASILSNAQTILKKPKVELKEIQALKPAKEVRPVPRTFMEICTKGSRKHLTSRASEPSYNVPENQYVLYVVLSTLSIVKQLVKVAESKKSRFSGAIEKLNERLDSLKDYRIINRDLVVKDLERLKKRFDTEVINAELASQLGEINANKYFSQNHAAKGYLRLEKTTGSENEWWAKIKPSQHDDWQQFELDGYTIFSSGEYYASLFQPYSDYDMVAI…	Salmonella enterica subsp. enterica serovar Choleraesuis str. SC-B67	Gammaproteobacteria
Deinococcota	Deinococcus geothermalis DSM 11300	CP000359.1	Dgeo_1504	gb|ABF45799.1|	MPSLPRTTSRNTSKAWTSRAQICWTQPETSAQATAEVKAQRLSLDSYGLYFSRLCVFESCRSQPQRNSIVARDVLRTPLTTTRPARVEEKTQGKRTSSRGHSTLVVTRVPIGKTTWAVEANDHVVTNVQIGVFTPQPGEVYEAVPIGRGRVWRLSQRKAVQLLPDKLIHPKYPALFALARDLPAPEVLRIGESLAVVEETDPVSLVTLWHLVPEAEAAYVAGVLSGQDPYPDVNIRLSAVASQRLRPLSNRASEMLISAAQQYEAARQNWSEAVHEAQEQWRQLIDEATAELRLAEEHKEEVAAEVLRLQQAFEELTGEIREARQCKSELEDKLASLEEQLRSARERIQALEVTQQNPRAALRQRQRVLDEVEVLKYAWQQLASRLPDPIPLVQLHVAL…	Dgeo_1503	gb|ABF45798.1|	MTEARRVLSQHDINRMVAFLGDQAFRLSHREEGDPGRPLGWQDLRPDIERFARQWRELSSVWEALRLHPSEVLQSELREVPLGNRFRADAAALRRNVREGRLRRGPGGWGWHPSTESLWGRVEARTLDTPENAHVVSVLQAYRDTRAALHAALCREEESLGRELERQREYGGVSPRLRLLDRMMNRARREQAVLQGLPEFAPAAGWPALRSAPNRHNNRTRFDERYRAAADLEDDLASLFRAGRQIDRQQHLTELGERRPWELYEYWMVAKVCELLERLQFTPDCPSGFLSLEDARGGAYGLRNNACLTYTHGTGLSLQLTVQSDQTAGQRPDLQLDFVGGLDGQVRPLVLDAKCKDFRTAEHPDLLHDLEHSARRYVAANNGTAFLLHPSSLRAWPAQ…	Deinococcus geothermalis DSM 11300	Deinococcota
Gammaproteobacteria	Salmonella enterica subsp. enterica serovar Choleraesuis	EU219534.1	pOU7519_138	gb|ABX56848.1|	MALEQVIYNLEEVKGLSDEELYQRLYDSWGLENHKIDVWGELSINVAGNWAGIRNAKTLSGNQSIEYPLADSHELQSGVFLTPSVAKIVLGNDTKGMVACELMLASIPQRAKKNNPFLLAVNDKTVERLTYLPDALPNLDRQALIQNEDETLLRKVIYDAEVKRVKHKIASETEALEAALQEKQQDMTDKLAELSDAFKSTQDKITASTTELESSIKRNEELNNDNHRLNLKIQESKAELDVIIEKSRKVEESMARKVEKLTDFIKEKAIFLKSFEFLDEEDFDFFVGSPLSNKERGEHISFSQALYSNYSDAVSYIQAYLKERDILYPRHIIENFLTLIRTNDLIILAGDSGSGKTNLVQSFAKAIGGVSKIIPVKPNWTSSEDLLGYYNPLEKKYLA…	pOU7519_139	gb|ABX56849.1|	METPFVIKFIETKWHDKQTLVSVSESEYSLKLEQTGNNAFSAHTTIYPKVDELRFAQLAIKTKQGDQSPPYIVMPNGDRKQLESITDPASNAVWWVEPAHWDAKQRVWRSEARRTAGQITFVIGNSTLKLDIDISEQTKSDLSRYLSDFKADLWELILDENSHITGDAKNSQVAAIDQEALSLVASILSNAQTILKKPKVELKEIQALKPAKEVRPVPRTFMEICTKGSRKHLTSRASEPSYNVPENQYVLYVVLSTLSIVKQLVKVAESKKSRFSGAIEKLNERLDSLKDYRIINRDLVVKDLERLKKRFDTEVINAELASQLGEINANKYFSQNHAAKGYLRLEKTTGSENEWWAKIKPSQHDDWQQFELDGYTIFSSGEYYASLFQPYSDYDMVAI…	Salmonella enterica subsp. enterica serovar Choleraesuis	Gammaproteobacteria
Gammaproteobacteria	Salmonella enterica subsp. enterica serovar Schwarzengrund str. CVM19633	CP001125.1	SeSA_B0021	gb|ACF88559.1|	MALEQVIYNLEEVKGLSDEELYQRLYDSWGLENHKIDVWGELSINVAGNWAGIRNAKTLSGNQSIEYPLADSHELQSGVFLTPSVAKIVLGNDTKGMVACELMLASIPQRAKKNNPFLLAVNDKTVERLTYLPDALPNLDRQALIQNEDETLLRKVIYDAEVKRVKHKIASETEALEAALQEKQQDMTDKLAELSDAFKSTQDKITASTTELESSIKRNEELNNDNHRLNLKIQESKAELDVIIEKSRKVEESMARKVEKLTDFIKEKAIFLKSFEFLDEEDFDFFVGSPLSNKERGEHISFSQALYSNYSDAVSYIQAYLKERDILYPRHIIENFLTLIRTNDLIILAGDSGSGKTNLVQSFAKAIGGVSKIIPVKPNWTSSEDLLGYYNPLEKKYLA…	SeSA_B0022	gb|ACF88551.1|	METPFVIKFIETKWHDKQTLVSVSESEYSLKLEQTGNNAFSAHTTIYPKVDELRFAQLAIKTKQGDQSPPYIVMPNGDRKQLESITDPASNAVWWVEPAHWDAKQRVWRSEARRTAGQITFVIGNSTLKLDIDISEQTKSDLSRYLSDFKADLWELILDENSHITGDAKNSQVAAIDQEALSLVASILSNAQTILKKPKVELKEIQALKPAKEVRPVPRTFMEICTKGSRKHLTSRASEPSYNVPENQYVLYVVLSTLSIVKQLVKVAESKKSRFSGAIEKLNERLDSLKDYRIINRDLVVKDLERLKKRFDTEVINAELASQLGEINANKYFSQNHAAKGYLRLEKTTGSENEWWAKIKPSQHDDWQQFELDGYTIFSSGEYYASLFQPYSDYDMVAI…	Salmonella enterica subsp. enterica serovar Schwarzengrund str. CVM19633	Gammaproteobacteria
Gammaproteobacteria	Edwardsiella tarda	HQ332785.1	ETCK41_p72	gb|ADQ43897.1|	MTYLPDALPNLDRQALIQNEDETLLRKVIYDAEVKRVKHKIASETEALEAALQEKQQDMTDKLAELSDAFKSTQDKITASTTELESSIKRNEELNNDNHRLNLKIQESKAELDVIIEKSRKVEESMARKVEKLTDFIKEKAIFLKSFEFLDEEDFDFFVGSPLSNKERGEHISFSQALYSNYSDAVSYIQAYLKERDILYPRHIIENFLTLIRTNDLIILAGDSGSGKTNLVQSFAKAIGGVSKIIPVKPNWTSSEDLLGYYNPLEKKYLATPFLEALIEAKQNPDIPYFICLDEMNLARVEYYFADFLSKLEERNEQPTIQLYSDDEAAHVLAELKGVVSVISNAQEKFSKNGIVDFVALMQDEEINAEMKRAFGFSDKDSLIKYHGDIRRMLAGVLG…	ETCK41_p73	gb|ADQ43898.1|	METPFVIKFIETKWHDKQTLVSVSESEYSLKLEQTGNNAFSAHTTIYPKVDELRFAQLAIKTKQGDQSPPYIVMPNGDRKQLESITDPASNAVWWVEPAHWDAKQRVWRSEARRTAGQITFVIGNSTLKLDIDISEQTKSDLSRYLSDFKADLWELILDENSHITGDAKNSQVAAIDQEALSLVASILSNAQTILKKPKVELKEIQALKPAKEVRPVPRTFMEICTKGSRKHLTSRASEPSYNVPENQYVLYVVLSTLSIVKQLVKVAESKKSRFSGAIEKLNERLDSLKDYRIINRDLVVKDLERLKKRFDTEVINAELASQLGEINANKYFSQNHAAKGYLRLEKTTGSENEWWAKIKPSQHDDWQQFELDGYTIFSSGEYYASLFQPYSDYDMVAI…	Edwardsiella tarda	Gammaproteobacteria
Bacillota	Geobacillus genomosp. 3	CP006254.2	M493_17200	gb|AGT33648.1|	MTETQTKQLQQQLDAILDELGMPINWTQEEADQFYKRFCKSQKGLANRLILKITSIRNILGGKNLCFGEVLDPDTLSSFILPFEDKEWNVSFLLKNEKKRLNEGDVIVVVPEVLKVERIQQERNQARRMKEMVSIKTNSIKGVPFETRLMECLGEVVVKKLSEQMGSLGKLSHLILHEFEMAYDEKRREIEQRLEDLEKREEEIKNREEANKKKKQELNDMEQQLKEHEKYLLAQFERFRLLPPPSLIKEKNDIDGSNSKTIQWSNQTDIIDTIRGALHAQCNLQYERDVIECFVGALKTNQLIILHGPSGTGKSSLTRGFSKIIKGAKTCTIRVQSSWTDKQDILGFFNPIDYQYVSTEFLDVLVEARENLQSLYLVCLDEMNLSHVEYYFAEFLSAR…	M493_17195	gb|AGT33647.1|	MELWIAKIQSAREHPIQELVKPLEFSRENNCYIASEYEGTIVVKVSNDKVRQVFLSHYGIVSNEKRIPLIYDAQNDVWYDRGNEVEERSPIGINQCGTFFFEAEDKHGFIIDRSSDVYITSSLLTKPEFEQMKDDIAMMLEDLFTADHGPATTVELWAKNGSMAEHILGKLQKLYEVLLELDRMPHEQLIREYRVVPLNQIKQLDSKVLIERKMFPFKDKFLAPVNIRSIDISEHRMMRWSIERVLDYAHRYAAQAQNRQVELSKRIDFLEYSLKNLYGSNNIEKEKIENSLNKDLQYAYEILQITKQSEVFWKQVIELAEKCLEFHFLQVGEEQLGETHLFTFSPLYSEVYQYLDNLLQASPTKQLANIAVPLQKSPKLYEVWCFISIIHSLIYDCGF…	Geobacillus genomosp. 3	Bacillota
Bacillota	Clostridium saccharobutylicum DSM 13864	CP006721.1	CLSA_c21350	gb|AGX43115.1|	MKNEKINLNQEEATILEAQVISTESGFNKENEIIISDELRNEEVNLNNNKDIMITEVNSDEIIKMSNENKIEYLEKNVFKSKFVLGRLNKIRDGKNGKYTFVDLVLPYDINTNYKINGTNWRAFCDFNYVPNDVKQTLNQGDLIYFRPELNSINPHDIIRVNGITVKKLTSYKEFLKKENIELKDVKIGGLVALEREEDIRVWATEEFYRNFGQLHDDLLANVEEEQKKIESIMKEKEKLYKSIQDERDKADKKKKDLEKELERNKKKADQEIKNKEDMLNKKKKEIENLVRKLEYFGFKGFKDNEEQESLLKDNLLDSTFNELFDYIKNYLKYNKKLIYSDDTIRRFLVALQSNELVILSGPSGTGKSSIVTAVAEAIGGVAKIIPVKPSWTESEDLI…	CLSA_c21360	gb|AGX43116.1|	MEIKLVLLDINNGKFEIYKEINEYCENNLCITQYEKNKRNNNFLHLGVKLIDVYNPKDYIVSIGNENYNNLKFNNDVECFYQETIGEDADQIGISKAGFFKVEIRNSERKIVYTSEQILVKPSIISVEMYKQMVDMLLNINKDLVMQDFSNIYLNIEGKKEDLSETVLNFLNNIENLIYNINKNPYVELVKEDAKVSYKKIKKISSKVIIEKELYPFKNKFMSEVARESKDTYENRMICSALLDIKNLIETNLNMNLNYINKINKDIKITTAQINSMCNTPIATQKMSASNAEERAILNLGRNNSSDRLPLPMRPHGNLEYFNDLERKLERLNNTIKLLKDCKANWTSSNNKIDAYLKLEIFKELKMTQKRREKWRTTQVFLHDLTYGKLYRKLKNFCE…	Clostridium saccharobutylicum DSM 13864	Bacillota
Gammaproteobacteria	Escherichia coli PCN061	CP006642.1	PCN061_p6093	gb|AKM38336.1|	MALEQVIYNLEEVKGLSDEELYQRLYDSWGLENHKIDVWGELSINVAGNWAGIRNAKTLSGNQSIEYPLADSHELQSGVFLTPSVAKIVLGNDTKGMVACELMLASIPQRAKKNNPFLLAVNDKTVERLTYLPDALPNLDRQALIQNEDETLLRKVIYDAEVKRVKHKIASETEALEAALQEKQQDMTDKLAELSDAFKSTQDKITASTTELESSIKRNEELNNDNHRLNLKIQESKAELDVIIEKSRKVEESMARKVEKLTDFIKEKAIFLKSFEFLDEEDFDFFVGSPLSNKERGEHISFSQALYSNYSDAVSYIQAYLKERDILYPRHIIENFLTLIRTNDLIILAGDSGSGKTNLVQSFAKAIGGVSKIIPVKPNWTSSEDLLGYYNPLEKKYLA…	PCN061_p6094	gb|AKM38337.1|	METPFVIKFIETKWHDKQTLVSVSESEYSLKLEQTGNNAFSAHTTIYPKVDELRFAQLAIKTKQGDQSPPYIVMPNGDRKQLESITDPASNAVWWVEPAHWDAKQRVWRSEARRTAGQITFVIGNSTLKLDIDISEQTKSDLSRYLSDFKADLWELILDENSHITGDAKNSQVAAIDQEALSLVASILSNAQTILKKPKVELKEIQALKPAKEVRPVPRTFMEICTKGSRKHLTSRASEPSYNVPENQYVLYVVLSTLSIVKQLVKVAESKKSRFSGAIEKLNERLDSLKDYRIINRDLVVKDLERLKKRFDTEVINAELASQLGEINANKYFSQNHAAKGYLRLEKTTGSENEWWAKIKPSQHDDWQQFELDGYTIFSSGEYYASLFQPYSDYDMVAI…	Escherichia coli PCN061	Gammaproteobacteria
Bacillota	Aerococcus urinaehominis	CP014163.1	AWM75_08145	gb|AMB99941.1|	MQEPITSFSDYVQLNRQAKLAYLEDLGLTKNKDFIYLAHFGDTNHFKLLATDMFDLRDLSKKDFSNVVEADQLTIFVSQDDQAKIRQQPEAYFIVVGSFRTSQVSKGQALLQIDQVSQPISQAFADRLLAYDQADINHVYQSLSDKGVLAQASLADQGQVAALLVDILDDYRHFMDQVQTEADQLQAQMTVLGREMQTLAQEEAKLQDLVQDYTQSNWYLPQQMSSQLASKFATANQERLAVDGDLIAKLQGQLYAQAGLLFTEDKLAQVVTSLLANELTILVGPSGTGKSALVKGLAQVMGEAYLNVPVQTTWVDRQDLLGFYNPITNNYQNSALVDFILEAAQPKNSHKFYFVNLDELNLSQIENYFADFLSICDQDQPTISLYSRQVQQGRLTWLA…	AWM75_08150	gb|AMB99942.1|	MASLPIGADDMQVCQIPFKYQQINDYLLDRYQIQADQDVYQFLEYSQSYLALKLDQPADRVEVSGNGAPRQLVIAGPDPASRLVWREDLADKSLLHNTVGESLIQIYYQDGSQDQCQVRLLAKLLDQHRVDRMVADLYQIQEKFFIKDFLSYQTSHRYQWQPTPGQSGLASYSQALVDRLAELMADLKVHVNRLVAEPFVTMQPVMRLTKDQDLGKFDLKRELTRYLQPGRAAYPSRHFENNLSSYENQVIKQSLLDLLAFVDQRQTQEEARDQASHDQAQGDLSQELAGLGLGQVDQLANLSMDQLAGLVAEKIQANQAADQAQVDQIRQTLARAGGHAKQSGRPCWIYFETRGVQDPVSLPGPSISAWQRGLSQTIHYTLNNPGSGLDQSNNLALEQ…	Aerococcus urinaehominis	Bacillota
Alphaproteobacteria	Sphingopyxis macrogoltabida	CP013346.1	ATM17_40655	gb|AMU92990.1|	MEEETQLMELRYRRLKELLSEKRDRLIALGLVDAGDIDAVMWENEAGEEGRSGIRFSEALDSDLSRLAPVLQIELQKKGLLYPQALLRDFLALLRTRDLVVLAGDSGSGKTSLIRAASEAIGGVCTVVPVKPNWTGPEDLLGYYNPVERSYQATPFLVALQDAARQPDVPHFICLDEMNLARVEHYFADFLSLLEQRTDLPTIQLYTADEERHVVVEQGLFLHVEAEARRRAGLGNTATLEDILGNDQANAEIHRLSGLTDKESVLIYHGRLRRSLAAQMRMPTSLTMPANVWIFGAVNMDDTTHQLSPKVLDRVHVLRFGNPMLADWDAIESEIDAAAGTLPADLSGLLIRSDEIGLRQDYPVFDRQDDNVRFLSDVSRRHLDPLGVEFGLRAIRQAQ…	ATM17_40650	gb|AMU92989.1|	MDVLAHYLEIEWETENTPRKLVVSTHPIEIEIARDGVLHAEVSIFRDFAPWMGLHLSGALAEATPETIAAGGQRAPWLKIADEQGRAWWIPATGWSKKTGRHLAEMHRSFGTFQVEIGPRSKLTIDAVALELDRAHAQDYLDDFRDDLVWLAVGQPTGAAARAGSDYSNELVEALADFAQAARRVVEHPSRDVRETTALTATAKLRPSADTFRAVMRRPGAKVYPSRVAVDSADVPENRYVRGLVEHCRRLAHSIARASNRHQGHLAVRAEREKARAAALLAMNVVEIDQEIYDNQLDEVSCVMEAIGAWGPDIAASGRPPREFHFEVGKEFREAGNGPKELFYRNPTRDRVADDQVRIDFSVARLPDALHDLVMAARRIDPGLALTVAGHASLTTFST…	Sphingopyxis macrogoltabida	Alphaproteobacteria
Gammaproteobacteria	Escherichia coli	CP010237.1	RG71_00015	gb|APL73567.1|	MALEQVIYNLEEVKGLSDEELYQRLYDSWGLENHKIDVWGELSINEAGNWAGIRNAKTLSGNQSIEYPLADSHELQSGVFLTPSVAKIVLGNDTKGMVACELMLASIPQRAKKNNPFLLAVNDKTVERLTYLPDALPNLDRQALIQNEDETLLRKVIYDAEVKRVKHKIASETEALEAALQEKQQDMTDKLAELSDAFKSTQDKITASTTELESSIKRNEELNNDNHRLNLKIQESKAELDVIIEKSRKVEESMARKVEKLTDFIKEKAIFLKSFEFLDEEDFDFFVGSPLSNKERGEHISFSQALYSNYSDAVSYIQAYLKERDILYPRHIIENFLTLIRTNDLIILAGDSGSGKTNLVQSFAKAIGGVSKIIPVKPNWTSSEDLLGYYNPLEKKYLA…	RG71_00010	gb|APL73566.1|	METPFVIKFIETKWHDKQTLVSVSESEYSLKLEQTGNNAFSAHTTIYPKVDELRFAQLAIKTKQGDQSPPYIVMPNGDRKQLESITDPASNAVWWVEPAHWDAKQRVWRSEARRTAGQITFVIGNSTLKLDIDISEQTKSDLSRYLSDFKADLWELILDENSHITGDAKNSQVAAIDQEALSLVASILSNAQTILKKPKVELKEIQALKPAKEVRPVPRTFMEICTKGSRKHLTSRASEPSYNVPENQYVLYVVSSTLSIVKQLVKVAESKKSRFSGAIEKLNERLDSLKDYRIINRDLVVKDLERLKKRFDTEVINAELASQLGEINANKYFSTNHAAKGYLRLEKTTGSENEWWAKIKPSQHDDWQQFELDGYTIFSSGEYYASLFQPYSDYDMVAI…	Escherichia coli	Gammaproteobacteria
Bacillota	Clostridium saccharobutylicum	CP016086.1	CLOSC_21290	gb|AQR90412.1|	MKNEKINLNQEEATILEAQVISTESGFNKENEIIISDELRNEEVNLNNNKDIMITEVNSDEIIKMSNENKIEYLEKNVFKSKFVLGRLNKIRDGKNGKYTFVDLVLPYDINTNYKINGTNWRAFCDFNYVPNDVKQTLNQGDLIYFRPELNSINPHDIIRVNGITVKKLTSYKEFLKKENIELKDVKIGGLVALEREEDIRVWATEEFYRNFGQLHDDLLANVEEEQKKIESIMKEKEKLYKSIQDERDKADKKKKDLEKELERNKKKADQEIKNKEDMLNKKKKEIENLVRKLEYFGFKGFKDNEEQESLLKDNLLDSTFNELFDYIKNYLKYNKKLIYSDDTIRRFLVALQSNELVILSGPSGTGKSSIVTAVAEAIGGVAKIIPVKPSWTESEDLI…	CLOSC_21300	gb|AQR90413.1|	MEIKLVLLDINNGKFEIYKEINEYCENNLCITQYEKNKRNNNFLHLGVKLIDVYNPKDYIVSIGNENYNNLKFNNDVECFYQETIGEDADQIGISKAGFFKVEIRNSERKIVYTSEQILVKPSIISVEMYKQMVDMLLNINKDLVMQDFSNIYLNIEGKKEDLSETVLNFLNNIENLIYNINKNPYVELVKEDAKVSYKKIKKISSKVIIEKELYPFKNKFMSEVARESKDTYENRMICSALLDIKNLIETNLNMNLNYINKINKDIKITTAQINSMCNTPIATQKMSASNAEERAILNLGRNNSSDRLPLPMRPHGNLEYFNDLERKLERLNNTIKLLKDCKANWTSSNNKIDAYLKLEIFKELKMTQKRREKWRTTQVFLHDLTYGKLYRKLKNFCE…	Clostridium saccharobutylicum	Bacillota
Bacillota	Clostridium saccharobutylicum	CP016089.1	CSACC_21360	gb|AQS00318.1|	MKNEKINLNQEEATILEAQVISTESGFNKENEIIISDELRNEEVNLNNNKDIMITEVNSDEIIKMSNENKIEYLEKNVFKSKFVLGRLNKIRDGKNGKYTFVDLVLPYDINTNYKINGTNWRAFCDFNYVPNDVKQTLNQGDLIYFRPELNSINPHDIIRVNGITVKKLTSYKEFLKKENIELKDVKIGGLVALEREEDIRVWATEEFYRNFGQLHDDLLANVEEEQKKIESIMKEKEKLYKSIQDERDKADKKKKDLEKELERNKKKADQEIKNKEDMLNKKKKEIENLVRKLEYFGFKGFKDNEEQESLLKDNLLDSTFNELFDYIKNYLKYNKKLIYSDDTIRRFLVALQSNELVILSGPSGTGKSSIVTAVAEAIGGVAKIIPVKPSWTESEDLI…	CSACC_21370	gb|AQS00319.1|	MEIKLVLLDINNGKFEIYKEINEYCENNLCITQYEKNKRNNNFLHLGVKLIDVYNPKDYIVSIGNENYNNLKFNNDVECFYQETIGEDADQIGISKAGFFKVEIRNSERKIVYTSEQILVKPSIISVEMYKQMVDMLLNINKDLVMQDFSNIYLNIEGKKEDLSETVLNFLNNIENLIYNINKNPYVELVKEDAKVSYKKIKKISSKVIIEKELYPFKNKFMSEVARESKDTYENRMICSALLDIKNLIETNLNMNLNYINKINKDIKITTAQINSMCNTPIATQKMSASNAEERAILNLGRNNSSDRLPLPMRPHGNLEYFNDLERKLERLNNTIKLLKDCKANWTSSNNKIDAYLKLEIFKELKMTQKRREKWRTTQVFLHDLTYGKLYRKLKNFCE…	Clostridium saccharobutylicum	Bacillota
Bacillota	Clostridium saccharobutylicum	CP016092.1	CLOSACC_21360	gb|AQS14301.1|	MKNEKINLNQEEATILEAQVISTESGFNKENEIIISDELRNEEVNLNNNKDIMITEVNSDEIIKMSNENKIEYLEKNVFKSKFVLGRLNKIRDGKNGKYTFVDLVLPYDINTNYKINGTNWRAFCDFNYVPNDVKQTLNQGDLIYFRPELNSINPHDIIRVNGITVKKLTSYKEFLKKENIELKDVKIGGLVALEREEDIRVWATEEFYRNFGQLHDDLLANVEEEQKKIESIMKEKEKLYKSIQDERDKADKKKKDLEKELERNKKKADQEIKNKEDMLNKKKKEIENLVRKLEYFGFKGFKDNEEQESLLKDNLLDSTFNELFDYIKNYLKYNKKLIYSDDTIRRFLVALQSNELVILSGPSGTGKSSIVTAVAEAIGGVAKIIPVKPSWTESEDLI…	CLOSACC_21370	gb|AQS14302.1|	MEIKLVLLDINNGKFEIYKEINEYCENNLCITQYEKNKRNNNFLHLGVKLIDVYNPKDYIVSIGNENYNNLKFNNDVECFYQETIGEDADQIGISKAGFFKVEIRNSERKIVYTSEQILVKPSIISVEMYKQMVDMLLNINKDLVMQDFSNIYLNIEGKKEDLSETVLNFLNNIENLIYNINKNPYVELVKEDAKVSYKKIKKISSKVIIEKELYPFKNKFMSEVARESKDTYENRMICSALLDIKNLIETNLNMNLNYINKINKDIKITTAQINSMCNTPIATQKMSASNAEERAILNLGRNNSSDRLPLPMRPHGNLEYFNDLERKLERLNNTIKLLKDCKANWTSSNNKIDAYLKLEIFKELKMTQKRREKWRTTQVFLHDLTYGKLYRKLKNFCE…	Clostridium saccharobutylicum	Bacillota
Bacillota	Geobacillus thermodenitrificans	CP017694.1	GD3902_07205	gb|ARA97863.1|	MTEITEDKELLSYVDSFQDMQNFLLNEENIIDTDVIEKVILFIREGTKNRRKKNFKTYFENIEMNIDTIKSWVNILEKLKDAIKNEEIGSIKDLKNHLISQGILKFNQKYLDTFSISGRQKYLNWLNNQLGDLKNKLLEAYRNNLLNSELVSEFVTEFKKYLNGRLLLKIVSIDTKQIIGVPIHLNKNGDVEMLPHPFLDSEWELSRSIDTLKDKERIKVGDIVAAYFTDNKNERYMHTLLYVDFDGAQILSQTLQQALSEFVDNEYIEAYMEKIRKIFGIDDKNDEQIATLIMQKLLDISSDIRQKLLKERDGIRREKEKLLIEEKELDEKRREWFHIMKKIDEMIEIEEQTTPNKNETYTVIEYEREQFISHLQSLFYYNDDQHLIYKEEIIKTFIY…	GD3902_07200	gb|ARA97862.1|	MKLYHVAKEKDRLVIYDELQFDGSTYFTCEYNKIKKRITQIGVCVENASRIVVRQFDIEVARLTFDEESGIWYHKEEEWMEDGFPKTTDSIFGINAGGSFDVIAYDEEGNEITKATVMITPGTMSIEEYQQMQQEVRRLFELFSYDLAQIDYNNQNCLRRIQMPLYPQQQFQELFDQFFDCFNEILKMPEQELIQVEKKINLHQVKKWTTFMIIENEIRKNGKIMALISEKTTDIKEHRMIRFMVEEFQQRIDMELTAEQKQLSSLQNELQQLEEVEKMEQSSSLSSNFRSLIEIVRSDCEKLQRRICIWREMKDKVSELLNQPLLQCEPQVIEETHLFRMHPVYSELYSIYVAYENLSPRLSETFRLFIQSIVKSPTLYEIWILLKIIEQMSQWGVNQ…	Geobacillus thermodenitrificans	Bacillota
Bacillota	Geobacillus thermodenitrificans	CP020030.1	GTHT12_02820	gb|ARP44316.1|	MENNARKLQDHLNSILNELGSPINWTQEDAHQFYVKFCDPQLLSSRLILEIISVRELKNNNLLLKAAVLNRDTLTPFILPFSNDKWVVSFIVQKNGPEYKRGEILTALAEELKFNELPDEKDKRERRKLGMIFINVNSIQRASFETSLMAHFGEEIVKRIAERLGPLEKIAPLIVSHLQSQIKDEILILEAELNQRRNELLANLREQEMKLQEEYRWKEEQFDKEKSKLDQKLKRLEGQKKLISDEESLLDKRKQEIEEQKEALSKEAQRLEEYKRSLKSQFERFRLVHPLLGDEDNAISNDQTIHWSDQEDIIATIQGALHAQCNLQYERDIIECFIGALKTNQLIILHGPSGTGKSSLARGFSKIIKGAKTYTIRVQSSWTDKQDILGFFNPIDYQY…	GTHT12_02819	gb|ARP44315.1|	MELWIAEIKSTSKRPIQRLVSPLIFNEESNCYIASEYEGTIVVKTSNHKVQKVFLSHYGVTANEQRIPLIYDEQWDVWYDKGDEFEERSPIGINQCGTFFFEAEDGDGYIIGRSADVSITSSLLTEEEFQQMKDEIVSMLEDLFTANKGPATPMKLWRENVEVARYALDQMKKLHEVLLELEEAPHEQLIREHHLITSSKIKRFNAEFLINRKLFPFKDKFLIPVNVRSIDIPEHRMIRWGLERLIDYADRYLRQARNRKRDLYQRRDFLTHALSNQHDHRLGLFEEERIRNSIKKDLDYVSESLQLVCKSERYWKEIGEIAKNCLSLHYLNVGEEELEQTHLFTFSPLYSEAYQYLDDLLNLKPLKQLSNTYVPLQKSPKLYEIWCLLSIIHSLIYEC…	Geobacillus thermodenitrificans	Bacillota
Gammaproteobacteria	Klebsiella pneumoniae	CP027603.1	AM459_27315	gb|AVO80801.1|	MALEQVIYNLEEVKGLSDEELYQRLYDSWGLENHKIDVWGELSINEAGNWAGIRNAKTLSGNQSIEYPLADSHELQSGVFLTPSVAKIVLGNDTKGMVACELMLASIPQRAKKNNPFLLAVNDKTVERLTYLPDALPNLDRQALIQNEDETLLRKVIYDAEVKRVKHKIASETEALEAALQEKQQDMTDKLAELSDAFKSTQDKITASTTELESSIKRNEELNNDNHRLNLKIQESKSELDVIIEKSRKVEESMARKVEKLTDFIKEKAIFLKSFEFLDEEDFDFFVGSPLSNKERGEHISFSQALYSNYSDAVSYIQAYLKERDILYPRHIIENFLTLIRTNDLIILAGDSGSGKTNLVQSFAKAIGGVSKIIPVKPNWTSSEDLLGYYNPLEKKYLA…	AM459_27320	gb|AVO80802.1|	MEAPFVIKFIETKWHDKQTLVSVSESEYSLKLEQTGNNAFSAHTTIYPKVDELRFAQLAIKTKQGDQSPPYIAMPNGERRQLESITDPASNEEWWVEPAHWDAKQRVWRSEARRTAGQIMFVIGSSTLKLDIDISEQTKSDLSRYLSDFKADLWELILDESSHITGDAKNSQVAAIDQEALSLVASILSNAQTILKKPKVELKEIQALKPAKEVRPVPRTFMEICTKGSRKHLTSRASEPSYNVPENQYVLYVVSSTLSIVKQLVKVAESKKSRFSGAIEKLNERLDSLKDYRIINRDLVVKDLERLKKRFDTEVINAELSEQLAKINVNLSRSYSEKGYLRLEKATGSENEWWAKIKPSQNDDWQQFEPDGYTIFSSRDHYASLFKSYSDYEIEAKIP…	Klebsiella pneumoniae	Gammaproteobacteria
Gammaproteobacteria	Klebsiella pneumoniae	CP024875.1	CU111_27420	gb|AVT91655.1|	MALEQVIYNLEEVKGLSDEELYQRLYDSWGLENHKIDVWGELSINEAGNWAGIRNAKTLSGNQSIEYPLADSHELQSGVFLTPSVAKIVLGNDTKGMVACELMLASIPQRAKKNNPFLLAVNDKTVERLTYLPDALPNLDRQALIQNEDETLLRKVIYDAEVKRVKHKIASETEALEAALQEKQQDMTDKLAELSDAFKSTQDKITASTTELESSIKRNEELNNDNHRLNLKIQESKSELDVIIEKSRKVEESMARKVEKLTDFIKEKAIFLKSFEFLDEEDFDFFVGSPLSNKERGEHISFSQALYSNYSDAVSYIQAYLKERDILYPRHIIENFLTLIRTNDLIILAGDSGSGKTNLVQSFAKAIGGVSKIIPVKPNWTSSEDLLGYYNPLEKKYLA…	CU111_27415	gb|AVT91654.1|	MEAPFVIKFIETKWHDKQTLVSVSESEYSLKLEQTGNNAFSAHTTIYPKVDELRFAQLAIKTKQGDQSPPYIAMPNGERRQLESITDPASNEEWWVEPAHWDAKQRVWRSEARRTAGQIMFVIGSSTLKLDIDISEQTKSDLSRYLSDFKADLWELILDESSHITGDAKNSQVAAIDQEALSLVASILSNAQTILKKPKVELKEIQALKPAKEVRPVPRTFMEICTKGSRKHLTSRASEPSYNVPENQYVLYVVSSTLSIVKQLVKVAESKKSRFSGAIEKLNERLDSLKDYRIINRDLVVKDLERLKKRFDTEVINAELSEQLAKINVNLSRSYSEKGYLRLEKATGSENEWWAKIKPSQNDDWQQFEPDGYTIFSSRDHYASLFKSYSDYEIEAKIP…	Klebsiella pneumoniae	Gammaproteobacteria
Gammaproteobacteria	Acinetobacter junii	CP028800.2	CDG57_07990	gb|AWA47933.1|	MENQITYTLQQLKNLNDDQIFLELKKIWGYKENESLRVIGQINRKSNFSQIYTLSNLKDSKGNSLLYPLENFKEDHGCFIGLSLPNTVEIGQWVQATLKLAPKKEREKHSNPFELNVQISSLKKLVEIPSKVIEDGIHDDLIENWVIEYFAEKNAEEITEKNKSVLMQHEILLKKEEELEKNLKSLEKKEISFLDKLAKNQEKIELCKLELEENKELVNAEKVELKKNKDLIIQAQAELISLKHQKEEILNKLNNFIEEKVNILRELEIIDEDSLHKLIGKNNTPVQLETHYLLGKDIKDIEEVIKHIQAYLYNKGTMYRRNILENFYTLLSTRDLIILAGDSGAGKTNLVKSFAEATGGKHYIIPVKPNWTSSEDLLGYYNPVEQNYLSTPFLTALID…	CDG57_07985	gb|AWA47932.2|	MLISARYIDVEWNATKQVKKVFYGSPIEIIKKSENNFFIETITFPKRFFYFAFRIEEPISNPPYFLFNEIKEDLLEIIDPKTGENWWIAKGRWISESKKRNYGNKYVHESFRTAGRLELHINDITIEISNRTNNFSVEEMEFFLTDFKNELWSIILNSESVVNAELQKSTPNIFNEDTILYVENCLNSVQKILNDPKFFLVENQQLVIKKKVKPVRRTFRELTTKPNSKTFTSRIHDKSYNNSENRYIHFCTEKLFFIFNKMLQVVERSNIQFSNMAKIYFEESDRLKNNDFKIIDKDLFIQEAYEIKQRSLNFYTELEKLNNNLLPSFLDEILKLNSKILNRNESGNEKLITYRFTLDQIFEYLDHSIQSRFLNGKEFETHPEYHIYNGKYLVVEFPD…	Acinetobacter junii	Gammaproteobacteria
Gammaproteobacteria	Klebsiella aerogenes	CP028952.1	AM407_26165	gb|AWD06420.1|	MALEQVIYNLEEVKGLSDEELYQRLYDSWGLENHKIDVWGELSINEAGNWAGIRNAKTLSGNQSIEYPLADSHELQSGVFLTPSVAKIVLGNDTKGMVACELMLASIPQRAKKNNPFLLAVNDKTVERLTYLPDALPNLDRQALIQNEDETLLRKVIYDAEVKRVKHKIASETEALEAALQEKQQDMTDKLAELSDAFKSTQDKITASTTELESSIKRNEELNNDNHRLNLKIQESKSELDVIIEKSRKVEESMARKVEKLTDFIKEKAIFLKSFEFLDEEDFDFFVGSPLSNKERGEHISFSQALYSNYSDAVSYIQAYLKERDILYPRHIIENFLTLIRTNDLIILAGDSGSGKTNLVQSFAKAIGGVSKIIPVKPNWTSSEDLLGYYNPLEKKYLA…	AM407_26160	gb|AWD06419.1|	MEAPFVIKFIETKWHDKQTLVSVSESEYSLKLEQTGNNAFSAHTTIYPKVDELRFAQLAIKTKQGDQSPPYIAMPNGERRQLESITDPASNEEWWVEPAHWDAKQRVWRSEARRTAGQIMFVIGSSTLKLDIDISEQTKSDLSRYLSDFKADLWELILDESSHITGDAKNSQVAAIDQEALSLVASILSNAQTILKKPKVELKEIQALKPAKEVRPVPRTFMEICTKGSRKHLTSRASEPSYNVPENQYVLYVVSSTLSIVKQLVKVAESKKSRFSGAIEKLNERLDSLKDYRIINRDLVVKDLERLKKRFDTEVINAELSEQLAKINVNLSRSYSEKGYLRLEKATGSENEWWAKIKPSQNDDWQQFEPDGYTIFSSRDHYASLFKSYSDYEIEAKIP…	Klebsiella aerogenes	Gammaproteobacteria
Bacillota	Bacillus mobilis	CP031443.1	MLA2C4_04965	gb|AYF05057.1|	MVQSIAKDSFTKEEVQNYEDALNSLKYFLLEDNDEIKVEHVDTVYEFLSHSTNTKRQDKQLFAHYLQDIPPEEVKKMKMVLKKLKKGIKENTKGPVEESKKKLIEYGALNFCSVFLTNPLLHEEKEMIAITENNLKDSGMKTIINQTHLHDKKSKRYDEWLSTEAAQVVTELRTADENNELSALHVNKFVKLFKKYSQGRLLFRINGYIQTEETVRIYGTPMEWTNEGIVPLNHPWKIEDWSISRNNIKAHRVAHLKQNDLVLVNFSGTQNTHFLASLLFIDFTTAEVVPLSLEQSLQEIGGTAFVKQLKDNMNVNTSEEIEAIIIQRLLNVNQELKNQLEKEQQEFVLQQQKLSEEQQVWKRIFYKIEQSIAFEQKEAEADEVQIHPYKEETFCKQVQ…	MLA2C4_04960	gb|AYF05056.1|	MKIIHIVLKDSEIQAYDELTKSEGIFLASEYTKKDKMTAQIGVIEPAASKVLIEQFKQPVATLTKDTKTNIWYHKPSKWLADGFEQSTDSIFGINAGGSFDIVAYDVDNLELARAQVIITPGTISIKEYALMQQEVRRLFELFSYDLARESIDNKNILKQTQTKLFNVYKLEEILNEFSDWFLQLVQQPAEQLIHTTKKVALIQLKKWTPKVILEQTLRPDHKVRANVIEKSTAIAEHGMLRLMLEQIKQRIDCESQAEEILINELTDEMIQLSQVIKDKTNHLQEAILALQQVVKQDLIILKARKSIWFQLNSDVQKWLDEPLMDVSPVEIEETHVFSMNPVYSAVYDSYLKFNELQPKLFEAIRPFIQSILKSPTLYEIWIFLKITQQLHQWGVNTD…	Bacillus mobilis	Bacillota
Bacillota	Bacillus mobilis	CP031443.1	MLA2C4_06670	gb|AYF05382.1|	MVQSIAKDSFTKEEVQNYEDALNSLKYFLLEDNDEIKVEHVDTVYEFLSHSTNTKRQDKQLFAHYLQDIPPGEVKKMKMVLKKLKKGIKENTQGPVEESKKKLIEYGVLNFCSAFLTKPLLHEEKEMIAITENSLKDSEMKTIINQTQLHNKEPKRYDEWLSTEAAQVVTELRTADENNELSALHVNKFVKLFKKYSQGRLLFHINGYIQTEETVRIYGTPMEWTNEGIVPLNHPWKIEEWSISRNNIKAHRVAHLKQNDLVLVNFSGTQNTHFLASLLFIDFTTAEVVPLSLEQSLQEIGGTAFVKQLKDNMSVNTSEEIEAIIIQRLLNVNQELKNQLEKEQQEFVLQQQKLSEEQQMWRRIFYKIEQAIAFEQKEAKVDEVQIHPYKEETFCKQVQ…	MLA2C4_06665	gb|AYF05381.1|	MKIIHIVLKDREIQAYDELTKSEGIFLASEYTKKDKMTAQIGVIEPAASKVLIEQFKQPVATLTKDNKTNIWYHKPSKWLADGFEQSTDSIFGINAGGSFDIVAYDVDNLELARAQVNITPGTISIKEYAFMQQEVRRLFELFSYDLARESIDNKNILKQTQTKLFNVYKLEEILNEFSDWFLQLVQEPAEQLIHTTKKVALIQLKKWTPKVILEQTLRPDHKVRANVIEKSTAIAEHGMLRLMLEQIKQRIDCESQAEEILINELTDEIVQLSQVIKDKTNHLQEAILALQQVVKQDLITLKARKSIWFQLNSDVQKWLDEPLMDVSPVEIEETHVFSMNPVYSAVYDSYLKFNELQPKLFEAIRPFIQSILKSPTLYEIWIFLKITQQLHQWGVNTD…	Bacillus mobilis	Bacillota
Deinococcota	Deinococcus psychrotolerans	CP034187.1	EHF33_19820	gb|AZI45165.1|	MAQSIQIKSGAGNLKDTFRAVVLQQVQNNEISIKGEGNKSGLAFVLGGARFEIGDIVKVERGKGKWIVQDKPLPFHEITTIDHPTEKGLSGEPILRENRGDAFRIGNRRFYENLNDAAQDVSVWIFKDVIAETNYICQILQDGPQISGVQLSSKALKMLGGLGANLGELEKATETYKQSKKDADDAIDRTLQRQSEIDSQLKDDESRLENVRSQLDHWESVRKELPEKEKELGKINQALESHLERLHQREQATGDQRAVLRCLIPFDDEAEALKIAGQKLAGRVDESQLLSVHLALKHAPFTVLTGPSGAGKTSLLLEYATALGIHVTPVAVQPNWTGVQNLHGYADPLGGAHYRETPFSAALQAQVEYADANDLKAPLDLILLDEINLSFVEYFLADY…	EHF33_19815	gb|AZI45164.1|	MATDAQKLNWARVALSDRKIDQIDQMVEFLGSQEFRLSHRETENSNLPEHVQEIRADIARFTQQWTALEERVREILQQPAESLTTELQEIHLSSHFRLGPAALIRNVQDRRIQRQDGKWFVSGETLWADVERTSLDTAENAHLVMVLRAYEDVRQQLSLNLKREVSEYASRAEEAEKQGSPPRRRLFKNLENRAIRELESLQSLLCFDLPEVWWQFISTPTRENNRTNFDERYRSVADLEDRLSELIKKGASPERRQQIVNLGQRRPWEIYEFWMIAKVCELLERLGFTPDLKDGFAALESSGGPRYGLRTGAQLVYARPDLSIRLSVQWQEDDDRPDLKLDLLSIEGSVFPLFLDAKCKRYVVFSEAAHDLQESARRYAAPSDGTGFLLHPSTLRAWP…	Deinococcus psychrotolerans	Deinococcota
Gammaproteobacteria	Escherichia coli	CP034746.1	EM855_22150	gb|AZU73952.1|	MALEQVIYNLEEVKGLSDEELYQRLYDSWGLENHKIDVWGELSINVARNWAGIRNAKTLSGNQSIEYPLADSHELQSGVFLTPSVAKIVLGNDTKGMVACELMLASIPQRAKKNNPFLLAVNDKTVERLTYLPDALPNLDRQALIQNEDETLLRKVIYDAEVKRVKHKIASETEALEAALQEKQQDMTDKLAELSDAFKSTQDKITASTTELESSIKRNEELNNDNHRLNLKIQESKAELDVIIEKSRKVEESMARKVEKLTDFIKEKAIFLKSFEFLDEEDFDFFVGSPLSNKERGEHISFSQALYSNYSDAVSYIQAYLKERGILYPRHIIENFLTLIRTNDLIILAGDSGSGKTNLVQSFAKAIGGVSKIIPVKPNWTSSEDLLGYYNPLEKKYLA…	EM855_22155	gb|AZU73953.1|	METPFVIKFIETKWHDKQTLVSVSESEYSLKLEQTGNNAFSAHTTIYPKVDELRFAQLAIKTKQGDQSPPYIVMPNGDRKQLESITDPASNAVWWVEPAHWDAKQRVWRSEARRTAGQITFVIGNSTLKLDIDISEQTKSDLSRYLSDFKADLWELILDENSHITGDAKNSQVAAIDQEALSLVASILSNAQTILKKPKVELKEIQALKPAKEVRPVPRTFMEICTKGSRKHLTSRASEPSYNVPENQYVLYVVLSTLSIVKQLVKVAESKKSRFSGAIEKLNERLDSLKDYRIINRDLVVKDLERLKKRFDTEVINAELASQLGEINANKYFSQNHAAKGYLRLEKTTGSENEWWAKIKPSQHDDWQQFELDGYTIFSSGEYYASLFQPYSDYDMVAI…	Escherichia coli	Gammaproteobacteria
Cyanobacteriota	Pseudanabaena sp. ABRG5-3	AP017560.1	ABRG53_0403	gb|BBC22660.1|	MTELNQDPFDARWLNCLYGGKLAGRAKVVTDVFIFIEPLLEITLQDGSKTRKFFGLKRNCKATSIAKDDFVIFEWQKVGERSYDRKRDGEGDPEAIEIEVTSKEVAEELTNQLKGLLPSELRSHWYKYLEALNQKAESINQQVEDLAIVRTSEKIIELEESKKQLIREEEFLKQKEKELEMREIAINQQVEDLAIVRTSEKNIELEEYKKQLIREEEFLKQKEKELEMRRIAIPEEVSKRTAQFTKQVKENISELKSEQESVKKQQEDLNLQQQNLNQEAEKLAVERTREIQEQIEAKQKQLTRDNQSLADRTKQFLARQEQLKQQESQLLEIRQQIEPYRLAVPAEIISNQSIESLQLPNKLGAKWHPQLQKEGLQVSRNIANSFLLSMLSGFYSGGI…	ABRG53_0404	gb|BBC22661.1|	MANYPTIKFVDDRRNTLPIDEDGLQHISQFRQSWQICLSDRWLGKVRLLGNLNIDLLNITKTNYWQFKNNQIPPSIISSAGIVTVILIDEKGNPIEVTKTRLAIHPASLTDSQLDRMIADIGTLALSVSSCVNREVKIPTALASGKTDYGQKWSPYQGMLTTADALIELTLVMQQNWGALEKRSLKDIETTIGKVSRSRVYTSPKLLIRAYSQPAKQNFMGMVRIETTNCSENQFLCYLLDIYLQDVVKGVISGLKALTIDNVESRLIPSRRSDPDFTKFRDNIQKTVDQRTQRINQFELSVKEKIKQLQECQIWAKYARNSSFLRNISTPHTLPNHSLRLTGSPAYGSIYACYSSSQGHLLENLQQQILSFENLAPKNIKPVWEIYEIWCFVSIYSAF…	Pseudanabaena sp. ABRG5-3	Cyanobacteriota
Cyanobacteriota	Nostoc sp. HK-01	AP018322.1	NIES2109_64070	gb|BBD63532.1|	MSLYDFSPELVAKTIGVDYHSLIELLEQVDEIYRDFKIPKKSGGVRTIRTPRSTEYEDGDITLLDIQKKISKEILQPVYQPKPCVHGFTAKKSIVTNAKAHTKKKYVLNLDIQDFFTSIKFERVRKMFMAQPYNANDEVANLLAQICCYEDQLPQGAPTSPIVSNMVCAKMDGQLLDIARQYKATYTRYADDITFSTNLEEFPEALGYVVNEGSIRRFFVGHELQEIFNSNNFEVNERKVRLQTQNCRQEVTGLTVNHFPNVNRQFVRQIRAMLYAWQKFGINNAASEYISKYGRYGEFYKIILNYKSGVEAKRFHHVLRGKIEFLGLVRGKNDPIYKKYLAQYKRLLYEEIAQEPRLPSVLKTKGWQEGRLSLNNHDWNANIRKRGLLLPNYIKTSYL…	NIES2109_64060	gb|BBD63531.1|	MAYPKIYFADSTGELPWEDDVQHTRQYSGRWYVQIEGFWDGSVGLKGDSIIPLLKISSNRWELPQRTKHEREISKGVASRTGQITAILLDASGKPVDSSPEAFLLVKPAGLTEQELEQLITEIGLLALSTSSCVTSQLQVSVGEDVETAMIGMGCSDSRGLLLTATSLLKLASVVQSNWVIIEKRPLKSFSRELGLVDTRKLINSSQVLIKAKIDTSKQKILALTQVESTQCSENEFLCYVLDVYLRDLVIGIVNLLEQLEIDDTFSPLNYAKEPAILSFLARAKERVQKFNQQREEERKTISKIVAQLQECAEWATYARNSPFLKNVLTPTEPPLPSQRLIGSPAYASIFEESMNCESSIFYKIQPVITLFKATYQGQVRSTWELYEIWCFVSLYNAF…	Nostoc sp. HK-01	Cyanobacteriota
Gammaproteobacteria	Klebsiella quasipneumoniae	AP022144.1	WP5S18E05_P20860	gb|BBS50031.1|	MDEEDFDFFVGSPLSNKERGEHISFSQALYSNYSDAVSYIQAYLKERDILYPRHIIENFLTLIRTNDLIILAGDSGSGKTNLVQSFAKAIGGVSKIIPVKPNWTSSEDLLGYYNPLEKKYLATPFLEALIEAKQNPDIPYFICLDEMNLARVEYYFADFLSKLEERNEQPTIQLYSDDEAAHVLAELKGVVSVISNAQEKFSKNGIVDFVALMQDEEINAEMKRAFGFSDKDSLIKYHGDIRRMLAGVLGTPSSITIPANVRIIGAINIDETTHYLSPKILDRAHVMKFKSPLLTDWDAIFDEIDSYGLDDVTLPLVFDIEELGERTPYPKFERLNEFCELFTTLNRDVFDPLGVEFGMRTIRQGLNYVSLFSDVNDNKSLAINNFIVHKVLPKFTFDG…	WP5S18E05_P20850	gb|BBS50030.1|	MEAPFVIKFIETKWHDKQTLVSVSESEYSLKLEQTGNNAFSAHTTIYPKVDELRFAQLAIKTKQGDQSPPYIAMPNGERRQLESITDPASNEEWWVEPAHWDAKQRVWRSEARRTAGQIMFVIGSSTLKLDIDISEQTKSDLSRYLSDFKADLWELILDESSHITGDAKNSQVAAIDQEALSLVASILSNAQTILKKPKVELKEIQALKPAKEVRPVPRTFMEICTKGSRKHLTSRASEPSYNVPENQYVLYVVSSTLSIVKQLVKVAESKKSRFSGAIEKLNERLDSLKDYRIINRDLVVKDLERLKKRFDTEVINAELSEQLGKVRTSP	Klebsiella quasipneumoniae	Gammaproteobacteria
Bacillota	Aeribacillus pallidus	AP022323.1	APP_33220	gb|BBU41030.1|	MTEITEDKELLSYVDSFQDMQNFLLNEENIIDIDVIEKVILFIREGTKNRRKKNFKTYFENIEMNIDTIKDWGNILEKLIDAIKHQEINSIKELKDHLILQGMLGFNRKYLDTFSISGRQKYLNWLNNQIGDLKNKLLEAYRNNSLNSELVGEFVTEFKKYLNGRLLLKIVNIDTKQIIGVPIHLNKNGDVEMLPHPFLDSEWELSRSIDTLKDKERIKVGDIVAAYFTDNKSERYMHTLLYVDFDGAEILPQTLQQALSEFVDNEYIEQYMEKIRKIFGIDDKNDEQIATLILQKLLDISSDIRQKLLEERDEIRKEKEKLLIEEKELDEKRREWYRIMKKIDEMIEIEEQTTPNKNETYTVIEYEPEQFISHLQSLFYYNDDQHLIYKEEIIKTFIY…	APP_33210	gb|BBU41029.1|	MKLYHVAKEKDRLVIYDELQFDGSTYFTCEYNKIKKRMTQIGVCVENASRIVVKQFDIEVARLTFDEESGIWYHKEKEWMEDGFPKTTDSIFGINAGGSFDVIAYDEDGNEITKATVMITPGTMSIEEYQQMQQEVRRLFELFSYDLAQIDYNDQNCLRRVQMPLYPQQQFQELFDQFFDCFNEILKMPEQELIQVEKKINLHQVKKWTTSMIIENEIRKNGKVTALISEKTTDIKEHRMIRFMVEEFQQRIDMELTAEQKQLSSLQNELQQLEEVEKMEQSSSLSSNFRSLIEIVRSDCEKLQRRICIWREMKDKVSELLNQPLLQCEPQVIEETHLFRMHPVYSELYSIYVAYENLSPRLSETFRLFIQSIVKSPTLYEIWILLKIIEQMSQWGVNP…	Aeribacillus pallidus	Bacillota
Gammaproteobacteria	Klebsiella pneumoniae subsp. pneumoniae	AP025034.1	E3AUHO_50030	gb|BDA92317.1|	MTLEQVIYNLEEVKGLSDEELYQRLCESWGITNGKLAVWGKILNGPDSDSRKLPTRLLEIKSLQTGLDTEYPINVRLTMDKGVFVSFKSVEELFGLEDGSFVSCELALAPQSEREKHENPFECNVVVSSVRRLIKLPEYTANDIIKGDENIFLDDAVYKLHLQNVQSRIDSEVTALNAEFEREESSLKAQISSYKDQLQHVQDDLNQKNNVLSQAIAKAQKLEVEHSEWQHKIALQKKAEETMSKKIERLKAYVKSKAGFLKSFEFLDDDDFDLFVGSTLSNKDRDEHISFSQAFDSNYSDAVSYIQAHLKERDILYPRHIIENFLTLIRTHDLIILAGDSGSGKTNLVQSFAKAIAGVSKIIPVKPNWTSSEDLLGYYNPLEKKYLVTPFLEALIEAK…	E3AUHO_50020	gb|BDA92316.1|	MEAPFVIKFIETKWHDKQTLVSVSESEYSLKLEQTGNNAFSAHTTIYPKVDELRFAQLAIKTKQGDQSPPYIVMPNGDRKQLESITDPASNAVWWVEPAHWDAKQRVWRSEARRTAGQITFVIGNSTLKLDIDISEQTKSDLSRYLSDFKADLWELILDENSHITGDAKNSQVAAIDQEALSLVASILSNAQTILKKPKVELKEIQALKPAKEVRPVPRTFMEICTKGSRKHLTSRASEPSYNVPENQYVLYVVSSTLSIVKQLVKVAESKKSRFSGAIEKLNERLDSLKDYRIINRDLVVKDLERLKKRFDTEVINAELSEQLAKINVNLSRSYSEKGYLRLEKATGSENEWWAKIKPSQNDDWQQFEPDGYTIFSSRDHYASLFKSYSDYEIEAKIP…	Klebsiella pneumoniae subsp. pneumoniae	Gammaproteobacteria
Gammaproteobacteria	Klebsiella pneumoniae	CACSIE010000082.1	IMFIAIPH_05137	gb|CAA0335103.1|	MALEQVIYNLEEVKGLSDEELYQRLYDSWGLENHKIDVWGELSINEAGNWAGIRNAKTLSGNQSIEYPLADSHELQSGVFLTPSVAKIVLGNDTKGMVACELMLASIPQRAKKNNPFLLAVNDKTVERLTYLPDALPNLDRQALIQNEDETLLRKVIYDAEVKRVKHKIASETEALEAALQEKQQDMTDKLAELSDAFKSTQDKITASTTELESSIKRNEELNNDNHRLNLKIQESKSELDVIIEKSRKVEESMARKVEKLTDFIKEKAIFLKSFEFLDEEDFDFFVGSPLSNKERGEHISFSQALYSNYSDAVSYIQAYLKERDILYPRHIIENFLTLIRTNDLIILAGDSGSGKTNLVQSFAKAIGGVSKIIPVKPNWTSSEDLLGYYNPLEKKYLA…	IMFIAIPH_05138	gb|CAA0335120.1|	MEAPFVIKFIETKWHDKQTLVSVSESEYSLKLEQTGNNAFSAHTTIYPKVDELRFAQLAIKTKQGDQSPPYIAMPNGERRQLESITDPASNEEWWVEPAHWDAKQRVWRSEARRTAGQIMFVIGSSTLKLDIDISEQTKSDLSRYLSDFKADLWELILDESSHITGDAKNSQVAAIDQEALSLVASILSNAQTILKKPKVELKEIQALKPAKEVRPVPRTFMEICTKGSRKHLTSRASEPSYNVPENQYVLYVVSSTLSIVKQLVKVAESKKSRFSGAIEKLNERLDSLKDYRIINRDLVVKDLERLKKRFDTEVINAELSEQLAKINVNLSRSYSEKGYLRLEKATGSENEWWAKIKPSQNDDWQQFEPDGYTIFSSRDHYASLFKSYSDYEIEAKIP…	Klebsiella pneumoniae	Gammaproteobacteria
Gammaproteobacteria	Vibrio sp. B1ASS3	CAJIMV010000001.1	ACOMICROBIO_LOCUS1702	gb|CAD7812805.1|	MALEQVIYDLEQVKGLSDEELYQRLYDSWGLENHKIDVWGELSINEAGNWAGIRNAKTLNGNQSIEYPLADSYELQSGVFLNPSVAKIVLGNDTKGMVACELMLASIPQRAKKNNPFLLAVNDKTVERLTYLPDALPNLDRQALIQNEDETLLRKVIYDAEVKRVKHRIASETEALEAALQEKQQDMTEKLAELSDAFKSTQDKITASTTELESSIKRNEELNDDNHRLNLKIQESKAELDVIIEKSRRVEESMARKVEKLTDFIKEKAIFLKSFEFLDEDDFDFFVGSSLSNKDRGEHISFSQAFDSNYSDAVSYIQAHLKERDILYPRHIIENFLTLIRTNDLIILAGDSGSGKTNLVQSFAKAIGGVSKIIPVKPNWTSSEDLLGYYNPLEKKYLA…	ACOMICROBIO_NCLOACGD_02584	gb|CAD7812798.1|	MEAPFVIKFIETKWHDKQTLVSVSESEYSLKLEQTGNNAFSAHTTIYPKVDELRFAQLAIKTKHGDQSPPYIVMPNGDRKQLESITDPASNAVWWVEPAHWDAKQRVWRSEARRTAGQITFVIGNSTLKLDIDISEQTKSDLSRYLSDFKADLWELILDENSHITGDAKNSQVAAIDQEALSLVASILSNAQTILKKPKVELKEVQALKPAKEVRPVPRTFMEICTKGSRKHLTSRASEPSYNVPENQYVLYVVSSTLSIVKQLVKVAESKKSRFSGAIEKLNERLDSLKDYRIINRDLVVKDLERLKKRFDTEVINAELASQLGEINANKYFSLNHAAKGYLRLEKATGSENEWWAKIKPSLHDDWQQFELNGHTIFSSGEHYASLFKPYSDYDMVAI…	Vibrio sp. B1ASS3	Gammaproteobacteria
Gammaproteobacteria	Pseudoalteromonas luteoviolacea B = ATCC 29581	CAPN01000032.1	PALB_17170	gb|CCQ10843.1|	MNEVIYSKEELEDRSEAELFAILKQSWGVNDNKIEVWGELPALGDTTFGFLRNPRLVSTGDRLYYPVQGLEIEPCRFFMAPQDASSCGSKKHKRFVRCELELSPESERRKHNNPLSLCVKSGTGEKLLYLPKEIPLEILTNPNSEEEISQFISKSIYDFYHEKAMGDLDELVKKEQSEFELKMAQKERDATQSLEIIKDKIQENEEKRDIAIKLVEKLNSKQIELDKTISKLAQDKATKKTEIQTLVTSYTRIEAEMNNKIKRLKEYVADKALFLKTFEFIDEEVLELFIQESQPSSDQVEGVSFSDILNGDYQQAVSYIQSYLVSQDILYPRHIIENYITLLRTKDLVILAGDSGSGKTNLVKSFAKAVGGKSIIIPVKPNWTSSEDLLGYYNPLEKK…	PALB_17160	gb|CCQ10842.1|	MNQCFTTETTIYPKLDEIKRGQLAVRVLNVEAGQPYIYLPNNDKKLLTQIKDPDTGIYWWILKEKWVSEQKQWFGIAPNIVGTLKFYITSQLCEVEINGSDFSVEQLEQYLRVFKNDLWELILDDSSAVQANAKQTNGIGVSEEVIECINKIVNAAQKILETPKVELREIQTIKPRKLVKPVNRTFMEMVSKSNQRFLTSRATQPSYNVPENRYILFALERCCRVLKQIVILAQNKSQRFLDTANKLKGQLDSFDTSVKVNRDLVVKDLERVRERAKLEYWQKKLNLKIQDNDIQLTTTRCSLDLYLHLENKTQQKDGFFVLIWNGESWVKPDNKSGILSLRYRYQVLLEVLEPGDTLKFNCDYNYRTSERAVLFNLDNVHSIELIDCQSIQKAKEAFE…	Pseudoalteromonas luteoviolacea B = ATCC 29581	Gammaproteobacteria
Gammaproteobacteria	Salmonella enterica subsp. enterica serovar Agona str. 20.H.06	CASV01000005.1	SA20_0354	gb|CCT07145.1|	MALEQVIYNLEEVKGFSDEELYQRLCESWGITNGKLAVWGKILNGPDSDSRKLPTRLLEIKSLQTGLDTEYPINVRLTMDKGVFVSFKSVEELFGLEDGSFVSCELALAPQSEREKHENPFECNVVVSSVRRLIKLPEYTANDIIKGDENIFLDEAVYKQHLQNVQSRIDSEVTALNAEFEREESSLKAQISSYKDQLQHVQDDLNQKNNVLSQAIAKAQKLEVEHSEWQHKIALQKKAEETMSKKIERLKAYVESKAGFLKSFEFLDDDDFDLFVGSTLSNKDRDEHISFSQAFDSNYSDAVSYIQAHLKERDILYPRHIIENFLTLIRTHDLIILAGDSGSGKTNLVQSFAKAIGGVSKIIPVKPNWTSSEDLLGYYNPLEKKYLVTPFLEALIEAK…	SA20_0355	gb|CCT07146.1|	MEAPFVIKFIETKWHDKQTLVSVSESEYSLKLEQTGNNAFSAHTTIYPKVDELRFAQLAIKTKQGDQSPPYIVMPNGDRKQLESITDPASNAVWWVEPAHWDAKQRVWRSEARRTAGQITFVIGNSTLKLDIDISEQTKSDLSRYLSDFKADLWELILDENSHITGDAKNSQVAAIGQEALSLVASILSNAQTILKKPKVELKEIQALKPAKEVRPVPRTFMEICTKGSRKHLTSRASEPSYNVPENQYVLYVVSSTLSIVKQLVKVAESKKSRFSGAIEKLNERLDSLKDYRIINRDLVVKDLERLKKRFDTEVINAELSEQLAKINVNLSRSYSEKGYLRLEKATGSENEWWAKIKLSQNDDWQQFEPDGYTIFSSRNHYASLFKAYSEYEIEAKIP…	Salmonella enterica subsp. enterica serovar Agona str. 20.H.06	Gammaproteobacteria
Gammaproteobacteria	Klebsiella quasipneumoniae subsp. quasipneumoniae	CBZM010000369.1	KPSB59_4300011	gb|CDN03876.1|	MALEQVIYNLEEVKGFSDEELYQRLCESWGITNGKLAVWGKILNGPDSDSRKLPTRLLEIKSLQTGLDTEYPINVRLTMDKGVFVSFKSVEELFGLEDGSFVSCELALAPQSEREKHENPFECNVVVSSVRRLIKLPEYTANDIIKGDENIFLDEAVYKQHLQNVQSRIDSEVTALNAEFEREESSLKAQISSYKDQLQHVQDDLNQKNNVLSQAIAKAQKLEVEHSEWQHKIALQKKAEETMSKKIERLKAYVESKAGFLKSFEFLDDDDFDLFVGSTLSNKDRDEHISFSQAFDSNYSDAVSYIQAHLKERDILYPRHIIENFLTLIRTHDLIILAGDSGSGKTNLVQSFAKAIGGVSKIIPVKPNWTSSEDLLGYYNPLEKKYLVTPFLEALIEAK…	KPSB59_4300010	gb|CDN03875.1|	MEAPFVIKFIETKWHDKQTLVSVSESEYSLKLEQTGNNAFSAHTTIYPKVDELRFAQLAIKTKQGDQSPPYIVMPNGDRKQLESITDPASNAVWWVEPAHWDAKQRVWRSEARRTAGQITLVIGNSTLKLDIDISEQTKSDLSRYLSDFKADLWELILDENSHITGDAKNSQVAAIGQEALSLVASILSNAQTILKKPKVELKEIQALKPAKEVRPVPRTFMEICTKGSRKHLTSRASEPSYNVPENQYVLYVVSSTLSIVKQLVKVAESKKSRFSGAIEKLNERLDSLKDYRIINRDLVVKDLERLKKRFDTEVINAELSEQLAKINVNLSRSYSEKGYLRLEKATGSENEWWAKIKLSQNDDWQQFEPDGYTIFNSRDHYASLFKAYSDYEIEAKIP…	Klebsiella quasipneumoniae subsp. quasipneumoniae	Gammaproteobacteria
Bacillota	Romboutsia ilealis	LN555523.1	CRIB_1445	gb|CED94053.1|	MTEEHVFGIESIKFDYENNLITSNQVKELIGILRSEGILGDEVICEINGKKYNEEKQSWIHFMDVLDPSNKLTYIKNPLNEEKLTVVFHSQDSGFNRGDIVVGEYYPETSLQYLDKLIKVKSETVRKLPKSQEIKDLYGNKFAKYLEEKFESDKELIPIIYEKFEEIYTEKAEDTLQYIEELKDKQNEIILETKEKESKCKSLDKSIDIRERKIKVLDEDIHQLKEKINKLKKYFIYELELDHSLDNDSKELIKVDNIEEIILTIQKLLYHYEDEGLVYSYDVISSFFKALKVDQLVLLSGPSGTGKSSLVNQLGKIINKFKVHHIAVQSSWSDVQDILGFFNPIQKRYVSTPFLDALVEAKLDPNGVHIICLDEMNLAHIEYYFSSFLSIREKNINER…	CRIB_1444	gb|CED94052.1|	MEVVWLDISWKNLSSRVDNKEHIEGEVKDVEVIKNLEYRDNHYIGKEYTKINGKYVNIGIITNKDLVRVSAIGKFGYNRSLIEAQKGIWVSTPQYIWSEELKKYQPISYPIGINQCGVIKFKGEDSKGNKYETPEIKIIPDLVTEEEYDIMETQLKIITENLLDNYQKDYNGSTSGNVLINLDSLSIYIDNLCDILEEINDNPQELLIEVRERVKVDKIKKFNAKLYIEQEMYPYKEMFNTDVSKKTLDLKEHRILKGALQELIDICENQIKYEESINESLRFQINEIKKLKTRDANIAKKANNRIKNIKEKGININNRINTWKQLIQKLNNIIEIEIFKDIVTQSWEDTHIFNFNPLYQEVFDVFETLNKLVRKNEILSIFKHDLIKSPDLYEKWILF…	Romboutsia ilealis	Bacillota
Bacillota	Streptococcus pneumoniae	CIIO01000064.1	ERS232498_01473	gb|CKE81089.1|	MIVMKQKTQASTMSKQQDFTKSKVKEILEGMKREGTLGNEVVIRIEEVHKNTVSDGWRYLCYVLDPNDHFNEMKHPLNNYSWNIVFVWKEGAFKEGDVLIGQYKFEQNRKHMGQLIQIVPATLKHMPRLSTLIDRHGDNFGNHLQDAFGGEEKIIGLIYERWLETVEIDMKEWEEKKESVLAELGILNSKFKEKEEEFSDLKNQTTDLKHKKKQLENQIHQLKVVFGFEEGTDFEQTWNDETETYVFTEEEDFYKVLQRALYYYNDENLIYEYDVVKRFFTALQTDQLVLLTGPSGTGKSSLVNQVGQVMQNFKVHHVAVQSSWTDVQDLLGFFNPMKKCYLPTPFLEAIVEARNQEDVIHIICLDEMNLAHVEYYFSSFLSVREKQPNERYVDLYSER…	ERS232498_01471	gb|CKE81061.1|	MGKIFKAYVGRSLKKALADTDWNVSLQDRGYYLFERKSALKPDIVVERNDITRKIILDTKWKALYNNPRSNYDQLKESIVLMIKENTDLQKRERLKKEINRELNSIHSKVNDNE	Streptococcus pneumoniae	Bacillota
Bacillota	Streptococcus pneumoniae	CIDG01000025.1	ERS232505_01589	gb|CKE88410.1|	MIVMKQKTQASTMSKQQDFTKSKVKEILEGMKREGTLGNEVVIRIEEVHKNTVSDGWRYLCYVLDPNDHFNEMKHPLNNYSWNIVFVWKEGAFKEGDVLIGQYKFEQNRKHMGQLIQIVPATLKHMPRLSTLIDRHGDNFGNHLQDAFGGEEKIIGLIYERWLETVEIDMKEWEEKKESVLAELGILNSKFKEKEEEFSDLKNQTTDLKHKKKQLENQIHQLKVVFGFEEGTDFEQTWNDETETYVFTEEEDFYKVLQRALYYYNDENLIYEYDVVKRFFTALQTDQLVLLTGPSGTGKSSLVNQVGQVMQNFKVHHVAVQSSWTDVQDLLGFFNPMKKCYLPTPFLEAIVEARNQEDVIHIICLDEMNLAHVEYYFSSFLSVREKQPNERYVDLYSER…	ERS232505_01590	gb|CKE88419.1|	MKPIWIKVSWNQPPLFFQDELFISKPVEVQVVEELEIQDGAFIATEYTRTTDGFLTIGIKTDKSLKRAYARGKFLYERELVYVSNGIWISCPQYMWSERFKEYQIISSPIGLNQCGTIQFAGETITDERIITNDVKIRPSLVTEAEYIQMEQDLMTITEELLFHAQAGLGDTGKIKSLIDLETLDNQVEKLDEVIRQLEEAPAEKLSSERVRMNVDKLKKFDVRVLLEQEMYPFKQTVNALTTIRSQDIQEHRKIKGAILDFIETCERQSRSEQMMKVNLERQLHDVEEFSQKVVGTREAHFQEKFNSKKEWFRLQSGYFTERDKVWTKIILHLENLSHSYLLQDCEEEEWGDTHIFSFHPVYEESFETIEQLREQLRLQEPLKAFQHDLIQSPDLYEK…	Streptococcus pneumoniae	Bacillota
Bacillota	Bacillus paranthracis	CMPU01000065.1	ERS232495_02762	gb|CKF20302.1|	MIVMKQKTQASTMSKQQDFTKSKVKEILEGMKREGTLGNEVVIRIEEVHKNTVSDGWRYLCYVLDPNDHFNEMKHPLNNYSWNIVFVWKEGAFKEGDVLIGQYKFEQNRKHMGQLIQIVPATLKHMPRLSTLIDRHGDNFGNHLQDAFGGEEKIIGLIYERWLETVEIDMKEWEEKKESVLAELGILNSKFKEKEEEFSDLKNQTTDLKHKKKQLENQIHQLKVVFGFEEGTDFEQTWNDETETYVFTEEEDFYKVLQRALYYYNDENLIYEYDVVKRFFTALQTDQLVLLTGPSGTGKSSLVNQVGQVMQNFKVHHVAVQSSWTDVQDLLGFFNPMKKCYLPTPFLEAIVEARNQEDVIHIICLDEMNLAHVEYYFSSFLSVREKQPNERYVDLYSER…	ERS232495_02763	gb|CKF20332.1|	MKPIWIKVSWNQPPLFFQDELFISKPVEVQVVEELEIQDGAFIATEYTRTTDGFLTIGIKTDKSLKRAYARGKFLYERELVYVSNGIWISCPQYMWSERFKEYQIISSPIGLNQCGTIQFAGETITDERIITNDVKIRPSLVTEAEYIQMEQDLMTITEELLFHAQAGLGDTGKIKSLIDLETLDNQVEKLDEVIRQLEEAPAEKLSSERVRMNVDKLKKFDVRVLLEQEMYPFKQTVNALTTIRSQDIQEHRKIKGAILDFIETCERQSRSEQMMKVNLERQLHDVEEFSQKVVGTREAHFQEKFNSKKEWFRLQSGYFTERDKVWTKIILHLENLSHSYLLQDCEEEEWGDTHIFSFHPVYEESFETIEQLREQLRLQEPLKAFQHDLIQSPDLYEK…	Bacillus paranthracis	Bacillota
Gammaproteobacteria	Salmonella enterica	AADWLQ010000074.1	EPL13_24440	gb|EAV0081684.1|	MALEQVIYNLEEVKGLSDEELYQRLYDSWGLENHKIDVWGELSINEAGNWAGIRNAKTLSGNQSIEYPLADSHELQSGVFLTPSVAKIVLGNDTKGMVACELMLASIPQRAKKNNPFLLAVNDKTVERLTYLPDALPNLDRQALIQNEDETLLRKVIYDAEVKRVKHKIASETEALEAALQEKQQDMTDKLAELSDAFKSTQDKITASTTELESSIKRNEELNNDNHRLNLKIQESKAELDVIIEKSRKVEESMARKVEKLTDFIKEKAIFLKSFEFLDEEDFDFFVGSPLSNKERGEHISFSQALYSNYSDAVSYIQAYLKERDILYPRHIIENFLTLIRTNDLIILAGDSGSGKTNLVQSFAKAIGGVSKIIPVKPNWTSSEDLLGYYNPLEKKYLA…	EPL13_24445	gb|EAV0081685.1|	METPFVIKFIETKWHDKQTLVSVSESEYSLKLEQTGNNAFSAHTTIYPKVDELRFAQLAIKTKQGDQSPPYIVMPNGDRKQLESITDPASNAVWWVEPAHWDAKQRVWRSEARRTAGQITFVIGNSTLKLDIDISEQTKSDLSRYLSDFKADLWELILDENSHITGDAKNSQVAAIDQEALSLVASILSNAQTILKKPKVELKEIQALKPAKEVRPVPRTFMEICTKGSRKHLTSRASEPSYNVPENQYVLYVVSSTLSIVKQLVKVAESKKSRFSGAIEKLNERLDSLKDYRIINRDLVVKDLERLKKRFDTEVINAELASQLGEINANKYFSTNHAAKGYLRLEKTTGSENEWWAKIKPSQHDDWQQFELDGYTIFSSGEYYASLFQPYSDYDMVAI…	Salmonella enterica	Gammaproteobacteria
Gammaproteobacteria	Salmonella enterica subsp. enterica serovar Choleraesuis	AAEBEV010000061.1	FFG29_24020	gb|EAW3905799.1|	MALEQVIYNLEEVKGLSDEELYQRLYDSWGLENHKIDVWGELSINVAGNWAGIRNAKTLSGNQSIEYPLADSHELQSGVFLTPSVAKIVLGNDTKGMVACELMLASIPQRAKKNNPFLLAVNDKTVERLTYLPDALPNLDRQALIQNEDETLLRKVIYDAEVKRVKHKIASETEALEAALQEKQQDMTDKLAELSDAFKSTQDKITASTTELESSIKRNEELNNDNHRLNLKIQESKAELDVIIEKSRKVEESMARKVEKLTDFIKEKAIFLKSFEFLDEEDFDFFVGSPLSNKERGEHISFSQALYSNYSDAVSYIQAYLKERDILYPRHIIENFLTLIRTNDLIILAGDSGSGKTNLVQSFAKAIGGVSKIIPVKPNWTSSEDLLGYYNPLEKKYLA…	FFG29_24025	gb|EAW3905800.1|	METPFVIKFIETKWHDKQTLVSVSESEYSLKLEQTGNNAFSAHTTIYPKVDELRFAQLAIKTKQGDQSPPYIVMPNGDRKQLESITDPASNAVWWVEPAHWDAKQRVWRSEARRTAGQITFVIGNSTLKLDIDISEQTKSDLSRYLSDFKADLWELILDENSHITGDAKNSQVAAIDQEALSLVASILSNAQTILKKPKVELKEIQALKPAKEVRPVPRTFMEICTKGSRKHLTSRASEPSYNVPENQYVLYVVLSTLSIVKQLVKVAESKKSRFSGAIEKLNERLDSLKDYRIINRDLVVKDLERLKKRFDTEVINAELASQLGEINANKYFSQNHAAKGYLRLEKTTGSENEWWAKIKPSQHDDWQQFELDGYTIFSSGEYYASLFQPYSDYDMVAI…	Salmonella enterica subsp. enterica serovar Choleraesuis	Gammaproteobacteria
Gammaproteobacteria	Salmonella enterica	AAEBYO010000040.1	FFT99_22620	gb|EAW6210922.1|	MALEQVIYNLEEVKGLSDEELYQRLYDSWGLENHKIDVWGELSINVAGNWAGIRNAKTLSGNQSIEYPLADSHELQSGVFLTPSVAKIVLGNDTKGMVACELMLASIPQRAKKNNPFLLAVNDKTVERLTYLPDALPNLDRQALIQNENETLLRKVIYDAEVKRVKHKIASETEALEAALQEKQQDMTDKLAELSDAFKSTQDKITASTTELESSIKRNEELNNDNHRLNLKIQESKAELDVIIEKSRKVEESMARKVEKLTDFIKEKAIFLKSFEFLDEEDFDFFVGSPLSNKERGEHISFSQALYSNYSDAVSYIQAYLKERDILYPRHIIENFLTLIRTNDLIILAGDSGSGKTNLVQSFAKAIGGVSKIIPVKPNWTSSEDLLGYYNPLEKKYLA…	FFT99_22625	gb|EAW6210923.1|	METPFVIKFIETKWHDKQTLVSVSESEYSLKLEQTGNNAFSAHTTIYPKVDELRFAQLAIKTKQGDQSPPYIVMPNGDRKQLESITDPASNAVWWVEPAHWDAKQRVWRSEARRTAGQITFVIGNSTLKLDIDISEQTKSDLSRYLSDFKADLWELILDENSHITGDAKNSQVAAIDQEALSLVASILSNAQTILKKPKVELKEIQALKPAKEVRPVPRTFMEICTKGSRKHLTSRASEPSYNVPENQYVLYVVLSTLSIVKQLVKVAESKKSRFSGAIEKLNERLDSLKDYRIINRDLVVKDLERLKKRFDTEVINAELASQLGEINANKYFSQNHAAKGYLRLEKTTGSENEWWAKIKPSQHDDWQQFELDGYTIFSSGEYYASLFQPYSDYDMVAI…	Salmonella enterica	Gammaproteobacteria
Gammaproteobacteria	Salmonella enterica	AAFDWO010000031.1	DCT66_22725	gb|EBF0498293.1|	MALEQVIYNLEEVKGLSDEELYQRLYDSWGLENHKIDVWGELSINVAGNWAGIRNAKTLSGNQSIEYPLADSHELQSGVFLTPSVAKIVLGNDTKGMVACELMLASIPQRAKKNNPFLLAVNDKTVERLTYLPDALPNLDRQALIQNENETLLRKVIYDAEVKRVKHKIASETEALEAALQEKQQDMTDKLAELSDAFKSTQDKITASTTELESSIKRNEELNNDNHRLNLKIQESKAELDVIIEKSRKVEESMARKVEKLTDFIKEKAIFLKSFEFLDEEDFDFFVGSPLSNKERGEHISFSQALYSNYSDAVSYIQAYLKERDILYPRHIIENFLTLIRTNDLIILAGDSGSGKTNLVQSFAKAIGGVSKIIPVKPNWTSSEDLLGYYNPLEKKYLA…	DCT66_22730	gb|EBF0498294.1|	METPFVIKFIETKWHDKQTLVSVSESEYSLKLEQTGNNAFSAHTTIYPKVDELRFAQLAIKTKQGDQSPPYIVMPNGDRKQLESITDPASNAVWWVEPAHWDAKQRVWRSEARRTAGQITFVIGNSTLKLDIDISEQTKSDLSRYLSDFKADLWELILDENSHITGDAKNSQVAAIDQEALSLVASILSNAQTILKKPKVELKEIQALKPAKEVRPVPRTFMEICTKGSRKHLTSRASEPSYNVPENQYVLYVVLSTLSIVKQLVKVAESKKSRFSGAIEKLNERLDSLKDYRIINRDLVVKDLERLKKRFDTEVINAELASQLGEINANKYFSQNHAAKGYLRLEKTTGSENEWWAKIKPSQHDDWQQFELDGYTIFSSGEYYASLFQPYSDYDMVAI…	Salmonella enterica	Gammaproteobacteria
Gammaproteobacteria	Salmonella enterica	AAFDWO010000065.1	DCT66_23525	gb|EBF0498425.1|	MALEQVIYNLEEVKGLSDEELYQRLYDSWGLENHKIDVWGELSINVAGNWAGIRNAKTLSGNQSIEYPLADSHELQSGVFLTPSVAKIVLGNDTKGMVACELMLASIPQRAKKNNPFLLAVNDKTVERLTYLPDALPNLDRQALIQNENETLLRKVIYDAEVKRVKHKIASETEALEAALQEKQQDMTDKLAELSDAFKSTQDKITASTTELESSIKRNEELNNDNHRLNLKIQESKAELDVIIEKSRKVEESMARKVEKLTDFIKEKAIFLKSFEFLDEEDFDFFVGSPLSNKERGEHISFSQALYSNYSDAVSYIQAYLKERDILYPRHIIENFLTLIRTNDLIILAGDSGSGKTNLVQSFAKAIGGVSKIIPVKPNWTSSEDLLGYYNPLEKKYLA…	DCT66_23520	gb|EBF0498424.1|	METPFVIKFIETKWHDKQTLVSVSESEYSLKLEQTGNNAFSAHTTIYPKVDELRFAQLAIKTKQGDQSPPYIVMPNGDRKQLESITDPASNAVWWVEPAHWDAKQRVWRSEARRTAGQITFVIGNSTLKLDIDISEQTKSDLSRYLSDFKADLWELILDENSHITGDAKNSQVAAIDQEALSLVASILSNAQTILKKPKVELKEIQALKPAKEVRPVPRTFMEICTKGSRKHLTSRASEPSYNVPENQYVLYVVLSTLSIVKQLVKVAESKKSRFSGAIEKLNERLDSLKDYRIINRDLVVKDLERLKKRFDTEVINAELASQLGEINANKYFSQNHAAKGYLRLEKTTGSENEWWAKIKPSQHDDWQQFELDGYTIFSSGEYYASLFQPYSDYDMVAI…	Salmonella enterica	Gammaproteobacteria
Gammaproteobacteria	Salmonella enterica subsp. enterica serovar Mbandaka	AAFNPU010000028.1	D6285_24230	gb|EBH8811335.1|	ASIPQRAKKNNPFLLAVNDKTVERLTYLPDALPNLDRQALIQNEDETLLRKVIYDAEVKRVKHKIASETEALEAALQEKQQDMTDKLAELSDAFKSTQDKITASTTELESSIKRNEELNNDNHRLNLKIQESKAELDVIIEKSRKVEESMARKVEKLTDFIKEKAIFLKSFEFLDEEDFDFFVGSPLSNKERGEHISFSQALYSNYSDAVSYIQAYLKERDILYPRHIIENFLTLIRTNDLIILAGDSGSGKTNLVQSFAKAIGGVSKIIPVKPNWTSSEDLLGYYNPLEKKYLATPFLEALIEAKQNPDIPYFICLDEMNLARVEYYFADFLSKLEERNEQPTIQLYSDDEAAHVLAELKGVVSVISNAQEKFSKNGIVDFVALMQDEEINAEMKRAF…	D6285_24235	gb|EBH8811336.1|	METPFVIKFIETKWHDKQTLVSVSESEYSLKLEQTGNNAFSAHTTIYPKVDELRFAQLAIKTKQGDQSPPYIVMPNGDRKQLESITDPASNAVWWVEPAHWDAKQRVWRSEARRTAGQITFVIGNSTLKLDIDISEQTKSDLSRYLSDFKADLWELILDENSHITGDAKNSQVAAIDQEALSLVASILSNAQTILKKPKVELKEIQALKPAKEVRPVPRTFMEICTKGSRKHLTSRASEPSYNVPENQYVLYVVLSTLSIVKQLVKVAESKKSRFSGAIEKLNERLDSLKDYRIINRDLVVKDLERLKKRFDTEVINAELASQLGEINANKYFSQNHAAKGYLRLEKTTGSENEWWAKIKPSQHDDWQQFELDGYTIFSSGEYYASLFQPYSDYDMVAI…	Salmonella enterica subsp. enterica serovar Mbandaka	Gammaproteobacteria
Gammaproteobacteria	Salmonella enterica subsp. enterica serovar Mbandaka	AAHGGH010000072.1	AC268_23925	gb|EBV7580822.1|	MALEQVIYNLEEVKGLSDEELYQRLYDSWGLENHKIDVWGELSINVAGNWAGIRNAKTLSGNQSIEYPLADSHELQSGVFLTPSVAKIVLGNDTKGMVACELMLASIPQRAKKNNPFLLAVNDKTVERLTYLPDALPNLDRQALIQNEDETLLRKVIYDAEVKRVKHKIASETEALEAALQEKQQDMTDKLAELSDAFKSTQDKITASTTELESSIKRNEELNNDNHRLNLKIQESKAELDVIIEKSRKVEESMARKVEKLTDFIKEKAIFLKSFEFLDEEDFDFFVGSPLSNKERGEHISFSQALYSNYSDAVSYIQAYLKERDILYPRHIIENFLTLIRTNDLIILAGDSGSGKTNLVQSFAKAIGGVSKIIPVKPNWTSSEDLLGYYNPLEKKYLA…	AC268_23930	gb|EBV7580823.1|	METPFVIKFIETKWHDKQTLVSVSESEYSLKLEQTGNNAFSAHTTIYPKVDELRFAQLAIKTKQGDQSPPYIVMPNGDRKQLESITDPASNAVWWVEPAHWDAKQRVWRSEARRTAGQITFVIGNSTLKLDIDISEQTKSDLSRYLSDFKADLWELILDENSHITGDAKNSQVAAIDQEALSLVASILSNAQTILKKPKVELKEIQALKPAKEVRPVPRTFMEICTKGSRKHLTSRASEPSYNVPENQYVLYVVLSTLSIVKQLVKVAESKKSRFSGAIEKLNERLDSLKDYRIINRDLVVKDLERLKKRFDTEVINAELASQLGEINANKYFSQNHAAKGYLRLEKTTGSENEWWAKIKPSQHDDWQQFELDGYTIFSSGEYYASLFQPYSDYDMVAI…	Salmonella enterica subsp. enterica serovar Mbandaka	Gammaproteobacteria
Gammaproteobacteria	Salmonella enterica subsp. enterica serovar Infantis	AAHLYZ010000040.1	DS318_23305	gb|EBX6913728.1|	MALEQVIYNLEEVKGLSDEELYQRLYDSWGLENHKIDVWGELSINVAGNWAGIRNAKTLSGNQSIEYPLADSHELQSGVFLTPSVAKIVLGNDTKGMVACELMLASIPQRAKKNNPFLLAVNDKTVERLTYLPDALPNLDRQALIQNENETLLRKVIYDAEVKRVKHKIASETEALEAALQEKQQDMTDKLAELSDAFKSTQDKITASTTELESSIKRNEELNNDNHRLNLKIQESKAELDVIIEKSRKVEESMARKVEKLTDFIKEKAIFLKSFEFLDEEDFDFFVGSPLSNKERGEHISFSQALYSNYSDAVSYIQAYLKERDILYPRHIIENFLTLIRTNDLIILAGDSGSGKTNLVQSFAKAIGGVSKIIPVKPNWTSSEDLLGYYNPLEKKYLA…	DS318_23310	gb|EBX6913729.1|	METPFVIKFIETKWHDKQTLVSVSESEYSLKLEQTGNNAFSAHTTIYPKVDELRFAQLAIKTKQGDQSPPYIVMPNGDRKQLESITDPASNAVWWVEPAHWDAKQRVWRSEARRTAGQITFVIGNSTLKLDIDISEQTKSDLSRYLSDFKADLWELILDENSHITGDAKNSQVAAIDQEALSLVASILSNAQTILKKPKVELKEIQALKPAKEVRPVPRTFMEICTKGSRKHLTSRASEPSYNVPENQYVLYVVLSTLSIVKQLVKVAESKKSRFSGAIEKLNERLDSLKDYRIINRDLVVKDLERLKKRFDTEVINAELASQLGEINANKYFSQNHAAKGYLRLEKTTGSENEWWAKIKPSQHDDWQQFELDGYTIFSSGEYYASLFQPYSDYDMVAI…	Salmonella enterica subsp. enterica serovar Infantis	Gammaproteobacteria
Gammaproteobacteria	Salmonella enterica subsp. enterica serovar Muenster	AAHNFH010000035.1	DUW00_23635	gb|EBY1360364.1|	MALEQVIYNLEEVKGFSDEELYQCLCESWGITNGKLAVWGKILNGPDSDSRKLPTRLLEIKSLQTGLDTEYPINVRLTMDKGVFVSFKSVEELFGLEDGSFVSCELALAPQSEREKHENPFECNVVVSSVRRLIKLPEYTANDIIKGDENIFLDEAVYKQHLQNVQSRIDSEVTALNAEFEREESSLKAQISSYKDQLQHVQDDLNQKNNVLSQAIAKAQKLEVEHSEWQHKIALQKKAEETMSKKIERLKAYVESKAGFLKSFEFLDDDDFDLFVGSTLSNKDRDEHISFSQAFDSNYSDAVSYIQAHLKERDILYPRHIIENFLTLIRTHDLIILAGDSGSGKTNLVQSFAKAIGGVSKIIPVKPNWTSSEDLLGYYNPLEKKYLVTPFLEALIEAK…	DUW00_23640	gb|EBY1360365.1|	MEAPFVIKFIETKWHDKQTLVSVSESEYSLKLEQTGNNAFSAHTTIYPKVDELRFAQLAIKTKQGDQSPPYIVMPNGDRKQLESITDPASNAVWWVEPAHWDAKQRVWRSEARRTAGQITFVIGNSTLKLDIDISEQTKSDLSRYLSDFKADLWELILDENSHITGDAKNSQVAAIGQEALSLVASILSNAQTILKKPKVELKEIQALKPAKEVRPVPRTFMEICTKGSRKHLTSRASEPSYNVPENQYVLYVVSSTLSIVKQLVKVAESKKSRFSGAIEKLNERLDSLKDYRIINRDLVVKDLERLKKRFDTEVINAELSEQLAKINVNLSRSYSEKGYLRLEKATGSENEWWAKIKLSQNDDWQQFEPDGYTIFNSRDHYASLFKAYSDYEIEAKIP…	Salmonella enterica subsp. enterica serovar Muenster	Gammaproteobacteria
Gammaproteobacteria	Salmonella enterica subsp. enterica serovar Bredeney	AAHYID010000034.1	E0Y07_23870	gb|ECB6723065.1|	MALEQVIYNLEEVKGLSDEELYQRLYDSWGLENHKIDVWGELSINVAGNWAGIRNAKTLSGNQSIEYPLADSHELQSGVFLTPSVAKIVLGNDTKGMVACELMLASIPQRAKKNNPFLLAVNDKTVERLTYLPDALPNLDRQALIQNEDETLLRKVIYDAEVKRVKHKIASETEALEAALQEKQQDMTDKLAELSDAFKSTQDKITASTTELESSIKRNEELNNDNHRLNLKIQESKAELDVIIEKSRKVEESMARKVEKLTDFIKEKAIFLKSFEFLDEEDFDFFVGSPLSNKERGEHISFSQALYSNYSDAVSYIQAYLKERDILYPRHIIENFLTLIRTNDLIILAGDSGSGKTNLVQSFAKAIGGVSKIIPVKPNWTSSEDLLGYYNPLEKKYLA…	E0Y07_23875	gb|ECB6723066.1|	METPFVIKFIETKWHDKQTLVSVSESEYSLKLEQTGNNAFSAHTTIYPKVDELRFAQLAIKTKQGDQSPPYIVMPNGDRKQLESITDPASNAVWWVEPAHWDAKQRVWRSEARRTAGQITFVIGNSTLKLDIDISEQTKSDLSRYLSDFKADLWELILDENSHITGDAKNSQVAAIDQEALSLVASILSNAQTILKKPKVELKEIQALKPAKEVRPVPRTFMEICTKGSRKHLTSRASEPSYNVPENQYVLYVVLSTLSIVKQLVKVAESKKSRFSGAIEKLNERLDSLKDYRIINRDLVVKDLERLKKRFDTEVINAELASQLGEINANKYFSQNHAAKGYLRLEKTTGSENEWWAKIKPSQHDDWQQFELDGYTIFSSGEYYASLFQPYSDYDMVAI…	Salmonella enterica subsp. enterica serovar Bredeney	Gammaproteobacteria
Gammaproteobacteria	Salmonella enterica subsp. enterica	AAIDBF010000127.1	DQE75_25075	gb|ECC9183318.1|	MALEQVIYNLEEVKGFSDEELYQCLCESWGITNGKLAVWGKILNGPDSDSRKLPTRLLEIKSLQTGLDTEYPINVRLTMDKGVFVSFKSVEELFGLEDGSFVSCELALAPQSEREKHENPFECNVVVSSVRRLIKLPEYTANDIIKGDENIFLDEAVYKQHLQNVQSRIDSEVTALNAEFEREESSLKAQISSYKDQLQHVQDDLNQKNNVLSQAIAKAQKLEVEHSEWQHKIALQKKAEETMSKKIERLKAYVESKAGFLKSFEFLDDDDFDLFVGSTLSNKDRDEHISFSQAFDSNYSDAVSYIQAHLKERDILYPRHIIENFLTLIRTHDLIILAGDSGSGKTNLVQSFAKAIGGVSKIIPVKPNWTSSEDLLGYYNPLEKKYLVTPFLEALIEAK…	DQE75_25080	gb|ECC9183319.1|	MEAPFVIKFIETKWHDKQTLVSVSESEYSLKLEQTGNNAFSAHTTIYPKVDELRFAQLAIKTKQGDQSPPYIVMPNGDRKQLESITDPASNAVWWVEPAHWDAKQRVWRSEARRTAGQITFVIGNSTLKLDIDISEQTKSDLSRYLSDFKADLWELILDENSHITGDAKNSQVAAIGQEALSLVASILSNAQTILKKPKVELKEIQALKPAKEVRPVPRTFMEICTKGSRKHLTSRASEPSYNVPENQYVLYVVSSTLSIVKQLVKVAESKKSRFSGAIEKLNERLDSLKDYRIINRDLVVKDLERLKKRFDTEVINAELSEQLAKINVNLSRSYSEKGYLRLEKATGSENEWWAKIKLSQNDDWQQFEPDGYTIFNSRDHYASLFKAYSDYEIEAKIP…	Salmonella enterica subsp. enterica	Gammaproteobacteria
Gammaproteobacteria	Salmonella enterica subsp. enterica serovar Havana	AAIEGN010000041.1	EXQ04_22700	gb|ECD2980421.1|	MALEQVIYNLEEVKGLSDEELYQRLYDSWGLENHKIDVWGELSINVAGNWAGIRNAKTLSGNQSIEYPLADSHELQSGVFLTPSVAKIVLGNDTKGMVACELMLASIPQRAKKNNPFLLAVNDKTVERLTYLPDALPNLDRQALIQNEDETLLRKVIYDAEVKRVKHKIASETEALEAALQEKQQDMTDKLAELSDAFKSTQDKITASTTELESSIKRNEELNNDNHRLNLKIQESKAELDVIIEKSRKVEESMARKVEKLTDFIKEKAIFLKSFEFLDEEDFDFFVGSPLSNKERGEHISFSQALYSNYSDAVSYIQAYLKERDILYPRHIIENFLTLIRTNDLIILAGDSGSGKTNLVQSFAKAIGGVSKIIPVKPNWTSSEDLLGYYNPLEKKYLA…	EXQ04_22705	gb|ECD2980422.1|	METPFVIKFIETKWHDKQTLVSVSESEYSLKLEQTGNNAFSAHTTIYPKVDELRFAQLAIKTKQGDQSPPYIVMPNGDRKQLESITDPASNAVWWVEPAHWDAKQRVWRSEARRTAGQITFVIGNSTLKLDIDISEQTKSDLSRYLSDFKADLWELILDENSHITGDAKNSQVAAIDQEALSLVASILSNAQTILKKPKVELKEIQALKPAKEVRPVPRTFMEICTKGSRKHLTSRASEPSYNVPENQYVLYVVLSTLSIVKQLVKVAESKKSRFSGAIEKLNERLDSLKDYRIINRDLVVKDLERLKKRFDTEVINAELASQLGEINANKYFSQNHAAKGYLRLEKTTGSENEWWAKIKPSQHDDWQQFELDGYTIFSSGEYYASLFQPYSDYDMVAI…	Salmonella enterica subsp. enterica serovar Havana	Gammaproteobacteria
Gammaproteobacteria	Salmonella enterica subsp. enterica serovar Agona	AAIOCJ010000072.1	EW937_24035	gb|ECG3580604.1|	KTLSGNQSIEYPLADSHELQSGVFLTPSVAKIVLGNDTKGMVACELMLASIPQRAKKNNPFLLAVNDKTVERLTYLPDALPNLDRQALIQNEDETLLRKVIYDAEVKRVKHKIASETEALEAALQEKQQDMTDKLAELSDAFKSTQDKITASTTELESSIKRNEELNNDNHRLNLKIQESKAELDVIIEKSRKVEESMARKVEKLTDFIKEKAIFLKSFEFLDEEDFDFFVGSPLSNKERGEHISFSQALYSNYSDAVSYIQAYLKERDILYPRHIIENFLTLIRTNDLIILAGDSGSGKTNLVQSFAKAIGGVSKIIPVKPNWTSSEDLLGYYNPLEKKYLATPFLEALIEAKQNPDIPYFICLDEMNLARVEYYFADFLSKLEERNEQPTIQLYSDD…	EW937_24030	gb|ECG3580603.1|	METPFVIKFIETKWHDKQTLVSVSESEYSLKLEQTGNNAFSAHTTIYPKVDELRFAQLAIKTKQGDQSPPYIVMPNGDRKQLESITDPASNAVWWVEPAHWDAKQRVWRSEARRTAGQITFVIGNSTLKLDIDISEQTKSDLSRYLSDFKADLWELILDENSHITGDAKNSQVAAIDQEALSLVASILSNAQTILKKPKVELKEIQALKPAKEVRPVPRTFMEICTKGSRKHLTSRASEPSYNVPENQYVLYVVLSTLSIVKQLVKVAESKKSRFSGAIEKLNERLDSLKDYRIINRDLVVKDLERLKKRFDTEVINAELASQLGEINANKYFSQNHAAKGYLRLEKTTGSENEWWAKIKPSQHDDWQQFELDGYTIFSSGEYYASLFQPYSDYDMVAI…	Salmonella enterica subsp. enterica serovar Agona	Gammaproteobacteria
Gammaproteobacteria	Salmonella enterica subsp. enterica	AAIZDC010000033.1	AXT51_22855	gb|ECJ6760900.1|	MALEQVIYNLEEVKGFSDEELYQCLCESWGITNGKLAVWGKILNGPDSDSRKLPTRLLEIKSLQTGLDTEYPINVRLTMDKGVFVSFKSVEELFGLEDGSFVSCELALAPQSEREKHENPFECNVVVSSVRRLIKLPEYTANDIIKGDENIFLDEAVYKQHLQNVQSRIDSEVTALNAEFEREESSLKAQISSYKDQLQHVQDDLNQKNNVLSQAIAKAQKLEVEHSEWQHKIALQKKAEETMSKKIERLKAYVESKAGFLKSFEFLDDDDFDLFVGSTLSNKDRDEHISFSQAFDSNYSDAVSYIQAHLKERDILYPRHIIENFLTLIRTHDLIILAGDSGSGKTNLVQSFAKAIGGVSKIIPVKPNWTSSEDLLGYYNPLEKKYLVTPFLEALIEAK…	AXT51_22860	gb|ECJ6760901.1|	MEAPFVIKFIETKWHDKQTLVSVSESEYSLKLEQTGNNAFSAHTTIYPKVDELRFAQLAIKTKQGDQSPPYIVMPNGDRKQLESITDPASNAVWWVEPAHWDAKQRVWRSEARRTAGQITFVIGNSTLKLDIDISEQTKSDLSRYLSDFKADLWELILDENSHITGDAKNSQVAAIGQEALSLVASILSNAQTILKKPKVELKEIQALKPAKEVRPVPRTFMEICTKGSRKHLTSRASEPSYNVPENQYVLYVVSSTLSIVKQLVKVAESKKSRFSGAIEKLNERLDSLKDYRIINRDLVVKDLERLKKRFDTEVINAELSEQLAKINVNLSRSYSEKGYLRLEKATGSENEWWAKIKLSQNDDWQQFEPDGYTIFNSRDHYASLFKAYSDYEIEAKIP…	Salmonella enterica subsp. enterica	Gammaproteobacteria
Gammaproteobacteria	Salmonella enterica subsp. enterica serovar Senftenberg	AALNKY010000148.1	AXT85_23555	gb|EDB4200807.1|	MALEQVIYNLEEVKGFSDEELYQCLCESWGITNGKLAVWGKILNGPDSDSRKLPTRLLEIKSLQTGLDTEYPINVRLTMDKGVFVSFKSVEELFGLEDGSFVSCELALAPQSEREKHENPFECNVVVSSVRRLIKLPEYTANDIIKGDENIFLDEAVYKQHLQNVQSRIDSEVTALNAEFEREESSLKAQISSYKDQLQHVQDDLNQKNNVLSQAIAKAQKLEVEHSEWQHKIALQKKAEETMSKKIERLKAYVESKAGFLKSFEFLDDDDFDLFVGSTLSNKDRDEHISFSQAFDSNYSDAVSYIQAHLKERDILYPRHIIENFLTLIRTHDLIILAGDSGSGKTNLVQSFAKAIGGVSKIIPVKPNWTSSEDLLGYYNPLEKKYLVTPFLEALIEAK…	AXT85_23560	gb|EDB4200808.1|	MEAPFVIKFIETKWHDKQTLVSVSESEYSLKLEQTGNNAFSAHTTIYPKVDELRFAQLAIKTKQGDQSPPYIVMPNGDRKQLESITDPASNAVWWVEPAHWDAKQRVWRSEARRTAGQITFVIGNSTLKLDIDISEQTKSDLSRYLSDFKADLWELILDENSHITGDAKNSQVAAIGQEALSLVASILSNAQTILKKPKVELKEIQALKPAKEVRPVPRTFMEICTKGSRKHLTSRASEPSYNVPENQYVLYVVSSTLSIVKQLVKVAESKKSRFSGAIEKLNERLDSLKDYRIINRDLVVKDLERLKKRFDTEVINAELSEQLAKINVNLSRSYSEKGYLRLEKATGSENEWWAKIKLSQNDDWQQFEPDGYTIFNSRDHYASLFKAYSDYEIEAKIP…	Salmonella enterica subsp. enterica serovar Senftenberg	Gammaproteobacteria
Gammaproteobacteria	Salmonella enterica subsp. enterica serovar Typhimurium	AAMSZT010000026.1	CJC37_23730	gb|EDK8029456.1|	MALEQVIYNLEEVKGLSDEELYQRLYDSWGLENHKIDVWGELSINVAGNWAGIRNAKTLSGNQSIEYPLADSHELQSGVFLTPSVAKIVLGNDTKGMVACELMLASIPQRAKKNNPFLLAVNDKTVERLTYLPDALPNLDRQALIQNEDETLLRKVIYDAEVKRVKHKIASETEALEAALQEKQQDMTDKLAELSDAFKSTQDKITASTTELESSIKRNEELNNDNHRLNLKIQESKAELDVIIEKSRKVEESMARKVEKLTDFIKEKAIFLKSFEFLDEEDFDFFVGSPLSNKERGEHISFSQALYSNYSDAVSYIQAYLKERDILYPRHIIENFLTLIRTNDLIILAGDSGSGKTNLVQSFAKAIGGVSKIIPVKPNWTSSEDLLGYYNPLEKKYLA…	CJC37_23735	gb|EDK8029457.1|	METPFVIKFIETKWHDKQTLVSVSESEYSLKLEQTGNNAFSAHTTIYPKVDELRFAQLAIKTKQGDQSPPYIVMPNGDRKQLESITDPASNAVWWVEPAHWDAKQRVWRSEARRTAGQITFVIGNSTLKLDIDISEQTKSDLSRYLSDFKADLWELILDENSHITGDAKNSQVAAIDQEALSLVASILSNAQTILKKPKVELKEIQALKPAKEVRPVPRTFMEICTKGSRKHLTSRASEPSYNVPENQYVLYVVLSTLSIVKQLVKVAESKKSRFSGAIEKLNERLDSLKDYRIINRDLVVKDLERLKKRFDTEVINAELASQLGEINANKYFSQNHAAKGYLRLEKTTGSENEWWAKIKPSQHDDWQQFELDGYTIFSSGEYYASLFQPYSDYDMVAI…	Salmonella enterica subsp. enterica serovar Typhimurium	Gammaproteobacteria
Gammaproteobacteria	Salmonella enterica subsp. enterica serovar Senftenberg	AAMZHC010000048.1	CWG63_23555	gb|EDM7364943.1|	MALEQVIYNLEEVKGFSDEELYQRLCESWGITNGKLAVWGKILNGPDSDSRKLPTRLLEIKSLQTGLDTEYPINVRLTMDKGVFVSFKSVEELFGLEDGSFVSCELALAPQSEREKHENPFECNVVVSSVRRLIKLPEYTANDIIKGDENIFLDEAVYKQHLQNVQSRIDSEVTALNAEFEREESSLKAQISSYKDQLQHVQDDLNQKNNVLSQAIAKAQKLEVEHSEWQHKIALQKKAEETMSKKIERLKAYVESKAGFLKSFEFLDDDDFDLFVGSTLSNKDRDEHISFSQAFDSNYSDAVSYIQAHLKERDILYPRHIIENFLTLIRTHDLIILAGDSGSGKTNLVQSFAKAIGGVSKIIPVKPNWTSSEDLLGYYNPLEKKYLVTPFLEALIEAK…	CWG63_23560	gb|EDM7364944.1|	MEAPFVIKFIETKWHDKQTLVSVSESEYSLKLEQTGNNAFSAHTTIYPKVDELRFAQLAIKTKQGDQSPPYIVMPNGDRKQLESITDPASNAVWWVEPAHWDAKQRVWRSEARRTAGQITFVIGNSTLKLDIDISEQTKSDLSRYLSDFKADLWELILDENSHITGDAKNSQVAAIGQEALSLVASILSNAQTILKKPKVELKEIQALKPAKEVRPVPRTFMEICTKGSRKHLTSRASEPSYNVPENQYVLYVVSSTLSIVKQLVKVAESKKSRFSGAIEKLNERLDSLKDYRIINRDLVVKDLERLKKRFDTEVINAELSEQLAKINVNLSRSYSEKGYLRLEKATGSENEWWAKIKLSQNDDWQQFEPDGYTIFSSRDHYASLFKAYSDYEIEAKIP…	Salmonella enterica subsp. enterica serovar Senftenberg	Gammaproteobacteria
Gammaproteobacteria	Salmonella enterica subsp. enterica serovar Mbandaka	AANPJG010000031.1	AC849_004671	gb|EDP9473083.1|	MALEQVIYNLEEVKGLSDEELYQRLYDSWGLENHKIDVWGELSINVAGNWAGIRNAKTLSGNQSIEYPLADSHELQSGVFLTPSVAKIVLGNDTKGMVACELMLASIPQRAKKNNPFLLAVNDKTVERLTYLPDALPNLDRQALIQNEDETLLRKVIYDAEVKRVKHKIASETEALEAALQEKQQDMTDKLAELSDAFKSTQDKITASTTELESSIKRNEELNNDNHRLNLKIQESKAELDVIIEKSRKVEESMARKVEKLTDFIKEKAIFLKSFEFLDEEDFDFFVGSPLSNKERGEHISFSQALYSNYSDAVSYIQAYLKERDILYPRHIIENFLTLIRTNDLIILAGDSGSGKTNLVQSFAKAIGGVSKIIPVKPNWTSSEDLLGYYNPLEKKYLA…	AC849_004672	gb|EDP9473084.1|	METPFVIKFIETKWHDKQTLVSVSESEYSLKLEQTGNNAFSAHTTIYPKVDELRFAQLAIKTKQGDQSPPYIVMPNGDRKQLESITDPASNAVWWVEPAHWDAKQRVWRSEARRTAGQITFVIGNSTLKLDIDISEQTKSDLSRYLSDFKADLWELILDENSHITGDAKNSQVAAIDQEALSLVASILSNAQTILKKPKVELKEIQALKPAKEVRPVPRTFMEICTKGSRKHLTSRASEPSYNVPENQYVLYVVLSTLSIVKQLVKVAESKKSRFSGAIEKLNERLDSLKDYRIINRDLVVKDLERLKKRFDTEVINAELASQLGEINANKYFSQNHAAKGYLRLEKTTGSENEWWAKIKPSQHDDWQQFELDGYTIFSSGEYYASLFQPYSDYDMVAI…	Salmonella enterica subsp. enterica serovar Mbandaka	Gammaproteobacteria
Bacillota	Dorea formicigenerans ATCC 27755	AAXA02000008.1	DORFOR_00464	gb|EDR48129.1|	MRKGEKMKISEFFEYNNQQVLEENENILEYLEQIFGKATEIDREGKKEFTFGKVIGLVTDSFLDEKTKRQKVSMLLCDADSKLLLWNGRPVEILRTNPENRLEEKKSYIQGLFFSGSELFTRNPQPCEEVPGANMVTSFVSDLDEEIRTAEETDENILSLKNKLEDQGYHCNIKVLAQFLLGLNTNQLIILHGAPGMGKTSFVSNIARALGFAYKIIPVRPNWIDNQDLTGYFNPVERRYYSTPFLDALCEAKENPQKHYLICLDEMNLAHVEYYFSDVLSSMESGEGIPLYAHKDQENAWKRQETIMASHNENTVEWLDAKTDQENLKNRYTPEFEIPQNVTFVGTLNMDATTNDLSPKVIDRSCIIKVTKDAGETLCPFEQGVMTLEEMQGEDSFEK…	DORFOR_00465	gb|EDR48130.1|	MQAVFLNNKTCERVHPVRIRKDNPDAEPFYEGMDEPLREIHDIWIMQYLRVDGAYFPRIAFEANEDENIEFDSNQEYEILSRKTDGYIYFIPENFNIYTVGDAQFFYRKNGKKQKIRIHVASMLDGETYEKILKELTAISIRFLYMTMNDGKNRRIKREYLTEYELEIHQLEHTIKEMSETLKALDREPVTDMISRPARQNFRQVKHLDANVIMDHYVLKKPKVRTRVHEKTFHIYENQKVYNFVKLLEKRLWALEQELEDKKMQMNRAAQGENRSKYDDVEENSGVVGTKKSIDELCSTIANLKGKLQAVYQLPMFKNEKYKEQKVYPLQTSNLFVNHKRYKKLFHQMRTYREMGELVEETVQYSSYHKSSEIYEIWCYFKILEIFILEKGYVIDRIS…	Dorea formicigenerans ATCC 27755	Bacillota
Gammaproteobacteria	Salmonella enterica subsp. enterica serovar 4,[5],12:i:-	AANXJV010000088.1	DAI91_005120	gb|EDS4330750.1|	MALEQVIYNLEEVKGLSDEELYQRLYDSWGLENHKIDVWGELSINEAGNWAGIRNAKTLSGNQSIEYPLADSHELQSGVFLTPSVAKIVLGNDTKGMVACELMLASIPQRAKKNNPFLLAVNDKTVERLTYLPDALPNLDRQALIQNEDETLLRKVIYDAEVKRVKHKIASETEALEAALQEKQQDMTDKLAELSDAFKSTQDKITASTTELESSIKRNEELNNDNHRLNLKIQESKAELDVIIEKSRKVEESMARKVEKLTDFIKEKAIFLKSFEFLDEEDFDFFVGSPLSNKERGEHISFSQALYSNYSDAVSYIQAYLKERDILYPRHIIENFLTLIRTNDLIILAGDSGSGKTNLVQSFAKAIGGVSKIIPVKPNWTSSEDLLGYYNPLEKKYLA…	DAI91_005121	gb|EDS4330751.1|	METPFVIKFIETKWHDKQTLVSVSESEYSLKLEQTGNNAFSAHTTIYPKVDELRFAQLAIKTKQGDQSPPYIVMPNGDRKQLESITDPASNAVWWVEPAHWDAKQRVWRSEARRTAGQITFVIGNSTLKLDIDISEQTKSDLSRYLSDFKADLWELILDENSHITGDAKNSQVAAIGQEALSLVASILSNAQTILKKPKVELKEIQALKPAKEVRPVPRTFMEICTKGSRKHLTSRASEPSYNVPENQYVLYVVSSTLSIVKQLVKVAESKKSRFSGAIEKLNERLDSLKDYRIINRDLVVKDLERLKKRFDTEVINAELASQLGEINANKYFSPKHAAKGYLRLEKTTGSENEWWAKIKPSQHDDWQQFELDGYTIFSSGEYYASLFQPYSDYDMVAI…	Salmonella enterica subsp. enterica serovar 4,[5],12:i:-	Gammaproteobacteria
Gammaproteobacteria	Salmonella enterica	AANZBV010000084.1	GPF13_004783	gb|EDS9513602.1|	YSNYSDAVSYIQAYLKERDILYPRHIIENFLTLIRTNDLIILAGDSGSGKTNLVQSFAKAIGGVSKIIPVKPNWTSSEDLLGYYNPLEKKYLATPFLEALIEAKQNPDIPYFICLDEMNLARVEYYFADFLSKLEERNEQPTIQLYSDDEAAHVLAELKGVVSVISNAQEKFSKNGIVDFVALMQDEEINAEMKRAFGFSDKDSLIKYHGDIRRMLAGVLGTPSSITIPANVRIIGAINIDETTHYLSPKILDRAHVMKFKSPLLTDWDAIFDEIDSYGLDDVTLPLVFDIEELGERTPYPKFERLNEFCELFTTLNRDVFDPLGVEFGMRTIRQGLNYVSLFSDVNDNKSLAINNFIVHKVLPKFTFDGDKQVGDYSKAELVSRVFLPRLESLLDNQV…	GPF13_004784	gb|EDS9513603.1|	METPFVIKFIETKWHDKQTLVSVSESEYSLKLEQTGNNAFSAHTTIYPKVDELRFAQLAIKTKQGDQSPPYIVMPNGDRKQLESITDPASNAVWWVEPAHWDAKQRVWRSEARRTAGQITFVIGNSTLKLDIDISEQTKSDLSRYLSDFKADLWELILDENSHITGDAKNSQVAAIDQEALSLVASILSNAQTILKKPKVELKEIQALKPAKEVRPVPRTFMEICTKGSRKHLTSRASEPSYNVPENQYVLYVVLSTLSIVKQLVKVAESKKSRFSGAIEKLNERLDSLKDYRIINRDLVVKDLERLKKRFDTEVINAELASQLGEINANKYFSQNHAAKGYLRLEKTTGSENEWWAKIKPSQHDDWQQFELDGYTIFSSGEYYASLFQPYSDYDMVAI…	Salmonella enterica	Gammaproteobacteria
Gammaproteobacteria	Salmonella enterica subsp. enterica serovar Schwarzengrund str. SL480	ABEJ01000042.1	SeSB_B0026	gb|EDY26980.1|	MALEQVIYNLEEVKGLSDEELYQRLYDSWGLENHKIDVWGELSINVAGNWAGIRNAKTLSGNQSIEYPLADSHELQSGVFLTPSVAKIVLGNDTKGMVACELMLASIPQRAKKNNPFLLAVNDKTVERLTYLPDALPNLDRQALIQNEDETLLRKVIYDAEVKRVKHKIASETEALEAALQEKQQDMTDKLAELSDAFKSTQDKITASTTELESSIKRNEELNNDNHRLNLKIQESKAELDVIIEKSRKVEESMARKVEKLTDFIKEKAIFLKSFEFLDEEDFDFFVGSPLSNKERGEHISFSQALYSNYSDAVSYIQAYLKERDILYPRHIIENFLTLIRTNDLIILAGDSGSGKTNLVQSFAKAIGGVSKIIPVKPNWTSSEDLLGYYNPLEKKYLA…	SeSB_B0027	gb|EDY26987.1|	METPFVIKFIETKWHDKQTLVSVSESEYSLKLEQTGNNAFSAHTTIYPKVDELRFAQLAIKTKQGDQSPPYIVMPNGDRKQLESITDPASNAVWWVEPAHWDAKQRVWRSEARRTAGQITFVIGNSTLKLDIDISEQTKSDLSRYLSDFKADLWELILDENSHITGDAKNSQVAAIDQEALSLVASILSNAQTILKKPKVELKEIQALKPAKEVRPVPRTFMEICTKGSRKHLTSRASEPSYNVPENQYVLYVVLSTLSIVKQLVKVAESKKSRFSGAIEKLNERLDSLKDYRIINRDLVVKDLERLKKRFDTEVINAELASQLGEINANKYFSQNHAAKGYLRLEKTTGSENEWWAKIKPSQHDDWQQFELDGYTIFSSGEYYASLFQPYSDYDMVAI…	Salmonella enterica subsp. enterica serovar Schwarzengrund str. SL480	Gammaproteobacteria
Gammaproteobacteria	Salmonella enterica subsp. enterica serovar Mbandaka	AAPRUI010000041.1	GWG33_22760	gb|EEH1272918.1|	MALEQVIYNLEEVKGFSDEELYQRLCESWGITNGKLAVWGKILNGPDSDSRKLPTRLLEIKSLQTGLDTEYPINVRLTMDKGVFVSFKSVEELFGLEDGSFVSCELALAPQSEREKHENPFECNVVVSSVRRLIKLPEYTANDIIKGDENIFLDEAVYKQHLQNVQSRIDSEVTALNAEFEREESSLKAQISSYKDQLQHVQDDLNQKNNVLSQAIAKAQKLEVEHSEWQHKIALQKKAEETMSKKIERLKAYVESKAGFLKSFEFLDDDDFDLFVGSTLSNKDRDEHISFSQAFDSNYSDAVSYIQAHLKERDILYPRHIIENFLTLIRTHDLIILAGDSGSGKTNLIQSFAKAIGGVSKIIPVKPNWTSSEDLLGYYNPLEKKYLVTPFLEALIEAK…	GWG33_22765	gb|EEH1272919.1|	MEAPFVIKFIETKWHDKQTLVSVSESEYSLKLEQTGNNAFSAHTTIYPKVDELRFAQLAIKTKQGDQSPPYIVMPNGDRKQLESITDPASNAVWWVEPAHWDAKQRVWRSEARRTAGQITFVIGNSTLKLDIDISEQTKSDLSRYLSDFKADLWELILDENSHITGDAKNSQVAAIGQEALSLVASILSNAQTILKKPKVELKEIQALKPAKEVRPVPRTFMEICTKGSRKHLTSRASEPSYNVPENQYVLYVVSSTLSIVKQLVKVAESKKSRFSGAIEKLNERLDSLKDYRIINRDLVVKDLERLKKRFDTEVINAELSEQLAKINVNLSRSYSEKGYLRLEKATGSENEWWAKIKLSQNDDWQQFEPDGYTIFSSRDHYASLFKAYSDYEIEAKIP…	Salmonella enterica subsp. enterica serovar Mbandaka	Gammaproteobacteria
Gammaproteobacteria	Escherichia coli	AAROAB010000095.1	ED315_24180	gb|EEW0970120.1|	MALEQVIYNLEEVKGFSDEELYQCLCESWGITNGKLAVWGKILNGPDSDSRKLPTRLLEIKSLQTGLDTEYPINVRLTMDKGVFVSFKSVEELFGLEDGSFVSCELALAPQSEREKHENPFECNVVVSSVRRLIKLPEYTANDIIKGDENIFLDEAVYKQHLQNVQSRIDSEVTALNAEFEREESSLKAQISSYKDQLQHVQDDLNQKNNVLSQAIAKAQKLEVEHSEWQHKIALQKKAEETMSKKIERLKAYVESKAGFLKNFEFLDDDDFDLFVGSTLSNKDRDEHISFSQAFDSNYSDAVSYIQAHLKERDILYPRHIIENFLTLIRTHDLIILAGDSGSGKTNLVQSFAKAIGGVSKIIPVKPNWTSSEDLLGYYNPLEKKYLVTPFLEALIEAK…	ED315_24185	gb|EEW0970121.1|	MEAPFVIKFIETKWHDKQTLVSVSESEYSLKLEQTGNNAFSAHTTIYPKVDELRFAQLAIKTKQGDQSPPYIVMPNGDRKQLESITDPASNAVWWVEPAHWDAKQRVWRSEARRTAGQITFVIGNSTLKLDIDISEQTKSDLSRYLSDFKADLWELILDENSHITGDAKNSQVAAIGQEALSLVASILSNAQTILKKPKVELKEIQALKPAKEVRPVPRTFMEICTKGSRKHLTSRASEPSYNVPENQYVLYVVSSTLSIVKQLVKVAESKKSRFSGAIEKLNERLDSLKDYRIINRDLVVKDLERLKKRFDTEVINAELSEQLAKINVNLSRSYSEKGYLRLEKATGSENEWWAKIKLSQNDDWQQFEPDGYTIFNSRDHYASLFKAYSDYEIEAKIP…	Escherichia coli	Gammaproteobacteria
Gammaproteobacteria	Escherichia coli	AASHWB010000060.1	CRA17_004593	gb|EFC5419366.1|	MALEQVIYNLEEVKGFSDEELYQRLCESWGITNGKLAVWGKILNGPDSDSRKLPTRLLEIKSLQTGLDTEYPINVRLTMDKGVFVSFKSVEELFGLEDGSFVSCELALAPQSEREKHENPFECNVVVSSVRRLIKLPEYTANDIIKGDENIFLDEAVYKQHLQNVQSRIDSEVTALNAEFEREESSLKAQISSYKDQLQHVQDDLNQKNNVLSQAIAKAQKLEVEHSEWQHKIALQKKAEETMSKKIERLKAYVESKAGFLKSFEFLDDDDFDLFVGSTLSNKDRDEHISFSQAFDSNYSDAVSYIQAHLKERDILYPRHIIENFLTLIRTHDLIILAGDSGSGKTNLVQSFAKAIGGVSKIIPVKPNWTSSEDLLGYYNPLEKKYLVTPFLEALIEAK…	CRA17_004594	gb|EFC5419367.1|	MEAPFVIKFIETKWHDKQTLVSVSESEYSLKLEQTGNNAFSAHTTIYPKVDELRFAQLAIKTKQGDQSPPYIVMPNGDRKQLESITDPASNAVWWVEPAHWDAKQRVWRSEARRTAGQITFVIGNSTLKLDIDISEQTKSDLSRYLSDFKADLWELILDENSHITGDAKNSQVAAIGQEALSLVASILSNAQTILKKPKVELKEIQALKPAKEVRPVPRTFMEICTKGSRKHLTSRASEPSYNVPENQYVLYVVSSTLSIVKQLVKVAESKKSRFSGAIEKLNERLDSLKDYRIINRDLVVKDLERLKKRFDTEVINAELSEQLAKINVNLSRSYSEKGYLRLEKATGSENEWWAKIKLSQNDDWQQFEPDGYTIFSSRDHYASLFKAYSDYEIEAKIP…	Escherichia coli	Gammaproteobacteria
Gammaproteobacteria	Escherichia coli	AASOAS010000038.1	F6J47_22895	gb|EFE7797357.1|	MALEQVIYNLEEVKGFSDEELYQRLCESWGITNGKLAVWGKILNGPDSDSRKLPTRLLEIKSLQTGLDTEYPINVRLTMDKGVFVSFKSVEELFGLEDGSFVSCELALAPQSEREKHENPFECNVVVSSVRRLIKLPEYTANDIIKGDENIFLDEAVYKQHLQNVQSRIDSEVTALNAEFEREESSLKAQISSYKDQLQHVQDDLNQKNNVLSQAIAKAQKLEVEHSEWQHKIALQKKAEETMSKKIERLKAYVESKAGFLKSFEFLDDDDFDLFVGSTLSNKDRDEHISFSQAFDSNYSDAVSYIQAHLKERDILYPRHIIENFLTLIRTHDLIILAGDSGSGKTNLVQSFAKAIGGVSKIIPVKPNWTSSEDLLGYYNPLEKKYLVTPFLEALIEAK…	F6J47_22900	gb|EFE7797358.1|	MEAPFVIKFIETKWHDKQTLVSVSESEYSLKLEQTGNNAFSAHTTIYPKVDELRFAQLAIKTKQGDQSPPYIVMPNGDRKQLESITDPASNAVWWVEPAHWDAKQRVWRSEARRTAGQITFVIGNSTLKLDIDISEQTKSDLSRYLSDFKADLWELILDENSHITGDAKNSQVAAIGQEALSLVASILSNAQTILKKPKVELKEIQALKPAKEVRPVPRTFMEICTKGSRKHLTSRASEPSYNVPENQYVLYVVSSTLSIVKQLVKVAESKKSRFSGAIEKLNERLDSLKDYRIINRDLVVKDLERLKKRFDTEVINAELSEQLAKINVNLSRSYSEKGYLRLEKATGSENEWWAKIKLSQNDDWQQFEPDGYTIFSSRDHYASLFKAYSDYEIEAKIP…	Escherichia coli	Gammaproteobacteria
Gammaproteobacteria	Escherichia coli	AASWAS010000074.1	F9399_19855	gb|EFH4911584.1|	MALEQVIYNLEEVKGLSDEELYQRLYDSWGLENHKIDVWGELSINEAGNWAGIRNAKTLSGNQSIEYPLADSHELQSGVFLTPSVAKIVLGNDTKGMVACELMLASIPQRAKKNNPFLLAVNDKTVERLTYLPDALPNLDRQALIQNEDETLLRKVIYDAEVKRVKHKIASETEALEAALQEKQQDMTDKLAELSDAFKSTQDKITASTTELESSIKRNEELNNDNHRLNLKIQESKAELDVIIEKSRKVEESMARKVEKLTDFIKEKAIFLKSFEFLDEEDFDFFVGSPLSNKERGEHISFSQALYSNYSDAVSYIQAYLKERDILYPRHIIENFLTLIRTNDLIILAGDSGSGKTNLVQSFAKAIGGVSKIIPVKPNWTSSEDLLGYYNPLEKKYLA…	F9399_19860	gb|EFH4911585.1|	METPFVIKFIETKWHDKQTLVSVSESEYSLKLEQTGNNAFSAHTTIYPKVDELRFAQLAIKTKQGDQSPPYIVMPNGDRKQLESITDPASNAVWWVEPAHWDAKQRVWRSEARRTAGQITFVIGNSTLKLDIDISEQTKSDLSRYLSDFKADLWELILDENSHITGDAKNSQVAAIDQEALSLVASILSNAQTILKKPKVELKEIQALKPAKEVRPVPRTFMEICTKGSRKHLTSRASEPSYNVPENQYVLYVVSSTLSIVKQLVKVAESKKSRFSGAIEKLNERLDSLKDYRIINRDLVVKDLERLKKRFDTEVINAELASQLGEINANKYFSTNHAAKGYLRLEKTTGSENEWWAKIKPSQHDDWQQFELDGYTIFSSGEYYASLFQPYSDYDMVAI…	Escherichia coli	Gammaproteobacteria
Gammaproteobacteria	Escherichia coli	AASXDZ010000052.1	GU811_21715	gb|EFH8538997.1|	MALEQVIYNLEEVKGFSDEELYQRLCESWGITNGKLAVWGKILNGPDSDSRKLPTRLLEIKSLQTGLDTEYPINVRLTMDKGVFVSFKSVEELFGLEDGSFVSCELALAPQSEREKHENPFECNVVVSSVRRLIKLPEYTANDIIKGDENIFLDEAVYKQHLQNVQSRIDSEVTALNAEFEREESSLKAQISSYKDQLQHVQDDLNQKNNVLSQAIAKAQKLEVEHSEWQHKIALQKKAEETMSKKIERLKAYVESKAGFLKSFEFLDDDDFDLFVGSTLSNKDRDEHISFSQAFDSNYSDAVSYIQAHLKERDILYPRHIIENFLTLIRTHDLIILAGDSGSGKTNLVQSFAKAIGGVSKIIPVKPNWTSSEDLLGYYNPLEKKYLVTPFLEALIEAK…	GU811_21720	gb|EFH8538998.1|	MEAPFVIKFIETKWHDKQTLVSVSESEYSLKLEQTGNNAFSAHTTIYPKVDELRFAQLAIKTKQGDQSPPYIVMPNGDRKQLESITDPASNAVWWVEPAHWDAKQRVWRSEARRTAGQITFVIGNSTLKLDIDISEQTKSDLSRYLSDFKADLWELILDENSHITGDAKNSQVAAIGQEALSLVASILSNAQTILKKPKVELKEIQALKPAKEVRPVPRTFMEICTKGSRKHLTSRASEPSYNVPENQYVLYVVSSTLSIVKQLVKVAESKKSRFSGAIEKLNERLDSLKDYRIINRDLVVKDLERLKKRFDTEVINAELSEQLAKINVNLSRSYSEKGYLRLEKATGSENEWWAKIKLSQNDDWQQFEPDGYTIFSSRDHYASLFKAYSDYEIEAKIP…	Escherichia coli	Gammaproteobacteria
Gammaproteobacteria	Escherichia coli	AATISL010000036.1	VT18_20685	gb|EFL7416557.1|	MALEQVIYNLEEVKGLSDEELYQRLYDSWGLENHKIDVWGELSINEAGNWAGIRNAKTLSGNQSIEYPLADSHELQSGVFLTPSVAKIVLGNDTKGMVACELMLASIPQRAKKNNPFLLAVNDKTVERLTYLPDALPNLDRQALIQNEDETLLRKVIYDAEVKRVKHKIASETEALEAALQEKQQDMTDKLAELSDAFKSTQDKITASTTELESSIKRNEELNNDNHRLNLKIQESKAELDVIIEKSRKVEESMARKVEKLTDFIKEKAIFLKSFEFLDEEDFDFFVGSPLSNKERGEHISFSQALYSNYSDAVSYIQAYLKERDILYPRHIIENFLTLIRTNDLIILAGDSGSGKTNLVQSFAKAIGGVSKIIPVKPNWTSSEDLLGYYNPLEKKYLA…	VT18_20690	gb|EFL7416558.1|	METPFVIKFIETKWHDKQTLVSVSESEYSLKLEQTGNNAFSAHTTIYPKVDELRFAQLAIKTKQGDQSPPYIVMPNGDRKQLESITDPASNAVWWVEPAHWDAKQRVWRSEARRTAGQITFVIGNSTLKLDIDISEQTKSDLSRYLSDFKADLWELILDENSHITGDAKNSQVAAIDQEALSLVASILSNVQTILKKPKVELKEIQALKPAKEVRPVPRTFMEICTKGSRKHLTSRASEPSYNVPENQYVLYVVSSTLSIVKQLVKVAESKKSRFSGAIEKLNERLDSLKDYRIINRDLVVKDLERLKKRFDTEVINAELASQLGEINANKYFSTNHAAKGYLRLEKTTGSENEWWAKIKPSQHDDWQQFELDGYTIFSSGEYYASLFQPYSDYDMVAI…	Escherichia coli	Gammaproteobacteria
Gammaproteobacteria	Escherichia coli O19	AATQVR010000095.1	DP907_22720	gb|EFO3147978.1|	MALEQVIYNLEEVKGFSDEELYQCLCESWGITNGKLAVWGKILNGPDSDSRKLPTRLLEIKSLQTGLDTEYPINVRLTMDKGVFVSFKSVEELFGLEDGSFVSCELALAPQSEREKHENPFECNVVVSSVRRLIKLPEYTANDIIKGDENIFLDEAVYKQHLQNVQSRIDSEVTALNAEFEREESSLKAQISSYKDQLQHVQDDLNQKNNVLSQAIAKAQKLEVEHSEWQHKIALQKKAEETMSKKIERLKAYVESKAGFLKSFEFLDDDDFDLFVGSTLSNKDRDEHISFSQAFDSNYSDAVSYIQAHLKERDILYPRHIIENFLTLIRTHDLIILAGDSGSGKTNLVQSFAKAIGGVSKIIPVKPNWTSSEDLLGYYNPLEKKYLVTPFLEALIEAK…	DP907_22725	gb|EFO3147979.1|	MEAPFVIKFIETKWHDKQTLVSVSESEYSLKLEQTGNNAFSAHTTIYPKVDELRFAQLAIKTKQGDQSPPYIVMPNGDRKQLESITDPASNAVWWVEPAHWDAKQRVWRSEARRTAGQITFVIGNSTLKLDIDISEQTKSDLSRYLSDFKADLWELILDENSHITGDAKNSQVAAIGQEALSLVASILSNAQTILKKPKVELKEIQALKPAKEVRPVPRTFMEICTKGSRKHLTSRASEPSYNVPENQYVLYVVSSTLSIVKQLVKVAESKKSRFSGAIEKLNERLDSLKDYRIINRDLVVKDLERLKKRFDTEVINAELSEQLAKINVNLSRSYSEKGYLRLEKATGSENEWWAKIKLSQNDDWQQFEPDGYTIFNSRDHYASLFKAYSDYEIEAKIP…	Escherichia coli O19	Gammaproteobacteria
Gammaproteobacteria	Escherichia coli	AAVODM010000048.1	H9J69_004713	gb|EGC5213157.1|	MALEQVIYNLEEVKGFSDEELYQRLCESWGITNGKLAVWGKILNGPDSDSRKLPTRLLEIKSLQTGLDTEYPINVRLTMDKGVFVSFKSVEELFGLEDGSFVSCELALAPQSEREKHENPFECNVVVSSVRRLIKLPEYTANDIIKGDENIFLDEAVYKQHLQNVQSRIDSEVTALNAEFEREESSLKAQISSYKDQLQHVQDDLNQKNNVLSQAIAKAQKLEVEHSEWQHKIALQKKAEETMSKKIERLKAYVESKAGFLKSFEFLDDDDFDLFVGSTLSNKDRDEHISFSQAFDSNYSDAVSYIQAHLKERDILYPRHIIENFLTLIRTHDLIILAGDSGSGKTNLVQSFAKAIGGVSKIIPVKPNWTSSEDLLGYYNPLEKKYLVTPFLEALIEAK…	H9J69_004712	gb|EGC5213156.1|	MEAPFVIKFIETKWHDKQTLVSVSESEYSLKLEQTGNNAFSAHTTIYPKVDELRFAQLAIKTKQGDQSPPYIVMPNGDRKQLESITDPASNAVWWVEPAHWDAKQRVWRSEARRTAGQITFVIGNSTLKLDIDISEQTKSDLSRYLSDFKADLWELILDENSHITGDAKNSQVAAIGQEALSLVASILSNAQTILKKPKVELKEIQALKPAKEVRPVPRTFMEICTKGSRKHLTSRASEPSYNVPENQYVLYVVSSTLSIVKQLVKVAESKKSRFSGAIEKLNERLDSLKDYRIINRDLVVKDLERLKKRFDTEVINAELSEQLAKINVNLSRSYSEKGYLRLEKATGSENEWWAKIKLSQNDDWQQFEPDGYTIFNSRDHYASLFKAYSDYEIEAKIP…	Escherichia coli	Gammaproteobacteria
Gammaproteobacteria	Vibrio vulnificus	AAXNCZ010000003.1	FR267_03595	gb|EGR0055691.1|	MILEPVIYDLEEVKGLSDEELYQRLCESWGITNGKLAVWGRIQSGPDSDSRKLPTRLLDIKSLQTGIDTEYPINVRLTMDKGVFVSFKSVEELFGLEDGSFVSCELALAPQSEREKHENPFECNVVVGSVRRLVKLPEYTANDIIKGDESIFLDDAVYKLHLQNVQSRIDSEVSALNAEFEREESSLKAQISSYQDQLQQTQDDLNQKNNVLSQAIAKNQKLQDEHSVWQHKIALQKKAEETMSKKIERLKAYVESKAGFLKSFEFLDDEDFDFFVGNRSASEQQGEHLSFSQALDSNYNDAVSYIQSHLKERDILYPRHIIENFLTLIRTNDLIILAGDSGSGKTNLVQSFAKAIGGVSKIIPVKPNWTSSEDLLGYYNPLEKKYLATPFLEALIEAK…	FR267_03600	gb|EGR0055692.1|	MEAPFVIKFIETKWHDKQTLVSVSESEYSLKLEQTGNNAFSAHTTIYPKVDELRFAQLAIKTKYGDQSPPYIVMPNGDRKQLESITDPASNAVWWVDPAHWDAKQRVWRSEARRTAGQITFVIGNSTLKLDIDISEQTKSDLSRYLSDFKADLWELILDENSHITGDAKNSQVAAIDQEALSLVASILSNAQTILKKPKVELKEIQALKPAKEVRPVPRTFMEICTKGSRKHLTSRASEPSYNVPENQYVLYVVSSTLSIVKQLVRVAESKTNRFSGAVEKLNERLSELKGYKKVNRDLLVKDLERLKRLYDVDYINEELSKSLALINTTNKIPSLQTNNGYIRLEGTTKERDGWFIQLKYSADGTWQALEDGKFTILKPSLPYFRLFQKESEYEIRAN…	Vibrio vulnificus	Gammaproteobacteria
Gammaproteobacteria	Vibrio cholerae	AAXNGU010000030.1	FG089_15200	gb|EGR0490920.1|	MDDNKLTFDKSYAKQLDDKELYKCLFDAWGVLNDKIQVWGRLETNAQGNWAGIKQAKLVQTGEPIEYPLPNSRELQSGVYLHPEAAKNLLKGKNSVFIKGELRLASMRLRQSTDNPFLLELMSSNVELLTELPKFNTEDVMQSELSTLISENIYRDFLTLLESKTAVDEEKARSKIEQVEIEFKSRQENLRHLTKEIEDSLTGLKNERGLLQKQLSELEIEQNVVKSNIEQEQLTLKAIIEKQQQIEDEMSKKIERLKRYVEEKAGFLKDFEFIDEDLYAELSGNKPVSDDFMTGLSFVNDFGSDYSQLTSYLQAYLKEQGQYYSRHIIENYLTLIRTNDLVILAGDSGSGKTSLVQSFAQAVGGVAKIIPVKPNWTSSEDLLGYYNPLERKYLATPFL…	FG089_15205	gb|EGR0490921.1|	MSNANFVIKYIETRWHDKATLLEVTESQYPLSLDEVSYDSFEASTTIYPNVEDLYHSQIAITYSDRRCSAPPAIILSDGSTMPLKKIVHPENGKVWWVEPGEWNPKSKEWRNNTHRTAGVINFRIEKQTLELHITLSDASKDQLDKYLVDFKSDMWELILDESSYVQGDTKRSIVGSVDETLLKLVDSLLSAARYVLKKPKSELREIQTLKPRKAVKPVPRTFMEIATKGNTRVLTSRGSKPNFNVSENSYVLYALMATQRIVSQLCRVSQSKIDRLNNNLHKLEQRIDSLKDYHKVNRDLVVKDYQAALERVNVDKLNSDITQQLERIESLNTTALCSTGFLKLKGMTKQKDGYFCEIKYGINEPWQKLSAKSLILNLDDTYLSLFKPHTEYRLTAHM…	Vibrio cholerae	Gammaproteobacteria
Gammaproteobacteria	Vibrio cholerae	AAXOLK010000008.1	DDN70_07035	gb|EGR4182816.1|	MDDNKLTFDKSYAKQLDDKELYKCLFDAWGVLNDKIQVWGRLETNAQGNWAGIKQAKLVQTGEPIEYPLPNSRELQSGVYLHPEAAKNLLKGKNSVFIKGELRLASMRLRQSTDNPFLLELMSSNVELLTELPKFNTEDVMQSELSTLISENIYRDFLTLLESKTAVDEEKARSKIEQVEIEFKSRQENLRHLTKEIEDSLTGLKNERGLLQKQLSELEIEQNVVKSNIEQEQLTLKAIIEKQQQIEDEMSKKIERLKRYVEEKAGFLKDFEFIDEDLYAELSGNKPVSDDFMTGLSFVNDFGSDYSQLTSYLQAYLKEQGQYYSRHIIENYLTLIRTNDLVILAGDSGSGKTSLVQSFAQAVGGVAKIIPVKPNWTSSEDLLGYYNPLERKYLATPFL…	DDN70_07040	gb|EGR4182817.1|	MSNANFVIKYIETRWHDKATLLEVTESQYPLSLDEVSYDSFEASTTIYPNVEDLYHSQIAITYSDRRCSAPPAIILSDGSTMPLKKIVHPENGKVWWVEPGEWNPKSKEWRNNTHRTAGVINFRIEKQTLELHITLSDASKDQLDKYLVDFKSDMWELILDESSYVQGDTKRSIVGSVDETLLKLVDSLLSAARYVLKKPKSELREIQTLKPRKAVKPVPRTFMEIATKGNTRVLTSRGSKPNFNVSENSYVLYALMATQRIVSQLCRVSQSKIDRLNNNLHKLEQRIDSLKDYHKVNRDLVVKDYQAALERVNVDKLNSDITQQLERIESLNTTALCSTGFLKLKGMTKQKDGYFCEIKYGINEPWQKLSAKSLILNLDDTYLSLFKPHTEYRLTAHM…	Vibrio cholerae	Gammaproteobacteria
Gammaproteobacteria	Vibrio cholerae	AAXONU010000054.1	DDN80_18015	gb|EGR4407514.1|	MALEQVIYNLEEVKGLSDEELYQRLYDSWGLENHKIDVWGELSINEAGNWAGIRNAKTLSGNQSIEYPLADSHELQSGVFLTPSVAKIVLGNDTKGMVACELMLASIPQRAKKNNPFLLAVNDKTVERLTYLPDALPNLDRQALIQNEDETLLRKVIYDAEVKRVKHKIASETEALEAALQEKQQDMTDKLAELSDAFKSTQDKITASTTELESSIKRNEELNNDNHRLNLKIQESKAELDVIIEKSRKVEESMARKVEKLTDFIKEKAIFLKSFEFLDEEDFDFFVGSPLSNKERGEHISFSQALYSNYSDAVSYIQAYLKERDILYPRHIIENFLTLIRTNDLIILAGDSGSGKTNLVQSFAKAIGGVSKIIPVKPNWTSSEDLLGYYNPLEKKYLA…	DDN80_18020	gb|EGR4407515.1|	MEAPFVIKFIETKWHDKQTLVSVSESEYSLKLEQTGNNAFSAHTTIYPKVDELRFAQLAIKTKQGDQSPPYIAMPNGERRQLESITDPASNEEWWVEPAHWDAKQRVWRSEARRTAGQIMFVIGSSTLKLDIDISEQTKSDLSRYLSDFKADLWELILDESSHITGDAKNSQVAAIDQEALSLVASILSNAQTILKKPKVELKESQALKPAKEVRPVPRTFMEICTKGSRKHLTSRAPEPSYNVPENQYVLYVVSNTLSIVKQLVRVAESKMSRFSGAIEKLNERLDSLKDYRTINRDLVVKDLERLKKRFDTEVINAELASQLGEINANKYFSPNHAAKGYLRLEKTTGSENEWWAKIKPSQHDDWQQFELDGYTIFSSGEHYASLFKPYSDYDMVAI…	Vibrio cholerae	Gammaproteobacteria
Gammaproteobacteria	Vibrio cholerae	AAXOWK010000012.1	CLP36_11620	gb|EGR5486118.1|	MDDNKLTFDKSYAKQLDDKELYKCLFDAWGVLNDKIQVWGRLETNAQGNWAGIKQAKLVQTGEPIEYPLPNSRELQSGVYLHPEAAKNLLKGKNSVFIKGELRLASMRLRQSTDNPFLLELMSSNVELLTELPKFNTEDVMQSELSTLISENIYRDFLTLLESKTAVDEEKARSKIEQVEIEFKSRQENLRHLTKEIEDSLTGLKNERGLLQKQLSELEIEQNVVKSNIEQEQLTLKAIIEKQQQIEDEMSKKIERLKRYVEEKAGFLKDFEFIDEDLYAELSGNKPVSDDFMTGLSFVNDFGSDYSQLTSYLQAYLKEQGQYYSRHIIENYLTLIRTNDLVILAGDSGSGKTSLVQSFAQAVGGVAKIIPVKPNWTSSEDLLGYYNPLERKYLATPFL…	CLP36_11625	gb|EGR5486119.1|	MSNANFVIKYIETRWHDKATLLEVTESQYPLSLDEVSYDSFEASTTIYPNVEDLYHSQIAITYSDRRCSAPPAIILSDGSTMPLKKIVHPENGKVWWVEPGEWNPKSKEWRNNTHRTAGVINFRIEKQTLELHITLSDASKDQLDKYLVDFKSDMWELILDESSYVQGDTKRSIVGSVDETLLKLVDSLLSAARYVLKKPKSELREIQTLKPRKAVKPVPRTFMEIATKGNTRVLTSRGSKPNFNVSENSYVLYALMATQRIVSQLCRVSQSKIDRLNNNLHKLEQRIDSLKDYHKVNRDLVVKDYQAALERVNVDKLNSDITQQLERIESLNTTALCSTGFLKLKGMTKQKDGYFCEIKYGINEPWQKLSAKSLILNLDDTYLSLFKPHTEYRLTAHM…	Vibrio cholerae	Gammaproteobacteria
Gammaproteobacteria	Vibrio parahaemolyticus	AAXOZF010000016.1	BS053_21010	gb|EGR5892748.1|	MDDNKLTFDKSYAKQLDDKELYKCLFDAWGVLNDKIQVWGRLETNAQGNWAGIKQAKLVQTGEPIEYPLPNSRELQSGVYLHPEAAKNLLKGKNSVFIKGELRLASMRLRQSTDNPFLLELMSSNVELLTELPKFNTEDVMQSELSTLISENIYRDFLTLLESKTAVDEEKARSKIEQVEIEFKSRQENLRHLTKEIEDSLTGLKNERGLLQKQLSELEIEQNVVKSNIEQEQLTLKAIIEKQQQIEDEMSKKIERLKRYVEEKAGFLKDFEFIDEDLYAELSGNKPVSDDFMTGLSFVNDFGSDYSQLTSYLQAYLKEQGQYYSRHIIENYLTLIRTNDLVILAGDSGSGKTSLVQSFAQAVGGVAKIIPVKPNWTSSEDLLGYYNPLERKYLATPFL…	BS053_21005	gb|EGR5892747.1|	MSNANFVIKYIETRWHDKATLLEVTESQYPLSLDEVSYDSFEASTTIYPNVEDLYHSQIAITYSDRRCSAPPAIILSDGSTMPLKKIVHPENGKVWWVEPGEWNPKSKEWRNNTHRTAGVINFRIEKQTLELHITLSDASKDQLDKYLVDFKSDMWELILDESSYVQGDTKRSIVGSVDETLLKLVDSLLSAARYVLKKPKSELREIQTLKPRKAVKPVPRTFMEIATKGNTRVLTSRGSKPNFNVSENSYVLYALMATQRIVSQLCRVSQSKIERINNNLHKLEQRIDSLKDYHKVNRDLVVKDYQAALERVNVDKLNSDITQQLERIESLNTTALCSTGFLKLKGMTKQKDGYFCEIKYGINEPWQKLSAKSLILNLDDTYLSLFKPHTEYRLTAHM…	Vibrio parahaemolyticus	Gammaproteobacteria
Gammaproteobacteria	Salmonella enterica subsp. enterica serovar 3,10[15][15,34]:e,h:-	AAXSFB010000029.1	IU959_004553	gb|EGS5047853.1|	MALEQVIYNLEEVKGFSDEELYQCLCESWGITNGKLAVWGKILNGPDSDSRKLPTRLLEIKSLQTGLDTEYPINVRLTMDKGVFVSFKSVEELFGLEDGSFVSCELALAPQSEREKHENPFECNVVVSSVRRLIKLPEYTANDIIKGDENIFLDEAVYKQHLQNVQSRIDSEVTALNAEFEREESSLKAQISSYKDQLQHVQDDLNQKNNVLSQAIAKAQKLEVEHSEWQHKIALQKKAEETMSKKIERLKAYVESKAGFLKSFEFLDDDDFDLFVGSTLSNKDRDEHISFSQAFDSNYSDAVSYIQAHLKERDILYPRHIIENFLTLIRTHDLIILAGDSGSGKTNLVQSFAKAIGGVSKIIPVKPNWTSSEDLLGYYNPLEKKYLVTPFLEALIEAK…	IU959_004554	gb|EGS5047854.1|	MEAPFVIKFIETKWHDKQTLVSVSESEYSLKLEQTGNNAFSAHTTIYPKVDELRFAQLAIKTKQGDQSPPYIVMPNGDRKQLESITDPASNAVWWVEPAHWDAKQRVWRSEARRTAGQITFVIGNSTLKLDIDISEQTKSDLSRYLSDFKADLWELILDENSHITGDAKNSQVAAIGQEALSLVASILSNAQTILKKPKVELKEIQALKPAKEVRPVPRTFMEICTKGSRKHLTSRASEPSYNVPENQYVLYVVSSTLSIVKQLVKVAESKKSRFSGAIEKLNERLDSLKDYRIINRDLVVKDLERLKKRFDTEVINAELSEQLAKINVNLSRSYSEKGYLRLEKATGSENEWWAKIKLSQNDDWQQFEPDGYTIFNSRDHYASLFKAYSDYEIEAKIP…	Salmonella enterica subsp. enterica serovar 3,10[15][15,34]:e,h:-	Gammaproteobacteria
Gammaproteobacteria	Morganella morganii	AAXWEA010000020.1	B7O29_18265	gb|EGT5569177.1|	MVSEKVIYDFDEVKGLSDEELYQRLYDSWGLKNHKIEVWGELSINDAGNWAGIRNAKTLNGNQSIEYPLTDSHDLQSGVFLSPSVAKIVLGNDTKGMVACELMLASIPQRAKKNNPFLLAVNDKTVERLTYLPDALTNLERQPLIHHENETLIRKVIYDAEIRRVKYKIASETEALEAALQEKQQNMANKLAELSDIFKSTQDKITISKTELESSIKRNEELNNDNHRLNLKIQESKAELDVVIKKSRRIEESMTRKVEKLTEYIKEKAIFLKNLEFVDDEDFDFFVGNTLSNQQRGEHISFSKSLDSNYSYAVSYIQAHLKERDILYPRHIIENFLTLIRTNDLIILAGDSGSGKTNLVQSFAKAIGGVSKIIPVKPNWTSSEDLLGYYNPLEKKYLT…	B7O29_18260	gb|EGT5569176.1|	MEAPFVIKFIETKWHDKQTLVSVSESEYSLKLEQTGNNAFSAHTTIYPKVDELRFAQLAIKTKYGDHSPPYIAMPNGQRRQLESIIDPASNTVWWVEPAHWDEKRRVWRSEARRTAGQIMFVIGNSTLKLDIDISEQTKSDLSRYLSDFKVDLWEMILNENSHITGEAKNSQVAAVDQRTLSLVASILSNAQTIIKKPKVELKEIQTLKPVKEVRPVSRTFTEIYAKGLRKHLTSRVSEPSYNVPENQYVLYVVSTTLNIVKQLVRVAESKTSRFSGAVEKLNERLGSLKDYRLINRDLVVKDLERLKKRFDTDAINDDLADKLAEINANKYLSPNLAAKGYPRLYLRLEKATGSENEWWAKIKPSLSADWQQFEQDGYTIFSSVGPYATLFKPYSDYE…	Morganella morganii	Gammaproteobacteria
Gammaproteobacteria	Salmonella enterica subsp. enterica serovar Mbandaka	AAXWSR010000047.1	JEC30_004778	gb|EGT7006964.1|	MALEQVIYNLEEVKGFSDEELYQRLCESWGITNGKLAVWGKILNGPDSDSRKLPTRLLEIKSLQTGLDTEYPINVRLTMDKGVFVSFKSVEELFGLEDGSFVSCELALAPQSEREKHENPFECNVVVSSVRRLIKLPEYTANDIIKGDENIFLDEAVYKQHLQNVQSRIDSEVTALNAEFEREESSLKAQISSYKDQLQHVQDDLNQKNNVLSQAIAKAQKLEVEHSEWQHKIALQKKAEETMSKKIERLKAYVESKAGFLKSFEFLDDDDFDLFVGSTLSNKDRDEHISFSQAFDSNYSDAVSYIQAHLKERDILYPRHIIENFLTLIRTHDLIILAGDSGSGKTNLVQSFAKAIGGVSKIIPVKPNWTSSEDLLGYYNPLEKKYLVTPFLEALIEAK…	JEC30_004777	gb|EGT7006963.1|	MEAPFVIKFIETKWHDKQTLVSVSESEYSLKLEQTGNNAFSAHTTIYPKVDELRFAQLAIKTKQGDQSPPYIVMPNGDRKQLESITDPASNAVWWVEPAHWDAKQRVWRSEARRTAGQITFVIGNSTLKLDIDISEQTKSDLSRYLSDFKADLWELILDENSHITGDAKNSQVAAIGQEALSLVASILSNAQTILKKPKVELKEIQALKPAKEVRPVPRTFMEICTKGSRKHLTSRASEPSYNVPENQYVLYVVSSTLSIVKQLVKVAESKKSRFSGAIEKLNERLDSLKDYRIINRDLVVKDLERLKKRFDTEVINAELSEQLAKINVNLSRSYSEKGYLRLEKATGSENEWWAKIKLSQNDDWQQFEPDGYTIFNSRDHYASLFKAYSDYEIEAKIP…	Salmonella enterica subsp. enterica serovar Mbandaka	Gammaproteobacteria
Gammaproteobacteria	Salmonella enterica subsp. enterica serovar Mbandaka	AAYUVD010000039.1	JKV89_004621	gb|EHA9687130.1|	MALEQVIYNLEEVKGFSDEELYQRLCESWGITNGKLAVWGKILNGPDSDSRKLPTRLLEIKSLQTGLDTEYPINVRLTMDKGVFVSFKSVEELFGLEDGSFVSCELALAPQSEREKHENPFECNVVVSSVRRLIKLPEYTANDIIKGDENIFLDEAVYKQHLQNVQSRIDSEVTALNAEFEREESSLKAQISSYKDQLQHVQDDLNQKNNVLSQAIAKAQKLEVEHSEWQHKIALQKKAEETMSKKIERLKAYVESKAGFLKSFEFLDDDDFDLFVGSTLSNKDRDEHISFSQAFDSNYSDAVSYIQAHLKERDILYPRHIIENFLTLIRTHDLIILAGDSGSGKTNLVQSFAKAIGGVSKIIPVKPNWTSSEDLLGYYNPLEKKYLVTPFLEALIEAK…	JKV89_004620	gb|EHA9687129.1|	MEAPFVIKFIETKWHDKQTLVSVSESEYSLKLEQTGNNAFSAHTTIYPKVDELRFAQLAIKTKQGDQSPPYIVMPNGDRKQLESITDPASNAVWWVEPAHWDAKQRVWRSEARRTAGQITFVIGNSTLKLDIDISEQTKSDLSRYLSDFKADLWELILDENSHITGDAKNSQVAAIGQEALSLVASILSNAQTILKKPKVELKEIQALKPAKEVRPVPRTFMEICTKGSRKHLTSRASEPSYNVPENQYVLYVVSSTLSIVKQLVKVAESKKSRFSGAIEKLNERLDSLKDYRIINRDLVVKDLERLKKRFDTEVINAELSEQLAKINVNLSRSYSEKGYLRLEKATGSENEWWAKIKLSQNDDWQQFEPDGYTIFNSRDHYASLFKAYSDYEIEAKIP…	Salmonella enterica subsp. enterica serovar Mbandaka	Gammaproteobacteria
Gammaproteobacteria	Salmonella enterica subsp. enterica serovar Mbandaka	AAYUWD010000044.1	JK133_004757	gb|EHA9803033.1|	MALEQVIYNLEEVKGFSDEELYQRLCESWGITNGKLAVWGKILNGPDSDSRKLPTRLLEIKSLQTGLDTEYPINVRLTMDKGVFVSFKSVEELFGLEDGSFVSCELALAPQSEREKHENPFECNVVVSSVRRLIKLPEYTANDIIKGDENIFLDEAVYKQHLQNVQSRIDSEVTALNAEFEREESSLKAQISSYKDQLQHVQDDLNQKNNVLSQAIAKAQKLEVEHSEWQHKIALQKKAEETMSKKIERLKAYVESKAGFLKSFEFLDDDDFDLFVGSTLSNKDRDEHISFSQAFDSNYSDAVSYIQAHLKERDILYPRHIIENFLTLIRTHDLIILAGDSGSGKTNLVQSFAKAIGGVSKIIPVKPNWTSSEDLLGYYNPLEKKYLVTPFLEALIEAK…	JK133_004756	gb|EHA9803032.1|	MEAPFVIKFIETKWHDKQTLVSVSESEYSLKLEQTGNNAFSAHTTIYPKVDELRFAQLAIKTKQGDQSPPYIVMPNGDRKQLESITDPASNAVWWVEPAHWDAKQRVWRSEARRTAGQITFVIGNSTLKLDIDISEQTKSDLSRYLSDFKADLWELILDENSHITGDAKNSQVAAIGQEALSLVASILSNAQTILKKPKVELKEIQALKPAKEVRPVPRTFMEICTKGSRKHLTSRASEPSYNVPENQYVLYVVSSTLSIVKQLVKVAESKKSRFSGAIEKLNERLDSLKDYRIINRDLVVKDLERLKKRFDTEVINAELSEQLAKINVNLSRSYSEKGYLRLEKATGSENEWWAKIKLSQNDDWQQFEPDGYTIFNSRDHYASLFKAYSDYEIEAKIP…	Salmonella enterica subsp. enterica serovar Mbandaka	Gammaproteobacteria
Gammaproteobacteria	Enterobacter hormaechei	ABANSY010000006.1	I4B32_002477	gb|EHN8865680.1|	MALEQVIYNLEEVKGFSDEELYQRLCESWGITNGKLAVWGKILNGPDSDSRKLPTRLLEIKSLQTGLDTEYPINVRLTMDKGVFVSFKSVEELFGLEDGSFVSCELALAPQSEREKHENPFECNVVVSSVRRLIKLPEYTANDIIKGDENIFLDEAVYKQHLQNVQSRIDSEVTALNAEFEREESSLKAQISSYKDQLQHVQDDLNQKNNVLSQAIAKAQKLEVEHSEWQHKIALQKKAEETMSKKIERLKAYVESKAGFLKSFEFLDDDDFDLFVGSTLSNKDRDEHISFSQAFDSNYSDAVSYIQAHLKERDILYPRHIIENFLTLIRTHDLIILAGDSGSGKTNLVQSFAKAIGGVSKIIPVKPNWTSSEDLLGYYNPLEKKYLVTPFLEALIEAK…	I4B32_002476	gb|EHN8865679.1|	MEAPFVIKFIETKWHDKQTLVSVSESEYSLKLEQTGNNAFSAHTTIYPKVDELRFAQLAIKTKQGDQSPPYIVMPNGDRKQLESITDPASNAVWWVEPAHWDAKQRVWRSEARRTAGQITFVIGNSTLKLDIDISEQTKSDLSRYLSDFKADLWELILDENSHITGDAKNSQVAAIGQEALSLVASILSNAQTILKKPKVELKEIQALKPAKEVRPVPRTFMEICTKGSRKHLTSRASEPSYNVPENQYVLYVVSSTLSIVKQLVKVAESKKSRFSGAIEKLNERLDSLKDYRIINRDLVVKDLERLKKRFDTEVINAELSEQLAKINVNLSRSYSEKGYLRLEKATGSENEWWAKIKLSQNDDWQQFEPDGYTIFNSRDHYASLFKAYSDYEIEAKIP…	Enterobacter hormaechei	Gammaproteobacteria
Gammaproteobacteria	Escherichia coli	ABBGNZ010000054.1	KXV05_004658	gb|EHT2982007.1|	MALEQVIYNLEEVKGFSDEELYQRLCESWGITNGKLAVWGKILNGPDSDSRKLPTRLLEIKSLQTGLDTEYPINVRLTMDKGVFVSFKSVEELFGLEDGSFVSCELALAPQSEREKHENPFECNVVVSSVRRLIKLPEYTANDIIKGDENIFLDEAVYKQHLQNVQSRIDSEVTALNAEFEREESSLKAQISSYKDQLQHVQDDLNQKNNVLSQAIAKAQKLEVEHSEWQHKIALQKKAEETMSKKIERLKAYVESKAGFLKSFEFLDDDDFDLFVGSTLSNKDRDEHISFSQAFDSNYSDAVSYIQAHLKERDILYPRHIIENFLTLIRTHDLIILAGDSGSGKTNLVQSFAKAIGGVSKIIPVKPNWTSSEDLLGYYNPLEKKYLVTPFLEALIEAK…	KXV05_004657	gb|EHT2982006.1|	MEAPFVIKFIETKWHDKQTLVSVSESEYSLKLEQTGNNAFSAHTTIYPKVDELRFAQLAIKTKQGDQSPPYIVMPNGDRKQLESITDPASNAVWWVEPAHWDAKQRVWRSEARRTAGQITFVIGNSTLKLDIDISEQTKSDLSRYLSDFKADLWELILDENSHITGDAKNSQVAAIGQEALSLVASILSNAQTILKKPKVELKEIQALKPAKEVRPVPRTFMEICTKGSRKHLTSRASEPSYNVPENQYVLYVVSSTLSIVKQLVKVAESKKSRFSGAIEKLNERLDSLKDYRIINRDLVVKDLERLKKRFDTEVINAELSEQLAKINVNLSRSYSEKGYLRLEKATGSENEWWAKIKLSQNDDWQQFEPDGYTIFNSRDHYASLFKAYSDYEIEAKIP…	Escherichia coli	Gammaproteobacteria
Gammaproteobacteria	Escherichia coli	ABCXTK010000022.1	G6K48_004044	gb|EIG2045708.1|	MALEQVIYNLEEVKGFSDEELYQRLCESWGITNGKLAVWGKILNGPDSDSRKLPTRLLEIKSLQTGLDTEYPINVRLTMDKGVFVSFKSVEELFGLEDGSFVSCELALAPQSEREKHENPFECNVVVSSVRRLIKLPEYTANDIIKGDENIFLDEAVYKQHLQNVQSRIDSEVTALNAEFEREESSLKAQISSYKDQLQHVQDDLNQKNNVLSQAIAKAQKLEVEHSEWQHKIALQKKAEETMSKKIERLKAYVESKAGFLKSFEFLDDDDFDLFVGSTLSNKDRDEHISFSQAFDSNYSDAVSYIQAHLKERDILYPRHIIENFLTLIRTHDLIILAGDSGSGKTNLVQSFAKAIGGVSKIIPVKPNWTSSEDLLGYYNPLEKKYLVTPFLEALIEAK…	G6K48_004045	gb|EIG2045709.1|	MEAPFVIKFIETKWHDKQTLVSVSESEYSLKLEQTGNNAFSAHTTIYPKVDELRFAQLAIKTKQGDQSPPYIVMPNGDRKQLESITDPASNAVWWVEPAHWDAKQRVWRSEARRTAGQITFVIGNSTLKLDIDISEQTKSDLSRYLSDFKADLWELILDENSHITGDAKNSQVAAIGQEALSLVASILSNAQTILKKPKVELKEIQALKPAKEVRPVPRTFMEICTKGSRKHLTSRASEPSYNVPENQYVLYVVSSTLSIVKQLVKVAESKKSRFSGAIEKLNERLDSLKDYRIINRDLVVKDLERLKKRFDTEVINAELSEQLAKINVNLSRSYSEKGYLRLEKATGSENEWWAKIKLSQNDDWQQFEPDGYTIFNSRDHYASLFKAYSDYEIEAKIP…	Escherichia coli	Gammaproteobacteria
Gammaproteobacteria	Klebsiella pneumoniae subsp. pneumoniae WGLW2	AMLM01000032.1	HMPREF1306_05373	gb|EKB69929.1|	MALEQVIYNLEEVKGFSDEELYQRLCESWGITNGKLAVWGKILNGPDSDSRKLPTRLLEIKSLQTGLDTEYPINVRLTMDKGVFVSFKSVEELFGLEDGSFVSCELALAPQSEREKHENPFECNVVVSSVRRLIKLPEYTANDIIKGDENIFLDEAVYKQHLQNVQSRIDSEVTALNAEFEREESSLKAQISSYKDQLQHVQDDLNQKNNVLSQAIAKAQKLEVEHSEWQHKIALQKKAEETMSKKIERLKAYVESKAGFLKSFEFLDDDDFDLFVGSTLSNKDRDEHISFSQAFDSNYSDAVSYIQAHLKERDILYPRHIIENFLTLIRTHDLIILAGDSGSGKTNLVQSFAKAIGGVSKIIPVKPNWTSSEDLLGYYNPLEKKYLVTPFLEALIEAK…	HMPREF1306_05374	gb|EKB69930.1|	MEAPFVIKFIETKWHDKQTLVSVSESEYSLKLEQTGNNAFSAHTTIYPKVDELRFAQLAIKTKQGDQSPPYIVMPNGDRKQLESITDPASNAVWWVEPAHWDAKQRVWRSEARRTAGQITFVIGNSTLKLDIDISEQTKSDLSRYLSDFKADLWELILDENSHITGDAKNSQVAAIGQEALSLVASILSNAQTILKKPKVELKEIQALKPAKEVRPVPRTFMEICTKGSRKHLTSRASEPSYNVPENQYVLYVVSSTLSIVKQLVKVAESKKSRFSGAIEKLNERLDSLKDYRIINRDLVVKDLERLKKRFDTEVINAELSEQLAKINVNLSRSYSEKGYLRLEKATGSENEWWAKIKLSQNDDWQQFEPDGYTIFNSRDHYASLFKAYSDYEIEAKIP…	Klebsiella pneumoniae subsp. pneumoniae WGLW2	Gammaproteobacteria
Bacillota	Clostridium celatum DSM 1785	AMEZ01000013.1	HMPREF0216_00353	gb|EKY28994.1|	MDKRETGNKELKRLEAKKKKEFKKIDEIELLLKTINKELSEKEELKKTFEKYGFSFENNNKESAVRGKTKISKDKYIEYIQSYLASREEKPLYYSKEILEQFYAGLCTNQLVVLSGQPGTGKTSLVEGFCNAIAAKLKIISVQPNWTDNQDLLGFFNPIEGTYISTPFLDAIIEAENNPEQLHIICLDEMNLAHVEYYFSEFLSKLQSEDNIITLYSKNLYEEAREEIFSKIELFTNKREENALNVEEGISLLKNIDINEYYKLKKQWKSINTYKNEFKIPSNIRFVGTINKDETTKSLSPKVVDRSYIMEINPYSIKLVEDLKNKIENDRIECKENLYLKANCFKRNTKILSKELREELNALELLLRKFDITLTNRIRQQVNELYGSEIISENNIFDA…	HMPREF0216_00352	gb|EKY28993.1|	MKLISHMISISYSKEEDISMLPKGIKIDPRYKVLKIANITKLPKEEYEDRTILGEERSEGWIIKTHYVGKGINSPKKRYRIAFEPVLENNENINDFYLRIKVTNKDQEVDYLRYCPKNNLFFDTDYFYKDNGNIVRTLGLANDTSGRFFIEIIRKDNSVIEKTIPILVLPSSLSYEDYLKMIRELREIKEDIILNDKSKVGIGELWVTKKENIEKIIGELEKSINIINKNPISSLTQEYIKKSYNQINKMTSKTLIEKSMYPYKNSFTAVNYSENLDVYENRVIKYVLCTLKEKVRSYKEFYDDYIIEEKNNIKKVKDNFKQITNISVEAKRKEIKDKKALEYELIKRVSKLPNRLNVKSNCRLGIFKNAEIDDMSIKIMFDYSKKKFRLQFTSIGKNI…	Clostridium celatum DSM 1785	Bacillota
Bacillota	Halobacillus sp. BAB-2008	ANPF01000046.1	D479_11191	gb|ELK46304.1|	MGAITKEVYTSLSPEQKNSYISDRMQLEDFWLVGRVSNPVEDKPFFFIRQLINPYNGSALNRQIFTGEGLRELSIYCRKKKGEELKNGCLVAAKFKLSKSQFEIGKGNILETTFPDVHPIEDSDAIFDLIGMQKKDLGILALAKPSLYEGEESRFVDAAELIKAKVANDLSDLNDQQNEHKQQLDRLKEEGDRLTQTKQKLFALQNDLEKLGFTFDEDEREEQLEVEEDFLPIPSNPYELLKGIQEQIGERGFLYQEQTLRHLFLSLMTEQMVVLSGPSGTGKTTIVKQLAKVMNARYEIIPVQPSWTDKQDLLGFYNPMRRLYIPSSFLDCLIEAGKNKTQLYFICLDEMNLAQIEYYLADLLSKRELKGEKVRLYSDFEYKQNEQELKWITQQVYQD…	D479_11186	gb|ELK46303.1|	MAIEVYMIKVFYDHRKTPINKMLPVSGLDVGERIEMNNDGEWVIPNHYRSQKQKSIRQIGIRFVGEQQEMESVLLSSPDGTFTSTFIYSEEKDIWFEPTFFSSKKNGKKNYYNFDESSLVTGMTNAGQAKLVSMVGSQRNVMGSVRFIPSSLPMEEYEEMVAELYKIHEDLVRDNRNMARVGINSQTIVMELQEQLDKLTSAIQQISATPHAVLELQTTKKKPKAYGRFDMQMEIEKYMNPGKPSYRSRSLLPVTATYENKLIKQLLEDLVQYASVMGTQEPTSMSHLRNISNELDMYFRKSDTEIQCTLGSADMVEDGEIYDRVHQKYSQVIERYAQGERTVREAAIAKVHFAQSREIDQDMEYIELEVELAGAFTKENKYYHHLSSAGMEAYFKYAK…	Halobacillus sp. BAB-2008	Bacillota
Gammaproteobacteria	Klebsiella pneumoniae JHCK1	ANGH02000186.1	MTE1_5432	gb|EMH90520.1|	MALEQVIYNLEEVKGFSDEELYQRLCESWGITNGKLAVWGKILNGPDSDSRKLPTRLLEIKSLQTGLDTEYPINVRLTMDKGVFVSFKSVEELFGLEDGSFVSCELALAPQSEREKHENPFECNVVVSSVRRLIKLPEYTANDIIKGDENIFLDEAVYKQHLQNVQSRIDSEVTALNAEFEREESSLKAQISSYKDQLQHVQDDLNQKNNVLSQAIAKAQKLEVEHSEWQHKIALQKKAEETMSKKIERLKAYVESKAGFLKSFEFLDDDDFDLFVGSTLSNKDRDEHISFSQAFDSNYSDAVSYIQAHLKERDILYPRHIIENFLTLIRTHDLIILAGDSGSGKTNLVQSFAKAIGGVSKIIPVKPNWTSSEDLLGYYNPLEKKYLVTPFLEALIEAK…	MTE1_5433	gb|EMH90522.1|	MEAPFVIKFIETKWHDKQTLVSVSESEYSLKLEQTGNNAFSAHTTIYPKVDELRFAQLAIKTKQGDQSPPYIVMPNGDRKQLESITDPASNAVWWVEPAHWDAKQRVWRSEARRTAGQITFVIGNSTLKLDIDISEQTKSDLSRYLSDFKADLWELILDENSHITGDAKNSQVAAIGQEALSLVASILSNAQTILKKPKVELKEIQALKPAKEVRPVPRTFMEICTKGSRKHLTSRASEPSYNVPENQYVLYVVSSTLSIVKQLVKVAESKKSRFSGAIEKLNERLDSLKDYRIINRDLVVKDLERLKKRFDTEVINAELSEQLAKINVNLSRSYSEKGYLRLEKATGSENEWWAKIKLSQNDDWQQFEPDGYTIFNSRDHYASLFKAYSDYEIEAKIP…	Klebsiella pneumoniae JHCK1	Gammaproteobacteria
Gammaproteobacteria	Klebsiella pneumoniae BIDMC 11	JCNF01000016.1	L438_10008	gb|EWE84465.1|	MALEQVIYNLEEVKGFSDEELYQRLCESWGITNGKLAVWGKILNGPDSDSRKLPTRLLEIKSLQTGLDTEYPINVRLTMDKGVFVSFKSVEELFGLEDGSFVSCELALAPQSEREKHENPFECNVVVSSVRRLIKLPEYTANDIIKGDENIFLDEAVYKQHLQNVQSRIDSEVTALNAEFEREESSLKAQISSYKDQLQHVQDDLNQKNNVLSQAIAKAQKLEVEHSEWQHKIALQKKAEETMSKKIERLKAYVESKAGFLKSFEFLDDDDFDLFVGSTLSNKDRDEHISFSQAFDSNYSDAVSYIQAHLKERDILYPRHIIENFLTLIRTHDLIILAGDSGSGKTNLVQSFAKAIGGVSKIIPVKPNWTSSEDLLGYYNPLEKKYLVTPFLEALIEAK…	L438_10007	gb|EWE84464.1|	MEAPFVIKFIETKWHDKQTLVSVSESEYSLKLEQTGNNAFSAHTTIYPKVDELRFAQLAIKTKQGDQSPPYIVMPNGDRKQLESITDPASNAVWWVEPAHWDAKQRVWRSEARRTAGQITFVIGNSTLKLDIDISEQTKSDLSRYLSDFKADLWELILDENSHITGDAKNSQVAAIGQEALSLVASILSNAQTILKKPKVELKEIQALKPAKEVRPVPRTFMEICTKGSRKHLTSRASEPSYNVPENQYVLYVVSSTLSIVKQLVKVAESKKSRFSGAIEKLNERLDSLKDYRIINRDLVVKDLERLKKRFDTEVINAELSEQLAKINVNLSRSYSEKGYLRLEKATGSENEWWAKIKLSQNDDWQQFEPDGYTIFNSRDHYASLFKAYSDYEIEAKIP…	Klebsiella pneumoniae BIDMC 11	Gammaproteobacteria
Gammaproteobacteria	Photobacterium leiognathi lrivu.4.1	DF196821.1	PLEI_3448	gb|GAD31785.1|	MDKGVFVSFKSVEELFGIEDGSFVSCELALAPQSEREKHENPFECNVLVSSVRRLVKLPEYTAEDIIKGDENIFLDDSVYKLHLQNVQARIDNEVSVLNAEFDREESSLKAQISSYKDQLQQTQDDLNQKNNVLSKAIEKAQKLEDEHSELQQKIALQKKAEETMSRKIERLKAYVESKAGFLKSLEFLDDDDFDLFVGSTLSNRHSDEHISFSQAFDSNYSDAVSYIQAHLKERDILYPRHIIENFLTLIRTNDLIILAGDSGSGKTNLVQSFAKAIGGVSKIIPVKPNWTSSEDLLGYYNPLEKKYLATPFLEALIEAKQNPDIPYFICLDEMNLARVEYYFADFLSKLEERNEQPTIQLYSDDEAAHVLAELKGVVSIISNAQEKFSKNGIVDFVA…	PLEI_3449	gb|GAD31786.1|	MPPPSRRGTASILYPEYISKLTILADSRSLLRDKDKFSKLREQGIALNENGWKSKLTPEELSEQEKERETIRKRLSYFASEHEKVGMVYQVLAPKIKPFQQVEKEWRQCKVKSKSTFPNSMTFVQNPAYQAVHSGFKKLKEQIGLADEDILLSLEKIEAIGLVNMPLLYERWCLLQIIKVLTHAFRYQPEDNWKRKLIANIQGNEEQISIQFFNPSVSRTITLQYEPFLANGKRPDFVLDVEAITKSGYQISKRLVVDAKYYSATYLKQRGGIGGVIHELYKVKDYSEGQENNVFVLHPVLDAVEKVVSPQEWAKDSYLGELSMFDWESTYHECQATSYGAVCANPMKSQRYLDEIQRMLGMFLQYGIEDNTPSRAESDDTQAINFCVSCGSEKVSDVT…	Photobacterium leiognathi lrivu.4.1	Gammaproteobacteria
Bacillota	Fictibacillus barbaricus	BMCE01000002.1	GCM10007199_29670	gb|GGB61876.1|	MNTTEIESNITTLEKWLETKAVEDISLLIKENLEQSFTKPSLNRFEKRLKNEVFGSTIVFRVESFETFNDKNKIERLKVNAVVMQPSKTGYTTCSHPIDASKLWYVSSVIQSNRFSEELKRGILFFASFRAAYDDKHLADLITFDLNSYKEIELSFTDLLKNFGGNQLVEAAQDIFGTDVEKVIAEKLLLASESTWTSLVTSEKEITKKRLSLGKREKAYEERLQVLEANEKRWIKILERTKEMIRLETEYELKNNIVPEEHEWDNGTIIKLLQSLIYHNSDDDLIYDPTIIESFLRGLQANILVVLSGPSGTGKSSLVTAVANTLKGAKSKIIPVQSSWTDTQDLLGYFNPLEKRFVASPFLEALSEAQEDSENLYFICLDEMNLAHVEYYFSEFLSA…	GCM10007199_29660	gb|GGB61869.1|	MNLYQIYIRESVPEHSTSSFLYEEMDLEVYDPLIKIEQYYLMNEYSKVNNKTLRIGVYAPEAAHVFISNGNVKKYLVESKIHLGMWYEASRGWYEEGFLERSESCFGMNACGEWKVSAVSDEGKTLNEKRVVVIPRTFSYAQYRTMQAEVKSLFEGLTAEPEEGSYLKELQIPLFRLEELVLILEEFKDWALVICKNPSEKLVKSKEKMTRSKISKWDSHSILEAAMFPFREKILIQTSIKELNLEEHQMIRYMIEAFVEQVKQSMVIENSALKQLEFELNKRYETLNVINGLMKVFIEKRCTSLERDINWLKERQKKWEHCDSMLRMILSENLYMVDPVMPELTHLFSQDPSYGAVYELYEKFENMVPKMDSEERAFLEAVMSSPRLYEIWILLQLIH…	Fictibacillus barbaricus	Bacillota
Alphaproteobacteria	Gemmobacter megaterium	BMEH01000001.1	GCM10011345_05900	gb|GGE03243.1|	MRFVWDLPEDKPIRVIGRVWLKALADGRELWFLDDIEHPEKGVGLHYPTLSMDNKDAVVASAFVPPGPSRRVIDPQVAASGGQWAVAELELSPVAERQKQRNPWLMNVRSATLRPLSEIPVDWHVAVTGPESARRISTLARGEIENYLRKLVLDEDEELARRLVENDRALDNLVAARRQAEVEAAAVQAQVDAELSLHHQRRDEAERSVIEVQSQLRVEQERLAAYQRTVEQEKQTMEIAYRRLEELLSEKGDRLVALGLADAEDVAVLLPHLGAMEDAREGISFDDALPGGFAQLAPLLQCRMAQQGLLYSQPQLRDFLALLRTRDLVVLAGDSGSGKTSLVRATAKVIGGACTIIPVKPNWTGPEDLLGYFNPIQRSYQATPFLLALQAAARNPLVP…	GCM10011345_05890	gb|GGE03239.1|	MGVSAHYLDIDWDSPGIARRIEVSTYPIEIDTANDGTMHAEVSIFRNFAPWVGLQLSGQLANVEPATVDADGERHPWLPVLDEHGAVWWIPATGWSKPSSRHLSEMHRSFGTFSVELGPSRNLVIDAVANELDRAHAQEYLDDFQDELVWLAIGKPTGALGEAGSDYSRDLVDALREFAYAAGRILEHPALEIREVTALVHQSRLRPNAETFRAVLRRPGAHLYPGRSAQESADVPENRYLRGLVQHCRRVAQSIARSSSRHHGHLAARSAREKARAADLLATARIEVDQEIFDNQLADIRRHMDAIANWADGSVLSRSTEREYRFSVGKKYEGKGGGLFYRNLDGDSPNGAGEHFQVSVVQFPEGLHELVREAQGIDKDLTLALVGKASVRPFTTANG…	Gemmobacter megaterium	Alphaproteobacteria
Alphaproteobacteria	Sphingopyxis bauzanensis	BMMC01000001.1	GCM10011393_03270	gb|GGJ36189.1|	MRKPQTGKPYPAGLATEGDYATLKEAIERSPSDLLDELRFVWDLPEDKPIRVIGRVWLKALADGRELWFFDDIEHPEKGVGLLYPTLSNPSGHKDAVVASAFVPPGPSRKVIDPQVAASGRQWAVAELELSPVAERQKQRNPWLMNVRSGTLRPLSELPVDWHVGVTGPESARRISALARGEIEDYLRKLVLDEDKELARRLEENDKELNNLAAARRQAEADAAEVHAEVEAELSSHRQRRDEAEHGVIEAQSQLREEQERLAAYQRTVEQGKQTMEIAYRRLEELLSAKGDRLVALGLADAEDVAALLPHLGTMEEAREGTSFADALPGGFAQLAPLLQSRMAEQGLLYSQAQLRDFLALLRTRDLVVLAGDSGSGKTSLVRAAAKAIGGACTIIPVK…	GCM10011393_03260	gb|GGJ36184.1|	MGVSAHHLEIEWDSSGIARRIEVSTYPIEIATARDGTMHAEVSIFRNFAPWVGLQLSGQLASVEPATVDAQGERHPWLPVLDKHGAVWWIPATSWSKPNSRYLSEMHRSFGTFSVELGPYRSLVIDAVANELDRAHAQEYLDDFRDELVWLAIGKPTGALGEVGSDYSRDLVDALGEFAQAAGRVLEHPAQEIREVTALAPPSRLRPNAETFRSVMRRPGARLYPGRAAQESADVPENRYLRGLVQHCRRVAQSLARSSSRHHGHLAARSAREKARAADLLVTEQIEVDQEIFDNQLADIRRRMDAIANWAVGSVLSRSNEREYRFSVGKKYEGKGGGLFYRNLDGDSQNGGGERFQFSVAQLPEGLHELVREAQSIDKDLTLALMGKASVSSFTTAKG…	Sphingopyxis bauzanensis	Alphaproteobacteria
Deinococcota	Deinococcus malanensis	BMPP01000018.1	GCM10008955_34840	gb|GGK37973.1|	MVFGELEDLEAYYNTNNPKEPVLKIGKLILDKKLKETHKLTHGEYILVQISPENLPKVSNHKAWGIFICKITPEQYHQFTINHPLMGKDNIYTLWNEFTNIQRNIQAEVDKAFEERSQIIRNREIELERVKDTYDTDYQNKIDGLTEEQAELKEKYKELAIAQENLKIRETEFEQAVKWYDRVGGQEAFERAAAARLKFTHFTPHERRSKRPLAVIKSLQNAIRESGFQVLDESLDQNSDQTLESWLTCFLASTLTGQLLLLSGPAGAGKSALCMRLSQLLGVAYSVIPVRPSWTEASDLLGFYSQTRSSFNATPFTEALMSAVEHDKGDGLSLISLDEINLSRLEDYAADLLSQWEKTFQAHEVGCIRLYAESIYDDLELAEEAKSKSHMLNKVIFPP…	GCM10008955_34830	gb|GGK37968.1|	MQLIFEGRDEGTQNWIALPISTLPEGIYANYLQYSGEWRVRLAHGYQTRRIYARANNGEMLELEYDSSSNSFSPKKKTRLSESGTGQLYLYNTNQEQLSPSLDIHPNGLSENDFKAIIERLKYLAINESSYVGAALHNELSNSSGQISQASPYLPVEYALSSAQGLIHLGKVLRQHWPYIERQHSMRLASLRQTVPSSRAERSARGQEALSRNPTRPTVTVYAKRRTTNTPENQFLSFLLIDVLVKKARRIENQLQELAGYTQDHLSKQTDHQERTKKDIASLEIAKAELEGSIAIKKKDVEKNPSLKASNSPNLIQLKREKEKLTREIFAKENEHKRTKARIEILTGSLEKLITAQKALTDNSVWSSRALTVPWLKGVVPLRASPTRPSPYLVRSEHY…	Deinococcus malanensis	Deinococcota
Cyanobacteriota	Rivularia sp. IAM M-261	BPQA01000020.1	RIVM261_088850	gb|GJD23929.1|	MVFNPDESVKSNMWIIPLLPERLSGRVRKKLDGGRFFIEPSVNGLPLTDGKIVQEFFAVRGEVNTDDYVTFRWKNPGQPEFDNVKKQYGNPLAIDVKVVSKDEALYLADEIRETLETELRQQLKQQQDMLQQEQETLAQQAEELAQQRTQDLKNELDRKAQELETLEISLNKERQCLDKRQEYIELLASEAQKAKHLWADLEPYRLAIPLVSEDVISDVTEPIPLPQNLGLQWNEMLHSSGLPLPKYIGTSYLLALISALYSGSLVLLNGSVGVGKTSLIRHSGNLLNGKSKVIPVRPAWLDSSDLLGFFDPLSETFRPSPFLTALKDAKKHSDQVYLVCLDELNLAKIENYGADLLSSLEYSRSEHGNQGLLLYSESIETELWEEAKQLNKEQQRESN…	RIVM261_088840	gb|GJD23928.1|	MISENQLKQCITEIGLLGLSTSIILTEKLRLHEGCKTEYVGLQWLPSARILGTATALLDLAKVVKNNWNAIEKRPLKTIKTEIASVDIKRATCSTYALIQAKLNPYKRQTLGVSRVESHECNENEFLCYVLDVYLRDLGNGIANVLNSLTIEDILLPPIPPKFQQERPHFMAALVERVQKRNILIDDERKKISETVAQLKACAEWASQVRKAKFLENIVTPDEPPYASLRLRGSLTYGSIFEQYLNCRADTMAAIEKVVYLYKCTYQGQLLPRWEIYKIWCIVRLYSTFILYTNMLPPVGEATMFERIRIKRGIIELPKNQDFKLIGYLDNGQSFSIKFCLEPELISNANKITTPDIKLKIITQNQEMQYCFNIKDRNYGKEGYTHFIEDVIKEARNIY…	Rivularia sp. IAM M-261	Cyanobacteriota
Gammaproteobacteria	Salmonella enterica	DAAHPN010000020.1	GYJ67_23635	gb|HAB6970323.1|	MALEQVIYNLEEVKGLSDEELYQRLYDSWGLENHKIDVWGELSINVAGNWAGIRNAKTLSGNQSIEYPLADSHELQSGVFLTPSVAKIVLGNDTKGMVACELMLASIPQRAKKNNPFLLAVNDKTVERLTYLPDALPNLDRQALIQNEDETLLRKVIYDAEVKRVKHKIASETEALEAALQEKQQDMTDKLAELSDAFKSTQDKITASTTELESSIKRNEELNNDNHRLNLKIQESKAELDVIIEKSRKVEESMARKVEKLTDFIKEKAIFLKSFEFLDEEDFDFFVGSPLSNKERGEHISFSQALYSNYSDAVSYIQAYLKERDILYPRHIIENFLTLIRTNDLIILAGDSGSGKTNLVQSFAKAIGGVSKIIPVKPNWTSSEDLLGYYNPLEKKYLA…	GYJ67_23640	gb|HAB6970324.1|	METPFVIKFIETKWHDKQTLVSVSESEYSLKLEQTGNNAFSAHTTIYPKVDELRFAQLAIKTKQGDQSPPYIVMPNGDRKQLESITDPASNAVWWVEPAHWDAKQRVWRSEARRMAGQITFVIGNSTLKLDIDISEQTKSDLSRYLSDFKADLWELILDENSHITGDAKNSQVAAIDQEALSLVASILSNAQTILKKPKVELKEIQALKPAKEVRPVPRTFMEICTKGSRKHLTSRASEPSYNVPENQYVLYVVLSTLSIVKQLVKVAESKKSRFSGAIEKLNERLDSLKDYRIINRDLVVKDLERLKKRFDTEVINAELASQLGEINANKYFSQNHAAKGYLRLEKTTGSENEWWAKIKPSQHDDWQQFELDGYTIFSSGEYYASLFQPYSDYDMVAI…	Salmonella enterica	Gammaproteobacteria
Gammaproteobacteria	Salmonella enterica	DAAPZW010000023.1	G1225_23780	gb|HAD8420813.1|	MALEQVIYNLEEVKGLSDEELYQRLYDSWGLENHKIDVWGELSINVAGNWAGIRNAKTLSGNQSIEYPLADSHELQSGVFLTPSVAKIVLGNDTKGMVACELMLASIPQRAKKNNPFLLAVNDKTVERLTYLPDALPNLDRQALIQNEDETLLRKVIYDAEVKRVKHKIASETEALEAALQEKQQDMTDKLAELSDAFKSTQDKITASTTELESSIKRNEELNNDNHRLNLKIQESKAELDVIIEKSRKVEESMARKVEKLTDFIKEKAIFLKSFEFLDEEDFDFFVGSPLSNKERGEHISFSQALYSNYSDAVSYIQAYLKERDILYPRHIIENFLTLIRTNDLIILAGDSGSGKTNLVQSFAKAIGGVSKIIPVKPNWTSSEDLLGYYNPLEKKYLA…	G1225_23785	gb|HAD8420814.1|	METPFVIKFIETKWHDKQTLVSVSESEYSLKLEQTGNNAFSAHTTIYPKVDELRFAQLAIKTKQGDQSPPYIVMPNGDRKQLESITDPASNAVWWVEPAHWDAKQRVWRSEARRMAGQITFVIGNSTLKLDIDISEQTKSDLSRYLSDFKADLWELILDENSHITGDAKNSQVAAIDQEALSLVASILSNAQTILKKPKVELKEIQALKPAKEVRPVPRTFMEICTKGSRKHLTSRASEPSYNVPENQYVLYVVLSTLSIVKQLVKVAESKKSRFSGAIEKLNERLDSLKDYRIINRDLVVKDLERLKKRFDTEVINAELASQLGEINANKYFSQNHAAKGYLRLEKTTGSENEWWAKIKPSQHDDWQQFELDGYTIFSSGEYYASLFQPYSDYDMVAI…	Salmonella enterica	Gammaproteobacteria
Gammaproteobacteria	Salmonella enterica	DAAQAC010000017.1	G1233_23600	gb|HAD8429998.1|	MALEQVIYNLEEVKGLSDEELYQRLYDSWGLENHKIDVWGELSINVAGNWAGIRNAKTLSGNQSIEYPLADSHELQSGVFLTPSVAKIVLGNDTKGMVACELMLASIPQRAKKNNPFLLAVNDKTVERLTYLPDALPNLDRQALIQNEDETLLRKVIYDAEVKRVKHKIASETEALEAALQEKQQDMTDKLAELSDAFKSTQDKITASTTELESSIKRNEELNNDNHRLNLKIQESKAELDVIIEKSRKVEESMARKVEKLTDFIKEKAIFLKSFEFLDEEDFDFFVGSPLSNKERGEHISFSQALYSNYSDAVSYIQAYLKERDILYPRHIIENFLTLIRTNDLIILAGDSGSGKTNLVQSFAKAIGGVSKIIPVKPNWTSSEDLLGYYNPLEKKYLA…	G1233_23605	gb|HAD8429999.1|	METPFVIKFIETKWHDKQTLVSVSESEYSLKLEQTGNNAFSAHTTIYPKVDELRFAQLAIKTKQGDQSPPYIVMPNGDRKQLESITDPASNAVWWVEPAHWDAKQRVWRSEARRMAGQITFVIGNSTLKLDIDISEQTKSDLSRYLSDFKADLWELILDENSHITGDAKNSQVAAIDQEALSLVASILSNAQTILKKPKVELKEIQALKPAKEVRPVPRTFMEICTKGSRKHLTSRASEPSYNVPENQYVLYVVLSTLSIVKQLVKVAESKKSRFSGAIEKLNERLDSLKDYRIINRDLVVKDLERLKKRFDTEVINAELASQLGEINANKYFSQNHAAKGYLRLEKTTGSENEWWAKIKPSQHDDWQQFELDGYTIFSSGEYYASLFQPYSDYDMVAI…	Salmonella enterica	Gammaproteobacteria
Gammaproteobacteria	Escherichia coli	DABAJH010000113.1	HHG97_004583	gb|HAH1170752.1|	MALEQVIYNLEEVKGLSDEELYQRLYDSWGLENHKIDVWGELSINEAGNWAGIRNAKTLSGNQSIEYPLADSHELQSGVFLTPSVAKIVLGNDTKGMVACELMLASIPQRAKKNNPFLLAVNDKTVERLTYLPDALPNLDRQALIQNEDETLLRKVIYDAEVKRVKHKIASETEALEAALQEKQQDMTDKLAELSDAFKSTQDKITASTTELESSIKRNEELNNDNHRLNLKIQESKSELDVIIEKSRKVEESMARKVEKLTDFIKEKAIFLKSFEFLDEEDFDFFVGSPLSNKERGEHISFSQALYSNYSDAVSYIQAYLKERDILYPRHIIENFLTLIRTNDLIILAGDSGSGKTNLVQSFAKAIGGVSKIIPVKPNWTSSEDLLGYYNPLEKKYLA…	HHG97_004584	gb|HAH1170753.1|	MEAPFVIKFIETKWHDKQTLVSVSESEYSLKLEQTGNNAFSAHTTIYPKVDELRFAQLAIKTKQGDQSPPYIAMPNGERRQLESITDPASNEEWWVEPAHWDAKQRVWRSEARRTAGQIMFVIGSSTLKLDIDISEQTKSDLSRYLSDFKADLWELILDESSHITGDAKNSQVAAIDQEALSLVASILSNAQTILKKPKVELKEIQALKPAKEVRPVPRTFMEICTKGSRKHLTSRASEPSYNVPENQYVLYVVSSTLSIVKQLVKVAESKKSRFSGAIEKLNERLDSLKDYRIINRDLVVKDLERLKKRFDTEVINAELSEQLAKINVNLSRSYSEKGYLRLEKATGSENEWWAKIKPSQNDDWQQFEPDGYTIFSSRDHYASLFKSYSDYEIEAKIP…	Escherichia coli	Gammaproteobacteria
Gammaproteobacteria	Escherichia coli	DABKGA010000035.1	H1Y75_004397	gb|HAK1645610.1|	MALEQVIYNLEEVKGFSDEELYQRLCESWGITNGKLAVWGKILNGPDSDSRKLPTRLLEIKSLQTGLDTEYPINVRLTMDKGVFVSFKSVEELFGLEDGSFVSCELALAPQSEREKHENPFECNVVVSSVRRLIKLPEYTANDIIKGDENIFLDEAVYKQHLQNVQSRIDSEVTTLNAEFEREESSLKAQISSYKDQLQHVQDDLNQKNNVLSQAIAKAQKLEVEHSEWQHKIALQKKAEETMSKKIERLKAYVESKAGFLKSFEFLDDDDFDLFVGSTLSNKDRDEHISFSQAFDSNYSDAVSYIQAHLKERDILYPRHIIENFLTLIRTHDLIILAGDSGSGKTNLVQSFAKAIGGVSKIIPVKPNWTSSEDLLGYYNPLEKKYLVTPFLEALIEAK…	H1Y75_004396	gb|HAK1645609.1|	MEAPFVIKFIETKWHDKQTLVSVSESEYSLKLEQTGNNAFSAHTTIYPKVDELRFAQLAIKTKQGDQSPPYIVMPNGDRKQLESITDPASNAVWWVEPAHWDAKQRVWRSEARRTAGQITFVIGNSTLKLDIDISEQTKSDLSRYLSDFKADLWELILDENSHITGDAKNSQVAAIGQEALSLVASILSNAQTILKKPKVELKEIQALKPAKEVRPVPRTFMEICTKGSRKHLTSRASEPSYNVPENQYVLYVVSSTLSIVKQLVKVAESKKSRFSGAIEKLNERLDSLKDYRIINRDLVVKDLERLKKRFDTEVINAELSEQLAKINVNLSRSYSEKGYLRLEKATGSENEWWAKIKLSQNDDWQQFEPDGYTIFNSRDHYASLFKAYSDYEIEAKIP…	Escherichia coli	Gammaproteobacteria
Gammaproteobacteria	Escherichia coli	DABRNX010000077.1	IB180_004930	gb|HAM5759564.1|	SVRRLIKLPEYTANDIIKGDENIFLDEAVYKQHLQNVQSRIDSEVTALNAEFEREESSLKAQISSYKDQLQHVQDDLNQKNNVLSQAIAKAQKLEVEHSEWQHKIALQKKAEETMSKKIERLKAYVESKAGFLKSFEFLDDDDFDLFVGSTLSNKDRDEHISFSQAFDSNYSDAVSYIQAHLKERDILYPRHIIENFLTLIRTHDLIILAGDSGSGKTNLVQSFAKAIGGVSKIIPVKPNWTSSEDLLGYYNPLEKKYLVTPFLEALIEAKQNPDIPYFICLDEMNLARVEYYFADFLSKLEERNEQPTIQLYSDDEAAHVLAELKGVVSVISNAQEKFSKNGIVDFVALMQDEEINAEMKRAFGFSDKDSLIKYHGDIRRMLAGVLGTPSSITIPANV…	IB180_004931	gb|HAM5759565.1|	MEAPFVIKFIETKWHDKQTLVSVSESEYSLKLEQTGNNAFSAHTTIYPKVDELRFAQLAIKTKQGDQSPPYIVMPNGDRKQLESITDPASNAVWWVEPAHWDAKQRVWRSEARRTAGQITFVIGNSTLKLDIDISEQTKSDLSRYLSDFKADLWELILDENSHITGDAKNSQVAAIGQEALSLVASILSNAQTILKKPKVELKEIQALKPAKEVRPVPRTFMEICTKGSRKHLTSRASEPSYNVPENQYVLYVVSSTLSIVKQLVKVAESKKSRFSGAIEKLNERLDSLKDYRIINRDLVVKDLERLKKRFDTEVINAELSEQLAKINVNLSRSYSEKGYLRLEKATGSENEWWAKIKLSQNDDWQQFEPDGYTIFNSRDHYASLFKAYSDYEIEAKIP…	Escherichia coli	Gammaproteobacteria
Gammaproteobacteria	Escherichia coli	DABROY010000085.1	IB526_004186	gb|HAM5856574.1|	MALEQVIYNLEEVKGLSDEELYQRLYDSWGLENHKIDVWGELSINVAGNWAGIRNAKTLSGNQSIEYPLADSHELQSGVFLTPSVAKIVLGNDTKGMVACELMLASIPQRAKKNNPFLLAVNDKTVERLTYLPDALPNLDRQALIQNEDETLLRKVIYDAEVKRVKHKIASETEALEAALQEKQQDMTDKLAELSDAFKSTQDKITASTTELESSIKRNEELNNDNHRLNLKIQESKAELDVIIEKSRKVEESMARKVEKLTDFIKEKAIFLKSFEFLDEEDFDFFVGSPLSNKERGEHISFSQALYSNYSDAVSYIQAYLKERDILYPRHIIENFLTLIRTNDLIILAGDSGSGKTNLVQSFAKAIGGVSKIIPVKPNWTSSEDLLGYYNPLEKKYLA…	IB526_004187	gb|HAM5856575.1|	METPFVIKFIETKWHDKQTLVSVSESEYSLKLEQTGNNAFSAHTTIYPKVDELRFAQLAIKTKQGDQSPPYIVMPNGDRKQLESITDPASNAVWWVEPAHWDAKQRVWRSEARRTAGQITFVIGNSTLKLDIDISEQTKSDLSRYLSDFKADLWELILDENSHITGDAKNSQVAAIDQEALSLVASILSNAQTILKKPKVELKEIQALKPAKEVRPVPRTFMEICTKGSRKHLTSRASEPSYNVPENQYVLYVVLSTLSIVKQLVKVAESKKSRFSGAIEKLNERLDSLKDYRIINRDLVVKDLERLKKRFDTEVINAELASQLGEINANKYFSQNHAAKGYLRLEKTTGSENEWWAKIKPSQHDDWQQFELDGYTIFSSGEYYASLFQPYSDYDMVAI…	Escherichia coli	Gammaproteobacteria
Gammaproteobacteria	Vibrio vulnificus	DACQZG010000024.1	I7692_19315	gb|HAS8281889.1|	MILEPVIYDLEEVKGLSDEELYQRLCESWGITNGKLAVWGRIQNGPDSDSRKLPTRLLDIKSLQTGIDTEYPINVRLTMDKGVFVSFKSVEELFGLEDGSFVSCELALAPQSEREKHENPFECNVVVGSVRRLVKLPEYTANDIIKGDESIFLDDAVYKLHLQNVQSRIDSEVSALNAEFDREESSLKAQISSYQDQLQQTQDDLNQKNNVLSQAIAKAQKLEVELSEWQHKIALQKKAEETMSKKIERLKAYVESKAGFLKSFEFLDDEDFDFFVGNPSASELQGEHISFSQAFDSNYSDAVSYIQAHLKERDILYPRHIIENFLTLIRTNDLIILAGDSGSGKTNLVQSFAKAIGGVSKIIPVKPNWTSSEDLLGYYNPLEKKYLATPFLEALIEAK…	I7692_19310	gb|HAS8281888.1|	MQAPFVIKFIEAKWHDKQTLVSISESEYSLKLEHVGNNAFSAHTTIYPKVDELRFAQLAIKTKQGDQSSPYIAMPNGDRRQLESITDPASNEVWWVEPAHWDAKQRVWRSEARRTAGQITFVIGRSTLKLDIDISEQTKSDLSRYLSDFKADLWELILDENSHITGDAKNSQVAAIDQEALSLVASILTNAQTILKKPKVELKEVQALKPAKEVRPVPRTFMEICAKGSRKHLTSRASEPSYNVPENQYVLYVVSSTLSIVKQLVRVAESKTNRFSGAVEKLNERLGSLKDYRSINRDLVVKDLERLKKRFDTEAINDDLADKLAEINANKYFSRNHAAKGYLRLEKTTGSENEWWAKIKPSLHDDWQQFELNGYTIFSPGEHYASLFKPYSDYEMEAI…	Vibrio vulnificus	Gammaproteobacteria
Gammaproteobacteria	Citrobacter freundii	DACSXM010000030.1	I9Y35_004933	gb|HAT3935939.1|	MALEQVIYNLEEVKGFSDEELYQCLCESWGITNGKLAVWGKILNGPDSDSRKLPTRLLEIKSLQTGLDTEYPINVRLTMDKGVFVSFKSVEELFGLEDGSFVSCELALAPQSEREKHENPFECNVVVSSVRRLIKLPEYTANDIIKGDENIFLDEAVYKQHLQNVQSRIDSEVTALNAEFEREESSLKAQISSYKDQLQHVQDDLNQKNNVLSQAIAKAQKLEVEHSEWQHKIALQKKAEETMSKKIERLKAYVESKAGFLKSFEFLDDDDFDLFVGSTLSNKDRDEHISFSQAFDSNYSDAVSYIQAHLKERDILYPRHIIENFLTLIRTHDLIILAGDSGSGKTNLVQSFAKAIGGVSKIIPVKPNWTSSEDLLGYYNPLEKKYLVTPFLEALIEAK…	I9Y35_004934	gb|HAT3935940.1|	MEAPFVIKFIETKWHDKQTLVSVSESEYSLKLEQTGNNAFSAHTTIYPKVDELRFAQLAIKTKQGDQSPPYIVMPNGDRKQLESITDPASNAVWWVEPAHWDAKQRVWRSEARRTAGQITFVIGNSTLKLDIDISEQTKSDLSRYLSDFKADLWELILDENSHITGDAKNSQVAAIGQEALSLVASILSNAQTILKKPKVELKEIQALKPAKEVRPVPRTFMEICTKGSRKHLTSRASEPSYNVPENQYVLYVVSSTLSIVKQLVKVAESKKSRFSGAIEKLNERLDSLKDYRIINRDLVVKDLERLKKRFDTEVINAELSEQLAKINVNLSRSYSEKGYLRLEKATGSENEWWAKIKLSQNDDWQQFEPDGYTIFNSRDHYASLFKAYSDYEIEAKIP…	Citrobacter freundii	Gammaproteobacteria
Gammaproteobacteria	Enterobacter cloacae subsp. cloacae	DACUIG010000071.1	JAX36_004750	gb|HAT7688411.1|	MALEQVIYNLEEVKGFSDEELYQRLCESWGITNGKLAVWGKILNGPDSDSRKLPTRLLEIKSLQTGLDTEYPINVRLTMDKGVFVSFKSVEELFGLEDGSFVSCELALAPQSEREKHENPFECNVVVSSVRRLIKLPEYTANDIIKGDENIFLDEAVYKQHLQNVQSRIDSEVTALNAEFEREESSLKAQISSYKDQLQHVQDDLNQKNNVLSQAIAKAQKLEVEHSEWQHKIALQKKAEETMSKKIERLKAYVESKAGFLKSFEFLDDDDFDLFVGSTLSNKDRDEHISFSQAFDSNYSDAVSYIQAHLKERDILYPRHIIENFLTLIRTHDLIILAGDSGSGKTNLVQSFAKAIGGVSKIIPVKPNWTSSEDLLGYYNPLEKKYLVTPFLEALIEAK…	JAX36_004749	gb|HAT7688410.1|	MEAPFVIKFIETKWHDKQTLVSVSESEYSLKLEQTGNNAFSAHTTIYPKVDELRFAQLAIKTKQGDQSPPYIVMPNGDRKQLESITDPASNAVWWVEPAHWDAKQRVWRSEARRTAGQITFVIGNSTLKLDIDISEQTKSDLSRYLSDFKADLWELILDENSHITGDAKNSQVAAIGQEALSLVASILSNAQTILKKPKVELKEIQALKPAKEVRPVPRTFMEICTKGSRKHLTSRASEPSYNVPENQYVLYVVSSTLSIVKQLVKVAESKKSRFSGAIEKLNERLDSLKDYRIINRDLVVKDLERLKKRFDTEVINAELSEQLAKINVNLSRSYSEKGYLRLEKATGSENEWWAKIKLSQNDDWQQFEPDGYTIFNSRDHYASLFKAYSDYEIEAKIP…	Enterobacter cloacae subsp. cloacae	Gammaproteobacteria
Gammaproteobacteria	Citrobacter freundii	DACXHW010000093.1	F6V26_19900	gb|HAU4326566.1|	MALEQVIYNLEEVKGFSDEELYQRLCESWGITNGKLAVWGKILNGPDSDSRKLPTRLLEIKSLQTGLDTEYPINVRLTMDKGVFVSFKSVEELFGLEDGSFVSCELALAPQSEREKHENPFECNVVVSSVRRLIKLPEYTANDIIKGDENIFLDEAVYKQHLQNVQSRIDSEVTALNAEFEREESSLKAQISSYKDQLQHVQDDLNQKNNVLSQAIAKAQKLEVEHSEWQHKIALQKKAEETMSKKIERLKAYVESKAGFLKSFEFLDDDDFDLFVGSTLSNKDRDEHISFSQAFDSNYSDAVSYIQAHLKERDILYPRHIIENFLTLIRTHDLIILAGDSGSGKTNLVQSFAKAIGGVSKIIPVKPNWTSSEDLLGYYNPLEKKYLVTPFLEALIEAK…	F6V26_19895	gb|HAU4326565.1|	MEAPFVIKFIETKWHDKQTLVSVSESEYSLKLEQTGNNAFSAHTTIYPKVDELRFAQLAIKTKQGDQSPPYIVMPNGDRKQLESITDPASNAVWWVEPAHWDAKQRVWRSEARRTAGQITFVIGNSTLKLDIDISEQTKSDLSRYLSDFKADLWELILDENSHITGDAKNSQVAAIGQEALSLVASILSNAQTILKKPKVELKEIQALKPAKEVRPVPRTFMEICTKGSRKHLTSRASEPSYNVPENQYVLYVVSSTLSIVKQLVKVAESKKSRFSGAIEKLNERLDSLKDYRIINRDLVVKDLERLKKRFDTEVINAELSEQLAKINVNLSRSYSEKGYLRLEKATGSENEWWAKIKLSQNDDWQQFEPDGYTIFNSRDHYASLFKAYSDYEIEAKIP…	Citrobacter freundii	Gammaproteobacteria
Gammaproteobacteria	Citrobacter freundii	DACXTX010000077.1	JD343_25520	gb|HAU5711452.1|	MALEQVIYNLEEVKGLSDEELYQRLYDSWGLENHKIDVWGELSINVAGNWAGIRNAKTLSGNQSIEYPLADSHELQSGVFLTPSVAKIVLGNDTKGMVACELMLASIPQRAKKNNPFLLAVNDKTVERLTYLPDALPNLDRQALIQNEDETLLRKVIYDAEVKRVKHKIASETEALEAALQEKQQDMTDKLAELSDAFKSTQDKITASTTELESSIKRNEELNNDNHRLNLKIQESKAELDVIIEKSRKVEESMARKVEKLTDFIKEKAIFLKSFEFLDEEDFDFFVGSPLSNKERGEHISFSQALYSNYSDAVSYIQAYLKERDILYPRHIIENFLTLIRTNDLIILAGDSGSGKTNLVQSFAKAIGGVSKIIPVKPNWTSSEDLLGYYNPLEKKYLA…	JD343_25525	gb|HAU5711453.1|	METPFVIKFIETKWHDKQTLVSVSESEYSLKLEQTGNNAFSAHTTIYPKVDELRFAQLAIKTKQGDQSPPYIVMPNGDRKQLESITDPASNAVWWVEPAHWDAKQRVWRSEARRTAGQITFVIGNSTLKLDIDISEQTKSDLSRYLSDFKADLWELILDENSHITGDAKNSQVAAIDQEALSLVASILSNAQTILKKPKVELKEIQALKPAKEVRPVPRTFMEICTKGSRKHLTSRASEPSYNVPENQYVLYVVLSTLSIVKQLVKVAESKKSRFSGAIEKLNERLDSLKDYRIINRDLVVKDLERLKKRFDTEVINAELASQLGEINANKYFSQNHAAKGYLRLEKTTGSENEWWAKIKPSQHDDWQQFELDGYTIFSSGEYYASLFQPYSDYDMVAI…	Citrobacter freundii	Gammaproteobacteria
Gammaproteobacteria	Citrobacter freundii	DACYAG010000034.1	JD850_26825	gb|HAU6403657.1|	MALEQVIYNLEEVKGFSDEELYQRLCESWGITNGKLAVWGKILNGPDSDSRKLPTRLLEIKSLQTGLDTEYPINVRLTMDKGVFVSFKSVEELFGLEDGSFVSCELALAPQSEREKHENPFECNVVVSSVRRLIKLPEYTANDIIKGDENIFLDEAVYKQHLQNVQSRIDSEVTALNAEFEREESSLKAQISSYKDQLQHVQDDLNQKNNVLSQAIAKAQKLEVEHSEWQHKIALQKKAEETMSKKIERLKAYVESKAGFLKSFEFLDDDDFDLFVGSTLSNKDRDEHISFSQAFDSNYSDAVSYIQAHLKERDILYPRHIIENFLTLIRTHDLIILAGDSGSGKTNLVQSFAKAIGGVSKIIPVKPNWTSSEDLLGYYNPLEKKYLVTPFLEALIEAK…	JD850_26820	gb|HAU6403656.1|	MMEAPFVIKFIETKWHDKQTLVSVSESEYSLKLEQTGNNAFSAHTTIYPKVDELRFAQLAIKTKQGDQSPPYIVMPNGDRKQLESITDPASNAVWWVEPAHWDAKQRVWRSEARRTAGQITFVIGNSTLKLDIDISEQTKSDLSRYLSDFKADLWELILDENSHITGDAKNSQVAAIGQEALSLVASILSNAQTILKKPKVELKEIQALKPAKEVRPVPRTFMEICTKGSRKHLTSRASEPSYNVPENQYVLYVVSSTLSIVKQLVKVAESKKSRFSGAIEKLNERLDSLKDYRIINRDLVVKDLERLKKRFDTEVINAELSEQLAKINVNLSRSYSEKGYLRLEKATGSENEWWAKIKLSQNDDWQQFEPDGYTIFNSRDHYASLFKAYSDYEIEAKI…	Citrobacter freundii	Gammaproteobacteria
Gammaproteobacteria	Raoultella ornithinolytica	DACZXY010000036.1	JHK42_003934	gb|HAV2258818.1|	MSNKVYGYSELEGLSDTELLATLQSSWGYEDDNFEVWGEVTLFKDREWGHLKNPRMLASNNLLSYPLTGVNGPCEFWINPADAKKYGDQRGARFIKCKLTLSRPKEREKHRIPFMMSVLPGSCSSLEKLPASVPHDIVTADDVSYFIANEIYHFYQQQAATRIEQEFATKQSMLDQQLAEALAEKQSAELKRDNAIKLVESLNSMRKKTEQSIALLETDNELKQKQLQITLENFKKIEVEMNHKILRLKKYVSDKALFLKTFEFLDQEDLDNFLVESKSASQEVDGVVFREQLNGDYSQAISYIQSHLIQKDILYPRHIIENYLTLLRTKDLIILAGESGSGKTNLVKSFAKAVGGKAVIIPVKPNWTSSEDLLGYYNPLEKKYLATPFLDALLEAQLN…	JHK42_003935	gb|HAV2258819.1|	MTSTFEIKYIEIQWYDKDTVTKVTESLHVIPVEYNDEHSHFECETTIYPRTEGILRGQLAVRFIAGPAVIPCIKMSDGAEQQLFPVEDIDSGKTWWIVQDSWDAKEKYWRHSSVNTAGTLILVLDDVHCHINIGSMDFSREQLERYLTGFKDDLWELILDESSSVQASREQGSIGINNATIDCAQNIIMHAHKILGNPKAELREIQTLKPRKAVKPVNRTFMELATKTNQSVLTSRAVTPTFNMAENRYILFALERSYRIIKQIVILSGNKAKRYAALTDKLQQQYDSFTDSVTIDRDLVVKDLEIIRQRCKLSYWQQQLAQSIFAEKIVYDADGPQYNVLYFRSQKPTQENDGFFIEINVQGQWKKDNEKSTVLSFNSKVNASLLNLVRCLRQHAEYK…	Raoultella ornithinolytica	Gammaproteobacteria
Gammaproteobacteria	Escherichia coli	DADDHX010000065.1	JLO07_004273	gb|HAW1988024.1|	MALEQVIYNLEEVKGLSDEELYQRLYDSWGLENHKIDVWGELSINVAGNWAGIRNAKTLSGNQSIEYPLADSHELQSGVFLTPSVAKIVLGNDTKGMVACELMLASIPQRAKKNNPFLLAVNDKTVERLTYLPDALPNLDRQALIQNEDETLLRKVIYDAEVKRVKHKIASETEALEAALQEKQQDMTDKLAELSDAFKSTQDKITASTTELESSIKRNEELNNDNHRLNLKIQESKAELDVIIEKSRKVEESMARKVEKLTDFIKEKAIFLKSFEFLDEEDFDFFVGSPLSNKERGEHISFSQALYSNYSDAVSYIQAYLKERDILYPRHIIENFLTLIRTNDLIILAGDSGSGKTNLVQSFAKAIGGVSKIIPVKPNWTSSEDLLGYYNPLEKKYLA…	JLO07_004274	gb|HAW1988025.1|	METPFVIKFIETKWHDKQTLVSVSESEYSLKLEQTGNNAFSAHTTIYPKVDELRFAQLAIKTKQGDQSPPYIVMPNGDRKQLESITDPASNAVWWVEPAHWDAKQLVWRSEARRTAGQITFVIGNSTLKLDIDISEQTKSDLSRYLSDFKADLWELILDENSHITGDAKNSQVAAIDQEALSLVASILSNAQTILKKPKVELKEIQALKPAKEVRPVPRTFMEICTKGSRKHLTSRASEPSYNVPENQYVLYVVLSTLSIVKQLVKVAESKKSRFSGAIEKLNERLDSLKDYRIINRDLVVKDLERLKKRFDTEVINAELASQLGEINANKYFSQNHAAKGYLRLEKTTGSENEWWAKIKPSQHDDWQQFELDGYTIFSSGEYYASLFQPYSDYDMVAI…	Escherichia coli	Gammaproteobacteria
Gammaproteobacteria	Escherichia coli	DADDJI010000028.1	JLO84_004412	gb|HAW2165506.1|	MALEQVIYNLEEVKGLSDEELYQRLYDSWGLENHKIDVWGELSINVARNWAGIRNAKTLSGNQSIEYPLADSHELQSGVFLTPSVAKIVLGNDTKGMVACELMLASIPQRAKKNNPFLLAVNDKTVERLTYLPDALPNLDRQALIQNEDETLLRKVIYDAEVKRVKHKIASETEALEAALQEKQQDMTDKLAELSDAFKSTQDKITASTTELESSIKRNEELNNDNHRLNLKIQESKAELDVIIEKSRKVEESMARKVEKLTDFIKEKAIFLKSFEFLDEEDFDFFVGSPLSNKERGEHISFSQALYSNYSDAVSYIQAYLKERGILYPRHIIENFLTLIRTNDLIILAGDSGSGKTNLVQSFAKAIGGVSKIIPVKPNWTSSEDLLGYYNPLEKKYLA…	JLO84_004413	gb|HAW2165507.1|	METPFVIKFIETKWHDKQTLVSVSESEYSLKLEQTGNNAFSAHTTIYPKVDELRFAQLAIKTKQGDQSPPYIVMPNGDRKQLESITDPASNAVWWVEPAHWDAKQRVWRSEARRTAGQITFVIGNSTLKLDIDISEQTKSDLSRYLSDFKADLWELILDENSHITGDAKNSQVAAIDQEALSLVASILSNAQTILKKPKVELKEIQALKPAKEVRPVPRTFMEICTKGSRKHLTSRASEPSYNVPENQYVLYVVLSTLSIVKQLVKVAESKKSRFSGAIEKLNERLDSLKDYRIINRDLVVKDLERLKKRFDTEVINAELASQLGEINANKYFSQNHAAKGYLRLEKTTGSENEWWAKIKPSQHDDWQQFELDGYTIFSSGEYYASLFQPYSDYDMVAI…	Escherichia coli	Gammaproteobacteria
Gammaproteobacteria	Escherichia coli	DADDQV010000068.1	JLR62_003908	gb|HAW3070908.1|	MALEQVIYNLEEVKGLSDEELYQRLYDSWGLENHKIDVWGELSINVAGNWAGIRNAKTLSGNQSIEYPLADSHELQSGVFLTPSVAKIVLGNDTKGMVACELMLASIPQRAKKNNPFLLAVNDKTVERLTYLPDALPNLDRQALIQNEDETLLRKVIYDAEVKRVKHKIASETEALEAALQEKQQDMTDKLAELSDAFKSTQDKITASTTELESSIKRNEELNNDNHRLNLKIQESKAELDVIIEKSRKVEESMARKVEKLTDFIKEKAIFLKSFEFLDEEDFDFFVGSPLSNKERGEHISFSQALYSNYSDAVSYIQAYLKERDILYPRHIIENFLTLIRTNDLIILAGDSGSGKTNLVQSFAKAIGGVSKIIPVKPNWTSSEDLLGYYNPLEKKYLA…	JLR62_003909	gb|HAW3070909.1|	METPFVIKFIETKWHDKQTLVSVSESEYSLKLEQTGNNAFSAHTTIYPKVDELRFAQLAIKTKQGDQSPPYIVMPNGDRKQLESITDPASNAVWWVEPAHWDAKQLVWRSEARRTAGQITFVIGNSTLKLDIDISEQTKSDLSRYLSDFKADLWELILDENSHITGDAKNSQVAAIDQEALSLVASILSNAQTILKKPKVELKEIQALKPAKEVRPVPRTFMEICTKGSRKHLTSRASEPSYNVPENQYVLYVVLSTLSIVKQLVKVAESKKSRFSGAIEKLNERLDSLKDYRIINRDLVVKDLERLKKRFDTEVINAELASQLGEINANKYFSQNHAAKGYLRLEKTTGSENEWWAKIKPSQHDDWQQFELDGYTIFSSGEYYASLFQPYSDYDMVAI…	Escherichia coli	Gammaproteobacteria
Gammaproteobacteria	Escherichia coli	DADIAT010000073.1	JTO97_004833	gb|HAX6730021.1|	MALEQVIYNLEEVKGLSDEELYQRLYDSWGLENHKIDVWGELSINVARNWAGIRNAKTLSGNQSIEYPLADSHELQSGVFLTPSVAKIVLGNDTKGMVACELMLASIPQRAKKNNPFLLAVNDKTVERLTYLPDALPNLDRQALIQNEDETLLRKVIYDAEVKRVKHKIASETEALEAALQEKQQDMTDKLAELSDAFKSTQDKITASTTELESSIKRNEELNNDNHRLNLKIQESKAELDVIIEKSRKVEESMARKVEKLTDFIKEKAIFLKSFEFLDEEDFDFFVGSPLSNKERGEHISFSQALYSNYSDAVSYIQAYLKERGILYPRHIIENFLTLIRTNDLIILAGDSGSGKTNLVQSFAKAIGGVSKIIPVKPNWTSSEDLLGYYNPLEKKYLA…	JTO97_004834	gb|HAX6730022.1|	METPFVIKFIETKWHDKQTLVSVSESEYSLKLEQTGNNAFSAHTTIYPKVDELRFAQLAIKTKQGDQSPPYIVMPNGDRKQLESITDPASNAVWWVEPAHWDAKQRVWRSEARRTAGQITFVIGNSTLKLDIDISEQTKSDLSRYLSDFKADLWELILDENSHITGDAKNSQVAAIDQEALSLVASILSNAQTILKKPKVELKEIQALKPAKEVRPVPRTFMEICTKGSRKHLTSRASEPSYNVPENQYVLYVVLSTLSIVKQLVKVAESKKSRFSGAIEKLNERLDSLKDYRIINRDLVVKDLERLKKRFDTEVINAELASQLGEINANKYFSQNHAAKGYLRLEKTTGSENEWWAKIKPSQHDDWQQFELDGYTIFSSGEYYASLFQPYSDYDMVAI…	Escherichia coli	Gammaproteobacteria
Gammaproteobacteria	Escherichia coli	DADRSP010000079.1	J5G75_004407	gb|HBA3747666.1|	MALEQVIYNLEEVKGFSDEELYQRLCESWGITNGKLAVWGKILNGPDSDSRKLPTRLLEIKSLQTGLDTEYPINVRLTMDKGVFVSFKSVEELFGLEDGSFVSCELALAPQSEREKHENPFECNVVVSSVRRLIKLPEYTANDIIKGDENIFLDEAVYKQHLQNVQSRIDSEVTALNAEFEREESSLKAQISSYKDQLQHVQDDLNQKNNVLSQAIAKAQKLEVEHSEWQHKIALQKKAEETMSKKIERLKAYVESKAGFLKSFEFLDDDDFDLFVGSTLSNKDRDEHISFSQAFDSNYSDAVSYIQAHLKERDILYPRHIIENFLTLIRTHDLIILAGDSGSGKTNLVQSFAKAIGGVSKIIPVKPNWTSSEDLLGYYNPLEKKYLVTPFLEALIEAK…	J5G75_004408	gb|HBA3747667.1|	MEAPFVIKFIETKWHDKQTLVSVSESEYSLKLEQTGNNAFSAHTTIYPKVDELRFAQLAIKTKQGDQSPPYIVMPNGDRKQLESITDPASNAVWWVEPAHWDAKQRVWRSEARRTAGQITFVIGNSTLKLDIDISEQTKSDLSRYLSDFKADLWELILDENSHITGDAKNSQVAAIGQEALSLVASILSNAQTILKKPKVELKEIQALKPAKEVRPVPRTFMEICTKGSRKHLTSRASEPSYNVPENQYVLYVVSSTLSIVKQLVKVAESKKSRFSGAIEKLNERLDSLKDYRIINRDLVVKDLERLKKRFDTEVINAELSEQLAKINVNLSRSYSEKGYLRLEKATGSENEWWAKIKLSQNDDWQQFEPDGYTIFNSRDHYASLFKAYSDYEIEAKIP…	Escherichia coli	Gammaproteobacteria
Gammaproteobacteria	Escherichia coli	DADRUT010000166.1	J5G10_004615	gb|HBA4002839.1|	VKGLSDEELYQRLYDSWGLENHKIDVWGELSINVAGNWAGIRNAKTLSGNQSIEYPLADSHELQSGVFLTPSVAKIVLGNDTKGMVACELMLASIPQRAKKNNPFLLAVNDKTVERLTYLPDALPNLDRQALIQNEDETLLRKVIYDAEVKRVKHKIASETEALEAALQEKQQDMTDKLAELSDAFKSTQDKITASTTELESSIKRNEELNNDNHRLNLKIQESKAELDVIIEKSRKVEESMARKVEKLTDFIKEKAIFLKSFEFLDEEDFDFFVGSPLSNKERGEHISFSQALYSNYSDAVSYIQAYLKERDILYPRHIIENFLTLIRTNDLIILAGDSGSGKTNLVQSFAKAIGGVSKIIPVKPNWTSSEDLLGYYNPLEKKYLATPFLEALIEAKQ…	J5G10_004616	gb|HBA4002840.1|	METPFVIKFIETKWHDKQTLVSVSESEYSLKLEQTGNNAFSAHTTIYPKVDELRFAQLAIKTKQGDQSPPYIVMPNGDRKQLESITDPASNAVWWVEPAHWDAKQRVWRSEARRTAGQITFVIGNSTLKLDIDISEQTKSDLSRYLSDFKADLWELILDENSHITGDAKNSQVAAIDQEALSLVASILSNAQTILKKPKVELKEIQALKPAKEVRPVPRTFMEICTKGSRKHLTSRASEPSYNVPENQYVLYVVLSTLSIVKQLVKVAESKKSRFSGAIEKLNERLDSLKDYRIINRDLVVKDLERLKKRFDTEVINAELASQLGEINANKYFSQNHAAKGYLRLEKTTGSENEWWAKIKPSQHDDWQQFELDGYTIFSSGEYYASLFQPYSDYDMVAI…	Escherichia coli	Gammaproteobacteria
Gammaproteobacteria	Vibrio parahaemolyticus	DADWXL010000009.1	JG860_002310	gb|HBB9944534.1|	MALEQVIYDLEEVKGLSDEELYQRLYDSWGLENHKIDVWGELSINEAGNWAGIRNAKTLHDNQSIEYPLADSYELQSGVFLNPSVAKIVLGNDTKGMVACELMLASIPQRAKKNNPFLLAVNDKTVERLTYLPDALPNLDRQALIQNEDETLLRKVIYDAEVNRVKHKIASETEALEAALQEKQQDMTDKLAELSDAFKSTQDKITKSTSELKSSIKRNEELNNDNHRLNLKIQESKAELDVIIEKSRRVEESMARKVEKLTDFIKEKAIFLKNFEFLDEEDFDFFVGSSLSNKDRGEHISFSQNYSDAVSYIQAHLKERDILYPRHIIENFLTLIRTNDLIILAGDSGSGKTNLVQSFAKAIGGVSKIIPVKPNWTSSEDLLGYYNPLEKKYLATPFL…	JG860_002311	gb|HBB9944535.1|	MPNGDRKQLESITDPASNAVWWVEPAHWDAKQRVWRSEARRTAGQITFVIGNSTLKLDIDISEQTKSDLSRYLSDFKADLWELILDENSHITGDAKNSQVAAIDQEALSLVASILSNAQTILKKPKVELKEIQALKPAKEVRPVPRTFMEICTKGSRKHLTSRASEPSYNVPENQYVLYVVSSTLSIVKQLVRVAESKTNRFSGAVEKLNERLSELKGYKKVNRDLLVKDLERLKRLYDVDYINEELSKSLALVNTTNKIPSLQTNNGYIRLEGTTKERDGWFIQLKYSADGTWQALEDGKFTILKPSLPYFRLFQKESEYEIRANLPLSDSSPRASILTTSYIAQMKICKDSIAIQKARDSFRDQKEKGVNLSKNDWKAELTKEELTEQEKERTTIRK…	Vibrio parahaemolyticus	Gammaproteobacteria
Gammaproteobacteria	Escherichia coli	DAEBAR010000112.1	KH773_003279	gb|HBD1662790.1|	MALEQVIYNLEEVKGLSDEELYQRLYDSWGLENHKIDVWGELSINVAGNWAGIRNAKTLSGNQSIEYPLADSHELQSGVFLTPSVAKIVLGNDTKGMVACELMLASIPQRAKKNNPFLLAVNDKTVERLTYLPDALPNLDRQALIQNEDETLLRKVIYDAEVKRVKHKIASETEALEAALQEKQQDMTDKLAELSDAFKSTQDKITASTTELESSIKRNEELNNDNHRLNLKIQESKAELDVIIEKSRKVEESMARKVEKLTDFIKEKAIFLKSFEFLDEEDFDFFVGSPLSNKERGEHISFSQALYSNYSDAVSYIQAYLKERDILYPRHIIENFLTLIRTNDLIILAGDSGSGKTNLVQSFAKAIGGVSKIIPVKPNWTSSEDLLGYYNPLEKKYLA…	KH773_003280	gb|HBD1662791.1|	METPFVIKFIETKWHDKQTLVSVSESEYSLKLEQTGNNAFSAHTTIYPKVDELRFAQLAIKTKQGDQSPPYIVMPNGDRKQLESITDPASNAVWWVEPAHWDAKQRVWRSEARRTAGQITFVIGNSTLKLDIDISEQTKSDLSRYLSDFKADLWELILDENSHITGDAKNSQVAAIDQEALSLVASILSNAQTILKKPKVELKEIQALKPAKEVRPVPRTFMEICTKGSRKHLTSRASEPSYNVPENQYVLYVVLSTLSIVKQLVKVAESKKSRFSGAIEKLNERLDSLKDYRIINRDLVVKDLERLKKRFDTEVINAELASQLGEINANKYFSQNHAAKGYLRLEKTTGSENEWWAKIKPSQHDDWQQFELDGYTIFSSGEYYASLFQPYSDYDMVAI…	Escherichia coli	Gammaproteobacteria
Gammaproteobacteria	Shigella flexneri	DAECML010000124.1	KKN67_003122	gb|HBD6218255.1|	MALEQVIYNLEEVKGLSDEELYQRLYDSWGLENHKIDVWGELSINVAGNWAGIRNAKTLSGNQSIEYPLADSHELQSGVFLTPSVAKIVLGNDTKGMVACELMLASIPQRAKKNNPFLLAVNDKTVERLTYLPDALPNLDRQALIQNEDETLLRKVIYDAEVKRVKHKIASETEALEAALQEKQQDMTDKLAELSDAFKSTQDKITASTTELESSIKRNEELNNDNHRLNLKIQESKAELDVIIEKSRKVEESMARKVEKLTDFIKEKAIFLKSFEFLDEEDFDFFVGSPLSNKERGEHISFSQALYSNYSDAVSYIQAYLKERDILYPRHIIENFLTLIRTNDLIILAGDSGSGKTNLVQSFAKAIGGVSKIIPVKPNWTSSEDLLGYYNPLEKKYLA…	KKN67_003123	gb|HBD6218256.1|	METPFVIKFIETKWHDKQTLVSVSESEYSLKLEQTGNNAFSAHTTIYPKVDELRFAQLAIKTKQGDQSPPYIVMPNGDRKQLESITDPASNAVWWVEPAHWDAKQRVWRSEARRTAGQITFVIGNSTLKLDIDISEQTKSDLSRYLSDFKADLWELILDENSHITGDAKNSQVAAIDQEALSLVASILSNAQTILKKPKVELKEIQALKPAKEVRPVPRTFMEICTKGSRKHLTSRASEPSYNVPENQYVLYVVLSTLSIVKQLVKVAESKKSRFSGAIEKLNERLDSLKDYRIINRDLVVKDLERLKKRFDTEVINAELASQLGEINANKYFSQNHAAKGYLRLEKTTGSENEWWAKIKPSQHDDWQQFELDGYTIFSSGEYYASLFQPYSDYDMVAI…	Shigella flexneri	Gammaproteobacteria
Bacillota	Bacillus sp. (in: firmicutes)	DPDY01000666.1	DEU03_23875	gb|HCF56103.1|	MLHEEKEMIAITENSLKDSEMKTIINQTQLHNKEPKRYDEWLSTEAAQVVTELRTADENNELSALHVNKFVKLFKKYSQGRLLFHINGYIQTEETVRIYGTPMEWTNEGIVPLNHPWKIEEWSISRNNIKAHRVAHLKQNDLVLVNFSGTQNTHFLASLLFIDFTTAEVVPLSLEQSLQEIGGTAFVKQLKDNMSVNTSEEIEAIIIQRLLNVNQELKNQLEKEQQEFVLQQQKLSEEQQMWRRIFYKIEQAIAFEQKEAKVDEVQIHPYKEETFCKQVQSLLYHNDEEQLIYQESTLKSFIHALQANVLTILTGPSGTGKSSIVQAFGHAVQNVAVRMIPVQSSWTDTQDLIGYFHPTDKTFVPTPFMEALAEASKNSNKLFLICLDEMNLAHVEYYF…	DEU03_23870	gb|HCF56102.1|	MKIIHIVLKDREIQAYDELTKSEGIFLASEYTKKDKMTAQIGVIEPAASKVLIEQFKQPVATLTKDNKTNIWYHKPSKWLADGFEQSTDSIFGINAGGSFDIVAYDVDNLELARAQVNITPGTISIKEYAFMQQEVRRLFELFSYDLARESIDNKNILKQTQTKLFNVYKLEEILNEFSDWFLQLVQEPAEQLIHTTKKVALIQLKKWTPKVILEQTLRPDHKVRANVIEKSTAIAEHGMLRLMLEQIKQRIDCESQAEEILINELTDEIVQLSQVIKDKTNHLQEAILALQQVVKQDLITLKARKSIWFQLNSDVQKWLDEPLMDVSPVEIEETHVFSMNPVYSAVYDSYLKFNELQPKLFEAIRPFIQSILKSPTLYEIWIFLKITQQLHQWGVNTD…	Bacillus sp. (in: firmicutes)	Bacillota
Bacillota	Bacillota bacterium	DURB01000006.1	GX008_01050	gb|HHT72286.1|	MLSPEYELSEDYVQYWWIIPLLTESQEHALVGRVESVSSKRCIIRCEIPGLPTSLGEPATLFLASHKALAEAGAVKKDDLVRFHWVNPGTAKRDRNGTAYAIAKNVRQITEDAFEERRKNLLDYLQAELIKRLHHELSKAEASIDEEVSSRTQSKLAEAEAKLEQAVKLKELAEQQLGQAVAKDIQLEQERRSLADTWRELEGKGKVLEAKANELAAEKAKLESLYENHIKHIEYLFPKEVKAGRTARASMNLVEIREQWVKAIESAGLRLPEDICLSFLVSTLTACLSGSLVLLSGPVGTGKTSTIRTAAQLLDGGVEVVPVRPGWLDSSDLLGFYDPLRNIYSPSPFVNGLIEAKNYSDRLFFLALDELNLARIEDYGADLLSVLEYSKGDGEGQRT…	GX008_01055	gb|HHT72287.1|	MYPKITFRDENGPLPEIDGLPHIRQFQGEWWVQLSTPWEGKVALKKRDGQLLELTSTDKQNWFIPKDRPKKRRIRDAVKTPAGTVLVKLTDEHGRELHGQGTAAKLEVLTANIGDEELEKMLRDIGLLALSTSTYLYGNLAGPVPDQLGEGQIGGIPQGMRGYFRSAESLLRLGRALQQNWAVITKRPLREIKVGTGINRDYYQVRSPQMLVKAYVRGPHTPQLGLRRLSGSDCSENQFLCHLLDHYLILVAEGTAALLQSSQGELVDESVLDELASIANFEGFTRQARARLSKANQVTAELNKTIAATLQELQQTIEWAKKARRTSFLKDVSTPRVLPEITQRLLGTPGYAAVVREFFNSRKASLDGIQHVLSLFTELWQGNVKATWELYEIWCLVRL…	Bacillota bacterium	Bacillota
Gammaproteobacteria	Enterobacter hormaechei	SHNZ01000075.1	EYC94_25475	gb|KAA0876705.1|	MALEQVIYNLEEVKGFSDEELYQRLCESWGITNGKLAVWGKILNGPDSDSRKLPTRLLEIKSLQTGLDTEYPINVRLTMDKGVFVSFKSVEELFGLEDGSFVSCELALAPQSEREKHENPFECNVVVSSVRRLIKLPEYTANDIIKGDENIFLDEAVYKQHLQNVQSRIDSEVTALNAEFEREESSLKAQISSYKDQLQHVQDDLNQKNNVLSQAIAKAQKLEVEHSEWQHKIALQKKAEETMSKKIERLKAYVESKAGFLKSFEFLDDDDFDLFVGSTLSNKDRDEHISFSQAFDSNYSDAVSYIQAHLKERDILYPRHIIENFLTLIRTHDLIILAGDSGSGKTNLVQSFAKAIGGVSKIIPVKPNWTSSEDLLGYYNPLEKKYLVTPFLEALIEAK…	EYC94_25480	gb|KAA0876706.1|	MEAPFVIKFIETKWHDKQTLVSVSESEYSLKLEQTGNNAFSAHTTIYPKVDELRFAQLAIKTKQGDQSPPYIVMPNGDRKQLESITDPASNAVWWVEPAHWDAKQRVWRSEARRTAGQITFVIGNSTLKLDIDISEQTKSDLSRYLSDFKADLWELILDENSHITGDAKNSQVAAIGQEALSLVASILSNAQTILKKPKVELKEIQALKPAKEVRPVPRTFMEICTKGSRKHLTSRASEPSYNVPENQYVLYVVSSTLSIVKQLVKVAESKKSRFSGAIEKLNERLDSLKDYRIINRDLVVKDLERLKKRFDTEVINAELSEQLAKINVNLSRSYSEKGYLRLEKATGSENEWWAKIKLSQNDDWQQFEPDGYTIFNSRDHYASLFKAYSDYEIEAKIP…	Enterobacter hormaechei	Gammaproteobacteria
Gammaproteobacteria	Klebsiella pneumoniae subsp. pneumoniae	VWRO01000004.1	F1632_26485	gb|KAA6129399.1|	MALEQVIYNLEEVKGLSDEELYQRLYDSWGLENHKIDVWGELSINEAGNWAGIRNAKTLSGNQSIEYPLADSHELQSGVFLTPSVAKIVLGNDTKGMVACELMLASIPQRAKKNNPFLLAVNDKTVERLTYLPDALPNLDRQALIQNEDETLLRKVIYDAEVKRVKHKIASETEALEAALQEKQQDMTDKLAELSDAFKSTQDKITASTTELESSIKRNEELNNDNHRLNLKIQESKSELDVIIEKSRKVEESMARKVEKLTDFIKEKAIFLKSFEFLDEEDFDFFVGSPLSNKERGEHISFSQALYSNYSDAVSYIQAYLKERDILYPRHIIENFLTLIRTNDLIILAGDSGSGKTNLVQSFAKAIGGVSKIIPVKPNWTSSEDLLGYYNPLEKKYLA…	F1632_26480	gb|KAA6129398.1|	MEAPFVIKFIETKWHDKQTLVSVSESEYSLKLEQTGNNAFSAHTTIYPKVDELRFAQLAIKTKQGDQSPPYIAMPNGERRQLESITDPASNEEWWVEPAHWDAKQRVWRSEARRTAGQIMFVIGSSTLKLDIDISEQTKSDLSRYLSDFKADLWELILDESSHITGDAKNSQVAAIDQEALSLVASILSNAQTILKKPKVELKEIQALKPAKEVRPVPRTFMEICTKGSRKHLTSRASEPSYNVPENQYVLYVVSSTLSIVKQLVKVAESKKSRFSGAIEKLNERLDSLKDYRIINRDLVVKDLERLKKRFDTEVINAELSEQLAKINVNLSRSYSEKGYLRLEKATGSENEWWAKIKPSQNDDWQQFEPDGYTIFSSRDHYASLFKSYSDYEIEAKIP…	Klebsiella pneumoniae subsp. pneumoniae	Gammaproteobacteria
Gammaproteobacteria	Klebsiella pneumoniae	VSKF01000054.1	FXO04_11845	gb|KAB1777880.1|	MALEQVIYNLEEVKGLSDEELYQRLCESWGITNGKLAVWGKILNGPDSDSRKLPTRLLEIKSLQTGLDTEYPINVRLTMDKGVFVSFKSVEELFGLEDGSFVSCELALAPQSEREKHENPFECNVVVSSVRRLIKLPEYTANDIIKGDENIFLDDAVYKLHLQNVQSRIDSEVTALNAEFEREESSLKAQISSYKDQLQHVQDDLNQKNNVLSQAIAKAQKLEVEHSEWQHKIALQKKAEETMSKKIERLKAYVESKAGFLKSFEFLDDDDFDLFVGSTLSNKDRDEHISFSQAFDSNYSDAVSYIQAHLKERDILYPRHIIENFLTLIRTHDLIILAGDSGSGKTNLVQSFAKAIGGVSKIIPVKPNWTSSEDLLGYYNPLEKKYLVTPFLEALIEAK…	FXO04_11850	gb|KAB1777881.1|	MEAPFLIKFIETKWHDKQTLVSVSESEYSLKLEQTGNNAFSANTTIYPKVDELRFAQLAIKTKQGDQSPPYIVMPNGDRKQLESITDPASNAVWWVEPAHWDAKQRVWRSEARRTAGQITFVIGNSTLKLDIDISEQTKSDLSRYLSDFKADLWELILDENSHITSDAKNSQVAAIDQEALSLVASILSNAQTILKKPKVELKEIQALKPAKEVRPVPRTFMEICTKGSRKHLTSRASEPSYNVPENQYVLYVVSSTLSIVKQLVKVAESKKSRFSGAIEKLNERLDSLKDYRIINRDLVVKDLERLKKRFDTEVINAELSEQLAKINVNLSRSYSEKGYLRLEKATGSENEWWAKIKPSQNDDWQQFEPDGYTIFSSRDHYASLFKSYSDYEIEAKIP…	Klebsiella pneumoniae	Gammaproteobacteria
Bacillota	Bacillus sp. B4-WWTP-NA-D-NA-NA	WEIG01000023.1	GBN96_18710	gb|KAB7634835.1|	MIVMKQKTQASTMSKQQDFTKSKVKEILEGMKREGTLGNEVVIRIEEVHKNTVSDGWRYLCYVLDPNDHFNEMKHPLNNYSWNIVFVWKEGAFKEGDVLIGQYKFEQNRKHMGQLIQIVPATLKHMPRLSTLIDRHGDNFGNHLQDAFGGEEKIIGLIYERWLETVEIDMKEWEEKKESVLAELGILNSKFKEKEEEFSDLKNQTTDLKHKKKQLENQIHQLKVVFGFEEGTDFEQTWNDETETYVFTEEEDFYKVLQRALYYYNDENLIYEYDVVKRFFTALQTDQLVLLTGPSGTGKSSLVNQVGQVMQNFKVHHVAVQSSWTDVQDLLGFFNPMKKCYLPTPFLEAIVEARNQEDVIHIICLDEMNLAHVEYYFSSFLSVREKQPNERYVDLYSER…	GBN96_18715	gb|KAB7634836.1|	MKPIWIKVSWNQPPLFFQDELFISKPVEVQVVEELEIQDGAFIATEYTRTTDGFLTIGIKTDKSLKRAYARGKFLYERELVYVSNGIWISCPQYMWSERFKEYQIISSPIGLNQCGTIQFAGETITDERIITNDVKIRPSLVTEAEYIQMEQDLMTITEELLFHAQAGLGDTGKIKSLIDLETLDNQVEKLDEVIRQLEEAPAEKLSSERVRMNVDKLKKFDVRVLLEQEMYPFKQTVNALTTIRSQDIQEHRKIKGAILDFIETCERQSRSEQMMKVNLERQLHDVEEFSQKVVGTREAHFQEKFNSKKEWFRLQSGYFTERDKVWTKIILHLENLSHSYLLQDCEEEEWGDTHIFSFHPVYEESFETIEQLREQLRLQEPLKAFQHDLIQSPDLYEK…	Bacillus sp. B4-WWTP-NA-D-NA-NA	Bacillota
Bacillota	Bacillus sp. B1-b2	WEHU01000002.1	F9279_02725	gb|KAB7672560.1|	MDNTTTNIDIKEDLQEHFEIVLDELGNPREWTQEKTSQFYKKFFKGSTLNKHLTLKIIEIKEYPNFNLFISTVINHETFKPFWNPYLTKNWTVAFTYNKEATSFKVGDLIIATTEELNLEEISNENRKLDLLSIDVSSIQYTSLETSFIYKYGEAFTKRIVKQFGSLEEIAPFIIAEFEKDVDEQIGNLEKYLDIKVNEFEDQELRLEAEHTKIKNERTARYKELELEIEEEYQSKLKKYEIEKDKLDNQERKLEGRRRNISENEKQLQSQEDEIFRRQEELVTRKKSLQEYENSLNSQFERFNLLNPFSQVEAENVFEDNIINWNEQKDIVAIIQGALHAQCNLQYEREVIESFLGALMSNQIIILNGPSGTGKSSLVSNFSNIIFGAKTSTIRVQSS…	F9279_02730	gb|KAB7672561.1|	MELWIAKINTNKKHPIQELISQLIINEDNNSYNSYEYNGTIVVKTCNKNTKSVFLSHYNIKSKSERIPMFYDENYDAWFDKGDEERAPVGINQCGTFFFEAENNEGYVVNRTRDVFVTSKLLSEEEFEQMKDEIANILEDLAVSTSGPVNLLSQKQEQINRMIETHKKIEELKELLLDIDRNPHFELTQQNKLQNYSKVKRINIKTLMEKKLYPFKDKFMVVENVPSTEIIEHGMIRWSLEVLRQNFNRYLLKEQLKISEINNRIQDLINSQSLLGNQRDFSFEGKRISNSIEKDLNFLRKLLLQAEEMESSVENILSSVDDCLQFSILSVKAEELDITQLFTFSPLYSQVFQCINDLLDENNKKSIAFTYQSLQKTPFLYEIWGLLSIIHSLIYNCGF…	Bacillus sp. B1-b2	Bacillota
Gammaproteobacteria	Klebsiella pneumoniae	WFJP01000217.1	GCK90_27085	gb|KAB7972822.1|	VKGFSDEELYQRLCESWGITNGKLAVWGKILNGPDSDSRKLPTRLLEIKSLQTGLDTEYPINVRLTMDKGVFVSFKSVEELFGLEDGSFVSCELALAPQSEREKHENPFECNVVVSSVRRLIKLPEYTANDIIKGDENIFLDEAVYKQHLQNVQSRIDSEVTALNAEFEREESSLKAQISSYKDQLQHVQDDLNQKNNVLSQAIAKAQKLEVEHSEWQHKIALQKKAEETMSKKIERLKAYVESKAGFLKSFEFLDDDDFDLFVGSTLSNKDRDEHISFSQAFDSNYSDAVSYIQAHLKERDILYPRHIIENFLTLIRTHDLIILAGDSGSGKTNLVQSFAKAIGGVSKIIPVKPNWTSSEDLLGYYNPLEKKYLVTPFLEALIEAKQNPDIPYFICLD…	GCK90_27080	gb|KAB7972821.1|	MEAPFVIKFIETKWHDKQTLVSVSESEYSLKLEQTGNNAFSAHTTIYPKVDELRFAQLAIKTKQGDQSPPYIVMPNGDRKQLESITDPASNAVWWVEPAHWDAKQRVWRSEARRTAGQITFVIGNSTLKLDIDISEQTKSDLSRYLSDFKADLWELILDENSHITGDAKNSQVAAIGQEALSLVASILSNAQTILKKPKVELKEIQALKPAKEVRPVPRTFMEICTKGSRKHLTSRASEPSYNVPENQYVLYVVSSTLSIVKQLVKVAESKKSRFSGAIEKLNERLDSLKDYRIINRDLVVKDLERLKKRFDTEVINAELSEQLAKINVNLSRSYSEKGYLRLEKATGSENEWWAKIKLSQNDDWQQFEPDGYTIFNSRDHYASLFKAYSDYEIEAKIP…	Klebsiella pneumoniae	Gammaproteobacteria
Gammaproteobacteria	Klebsiella pneumoniae MGH 72	JMZH01000018.1	AD98_04783	gb|KDL79252.1|	MALEQVIYNLEEVKGLSDEELYQRLYDSWGLENHKIDVWGELSINEAGNWAGIRNAKTLSGNQSIEYPLADSHELQSGVFLTPSVAKIVLGNDTKGMVACELMLASIPQRAKKNNPFLLAVNDKTVERLTYLPDALPNLDRQALIQNEDETLLRKVIYDAEVKRVKHKIASETEALEAALQEKQQDMTDKLAELSDAFKSTQDKITASTTELESSIKRNEELNNDNHRLNLKIQESKSELDVIIEKSRKVEESMARKVEKLTDFIKEKAIFLKSFEFLDEEDFDFFVGSPLSNKERGEHISFSQALYSNYSDAVSYIQAYLKERDILYPRHIIENFLTLIRTNDLIILAGDSGSGKTNLVQSFAKAIGGVSKIIPVKPNWTSSEDLLGYYNPLEKKYLA…	AD98_04782	gb|KDL79251.1|	MEAPFVIKFIETKWHDKQTLVSVSESEYSLKLEQTGNNAFSAHTTIYPKVDELRFAQLAIKTKQGDQSPPYIAMPNGERRQLESITDPASNEEWWVEPAHWDAKQRVWRSEARRTAGQIMFVIGSSTLKLDIDISEQTKSDLSRYLSDFKADLWELILDESSHITGDAKNSQVAAIDQEALSLVASILSNAQTILKKPKVELKEIQALKPAKEVRPVPRTFMEICTKGSRKHLTSRASEPSYNVPENQYVLYVVSSTLSIVKQLVKVAESKKSRFSGAIEKLNERLDSLKDYRIINRDLVVKDLERLKKRFDTEVINAELSEQLAKINVNLSRSYSEKGYLRLEKATGSENEWWAKIKPSQNDDWQQFEPDGYTIFSSRDHYASLFKSYSDYEIEAKIP…	Klebsiella pneumoniae MGH 72	Gammaproteobacteria
Bacillota	Lysinibacillus sp. BF-4	JPUW01000029.1	CH76_09940	gb|KFL42876.1|	MVLVDEKFYTDLDIVKYYDSMRNFQKWLLDDSYQMDNTVHMACKEVLEFLRLGTRTKQKKIYKDYFDQYDVEQLKQYKDMINNLDTIYIREEPIFHFKKKLIELGIFTFTNSYLENVISPHAEDKVETEYTTWLQGDVKNIIEQLKVEYTETTVSEALAKKFTKELQKLIGKKIIIKITDITSKSVVGIPLELTVNGYEEMRHPFLEISWEVSAPVENALFEIGEVVEAYYNESRNEYYRHLLIFVDFRNATPIANTLSDLLEVISRSIKNKALIKTLEIPKNPELIETHILKKIIERSEPLRSKAEEKLEGIYRNLEEIETKKRALKKERDNLDQATRRWKNIVEKINGFKRMEQVERVQQDYEIHKYEPSSFIKTLQTLIYKNNDQQLIYQENDLRT…	CH76_09935	gb|KFL42875.1|	MKLFHIVVNNELKCKEELYFDGKDYFSCEYNSIKKKFTQIGVKVEANEVFVRQFEKNILSLTYDTLTGIWYQKSNDWIENDFMNKSHSIFGINVGGKFEIVALNQKYEEIEKVTVNITPGTMSIEEYQLMQQEVSYLFEMFSYDLTDDKFNRKNLLRRVQIPLFPLSTFSQLVEDTEILLSELCQKPEVELRQIVKKIHVKDVTKWTPTLIIDEALKKQGKVRALINEKCTDIRENRMVKFMLDEYLKRATNELKLEQQQRKMFELEASELLLMLSQTKGELTVQPRRLHKILKKDIQLLEMRNQKWHEIIKRIEIMLENQLMAVESELLEETYLFRMHAYYSELYDIYNQYEQLLPELTSTFRLFVENLLRSPTLYEVWVLLKIVQYLMQWGLNPKEF…	Lysinibacillus sp. BF-4	Bacillota
Bacillota	Lysinibacillus boronitolerans JCM 21713 = 10a = NBRC 103108	JPVR01000077.1	CD31_15620	gb|KGR83641.1|	MNSIVLDSEFLNNIEITKYLPSFTKFHSWLLEEDYSLYDESFLAAKDVLSFIKSGAKTKKKKILKLYFEQFDNENIKQFISPLSDAIEANINEDMSLALSKKNELISLGILNFTKQYIEQISKYNPQPLIDTESSTQQIHLEVKNDEQIIQQDSLKIIKQKSHYISWLEGDIVPTLEKLKREYANNTISEESVRNFVKEFRKFVGGKLLFYITDVNEKTVSGIPLEITSSGYEEMKHPFLNITWEVSAPIEKYVKNIKYKAGDIVEASFNETRNENFRYLLLFVDFGRATALPRTILDVLATNLKQDVLKEVLINLNVSEENDEHIQAYVIQKVLERSDLVKQKLMKNLENLEENLTLIQIKEKELEQQQMELNEQEKQWQNILQRIDYYKRFEQFNNV…	CD31_15615	gb|KGR83640.1|	MKLFHIICEDEITCLDELQFNGKEYFSCEYNKKRGKMFEIGVKVNAASEVIVKQFNNRVLSLDYDADMDIWYQKKTQWIEKGFKRRSDGIFGFNVGGSFEVEALDETGNLLDSVHVNITPGTMSIEEYKSMQHEVRRLFEIFSYDLTDNKFEENNVLSRVQLPMFPLQTFHLIVQEVAALVNELVERPEVELQTVVKKINVKDVRKWTPSIIIENALKQQEKVVALVSEQVTDIKENKMLKNIIEQFLERTISELIAEKSQLKLFQEEIEELKIMISQENSSVVEKPKQLLIVLNNDCLVLQQRIEQWSSLKVTLDELLELPMLQVESEQLEDTHLFRMHTYYSRIYDLFMQYENLTPELTDTFRMFIQVLLKSPTLYEVWVLLKIIQQLSQWGVNPRE…	Lysinibacillus boronitolerans JCM 21713 = 10a = NBRC 103108	Bacillota
Gammaproteobacteria	Pantoea rodasii	JTJJ01000016.1	QU24_03610	gb|KHJ69396.1|	MALEQVIYDPEEVKGFSDEELYRRLCESWGSTSGKLAVWGKIKNRTNFDDRKLPTLLLDIKSLQTGLHLEYPINVRLAMVKGVFISFKSVEELFGIDDESFISCELALAPQSEREKHENPFECNVVVSSVRRLIKLPEYRANDIINGDESIFLDDAVYKLHLQNVQSRIDGEVSALKAEFEREESSLKAQISSYEVLLQQTQEELNKNNNILSQARVKTQELEEKNTEWLRKIALQKKVEETMSKKIERLKAYVESKALFLKSFEFLDDEDFDIFVGNRSSAAQQGKHISFSQTLDSKYSNAVSYIQAHLKERDILYPRHIIENFLTLIRTNDLIILAGDSGSGKTNLVQSFAKAIGGVSKIIPVKPNWTSSEDLLGYYNPLEKKYLATPFLEALIEAK…	QU24_03605	gb|KHJ69395.1|	MDVPFIIKFIETKWHDKQTLVSVNESEYSLKLEHLGNNTFSAHTIIYPKVEELRFAQLAIKAKHGDKSPPYIAMPNGERKPLESIIDPASNSVWWVEPAHWDKKQRVWRSEARRTAGQITFVVGNSTLKLDIDISEQTKSDLSRYLSDFKADLWELILDENSHITGDAKKSLVATIDQKALSLVASILTNVQTILKKPKVELKEIQELKPTKEVRPVPRTFMEICTKGSRNHLTSRASEPSYNVPENQYVLHVVSNTLNIVKKLVRVAESKKSRFSDAVDKLNERLESLKNYRSINRDLVVKDLERLKKLFDTKEINKELANKLDEIKTNMYFSQNIAAKGYLRLEKATGSENEWWAKIKPQLSDDWQQFEQDRYTIFSSGSPYSSLFKPYSDYEMEAI…	Pantoea rodasii	Gammaproteobacteria
Gammaproteobacteria	Pseudoalteromonas elyakovii	JTDZ01000012.1	PL71_04500	gb|KHM50250.1|	MLGEPVKYSLDVVKDLSDEELYQRLFKCWGIKNKKIEVWGELTKQDGAVPYRLKHVRNVIDNKLIEYPIDVSYGLQSGIFVYPSIGNKYYITDQRTFVRGKLILTKLSERIKHGNPFELNLSSDDIEPLEQLPIAINEIDRLSDIDKSIVLGEGTERFIDKVIYEQQLSKLKTEFEETQKSEIETHLSRLNSMTRAVSIEKVELHAIKDSVESSKKENQQLGSESKLLRQSIEKKEHELAILDDKYKGLEEVMAKKIEKLKAFIEEKAVFLKSFEFIDDDEFNSFVSNITKVSERPEHIEFSDHLNGDYKQAVSYIQAYLKERDILYPRHIIENYLTLIRSNDLIILAGDSGSGKTNLVNSFADAVGGKSIIIPVKPNWTSSEDLLGYYNPLEKKYLAT…	PL71_04495	gb|KHM49740.1|	MKAEFEAKYIDITWYDKNTVLSITESLLPLDCEYEVDKYICSTVIYPKTEGIECGQLAFRFLKKSTIKPYFVNGAGEKIVLKCVLDTETLKEWWIEADSWSSKSKRWQGKAHRTAGSIKVYLAHEVCQVNIGSYDFTLEQLDTYLADFKSDLWELILDEQSYVKGKGKTVNDGVVTQDTITLVNNLLSHSQNILKNPKAELREVQTLKPRKAVKPVNRTFMELATKGGSKLLTSRSTEPSYNVPENRYILYVLERLYKIIKQLVAISQNKTKRYESNIVKLGSRLEAFVEDKLIDKDLVKKDLEKLRDSFNTKFLSANLQEKLELFNQRGLGEQNTSICFLKIGSKTKGGDSRFLAIKKEYSDNWFETEVATQNVFLKQGEPLFLNLLEQGFEYKIMGN…	Pseudoalteromonas elyakovii	Gammaproteobacteria
Gammaproteobacteria	Vibrio sinaloensis	JWLV01000010.1	RJ47_08530	gb|KHT45909.1|	MALEQVIYDLEQVKGLSDEELYQRLYDSWGLENNKIDVWGELGINEAGNWAGIRNAKTLNGNQSIEYPLADSYELQSGVFLNPSVAKIVLGNDTKGMVACELMLASIPQRAKKNNPFLLAVNDKTVERLTYLPDALPNLDRQALIQNEDETLLRKVIYDAEVKRVKHKIASETEALEATLLEKQQDMTEKLAELSDAFKSTQDKITASTTELESSIKRNEELNDDNHRLNLKIQESKAELDVIIEKSRRVEESMARKVEKLTDFIKEKAIFLKSFEFLDEEDFDFFVGSPLSNKECGEHISFSQAFDSNYSDAVSYIQAHLKERDILYPCHIIENFLTLIRTNDLIILAGDSGSGKTNLVQSFAKAIGGVSKIIPVKPNWTSSEDLLGYYNPLEKKYLA…	RJ47_08535	gb|KHT45910.1|	MMEAPFVIKFIETKWHDKQTLVSVSESEYSLKLDQMGNNAFSAHTTIYPKVDELRFAQLAIKTKYGNQSPPYIAMPNGDRKQLESITDPASNAVWWVEPAHWDAKQRVWRSEARRTAGQIAFVIGNSTLKLDIDISEQTKSDLSRYLSDFKADLWELILDENSHITGDAKNSQVAAIDQEALSLVASILSNAQTILKKPKVELKEVQALKPVKEVRPVPRTFMEICTKGSRKHLTSRASEPSYNVPENQYVLYVVSSTLSIVKQLVRVAESKKSRFSGAIEKLNERLDSLKDYRIINRDLVVKDLERLKKRFDTEVINAELSEQLAKINVNLSRSYSEKGYLRLEKATGSENEWWAKIKPSQNDDWQQFEPDGYTIFSSRGHYASLFKSYSDYEIEAKI…	Vibrio sinaloensis	Gammaproteobacteria
Gammaproteobacteria	Enterobacter hormaechei subsp. steigerwaltii	LEDO01000042.1	ABF72_15075	gb|KLQ25621.1|	MALEQVIYNLEEVKGFSDEELYQRLCESWGITNGKLAVWGKILNGPDSDSRKLPTRLLEIKSLQTGLDTEYPINVRLTMDKGVFVSFKSVEELFGLEDGSFVSCELALAPQSEREKHENPFECNVVVSSVRRLIKLPEYTANDIIKGDENIFLDEAVYKQHLQNVQSRIDSEVTALNAEFEREESSLKAQISSYKDQLQHVQDDLNQKNNVLSQAIAKAQKLEVEHSEWQHKIALQKKAEETMSKKIERLKAYVESKAGFLKSFEFLDDDDFDLFVGSTLSNKDRDEHISFSQAFDSNYSDAVSYIQAHLKERDILYPRHIIENFLTLIRTHDLIILAGDSGSGKTNLVQSFAKAIGGVSKIIPVKPNWTSSEDLLGYYNPLEKKYLVTPFLEALIEAK…	ABF72_15080	gb|KLQ25622.1|	MMEAPFVIKFIETKWHDKQTLVSVSESEYSLKLEQTGNNAFSAHTTIYPKVDELRFAQLAIKTKQGDQSPPYIVMPNGDRKQLESITDPASNAVWWVEPAHWDAKQRVWRSEARRTAGQITFVIGNSTLKLDIDISEQTKSDLSRYLSDFKADLWELILDENSHITGDAKNSQVAAIGQEALSLVASILSNAQTILKKPKVELKEIQALKPAKEVRPVPRTFMEICTKGSRKHLTSRASEPSYNVPENQYVLYVVSSTLSIVKQLVKVAESKKSRFSGAIEKLNERLDSLKDYRIINRDLVVKDLERLKKRFDTEVINAELSEQLAKINVNLSRSYSEKGYLRLEKATGSENEWWAKIKLSQNDDWQQFEPDGYTIFNSRDHYASLFKAYSDYEIEAKI…	Enterobacter hormaechei subsp. steigerwaltii	Gammaproteobacteria
Bacillota	Peptococcaceae bacterium 1109	LDJB01000002.1	AA931_08745	gb|KLU40004.1|	MLSPEYELSEDYVQYWWIIPLLTESQEHALVGRVESVSSKRCIIRCEIPGLPTSLGEPATLFLASHKALAEAGAVKKDDLVRFHWVNPGTAKRDRNGTAYAIAKNVRQITEDAFEERRKNLLDYLQAELIKRLHHELSKAEASIDEEVSSRTQSKLAEAEAKLEQAVKLKELAEQQLGQAVAKDIQLEQERRSLADTWRELEGKGKVLEAKANELAAEKAKLESLYENHIKHIEYLFPKEVKAGRTARASMNLVEIREQWVKAIESAGLRLPEDICLSFLVSTLTACLSGCLVLLSGPVGTGKTSTIRTAAQLLDGGDEVVPVRPGWLDSSDLLGFYDPLRNIYSPSPFVNGLIEAKNYSDRLFFLALDELNLARIEDYGADLLSVLEYSKGDGEGQRT…	AA931_08740	gb|KLU40003.1|	MYPKITFRDENGPLPEIDGLPHIRQFQGEWWVQLSTPWEGKVALKKRDGQLLELTSTDKQNWFIPKDRPKKRRIRDAVKTPAGTVLVKLTDEHGRELHGQGTAAKLEVLTANIGDEELEKMLRDIGLLALSTSTYLYGNLAGPVPDQLGEGQIGGIPQGMRGYFRSAESLLRLGRALQQNWAVITKRPLREIKVGTGINRDYYQVRSPQMLVKAYVRGPHTPQLGLRRLSGSDCSENQFLCHLLDHYLILVAEGTAALLQSSQGELVDESVLDELASIANFEGFTRQARARLSKANQVTAELNKTIAATLQELQQTIEWAKKARRTSFLKDVSTPRVLPEITQRLLGTPGYAAVVREFFNSRKASLDGIQHVLSLFTELWQGNVKATWELYEIWCLVRL…	Peptococcaceae bacterium 1109	Bacillota
Gammaproteobacteria	Klebsiella quasipneumoniae subsp. quasipneumoniae	LFAH01000023.1	SM66_04998	gb|KMH08502.1|	MALEQVIYNLEEVKGLSDEELYQRLYDSWGLENHKIDVWGELSINEAGNWAGIRNAKTLSGNQSIEYPLADSHELQSGVFLTPSVAKIVLGNDTKGMVACELMLASIPQRAKKNNPFLLAVNDKTVERLTYLPDALPNLDRQALIQNEDETLLRKVIYDAEVKRVKHKIASETEALEAALQEKQQDMTDKLAELSDAFKSTQDKITASTTELESSIKRNEELNNDNHRLNLKIQESKAELDVIIEKSRKVEESMARKVEKLTDFIKEKAIFLKSFEFLDEEDFDSFVGSPLSNKERGEHISFSQALYSNYSDAVSYILAYLKERDILYPRHIIENFLTLIRTNDLIILAGDSGSGKTNLVQSFAKAIGGVSKIIPVKPNWTSSEDLLGYYNPLEKKYLA…	SM66_04999	gb|KMH08503.1|	MEAPFVIKFIETKWHDKQTLVSVSESEYSLKLEQTGNNAFSAHTTIYPKVDELRFAQLAIKTKQGDQSPPYIAMPNGERRQLESITDPASNEEWWVEPAHWDAKQRVWRSEARRTAGQIMFVIGSSTLKLDIDISEQTKSDLSRYLSDFKADLWELILDESSHITGDAKNSQVAAIDQEALSLVASILSNAQTILKKPKVELKEIQALKPAKEVRPVPRTFMEICTKGSRKHLTSRASEPSYNVPENQYVLYVVSSTLSIVKQLVKVAESKKSRFSGAIEKLNERLDSLKDYRIINRDLVVKDLERLKKRFDTEVINAELSEQLAKINVNLSRSYSEKGYLRLEKATGSENEWWAKIKPSQNDDWQQFEPDGYTIFSSRDHYASLFKSYSDYEIEAKIP…	Klebsiella quasipneumoniae subsp. quasipneumoniae	Gammaproteobacteria
Gammaproteobacteria	Klebsiella pneumoniae	LFBD01000016.1	SM88_05148	gb|KMI23746.1|	MALEQVIYNLEEVKGLSDEELYQRLYDSWGLENHKIDVWGELSINEAGNWAGIRNAKTLSGNQSIEYPLADSHELQSGVFLTPSVAKIVLGNDTKGMVACELMLASIPQRAKKNNPFLLAVNDKTVERLTYLPDALPNLDRQALIQNEDETLLRKVIYDAEVKRVKHKIASETEALEAALQEKQQDMTDKLAELSDAFKSTQDKITASTTELESSIKRNEELNNDNHRLNLKIQESKAELDVIIEKSRKVEENMARKVEKLTDFIKEKAIFLKSFEFLDEEDFDFFVGSPLSNKERGEHISFSQALYSNYSDAVSYIQAYLKERDILYPRHIIENFLTLIRTNDLIILAGDSGSGKTNLVQSFAKAIGGVSKIIPVKPNWTSSEDLLGYYNPLEKKYLA…	SM88_05147	gb|KMI23745.1|	MEAPFVIKFIETKWHDKQTLVSVSESEYSLKLEQTGNNAFSAHTTIYPKVDELRFAQLAIKTKQGDQSPPYIAMPNGERRQLESITDPASNEEWWVEPAHWDAKQRVWRSEARRTAGQIMFVIGSSTLKLDIDISEQTKSDLSRYLSDFKADLWELILDESSHITGDAKNSQVAAIDQEALSLVASILSNAQTILKKPKVELKEIQALKPAKEVRPVPRTFMEICTKGSRKHLTSRASEPSYNVPENQYVLYVVSSTLSIVKQLVKVAESKKSRFSGAIEKLNERLDSLKDYRIINRDLVVKDLERLKKRFDTEVINAELSEQLAKINVNLSRSYSEKGYLRLEKATGSENEWWAKIKPSQNDDWQQFEPDGYTIFSSRDHYASLFKSYSDYEIEAKIP…	Klebsiella pneumoniae	Gammaproteobacteria
Gammaproteobacteria	Pseudomonas helleri	JYLE01000004.1	TU85_02900	gb|KMN24568.1|	MQQDGVSAASGEGYAEELPSLGWSEEDLRYYLAQVWGQRDPLHLRVIGRLQLAEGKTFGFLVDLHHAETGIRLPPPLKNASVRQSVFVPPSELSRIQKLGRIESFASAELDLSPLDERKKRGDPFGCMVHPETLEPLSHIPESWWSIKNIQSEAMPLVVTKVREAIEDRLQRETSEAGDKLLAAQLALEVAAQNKKLLDDEYGRIGLEVDQRMDRIAALDTEFVQRKNTLETRFRELEAFLQDRSERMVALNLIDRADMEKVFPLIGAPDTREGHRFREALAGNLQRLASYIQTFLWRKGILYTRAQLLDFITLLRTNDLIVLAGDSGSGKTNLVKSVASAVGGRCTIVPVKPNWTGSDDLLGYYNPIERRYHPTQFLLALLDAAREPEIPHFICLDEM…	TU85_02895	gb|KMN24567.1|	MPPEIEARYLTIDWQSEGVARAIEVAPVSLEIESRTDGEFVVESVIFNDFQPWLGIRVGPGFEEVMPVFVTALGQETPMLQVADPRGGGFWWLRNDGWDHAGKRHLSELQRSAGVYNIRIGDLTLRVENRLSTFGRADIQAYIDDFRGDLLWMIMNDSAGATATGKGAGAGTEFADALKELHTASHRVLASPAVNIREGQAQQPLAKLRPNTVTFREYARNPTARQLTGRVFNESADTAENRYLRHVLAVSLKVADAYVSAASLQSSFLDRLASQESERARRDREMEMRPVEPEVFDQQTEEIKRKLDALADFKSRSGHEADLVGRFPIRLGKRYFDHFAFYYTPQDAMASNVASPVDYRVVVLPKDLFELILGAHHFCKNFTLTGSVDSRVRDTSKGQ…	Pseudomonas helleri	Gammaproteobacteria
Gammaproteobacteria	Klebsiella quasipneumoniae subsp. quasipneumoniae	LGAL01000039.1	ACW63_24440	gb|KNG95779.1|	MALEQVIYNLEEVKGLSDEELYQRLYDSWGLENHKIDVWGELSINEAGNWAGIRNAKTLSGNQSIEYPLADSHELQSGVFLTPSVAKIVLGNDTKGMVACELMLASIPQRAKKNNPFLLAVNDKTVERLTYLPDALPNLDRQALIQNEDETLLRKVIYDAEVKRVKHKIASETEALEAALQEKQQDMTDKLAELSDAFKSTQDKITASTTELESSIKRNEELNNDNHRLNLKIQESKSELDVIIEKSRKVEESMARKVEKLTDFIKEKAIFLKSFEFLDEEDFDFFVGSPLSNKERGEHISFSQALYSNYSDAVSYIQAYLKERDILYPRHIIENFLTLIRTNDLIILAGDSGSGKTNLVQSFAKAIGGVSKIIPVKPNWTSSEDLLGYYNPLEKKYLA…	ACW63_24445	gb|KNG95780.1|	MMEAPFVIKFIETKWHDKQTLVSVSESEYSLKLEQTGNNAFSAHTTIYPKVDELRFAQLAIKTKQGDQSPPYIAMPNGERRQLESITDPASNEEWWVEPAHWDAKQRVWRSEARRTAGQIMFVIGSSTLKLDIDISEQTKSDLSRYLSDFKADLWELILDESSHITGDAKNSQVAAIDQEALSLVASILSNAQTILKKPKVELKEIQALKPAKEVRPVPRTFMEICTKGSRKHLTSRASEPSYNVPENQYVLYVVSSTLSIVKQLVKVAESKKSRFSGAIEKLNERLDSLKDYRIINRDLVVKDLERLKKRFDTEVINAELSEQLAKINVNLSRSYSEKGYLRLEKATGSENEWWAKIKPSQNDDWQQFEPDGYTIFSSRDHYASLFKSYSDYEIEAKI…	Klebsiella quasipneumoniae subsp. quasipneumoniae	Gammaproteobacteria
Bacillota	Clostridioides difficile	JRHM01000024.1	KW94_04145	gb|KPI55194.1|	MEILANQQELLNQEDFLKCKSLEKKLENLNSYWKVNEKIFQGTVSIIDNKNNYFLVKNITTLDGKKRLLNPFTGKELTIKSNLSEIEDLKKEDNIAFELVPISTKKREDYGPVNIKYNSAIKIEDIETFCSETDSKIADIINIIKSNKNMKIYKVLVNSEAFHEDAKKIYSEELSKSKIEKEELFLKIEECKRKLEDINKDIENEKRERQELINLGILKEPKIQYKNNEKIDLSKEEQINYLTKYLSSSYKTNLYHNKETIKQLYSALSTNQITILSGSPGTGKTSLIEGFCDACGINKKIISVQPDWSENQDLIGFYNPIDKKYIPTPFLDFLIEARKNPTDLFIVCFDEMNLAHIEYYFSEFLSKLESEDRELELYSKNIYDENRKNTEIQLKFIKK…	KW94_04140	gb|KPI55193.1|	MKLISYLVNIQEKYKLYEQDVLPIKLKEYANKKKYTLKEISKFNYLNKSLYKKGTNLSIDFLTIFTHYNIQGKNYELAFKIELDENENINDYILRYKTYFLNKDIEHILRYIATEDIFIDTSFYDSYNKKIYTTNIFDTAGYIDLEIENVKNNSKESIPIRVLPSSIEYEDYIEMIQDLISIREDIVVNDSSKVGIGNHWATRENNFIACINNIYRHIIQINKNPQSKLSQEKSKVSYNKIKNIGLKTIIEKSIYQHKNKYSTTISIEDFNIYENQIIKYSLIKIKEKIQAYKSRFEINLKNNEDYLIHLKKNLEDIFSNTIENQKCIFEDTINNMICSYENSSSINNIKVKLKLYINLKYFKNEYKPKIDLDYNNTNKFTLKFKSTYLTEYDYDLNFG…	Clostridioides difficile	Bacillota
Gammaproteobacteria	Klebsiella pneumoniae	JUBM01000072.1	AT479_27020	gb|KSV34665.1|	MALEQVIYNLEEVKGLSDEELYQRLYDSWGLENHKIDVWGELSINEAGNWAGIRNAKTLSGNQSIEYPLADSHELQSGVFLTPSVAKIVLGNDTKGMVACELMLASIPQRAKKNNPFLLAVNDKTVERLTYLPDALPNLDRQALIQNEDETLLRKVIYDAEVKRVKHKIASETEALEAALQEKQQDMTDKLAELSDAFKSTQDKITASTTELESSIKRNEELNNDNHRLNLKIQESKSELDVIIEKSRKVEESMARKVEKLTDFIKEKAIFLKSFEFLDEEDFDFFVGSPLSNKERGEHISFSQALYSNYSDAVSYIQAYLKERDILYPRHIIENFLTLIRTNDLIILAGDSGSGKTNLVQSFAKAIGGVSKIIPVKPNWTSSEDLLGYYNPLEKKYLA…	AT479_27025	gb|KSV34666.1|	MMEAPFVIKFIETKWHDKQTLVSVSESEYSLKLEQTGNNAFSAHTTIYPKVDELRFAQLAIKTKQGDQSPPYIAMPNGERRQLESITDPASNEEWWVEPAHWDAKQRVWRSEARRTAGQIMFVIGSSTLKLDIDISEQTKSDLSRYLSDFKADLWELILDESSHITGDAKNSQVAAIDQEALSLVASILSNAQTILKKPKVELKEIQALKPAKEVRPVPRTFMEICTKGSRKHLTSRASEPSYNVPENQYVLYVVSSTLSIVKQLVKVAESKKSRFSGAIEKLNERLDSLKDYRIINRDLVVKDLERLKKRFDTEVINAELSEQLAKINVNLSRSYSEKGYLRLEKATGSENEWWAKIKPSQNDDWQQFEPDGYTIFSSRDHYASLFKSYSDYEIEAKI…	Klebsiella pneumoniae	Gammaproteobacteria
Bacillota	Bacillus cereus	LQZN01000053.1	ACS45_05325	gb|KXI54255.1|	MGRKKESVLAELGILNSKFKEKEEEFSDLKNQTTDLKHKKKQLENQIHQLKVVFGFEEGTDFEQTWNDETETYVFTEEEDFYKVLQRALYYYNDENLIYEYDVVKRFFTALQTDQLVLLTGPSGTGKSSLVNQVGQVMQNFKVHHVAVQSSWTDVQDLLGFFNPMKKCYLPTPFLEAIVEARNQEDVIHIICLDEMNLAHVEYYFSSFLSVREKQPNERYVDLYSERFYREAKSDLEALFQKPIVEITDLDIQELDFERRQEARNKYELLFYYPARFLVPSNVRFVGTLNMDETVKSLSPKVIDRSFIIELDHPTKLNRLHQELKESPFVEKIQFDVKKFISPAIEAPSLSTQQVDAIEKVIELADKLDSIPNARLNSRGRKHMERYVSCLPSIDGVVN…	ACS45_05315	gb|KXI54253.1|	MGKIFKAYVGRSLKKALADTDWNVSLQDRGYYLFERKSALKPDIVVERNDITRKIILDTKWKALYNNPRSNYDQLKESIVLMIKENTDLQKRERLKKEINRELNSIHSKVNDNE	Bacillus cereus	Bacillota
Bacillota	Clostridium saccharobutylicum	JACEQZ010000025.1	FHX55_003691	gb|MBA2907018.1|	MKNEKINLNQEEATILEAQVISTESGFNKENEIIISDELRNEEVNLNNNKDIMITEVNSDEIIKMSNENKIEYLEKNVFKSKFVLGRLNKIRDGKNGKYTFVDLVLPYDINTNYKINGTNWRAFCDFNYVPNDVKQTLNQGDLIYFRPELNSINPHDIIRVNGITVKKLTSYKEFLKKENIELKDVKIGGLVALEREEDIRVWATEEFYRNFGQLHDDLLANVEEEQKKIESIMKEKEKLYKSIQDERDKADKKKKDLEKELERNKKKADQEIKNKEDMLNKKKKEIENLVRKLEYFGFKGFKDNEEQESLLKDNLLDSTFNELFDYIKNYLKYNKKLIYSDDTIRRFLVALQSNELVILSGPSGTGKSSIVTAVAEAIGGVAKIIPVKPSWTESEDLI…	FHX55_003690	gb|MBA2907017.1|	MEIKLVLLDINNGKFEIYKEINEYCENNLCITQYEKNKRNNNFLHLGVKLIDVYNPKDYIVSIGNENYNNLKFNNDVECFYQETIGEDADQIGISKAGFFKVEIRNSERKIVYTSEQILVKPSIISVEMYKQMVDMLLNINKDLVMQDFSNIYLNIEGKKEDLSETVLNFLNNIENLIYNINKNPYVELVKEDAKVSYKKIKKISSKVIIEKELYPFKNKFMSEVARESKDTYENRMICSALLDIKNLIETNLNMNLNYINKINKDIKITTAQINSMCNTPIATQKMSASNAEERAILNLGRNNSSDRLPLPMRPHGNLEYFNDLERKLERLNNTIKLLKDCKANWTSSNNKIDAYLKLEIFKELKMTQKRREKWRTTQVFLHDLTYGKLYRKLKNFCE…	Clostridium saccharobutylicum	Bacillota
Gammaproteobacteria	Klebsiella pneumoniae	JACNYB010000048.1	H8M84_26925	gb|MBC4066507.1|	MALEQVIYNLEEVKGLSDEELYQRLYDSWGLENHKIDVWGELSINEAGNWAGIRNAKTLSGNQSIEYPLADSHELQSGVFLTPSVAKIVLGNDTKGMVACELMLASIPQRAKKNNPFLLAVNDKTVERLTYLPDALPNLDRQALIQNEDETLLRKVIYDAEVKRVKHKIASETEALEAALQEKQQDMTDKLAELSDAFKSTQDKITASTTELESSIKRNEELNNDNHRLNLKIQESKAELDVIIEKSRKVEENMARKVEKLTDFIKEKAIFLKSFEFLDEEDFDFFVGSPLSNKERGEHISFSQALYSNYSDAVSYIQAYLKERDILYPRHIIENFLTLIRTNDLIILAGDSGSGKTNLVQSFAKAIGGVSKIIPVKPNWTSSEDLLGYYNPLEKKYLA…	H8M84_26920	gb|MBC4066506.1|	MEAPFVIKFIETKWHDKQTLVSVSESEYSLKLEQTGNNAFSAHTTIYPKVDELRFAQLAIKTKQGDQSPPYIAMPNGERRQLESITDPASNEEWWVEPAHWDAKQRVWRSEARRTAGQIMFVIGSSTLKLDIDISEQTKSDLSRYLSDFKADLWELILDESSHITGDAKNSQVAAIDQEALSLVASILSNAQTILKKPKVELKEIQALKPAKEVRPVPRTFMEICTKGSRKHLTSRASEPSYNVPENQYVLYVVSSTLSIVKQLVKVAESKKSRFSGAIEKLNERLDSLKDYRIINRDLVVKDLERLKKRFDTEVINAELSEQLAKINVNLSRSYSEKGYLRLEKATGSENEWWAKIKPSQNDDWQQFEPDGYTIFSSRDHYASLFKSYSDYEIEAKIP…	Klebsiella pneumoniae	Gammaproteobacteria
Gammaproteobacteria	Klebsiella variicola	JACNVK010000039.1	H8M50_25780	gb|MBC4425724.1|	MALEQVIYNLEEVKGLSDEELYQRLYDSWGLENHKIDVWGELSINEAGNWAGIRNAKTLSGNQSIEYPLADSHELQSGVFLTPSVAKIVLGNDTKGMVACELMLASIPQRAKKNNPFLLAVNDKTVERLTYLPDALPNLDRQALIQNEDETLLRKVIYDAEVKRVKHKIASETEALEAALQEKQQDMTDKLAELSDAFKSTQDKITASTTELESSIKRNEELNNDNHRLNLKIQESKAELDVIIEKSRKVEESMARKVEKLTDFIKEKAIFLKSFGFLDEEDFDFFVGSPLSNKERGEHISFSQALYSNYSDAVSYIQAYLKERDILYPRHIIENFLTLIRTNDLIILAGDSGSGKTNLVQSFAKAIGGVSKIIPVKPNWTSSEDLLGYYNPLEKKYLA…	H8M50_25775	gb|MBC4425723.1|	MEAPFVIKFIETKWHDKQTLVSVSESEYSLKLEQTGNNAFSAHTTIYPKVDELRFAQLAIKTKQGDQSPPYIAMPNGERRQLESITDPASNEEWWVEPAHWDAKQRVWRSEARRTAGQIMFVIGSSTLKLDIDISEQTKSDLSRYLSDFKADLWELILDESSHITGDAKNSQVAAIDQEALSLVASILSNAQTILKKPKVELKEIQALKPAKEVRPVPRTFMEICTKGSRKHLTSRASEPSYNVPENQYVLYVVSSTLSIVKQLVKVAESKKSRFSGAIEKLNERLDSLKDYRIINRDLVVKDLERLKKRFDTEVINAELSEQLAKINVNLSRSYSEKGYLRLEKATGSENEWWAKIKPSQNDDWQQFEPDGYTIFSSRDHYASLFKSYSDYEIEAKIP…	Klebsiella variicola	Gammaproteobacteria
Gammaproteobacteria	Klebsiella pneumoniae	JACNTY010000039.1	H8L64_27010	gb|MBC4627834.1|	MALEQVIYNLEEVKGLSDEELYQRLYDSWGLENHKIDVWGELSINEAGNWAGIRNAKTLSGNQSIEYPLADSHELQSGVFLTPSVAKIVLGNDTKGMVACELMLASIPQRAKKNNPFLLAVNDKTVERLTYLPDALPNLDRQALIQNEDETLLRKVIYDAEVKRVKHKIASETEALEAALQEKQQDMTDKLAELSDAFKSTQDKITASTTELESSIKRNEELNNDNHRLNLKIQESKAELDVIIEKSRKVEENMARKVEKLTDFIKEKAIFLKSFEFLDEEDFDFFVGSPLSNKERGEHISFSQALYSNYSDAVSYIQAYLKERDILYPRHIIENFLTLIRTNDLIILAGDSGSGKTNLVQSFAKAIGGVSKIIPVKPNWTSSEDLLGYYNPLEKKYLA…	H8L64_27005	gb|MBC4627833.1|	MEAPFVIKFIETKWHDKQTLVSVSESEYSLKLEQTGNNAFSAHTTIYPKVDELRFAQLAIKTKQGDQSPPYIAMPNGERRQLESITDPASNEEWWVEPAHWDAKQRVWRSEARRTAGQIMFVIGSSTLKLDIDISEQTKSDLSRYLSDFKADLWELILDESSHITGDAKNSQVAAIDQEALSLVASILSNAQTILKKPKVELKEIQALKPAKEVRPVPRTFMEICTKGSRKHLTSRASEPSYNVPENQYVLYVVSSTLSIVKQLVKVAESKKSRFSGAIEKLNERLDSLKDYRIINRDLVVKDLERLKKRFDTEVINAELSEQLAKINVNLSRSYSEKGYLRLEKATGSENEWWAKIKPSQNDDWQQFEPDGYTIFSSRDHYASLFKSYSDYEIEAKIP…	Klebsiella pneumoniae	Gammaproteobacteria
Gammaproteobacteria	Klebsiella pneumoniae	JACNSW010000031.1	H8L22_25380	gb|MBC4770805.1|	MALEQVIYNLEEVKGLSDEELYQRLYDSWGLENHKIDVWGELSINEAGNWAGIRNAKTLSGNQSIEYPLADSHELQSGVFLTPSVAKIVLGNDTKGMVACELMLASIPQRAKKNNPFLLAVNDKTVERLTYLPDALPNLDRQALIQNEDETLLRKVIYDAEVKRVKHKIASETEALEAALQEKQQDMTDKLAELSDAFKSTQDKITASTTELESSIKRNEELNNDNHRLNLKIQESKAELDVIIEKSRKVEESMARKVEKLTDFIKEKAIFLKSFGFLDEEDFDFFVGSPLSNKERGEHISFSQALYSNYSDAVSYIQAYLKERDILYPRHIIENFLTLIRTNDLIILAGDSGSGKTNLVQSFAKAIGGVSKIIPVKPNWTSSEDLLGYYNPLEKKYLA…	H8L22_25375	gb|MBC4770804.1|	MEAPFVIKFIETKWHDKQTLVSVSESEYSLKLEQTGNNAFSAHTTIYPKVDELRFAQLAIKTKQGDQSPPYIAMPNGERRQLESITDPASNEEWWVEPAHWDAKQRVWRSEARRTAGQIMFVIGSSTLKLDIDISEQTKSDLSRYLSDFKADLWELILDESSHITGDAKNSQVAAIDQEALSLVASILSNAQTILKKPKVELKEIQALKPAKEVRPVPRTFMEICTKGSRKHLTSRASEPSYNVPENQYVLYVVSSTLSIVKQLVKVAESKKSRFSGAIEKLNERLDSLKDYRIINRDLVVKDLERLKKRFDTEVINAELSEQLAKINVNLSRSYSEKGYLRLEKATGSENEWWAKIKPSQNDDWQQFEPDGYTIFSSRDHYASLFKSYSDYEIEAKIP…	Klebsiella pneumoniae	Gammaproteobacteria
Gammaproteobacteria	Klebsiella quasipneumoniae	JACNQD010000036.1	H8L37_26260	gb|MBC5069968.1|	MALEQVIYNLEEVKGLSDEELYQRLYDSWGLENHKIDVWGELSINEAGNWAGIRNAKTLSGNQSIEYPLADSHELQSGVFLTPSVAKIVLGNDTKGMVACELMLASIPQRAKKNNPFLLAVNDKTVERLTYLPDALPNLDRQALIQNEDETLLRKVIYDAEVKRVKHKIASETEALEAALQEKQQDMTDKLAELSDAFKSTQDKITASTTELESSIKRNEELNNDNHRLNLKIQESKAELDVIIEKSRKVEESMARKVEKLTDFIKEKAIFLKSFEFLDEEDFDSFVGSPLSNKERGEHISFSQALYSNYSDAVSYIQAYLKERDILYPRHIIENFLTLIRTNDLIILAGDSGSGKTNLVQSFAKAIGGVSKIIPVKPNWTSSEDLLGYYNPLEKKYLA…	H8L37_26265	gb|MBC5069969.1|	MEAPFVIKFIETKWHDKQTLVSVSESEYSLKLEQTGNNAFSAHTTIYPKVDELRFAQLAIKTKQGDQSPPYIAMPNGERRQLESITDPASNEEWWVEPAHWDAKQRVWRSEARRTAGQIMFVIGSSTLKLDIDISEQTKSDLSRYLSDFKADLWELILDESSHITGDAKNSQVAAIDQEALSLVASILSNAQTILKKPKVELKEIQALKPAKEVRPVPRTFMEICTKGSRKHLTSRASEPSYNVPENQYVLYVVSSTLSIVKQLVKVAESKKSRFSGAIEKLNERLDSLKDYRIINRDLVVKDLERLKKRFDTEVINAELSEQLAKINVNLSRSYSEKGYLRLEKATGSENEWWAKIKPSQNDDWQQFEPDGYTIFSSRDHYASLFKSYSDYEIEAKIP…	Klebsiella quasipneumoniae	Gammaproteobacteria
Gammaproteobacteria	Klebsiella quasipneumoniae	JACNQS010000036.1	H8L31_27515	gb|MBC5117742.1|	MALEQVIYNLEEVKGLSDEELYQRLYDSWGLENHKIDVWGELSINEAGNWAGIRNAKTLSGNQSIEYPLADSHELQSGVFLTPSVAKIVLGNDTKGMVACELMLASIPQRAKKNNPFLLAVNDKTVERLTYLPDALPNLDRQALIQNEDETLLRKVIYDAEVKRVKHKIASETEALEAALQEKQQDMTDKLAELSDAFKSTQDKITASTTELESSIKRNEELNNDNHRLNLKIQESKAELDVIIEKSRKVEESMARKVEKLTDFIKEKAIFLKSFEFLDEEDFDSFVGSPLSNKERGEHISFSQALYSNYSDAVSYILAYLKERDILYPRHIIENFLTLIRTNDLIILAGDSGSGKTNLVQSFAKAIGGVSKIIPVKPNWTSSEDLLGYYNPLEKKYLA…	H8L31_27520	gb|MBC5117743.1|	MEAPFVIKFIETKWHDKQTLVSVSESEYSLKLEQTGNNAFSAHTTIYPKVDELRFAQLAIKTKQGDQSPPYIAMPNGERRQLESITDPASNEEWWVEPAHWDAKQRVWRSEARRTAGQIMFVIGSSTLKLDIDISEQTKSDLSRYLSDFKADLWELILDESSHITGDAKNSQVAAIDQEALSLVASILSNAQTILKKPKVELKEIQALKPAKEVRPVPRTFMEICTKGSRKHLTSRASEPSYNVPENQYVLYVVSSTLSIVKQLVKVAESKKSRFSGAIEKLNERLDSLKDYRIINRDLVVKDLERLKKRFDTEVINAELSEQLAKINVNLSRSYSEKGYLRLEKATGSENEWWAKIKPSQNDDWQQFEPDGYTIFSSRDHYASLFKSYSDYEIEAKIP…	Klebsiella quasipneumoniae	Gammaproteobacteria
Gammaproteobacteria	Klebsiella quasipneumoniae	JACNQK010000039.1	H8L36_26675	gb|MBC5150583.1|	MALEQVIYNLEEVKGLSDEELYQRLYDSWGLENHKIDVWGELSINEAGNWAGIRNAKTLSGNQSIEYPLADSHELQSGVFLTPSVAKIVLGNDTKGMVACELMLASIPQRAKKNNPFLLAVNDKTVERLTYLPDALPNLDRQALIQNEDETLLRKVIYDAEVKRVKHKIASETEALEAALQEKQQDMTDKLAELSDAFKSTQDKITASTTELESSIKRNEELNNDNHRLNLKIQESKAELDVIIEKSRKVEESMARKVEKLTDFIKEKAIFLKSFEFLDEEDFDSFVGSPLSNKERGEHISFSQALYSNYSDAVSYIQAYLKERDILYPRHIIENFLTLIRTNDLIILAGDSGSGKTNLVQSFAKAIGGVSKIIPVKPNWTSSEDLLGYYNPLEKKYLA…	H8L36_26680	gb|MBC5150584.1|	MEAPFVIKFIETKWHDKQTLVSVSESEYSLKLEQTGNNAFSAHTTIYPKVDELRFAQLAIKTKQGDQSPPYIAMPNGERRQLESITDPASNEEWWVEPAHWDAKQRVWRSEARRTAGQIMFVIGSSTLKLDIDISEQTKSDLSRYLSDFKADLWELILDESSHITGDAKNSQVAAIDQEALSLVASILSNAQTILKKPKVELKEIQALKPAKEVRPVPRTFMEICTKGSRKHLTSRASEPSYNVPENQYVLYVVSSTLSIVKQLVKVAESKKSRFSGAIEKLNERLDSLKDYRIINRDLVVKDLERLKKRFDTEVINAELSEQLAKINVNLSRSYSEKGYLRLEKATGSENEWWAKIKPSQNDDWQQFEPDGYTIFSSRDHYASLFKSYSDYEIEAKIP…	Klebsiella quasipneumoniae	Gammaproteobacteria
Gammaproteobacteria	Klebsiella pneumoniae	JABEPZ010000031.1	HKB44_26940	gb|MBC9772077.1|	MALEQVIYNLEEVKGFSDEELYQRLCESWGITNGKLAVWGKILNGPDSDSRKLPTRLLEIKSLQTGLDTEYPINVRLTMDKGVFVSFKSVEELFGLEDGSFVSCELALAPQSEREKHENPFECNVVVSSVRRLIKLPEYTANDIIKGDENIFLDEAVYKQHLQNVQSRIDSEVTALNAEFEREESSLKAQISSYKDQLQHVQDDLNQKNNVLSQAIAKAQKLEVEHSEWQHKIALQKKAEETMSKKIERLKAYVESKAGFLKSFEFLDDDDFDLFVGSTLSNKDRDEHISFSQAFDSNYSDAVSYIQAHLKERDILYPRHIIENFLTLIRTHDLIILAGDSGSGKTNLVQSFAKAIGGVSKIIPVKPNWTSSEDLLGYYNPLEKKYLVTPFLEALIEAK…	HKB44_26935	gb|MBC9772076.1|	MEAPFVIKFIETKWHDKQTLVSVSESEYSLKLEQTGNNAFSAHTTIYPKVDELRFAQLAIKTKQGDQSPPYIVMPNGDRKQLESITDPASNAVWWVEPAHWDAKQRVWRSEARRTAGQITFVIGNSTLKLDIDISEQTKSDLSRYLSDFKADLWELILDENSHITGDAKNSQVAAIGQEALSLVASILSNAQTILKKPKVELKEIQALKPAKEVRPVPRTFMEICTKGSRKHLTSRASEPSYNVPENQYVLYVVSSTLSIVKQLVKVAESKKSRFSGAIEKLNERLDSLKDYRIINRDLVVKDLERLKKRFDTEVINAELSEQLAKINVNLSRSYSEKGYLRLEKATGSENEWWAKIKLSQNDDWQQFEPDGYTIFSSRNHYASLFKAYSEYEIEAKIP…	Klebsiella pneumoniae	Gammaproteobacteria
Gammaproteobacteria	Klebsiella quasipneumoniae	JACVMO010000042.1	ICC27_26895	gb|MBC9952893.1|	MALEQVIYNLEEVKGFSDEELYQRLCESWGITNGKLAVWGKILNGPDSDSRKLPTRLLEIKSLQTGLDTEYPINVRLTMDKGVFVSFKSVEELFGLEDGSFVSCELALAPQSEREKHENPFECNVVVSSVRRLIKLPEYTANDIIKGDENIFLDEAVYKQHLQNVQSRIDSEVTALNAEFEREESSLKAQISSYKDQLQHVQDDLNQKNNVLSQAIAKAQKLEVEHSEWQHKIALQKKAEETMSKKIERLKAYVESKAGFLKSFEFLDDDDFDLFVGSTLSNKDRDEHISFSQAFDSNYSDAVSYIQAHLKERDILYPRHIIENFLTLIRTHDLIILAGDSGSGKTNLVQSFAKAIGGVSKIIPVKPNWTSSEDLLGYYNPLEKKYLVTPFLEALIEAK…	ICC27_26900	gb|MBC9952894.1|	MEAPFVIKFIETKWHDKQTLVSVSESEYSLKLEQTGNNAFSAHTTIYPKVDELRFAQLAIKTKQGDQSPPYIVMPNGDRKQLESITDPASNAVWWVEPAHWDAKQRVWRSEARRTAGQITLVIGNSTLKLDIDISEQTKSDLSRYLSDFKADLWELILDENSHITGDAKNSQVAAIGQEALSLVASILSNAQTILKKPKVELKEIQALKPAKEVRPVPRTFMEICTKGSRKHLTSRASEPSYNVPENQYVLYVVSSTLSIVKQLVKVAESKKSRFSGAIEKLNERLDSLKDYRIINRDLVVKDLERLKKRFDTEVINAELSEQLAKINVNLSRSYSEKGYLRLEKATGSENEWWAKIKLSQNDDWQQFEPDGYTIFNSRDHYASLFKAYSDYEIEAKIP…	Klebsiella quasipneumoniae	Gammaproteobacteria
Cyanobacteriota	Coleofasciculus sp. FACHB-T130	JACJOG010000048.1	H6F70_19420	gb|MBD1880991.1|	MSKLAEGTDNRMTVSQDEPFKTNPLIFQLLTERLPGKIIKKFGIGHYKIKPLFTNLPLTDGTKVEEFVAFAHDVEDRELIPYKDYVTFSWHKPGERATDKDGQPGDPKAVEVKKVSQKEADGLAEEIRKNIADELRDELAKELTKLKQERESLAEREKEVTFKLNYLEPYGIQIPPQSENRSSAINEEITIPENLGTEWAEILNLNGMYVNEKIAKSYLLALITALYSGRFILLNGSVGVGKTSIVKHSARLLGGTSKIIPVRPAWLDPSDLLGFFDPINDIFRPATFLTALNEAKKKPDRLHLVCLDELNLAKIENYGADLLSTLEYSRSKENTDEEGLFLYSGDIWKALGKERKQLQDRNHEEKLDFKEIQRLERLDTLFEDYPASTFKIPNNLVFL…	H6F70_19425	gb|MBD1880992.1|	MNSSRLCFIDSKGRELEKNEDGIQHIRQYDERWCVRVQGADQGRVVLARSQPFPPFLLDKVAGSSNKWELPRKMSFEERKNVTGAGYITALLLDQTDSVLCEATLLVFPSNVTEQELDQMIKEIGQLALSTASCVYRSIEGGQGEACRIEGIGLQWYPGEGLLTTATSLLELAEVVKNNWNVLKKRPLKSFVTQVEPVSINRASFSPQSLIKAKVEPAKQKILGFARVESTQCPENEFICYVLDIYLKELANGLADSLESLDIETIDDSLIVQSNPKSRGDREFREFKEQSKNKAQCFNKQRKEGRQHIQDKISQLRDCATWATQVRDSAFLKTVNTPSELPSPSLRLSGSSAYGSIFTKFSNCKGNVLQPIQKVLYLFKCIYEDQVRTTWEIYELWCF…	Coleofasciculus sp. FACHB-T130	Cyanobacteriota
Cyanobacteriota	Trichocoleus sp. FACHB-832	JACJOM010000070.1	H6F53_13280	gb|MBD1906450.1|	MESHFDNLDDIKIWLLTLLQQELPGKVRIKRAQDITIHCLVPELPEKFIAYKGDVSSTDFVKFRWKNPGQCANDNIPEAIEVYPVDENEINALKDDIQKLLVPGIRRRLKKKLGEIRLIEEEAIQRAEELANSAKKDKEEADRLWAAIEPYHHAVPLLNQDKSPTTNNQFGHKWNQMLDSSGLLLPPCIKTSYLLALVSAFYSGSLILLNGSVGVGKTSLVEYSATLLGGKHSVIPVRPAWLDSSDLLGFFDPLSVTFRPTPFITALKDANKHPDRIHLVCLDELNLAKIENYGADLLSCLEYSRQKSLIDNKRGLLLYSESISEDLKSEFSELNILKKELQLDFKQTLRFKTLKTILDDYPANFYIPQNLVLIGTLNADETTYDLSPKVIDRSFVITY…	H6F53_13275	gb|MBD1906449.1|	MNYPSIDFVDDNGELPWQDGIQHIRQFGGRWRVRLQGEWQGGVAIDENSPLRLVKVPNKNDWVLPRNTTQQQQVLKELAGSAGQITAVLLDSSGKPIKDGTKATLAIAPANITDEQLDQLIREIGLLALSTSSHVAKEMSVSLGEESGNKTKGLEWVPGHGLLVTATALLRLASVVKENWATIEKRPLKSIVTEVAPVNVGRVNSSPQSLIKAKVQPANRRVLGITSVESTKCSENEFLCYILDVYLGDVAKGLAENLEKLLNSQLDIENNITCPRGLSGNSKESYDFIEMVKRRIEDFNTNKEEQRKYIGEKVQELKSCVEWAKQARKSGFIKEVDTPSKPPSLSQRLIGSPSYSLIFEKYSNSQGGLLPRIENVMYLLECTYHIKVRCTWEIYEIWC…	Trichocoleus sp. FACHB-832	Cyanobacteriota
Cyanobacteriota	Aphanizomenon flos-aquae FACHB-1171	JACJRO010000032.1	H6G12_13920	gb|MBD2391534.1|	MTENDEQEFNKLLAKSDSELIKDILEYNQISSLVLSGFLTVNPGSRYGYFKSVLDHNGRKIKYPNGDHIDYVFIYDPYELEKDERYYFECELEKNLKERRNRNNPYLLKTTVDRVQQGEKLNSLVKAIEEKNYEINELNQTIKYWEETIAQKITEISKNESFISELSEKIEFNKIQLDKIKNQKTEMENTIKILQQRINICRKLEFLNEEEERQYISLFREKYVIPSNYLSFENELESSFVKLADHVHQYLFHQKNLIYTRFQIRNFLTLLRTNDLIVLSGLSGSGKTQIVKAFAEALGGVAKIIPVKPNWTSSDDLLGYYNPIQMSFLPTPFTEAIVEAIHNPDQLYLICLDEMNLARVEYYFADFLSKLEERSNQPEIELYAKHEEELFISEFKTLL…	H6G12_13925	gb|MBD2391535.1|	MMKDFEVLMISVEWESRDKYLSITKSARPLKPTIKPANINTYEYDIVLYTQEDGKYFQFCVKTPHTPFLKGSDGKYHESLFNLKDDLWIIKREWEIGQRGIGYHHCPSINTIGQIEIGILDNFISIDINSNILDFDFEQLKNDFEGELWNLITSQKSEITSSRLELKYYDKIFRYSESKSIIDFLKAYDAIETKPKSELLTSKGIAKIEKVKPIAETYRKLVSIGGSARVLPSKTFIENYDIYENRYLCLMLNSIYKIVSNNINYTSKQLESLEFKINDKKAKIKVLNDPNPQVNQEEIIEEILLQEKKVQNMEEEWQNISRNMPFDSQQKFYTLSIYIKYKHKKSNSGFWCKTDKTPFCLINFPYACLNYLEEEQKYTFEFSFIKDRDIRVDKGKTYP…	Aphanizomenon flos-aquae FACHB-1171	Cyanobacteriota
Cyanobacteriota	Aphanizomenon flos-aquae FACHB-1290	JACJSR010000008.1	H6G29_04010	gb|MBD2556041.1|	MTENDEQEFNKLLAKSDSELIKDILEYNQISSLVLSGFLTVNPGSRYGYFKSVLDHNGRKIKYPNGDHIDYVFIYDPYELEKDERYYFECELEKNLKERRNRNNPYLLKTTVDRVQQGEKLNSLVKAIEEKNYEINELNQTIKYWEETIAQKITEISKNESFISELSEKIEFNKIQLDKIKNQKTEMENTIKILQQRINICRKLEFLNEEEERQYISLFREKYVIPSNYLSFENELESSFVKLADHVHQYLFHQKNLIYTRFQIRNFLTLLRTNDLIVLSGLSGSGKTQIVKAFAEALGGVAKIIPVKPNWTSSDDLLGYYNPIQMSFLPTPFTEAIVEAIHNPDQLYLICLDEMNLARVEYYFADFLSKLEERSNQPEIELYAKHEEELFISEFKTLL…	H6G29_04015	gb|MBD2556042.1|	MMKDFEVLMISVEWESRDKYLSITKSARPLKPTIKPANINTYEYDIVLYTQEDGKYFQFCVKTPHTPFLKGSDGKYHESLFNLKDDLWIIKREWEIGQRGIGYHHCPSINTIGQIEIGILDNFISIDINSNILDFDFEQLKNDFEGELWNLITSQKSEITSSRLELKYYDKIFRYSESKSIIDFLKAYDAIETKPKSELLTSKGIAKIEKVKPIAETYRKLVSIGGSARVLPSKTFIENYDIYENRYLCLMLNSIYKIVSNNINYTSKQLESLEFKINDKKAKIKVLNDPNPQVNQEEIIEEILLQEKKVQNMEEEWQNISRNMPFDSQQKFYTLSIYIKYKHKKSNSGFWCKTDKTPFCLINFPYACLNYLEEEQKYTFEFSFIKDRDIRVDKGKTYP…	Aphanizomenon flos-aquae FACHB-1290	Cyanobacteriota
Cyanobacteriota	Oscillatoria sp. FACHB-1406	JACJSM010000016.1	H6G50_15940	gb|MBD2579157.1|	MDTPLELETCLNRWIIPLLPKQLPGQVIRKLQNNILFISPLIDNLPLKDGTQATEFFAPNSVAEQGDYVTFEWEKPGERGIDRSKQQPGNPHAVKVRVISEQEAKVLATEVQEKIATHLREELKKELNQLQQQQVSLEQEIEKKVKEKTQEVEEKEIALNQRELEFKRQQELDRQQLHEDRSRLSLIHQERQDFLEGLERSIQASVDDSEKTRREAKELFDAVEPYRLAVPLEVQEQPIQPSEVLPFPQSLALQWQTILSKSGLFLPKNIEMSYLLALLSSCYSGSLLLLNGPVGVGKTSIIKTSAHLLGGSSKIIPVRPAWLDSSDLLGFFDPLSEIFRPSPFLTALKDAKIQPDRLCLVCLDELNLARIENYGADLLSALEYSRLHLNISSLNSDEH…	H6G50_15945	gb|MBD2579158.1|	MSYPKISFVNLKGTPFLPDENGITHIRQFGESWYVELDKPWRGEIILEGKSPFSLTQIPTTQRWELQGKLKGEIARRSGQVTVLLKDKAGKMLNETAATLHIYPASISEQQIEQAIADIGILAISTACCVQREMPVPMGEGSGVPGLGQKWQAGNGMLVTATALLELASVVRMNWSEIEKRPLKSFVTEIGTLEVEKAGISPRSLIEYKLNPFKRRVIGIKRTESFQCLENEFLCYILDFYLRDFAKGLAVAIGSLDSRNLENKFFEQKWHRKDEDFKEFVKAAKRRWRLFQSDREEFKRQAKDKISQLQDCVEWAEKARTSQFIKDIKTPTVPQLNSLRLIESSSYAPILDCYLNLKGGTLEPIQKVLHLLEQIYRGEVRPTWEIYEIWCVVKLYTAF…	Oscillatoria sp. FACHB-1406	Cyanobacteriota
Cyanobacteriota	Aphanizomenon sp. FACHB-1399	JACJSQ010000050.1	H6G31_17100	gb|MBD2633157.1|	MTENDEQEFNKLLAKSDSELIKDILEYNQISSLVLSGFLTVNPGSRYGYFKSVLDHNGRKIKYPNGDHIDYVFIYDPYELEKDERYYFECELEKNLKERRNRNNPYLLKTTVDRVQQGEKLNSLVKAIEEKNYEINELNQTIKYWEETIAQKITEISKNESFISELSEKIEFNKIQLDKIKNQKTEMENTIKILQQRINICRKLEFLNEEEERQYISLFREKYVIPSNYLSFENELESSFVKLADHVHQYLFHQKNLIYTRFQIRNFLTLLRTNDLIVLSGLSGSGKTQIVKAFAEALGGVAKIIPVKPNWTSSDDLLGYYNPIQMSFLPTPFTEAIVEAIHNPDQLYLICLDEMNLARVEYYFADFLSKLEERSNQPEIELYAKHEEELFISEFKTLL…	H6G31_17095	gb|MBD2633156.1|	MMKDFEVLMISVEWESRDKYLSITKSARPLKPTIKPANINTYEYDIVLYTQEDGKYFQFCVKTPHTPFLKGSDGKYHESLFNLKDDLWIIKREWEIGQRGIGYHHCPSINTIGQIEIGILDNFISIDINSNILDFDFEQLKNDFEGELWNLITSQKSEITSSRLELKYYDKIFRYSESKSIIDFLKAYDAIETKPKSELLTSKGIAKIEKVKPIAETYRKLVSIGGSARVLPSKTFIENYDIYENRYLCLMLNSIYKIVSNNINYTSKQLESLEFKINDKKAKIKVLNDPNPQVNQEEIIEEILLQEKKVQNMEEEWQNISRNMPFDSQQKFYTLSIYIKYKHKKSNSGFWCKTDKTPFCLINFPYACLNYLEEEQKYTFEFSFIKDRDIRVDKGKTYP…	Aphanizomenon sp. FACHB-1399	Cyanobacteriota
Cyanobacteriota	Aphanizomenon sp. FACHB-1401	JACJSS010000043.1	H6G30_15495	gb|MBD2643808.1|	MTENDEQEFNKLLAKSDSELIKDILEYNQISSLVLSGFLTVNPGSRYGYFKSVLDHNGRKIKYPNGDHIDYVFIYDPYELEKDERYYFECELEKNLKERRNRNNPYLLKTTVDRVQQGEKLNSLVKAIEEKNYEINELNQTIKYWEETIAQKITEISKNESFISELSEKIEFNKIQLDKIKNQKTEMENTIKILQQRINICRKLEFLNEEEERQYISLFREKYVIPSNYLSFENELESSFVKLADHVHQYLFHQKNLIYTRFQIRNFLTLLRTNDLIVLSGLSGSGKTQIVKAFAEALGGVAKIIPVKPNWTSSDDLLGYYNPIQMSFLPTPFTEAIVEAIHNPDQLYLICLDEMNLARVEYYFADFLSKLEERSNQPEIELYAKHEEELFISEFKTLL…	H6G30_15500	gb|MBD2643809.1|	MKDFEVLMISVEWESRDKYLSITKSARPLKPTIKPANINTYEYDIVLYTQEDGKYFQFCVKTPHTPFLKGSDGKYHESLFNLKDDLWIIKREWEIGQRGIGYHHCPSINTIGQIEIGILDNFISIDINSNILDFDFEQLKNDFEGELWNLITSQKSEITSSRLELKYYDKIFRYSESKSIIDFLKAYDAIETKPKSELLTSKGIAKIEKVKPIAETYRKLVSIGGSARVLPSKTFIENYDIYENRYLCLMLNSIYKIVSNNINYTSKQLESLEFKINDKKAKIKVLNDPNPQVNQEEIIEEILLQEKKVQNMEEEWQNISRNMPFDSQQKFYTLSIYIKYKHKKSNSGFWCKTDKTPFCLINFPYACLNYLEEEQKYTFEFSFIKDRDIRVDKGKTYPQ…	Aphanizomenon sp. FACHB-1401	Cyanobacteriota
Cyanobacteriota	Synechocystis sp. FACHB-383	JACJTJ010000057.1	H6G45_17525	gb|MBD2655250.1|	MKNELREILEELGNPQWILSFLPREIPGKIIKKLRNNDYFIEPLIPCPLEKGEFADQFYLPPISEPELKESDFVFFKWENLGKNDQGDPSNKKRKRNPRARLLRKISQDSIAQIEESIAKFGQDIQSDYLLQVNEYLSGVEKLQVDLELREKDLEAGKKELDDHKAQIDNQLKIIEPYRRFLPINEDEIDLDIPDFPEDLNTSWIRALSQSGISPSQSKALETSYLISLLSAAYSGSLVLLNGSVGVGKTNIVKKSAQILAGREAEIIPVRPGWLDPSDLLGFFDPIKEVFRPSPFLTALKNSSSNKNRFSLICLDELNLAKIENYASDLLSALEYSQAENAQGILLYSEDIQDDLLKECGNLASVESESLSPKEKIRLEQLTRLLNDYRAHFRIPPNI…	H6G45_17530	gb|MBD2655251.1|	MIYPTIKFINFAGKPLPLNDDKIPYVEQYGEKWFVDLGVEWSGGVAIEGEKLFQLKRQLKRHLWAPDPSLSGDITRRSGEITVFLTDEHGKIIESSKEKLKIYPANITEDQMKQMLREIGTLALTTTCCVRRKIEAPIIRENFVEAPWLNSYLATAQSLIELAELIKDLWSDIEKRPLKSIISTVDRLSVNEASYSPQLLIQKALKPGKKSFLGFTRVESLQCEENEFLCYVFDYYLGHLAFSIQEQLKSVEIKMQKNKNKFSLESCRRKDQDFLEFADRVLSSQSKKEIVIEKVEEVIKDLEKAIQWSKNIRNSSFLSQIQTPDRLKFSSQRLTESYTYGSIIKKLLFIYNEDYTKINILEKIFEVTQKIFYGRVKPTWEIYEIWCFIKLYSAFILNV…	Synechocystis sp. FACHB-383	Cyanobacteriota
Cyanobacteriota	Aphanizomenon flos-aquae FACHB-1265	JACJTN010000027.1	H6G38_13365	gb|MBD2658092.1|	MTENDEQEFNKLLAKSDSELIKDILEYNQISSLVLSGFLTVNPGSRYGYFKSVLDHNGRKIKYPNGDHIDYVFIYDPYELEKDERYYFECELEKNLKERRNRNNPYLLKTTVDRVQQGEKLNSLVKAIEEKNYEINELNQTIKYWEETIAQKITEISKNESFISELSEKIEFNKIQLDKIKNQKTEMENTIKILQQRINICRKLEFLNEEEERQYISLFREKYVIPSNYLSFENELESSFVKLADHVHQYLFHQKNLIYTRFQIRNFLTLLRTNDLIVLSGLSGSGKTQIVKAFAEALGGVAKIIPVKPNWTSSDDLLGYYNPIQMSFLPTPFTEAIVEAIHNPDQLYLICLDEMNLARVEYYFADFLSKLEERSNQPEIELYAKHEEELFISEFKTLL…	H6G38_13370	gb|MBD2658093.1|	MMKDFEVLMISVEWESRDKYLSITKSARPLKPTIKPANINTYEYDIVLYTQEDGKYFQFCVKTPHTPFLKGSDGKYHESLFNLKDDLWIIKREWEIGQRGIGYHHCPSINTIGQIEIGILDNFISIDINSNILDFDFEQLKNDFEGELWNLITSQKSEITSSRLELKYYDKIFRYSESKSIIDFLKAYDAIETKPKSELLTSKGIAKIEKVKPIAETYRKLVSIGGSARVLPSKTFIENYDIYENRYLCLMLNSIYKIVSNNINYTSKQLESLEFKINDKKAKIKVLNDPNPQVNQEEIIEEILLQEKKVQNMEEEWQNISRNMPFDSQQKFYTLSIYIKYKHKKSNSGFWCKTDKTPFCLINFPYACLNYLEEEQKYTFEFSFIKDRDIRVDKGKTYP…	Aphanizomenon flos-aquae FACHB-1265	Cyanobacteriota
Cyanobacteriota	Aphanizomenon flos-aquae FACHB-1249	JACJTM010000041.1	H6G43_16310	gb|MBD2686746.1|	MTENDEQEFNKLLAKSDSELIKDILEYNQISSLVLSGFLTVNPGSRYGYFKSVLDHNGRKIKYPNGDHIDYVFIYDPYELEKDERYYFECELEKNLKERRNRNNPYLLKTTVDRVQQGEKLNSLVKAIEEKNYEINELNQTIKYWEETIAQKITEISKNESFISELSEKIEFNKIQLDKIKNQKTEMENTIKILQQRINICRKLEFLNEEEERQYISLFREKYVIPSNYLSFENELESSFVKLADHVHQYLFHQKNLIYTRFQIRNFLTLLRTNDLIVLSGLSGSGKTQIVKAFAEALGGVAKIIPVKPNWTSSDDLLGYYNPIQMSFLPTPFTEAIVEAIHNPDQLYLICLDEMNLARVEYYFADFLSKLEERSNQPEIELYAKHEEELFISEFKTLL…	H6G43_16305	gb|MBD2686745.1|	MMKDFEVLMISVEWESRDKYLSITKSARPLKPTIKPANINTYEYDIVLYTQEDGKYFQFCVKTPHTPFLKGSDGKYHESLFNLKDDLWIIKREWEIGQRGIGYHHCPSINTIGQIEIGILDNFISIDINSNILDFDFEQLKNDFEGELWNLITSQKSEITSSRLELKYYDKIFRYSESKSIIDFLKAYDAIETKPKSELLTSKGIAKIEKVKPIAETYRKLVSIGGSARVLPSKTFIENYDIYENRYLCLMLNSIYKIVSNNINYTSKQLESLEFKINDKKAKIKVLNDPNPQVNQEEIIEEILLQEKKVQNMEEEWQNISRNMPFDSQQKFYTLSIYIKYKHKKSNSGFWCKTDKTPFCLINFPYACLNYLEEEQKYTFEFSFIKDRDIRVDKGKTYP…	Aphanizomenon flos-aquae FACHB-1249	Cyanobacteriota
Gammaproteobacteria	Klebsiella pneumoniae	JACXRV010000037.1	ID159_26725	gb|MBD3106629.1|	MALEQVIYNLEEVKGLSDEELYQRLYDSWGLENHKIDVWGELSINEAGNWAGIRNAKTLSGNQSIEYPLADSHELQSGVFLTPSVAKIVLGNDTKGMVACELMLASIPQRAKKNNPFLLAVNDKTVERLTYLPDALPNLDRQALIQNEDETLLRKVIYDAEVKRVKHKIASETEALEAALQEKQQDMTDKLAELSDAFKSTQDKITASTTELESSIKRNEELNNDNHRLNLKIQESKAELDVIIEKSRKVEENMARKVEKLTDFIKEKAIFLKSFEFLDEEDFDFFVGSPLSNKERGEHISFSQALYSNYSDAVSYIQAYLKERDILYPRHIIENFLTLIRTNDLIILAGDSGSGKTNLVQSFAKAIGGVSKIIPVKPNWTSSEDLLGYYNPLEKKYLA…	ID159_26720	gb|MBD3106628.1|	MEAPFVIKFIETKWHDKQTLVSVSESEYSLKLEQTGNNAFSAHTTIYPKVDELRFAQLAIKTKQGDQSPPYIAMPNGERRQLESITDPASNEEWWVEPAHWDAKQRVWRSEARRTAGQIMFVIGSSTLKLDIDISEQTKSDLSRYLSDFKADLWELILDESSHITGDAKNSQVAAIDQEALSLVASILSNAQTILKKPKVELKEIQALKPAKEVRPVPRTFMEICTKGSRKHLTSRASEPSYNVPENQYVLYVVSSTLSIVKQLVKVAESKKSRFSGAIEKLNERLDSLKDYRIINRDLVVKDLERLKKRFDTEVINAELSEQLAKINVNLSRSYSEKGYLRLEKATGSENEWWAKIKPSQNDDWQQFEPDGYTIFSSRDHYASLFKSYSDYEIEAKIP…	Klebsiella pneumoniae	Gammaproteobacteria
Epsilonproteobacteria	Campylobacterales bacterium	JACXTV010000149.1	IE909_09745	gb|MBD3842151.1|	MNYYTKSQLADSDINDEDLLNTLKTSWGFEPNEPIEVLCELKGNKSSEGFTHYRVYNVKSVKDMHILTYPISDLVPKDDIPSDGIYVGPSFDNKIKSFLNKNGKILVACSLELSDKSERIKHDNPLLVNVTPSSIKVYTTIDESFLIRDNEKILINESVYNSIEFKYQKEIKRFENQIKEHEKKLSQELTKLDEEFESKQNEVTLQIEELSKKYSTEEEKLQKKIDVQEKTLKRLEENKLLVINEIKEKQQEKSQLISLIDELKIELERIEETMAKKLEKFRSFIKEKAEQLKNLEFIDEEEYNDLMMIKKENQEENGEPVKSISFKDDLDLDYQKAISHIHSYLFNQDIIYPRYIIEDFMALIQTNDLIVLAGESGSGKTNLIKSFAKAIGGKSFIIP…	IE909_09750	gb|MBD3842152.1|	MQPIFEAKYLAIKWSDKNTVSSITEAMNTIPIEVENTTSYYMEVQAYSRENGLDMQVGFRILDTQNDIKPYVLNAKGDKIYLYKIKEDWWIERSSWKEEKNKDSYWTSELWNHAGETQVYFGNIACHIDIRAISFTTEQLNLYLEDFKNDFWWLILKKNSFTQAEARNSNDQIKILNKETINLIQEFIKHIQNILKNPKKELKETQRIKDIKKVKPVAKTFMEIATRGMKRKMTSRDAIESFNVAENRYIHYALYQVYTMVRNMTKASQYVNNFYQSKIKSKQQRVEQLKDVKTINKEVVATTIKTLQEKINKIKNTFENIEDKQETECYKEVNTPINKAIQNQPFQQNNIEQFQQFHIKLERRQSDYQNKIQFFGKVKYPGEENWHGIETNDLFSLEF…	Campylobacterales bacterium	Epsilonproteobacteria
Gammaproteobacteria	Pseudoalteromonas lipolytica LMEB 39	AQHA01000036.1	PLIP_b0664	gb|MBE0353118.1|	MNEVIYSKEELEDLSEAELLDILKQSWGVNDNKIEVWGELPALGDTTFGFLRNPHLVSTGDRLYYPVQGVEIEPCSFFMAPQDASSCGSKKHKRFVRCELELSPESERRKHRNPLSLCVKSGTGENLRYLPKEIPLEILTNPNSEEEISQLISKSIYDFYHEKAMGDLDELVKKEQSEFELKMAQKERDATQSLEIIKDKIQENEEKRDTAIKLVEKLNSKQIELDKTISKLAQDKATKQTEIQTLVASYTRIEAEMNNKIKRLKEYVADKALFLKTFEFIDEEVLELFIQESQPSSVQVEGISFNDILNGDYQQAVSYIQSYLVSQDILYPRHIIENYMTLLRTKDLVILAGDSGSGKTNLVKSFAKAVGGKSIIVPVKPNWTSSEDLLGYYNPLEKK…	PLIP_b0665	gb|MBE0353119.1|	MKPQFEIKYIELQWYDKNTLVKVTESLNALRVEYDSVNQCFTTETTIYPKLDEIKRGQLAVRVLNVEAGQPYINLPNNDKKLLTQIKDPDTGIYWWILKEKWISEQKQWFGIAPNIVGTLKFYITSQLCEVEINGSDFSVEQLEQYLRVFKNDLWELILDDSSAVQANAKQTNGIGVSEEIIECISKIVNAAQKILETPKVELREIQAIKPRKLVKPVNRTFMELVSKSNQRFLTSRATQPSYNVPENRYILFALERCGRVLKQIVILAQNKSQRFLDTTNKLREQLHSFTTSVKVNRELVVKDLERVRERTKLEYWQNKLNLKIKDNNIQLKTTKCSLDLYLHLENKTQQKDGFFILIWNGESWGKPDNKSGILSLRNRYQVLLEVLEPGETLKFNCD…	Pseudoalteromonas lipolytica LMEB 39	Gammaproteobacteria
Gammaproteobacteria	Methyloprofundus sp.	JACUUF010000188.1	IBX55_19455	gb|MBE0471673.1|	MNKVIYTHEELSKLNDSEIFELLLEAWEINGEEIEIWGELPRLNNSTFGFLTNPYLIKSGMRLYYPLETVKSEVCRFFVSPKIASAYGSKNHSTFIRCTLEFSPISERKKHNNPFLLCVSDAHCENLELLPKNIPQEIISDNEKNSFISKSIYDFYYFKAIKEAEDEILKKKKALEEECGQISRKTKKEIADAKEALAEEEKKLDQAKQISINLKKNKDQLEIKIKKLELEKLDQQEKIQQLIEEYEKIEYEMNKKIERLRKFISEKKNFLQSFEFIDEEDFQHFLLEPSSEINPINGVCFHETLQGNYKESISYIQAYLVEQDILYPRHIIENYLTLLRTRDLIILAGDSGSGKTNLVKSFAQAVGGKSIIIPVKPNWTSSEDLLGYYNPLEKKYLST…	IBX55_19450	gb|MBE0471672.1|	MDEFFSIKYLEIDWYDRITITKITESLNELCVDYNSIDKVYEAETTIYPKAEGVKNGHLALRLLDDRAITPCIKNASGKLIPLKKIKDIDNNKYWWILADHWDENKKQWKGLAPNIAGTLTLVLGEHLCKISIGSMDFTRENLESYLRSFKNDLWELILDESSHVTAELKNSTHFGVNENIINCIKNLAISAEKIIKSPKVELRETQLIKPRKQVKPVNRTFMELATRESQRFLTSRATTPSFNVPENQYFLFVLERCFKIINQISIIAKSKARRYRDTVKKLTYQHDSLKPFIKINEKLAYEELTQIEKRAHIDYWKSEFNRKVKESGFVFSEHSFSANYSFKITGVTNKLDFFVEVKNPDTQVFEKPYEKTGILSLKNNFYFLHDVLIPTMIVTLNC…	Methyloprofundus sp.	Gammaproteobacteria
Gammaproteobacteria	Vibrio parahaemolyticus	JABCCB010000003.1	HJ032_10735	gb|MBE4365707.1|	MDDNKLTFDKNYAKQLDDKDLYKCLFDAWGVQNEKIQVWGRLETNAQGNWAGIKQAKLIQNNEPIEYPLPNNRELQSGVFLSPNEARSFLIGKHSAYIRCELKLASPQQRKIKDNPFLLSIIPASVELLTELPKFGADDLLQSEFSTFLSEQVYQYYLNSLETKTRIAEKDMQSKLEELENEHEKVKRDFAEQQITAKEETRSQIDEIEAEYKERKQELTAQTKEVEKKLTGLKAERESIKTQLSALEIETNTVKSNIEQEQLALKAIIEKQQQIEDEMSKKIERLKQYVEEKAGFLKDFEFIDEDVFADLSGNKPARGDLVLGLSFVDDFGSDYSQLTSYLQAYLKEQGQYYSRHIIENYLTLIRTNDLVILAGDSGSGKTSLVQSFAQAVGGVAKII…	HJ032_10740	gb|MBE4365708.1|	MSNANFVIKYIETRWHDKATLLEVTESQYPLSLDEVSYDSFEAFTTIYPNVEDLYRSQIAITYSDRLCSAPPAIILSDGLTMPLKKIVHPENGKVWWVEPGEWNPKSKEWRNNTHRTAGVINFRIEKQTLELHITLSDASKDQLDKYLVDFKSDMWELILDESSYVQGDTKRSIVGSVDETLLKLVDSLLSAARNVLKKPKSELREIQTLKPRKAVKPVPRTFMEIATKGNTRVLTSRGSKPNFNVSENSYVLYALMATQRIVSQLCRVSQSKTERLSHNLQKLDQRLESLKDYKEVNRDLVVKDYKMALRAVSIDNINHSIHQQLVEINSGYSSSGHSDGFLKVQKLTDKGDGYFCELKYNLNEPWGRLESARTMILSLKDNYLPLFKPYSEYRLCAR…	Vibrio parahaemolyticus	Gammaproteobacteria
Cyanobacteriota	Sphaerospermopsis sp. LEGE 08334	JADEXH010000018.1	IQ237_12165	gb|MBE9056773.1|	MENTIKILQQKINICLNLEFLSEDEERQYISLSREKYVIPSNYLSFDNELESNFAQLADHLHQYLFHQKNLIYTRFQIRNFLTLLRTNDLIVLSGLSGSGKTQIVKAFAEALGGVAKIIPVKPNWTSSDDLLGYYNPIQMSFLPTPFTEAIVEAIHNPDQLYLICLDEMNLARVEYYFADFLSKLEERSSQPEIELYAKHEEELFISEFKTLLNLLENSAKDIKIKSWQDFLNNDEARTRFLEIFGNNEKESLLQLHTKTKRRLMDILKFPSTIKIPNNVRFIGAINVDETTNYFSPKILDRVHIVKFENPLLYEKKVKTFFDNSEYDLKLEPVYVNPVVFSQREEYPKMDDSYISRNLKEINEKFLLPLNIDFGVRSIRQSLNYAKFNQQVYENYGNN…	IQ237_12170	gb|MBE9056774.1|	MKDFEVLMISIEWESRDKYLSITKSARPLKPTIKPGNINTYEYDIVLYTQEDGKYFQFCVKTPHTPLLKGSDGKYHNSLFNLKDDLWIIKGEEWEIGQRGIGYHPCPSINTIGKIEIGIFQDLDKLTDTIIIDVNSNIQDFNFEQLKNDFEGELWNLITSKKSPITSSRLELKYYDKIFRYSESKSIIYFLKAYDAIEKTPKSELLTSKGIAKIEKVKPIAETYRKLVSIGGSARVLPSKTFIENYDIYENRYLCLMLNSIYKIAQVWIYYAQTKFYR	Sphaerospermopsis sp. LEGE 08334	Cyanobacteriota
Cyanobacteriota	Cuspidothrix issatschenkoi LEGE 03284	JADEWD010000031.1	IQ231_07615	gb|MBE9231554.1|	MTENDEQELNKLLAKPGSELIKDILEYNQISSLVLSGVLTVNPGSRYGYFKSVVDHNGRKIKYPNGDDIDEVFIYDPYELEKGERYYFECELEKNINERRKRNNPYLLKTTVDRVQQGEKLNSLVKAIEEKNYEINELNETIKYCEETIAQKITEISKNESFISELSEKIESNKIQLDQIINQKTEMENTIKILQQKINICRKLEFLNEDEERQYISLSREKYVIPSNYLSFENELESSFAKLANHVHQYLFCEKNLIYTRFQIRNFLTLLRTNDLVVLSGLSGSGKTQIVKAFAEALGGVAKIIPVKPNWTSSDDLLGYYNPIQMSFLPTPFTEAIVEAIHNPDQLYLICLDEMNLARVEYYFADFLSKLEERSNQPEIELYAKHEEELFISEFKTLL…	IQ231_07620	gb|MBE9231555.1|	MMKDFEVLMISIEWESRDKYLSITKSVRPLKPTIKPGSINTYEYDIVLYTQEDGKYFQFCVKTPHTPLLKGSDGKYHDSLFNLKDDLWIIKGEEWEIGQRGIGYHHCPSINTIGKIEIGIFQDLDKLTDTIIIDVNSNIQDFDFEQLKNDFEGELWNLITSQKSKITSSRLELRYYDKIFCYSESKSIIDFLKAYDAIEKKPKSELLTSKGIAKIEKVKPIAETYRKLVSIGGSARVLPSKTFIENYDIYENRYLCLMLNSIYKIVSKNVHFSDRQKQKLMSDIESREETILKLKDPFIKVDADLLLSEISEKESDFQIWRQNWEINRNIFLSKYKGVGDNFYYAKIQVVSKSVFRGTISWWVNCCWQKDDLTNKQEEFCVFEFNEDTNSILEEGKLME…	Cuspidothrix issatschenkoi LEGE 03284	Cyanobacteriota
Gammaproteobacteria	Klebsiella pneumoniae	JADRQD010000037.1	I4176_26345	gb|MBG1817595.1|	EKHENPFECNVVVSSVRRLIKLPEYTANDIIKGDENIFLDEAVYKQHLQNVQSRIDSEVTALNAEFEREESSLKAQISSYKDQLQHVQDDLNQKNNVLSQAIAKAQKLEVEHSEWQHKIALQKKAEETMSKKIERLKAYVESKAGFLKSFEFLDDDDFDLFVGSTLSNKDRDEHISFSQAFDSNYSDAVSYIQAHLKERDILYPRHIIENFLTLIRTHDLIILAGDSGSGKTNLVQSFAKAIGGVSKIIPVKPNWTSSEDLLGYYNPLEKKYLVTPFLEALIEAKQNPDIPYFICLDEMNLARVEYYFADFLSKLEERNEQPTIQLYSDDEAAHVLAELKGVVSVISNAQEKFSKNGIVDFVALMQDEEINAEMKRAFGFSDKDSLIKYHGDIRRMLAG…	I4176_26350	gb|MBG1817596.1|	MEAPFVIKFIETKWHDKQTLVSVSESEYSLKLEQTGNNAFSAHTTIYPKVDELRFAQLAIKTKQGDQSPPYIVMPNGDRKQLESITDPASNAVWWVEPAHWDAKQRVWRSEARRTAGQITFVIGNSTLKLDIDISEQTKSDLSRYLSDFKADLWELILDENSHITGDAKNSQVAAIGQEALSLVASILSNAQTILKKPKVELKEIQALKPAKEVRPVPRTFMEICTKGSRKHLTSRASEPSYNVPENQYVLYVVSSTLSIVKQLVKVAESKKSRFSGAIEKLNERLDSLKDYRIINRDLVVKDLERLKKRFDTEVINAELSEQLAKINVNLSRSYSEKGYLRLEKATGSENEWWAKIKLSQNDDWQQFEPDGYTIFNSRDHYASLFKAYSDYEIEAKIP…	Klebsiella pneumoniae	Gammaproteobacteria
Gammaproteobacteria	Pseudoalteromonas sp. NZS71	JADYWS010000012.1	I6E85_09780	gb|MBH0061446.1|	MADETYEADNDVLSNESLLGEPVKYSLDVVKDLSDEELYQRLFKCWGIKNKKIEVWGELTKQDGAVPYRLKHVRNIIDNKLIEYPIDVSYGLQSGIFVYPSIGNKYYITDQRTFVRGKLILTKLSERIKHGNPFELNLSSDDIEPLEQLPIAINEIDRLSNIDKSIVLGEGTERFIDKVIYEQQLSKLKTEFEETQKSEIETHLSRLNSMTRAVSIEKVELHAIKDSVESSKKENQQLGSESKLLRQSIEKKEHELAILDDKYKGLEEVMAKKIEKLKAFIEEKAVFLKSFEFIDDDEFNSFVSNITKVSERPEHIEFSDHLNGDYQQAVSYIQAYLKERDILYPRHIIENYLTLIRSNDLIILAGDSGSGKTNLVNSFADAVGGKSIIIPVKPNWTSS…	I6E85_09775	gb|MBH0061445.1|	MKAEFEAKYIDITWYDKNTVLSITESLLPLDCEYEVDKYICSTVIYPKTEGIECGQLAFRFLKKSTIKPYFVNGAGEKIVLKCVLDTETLKEWWIEADSWSNKSKRWQGKAHRTAGSIKVYLAHEVCQVNIGSYDFTLEQLDTYLADFKSDLWELILDEQSYVKGKGKTVNDGVVTQDTIALVNNLLSHSQNILKNPKAELREVQTLKPRKAVKPVNRTFMELATKGGSKLLTSRSTEPSYNVPENRYILYVLERLYKIIKQLVAISQNKTKRYESNIVKLGSRLEAFVEDKLIDKDLVKKDLEKLRDSFNTKFLSANLQEKLELFNQRGLEEQNTSICFLKIGSKTKGGDSRFLAIKKEYSDNWFETEVATQNVFLKQGEPLFLNLLEQGFEYKIMGN…	Pseudoalteromonas sp. NZS71	Gammaproteobacteria
Gammaproteobacteria	Pseudoalteromonas sp. NZS11	JADYWP010000004.1	I6E82_11075	gb|MBH0080180.1|	METDNTQPLLTIAEAQALSDDDLLQVLKAHWQIESDELLVWGELIEINTAEDTFIKLTNVKAVNQTQLLTYPVDIPTQHDIPRRGVFLSSKVAREFYTEKGVRWIACAVELSEAKEREKHNNPFILKVQPSSIKPLIELSELKDEQHQWGYITEGIIEHVSNINKDLLDQKNASLIEDVNIKEQQIKAIESGIASVQQQKDSATEQLIKAQKALESVKGKEIEMKQSLSELTRYIEQKTRVLEQLDLIDKVDESSKVEEEDEGEHLNFSSDFNSDYSLVSQYIQANLAENGFLYPKEIVDNFITLLRCNDLIVLAGDSGAGKTSLVKAFAKAIGGVAKIIPVKPNWTGSEDLVGYYNPIEKKYISTPFLDALIEARDNPTKPYLICLDEMNLAKVEYYF…	I6E82_11080	gb|MBH0080181.1|	MNFEARFINIRWRDKTHVGSVKLSAQPIDVESVGKGEYCADIISYSTLNDDKSEFGQFAVRPLNNVEFTPFIINGTDKLPLQPVVDFKTGLTWWVEKDKWDKDRNQWQSRMLTGVGSVILSLGSEELELRVAASTFTYEQLDRYLSDFKLDFSELLLDDESYLTSRGKLDNLVLNEDIFKTLDTFVESITAIVANPKVDLIETLSPQPRGRVRPTNKTFIEYIKNPYAKSYSGRVATPTTDNAENRYAHFMLKQTVFMLGVIKNIAQQQYDTDSRKVTSYQSRIDGVSPYVLVNAEAVVNAISRLKEQRNQMESRLGNFNKSLSKNNLTANKELFVHLTGQFGDSKNLFFAKIKSSANKPWHDGKLNGLDGYNLVLFSVKVPVEIGCVYRIVGNWQYDK…	Pseudoalteromonas sp. NZS11	Gammaproteobacteria
Gammaproteobacteria	Proteus mirabilis	JAEHQV010000019.1	JEP46_16345	gb|MBI6336791.1|	MAEETTHYLLEELAGFSDQQLLETLKRSWRYDPQKPLEIIGKLKKITIDTKFFYILEELHSTHDGSALVYPLQREDIHHTVFVGTIKEYSVESGSWVKVSVTLSPENERVKRNNPFSLMVEYGSVSLLSELPGSADNNQYFIDGKFHVENWIVDFYLSKNNKKIQEDEARLLEQFAQEKSQVEQKIHSLSMTEQSLANKVNKSQQELAKNTQSLENLQAEMAKQQREFSKQQTELEYKLNKLTEYVKNTASMLLDLDLISQADVDTLLGQSKVSERLIGHDFKTVFDSDKKLAVGYIQAFMYKKDIMYQRSVLEDFFALVCTNDLIVLAGDSGSGKTNLVKSFAEAIGGKAIIIPVKPNWTSAEDLLGYYNPLEQKYLTTPFLDALFEAKQNPDIPYFI…	JEP46_16350	gb|MBI6336792.1|	MESIDIRYIDIVWNSDRSVLKVETSSHPIEIERVEQHWVGNTVAYPQKYFYIGICIADKLIYEPYLKLPNDGSYPLMPIKVPGEDKIWWVQKGNWDTKHNKYFSTIYHTAGRVEISVQNETLILENHTVNFSIADLEYYLSDLKNKLWMLILDNKNASKIKIQNEAPSIFSEDIVKLFGELTSSFEAIVKKPHVILSEVQEKLPKRLVKPVAKTFREIVTQPHSKRLTSRSYKESYDIPENRFVHYLMQRTLYLLNTLSRLAYHQVNAMHDRVERDEHWLKTESRKETKVVDPVVFDNEIQAITSDLEKQRLMLNNAIKAQQINRGDENFIGQTYTVTLNNTYGKSDTDYFVLSLNGKIVSQDFDTYVVFSSGINFKELFNDKYLTTYEFRITGSGKKY…	Proteus mirabilis	Gammaproteobacteria
Bacillota	Bacillus cereus group sp. N14	JAEHBQ010000029.1	JDS82_26235	gb|MBJ8084635.1|	MVQSIAKDSFAKEEVQNYEDALNSLKYFLLEDNAEIKVEQIDTVYEFLSHSTNTKRQDKQLFAHYLQDIPPEEVKKMKMVLKKLKKGIKEDTQGPVEESKKKLIEYGVLNFCSAFLTKPLLHEEKEMIENNLKDSKMKTTINQTHLHNKEPKSYDEWLSTEAAQVVTELRTAEENNELSALHVNKFIKLFKKYSQGRLLFRINGYIQTEETVRIYGTPMEWTNEGIVPLNHPWKIEEWSISRNNIKAHRVAHLKQNDLVLVNFSGTQNTHFLASLLFIDFTTAEVVPLSLEQSLQEIGGTAFVKQLKDNMNVNTSEEIEAIIIQRLLNVNQELKNQLEKEQREFLLQQQKLSEEQQMWRRIFYKIEQTIAFEQKEEKIDEVQIHPYNEETFCKQVQALL…	JDS82_26230	gb|MBJ8084634.1|	MKIIHIVLKDSEIQAYDELTKSEGIFLANEYTKKDKMTAQIGVIEPAASKVLIEQFKQPVATLTKDTKTNIWYHKPSKWLADGFEQSTDSIFGINAGGSFDIVAYDVDNLELARAQVIITPGTISIKEYAFMQQEVRRLFELFSYDLARESIDNKNILKQTQTKLFNVYKMEEILNEFSDWFLQLVQQPAEQLIHTTKKVALIQLKKWTPKVILEQTLRPDHKVRANVIEKSTAIVEHGMLRLMLEQIKQRIDCESQAEEILINELTDEIVQLSQIIKDKTNQLQEAILALQQVVKQDLITLKARKSIWFQLNSNVQKWLDEPLMDVSPVEIEETHVFSMNPVYSAVYDSYLKFNELQPKLFEAIRPFIQSILKSPTLYEIWIFLKITQQLHQWGVNTD…	Bacillus cereus group sp. N14	Bacillota
Gammaproteobacteria	Citrobacter freundii	JADVJV010000017.1	I5532_24705	gb|MBJ9635834.1|	MALEQVIYNLEEVKGLSDEELYQRLYDSWGLENHKIDVWGELSINVAGNWAGIRNAKTLSGNQSIEYPLADSHELQSGVFLTPSVAKIVLGNDTKGMVACELMLASIPQRAKKNNPFLLAVNDKTVERLTYLPDALPNLDRQALIQNEDETLLRKVIYDAEVKRVKHKIASETEALEAALQEKQQDMTDKLAELSDAFKSTQDKITASTTELESSIKRNEELNNDNHRLNLKIQESKAELDVIIEKSRKVEESMARKVEKLTDFIKEKAIFLKSFEFLDEEDFDFFVGSPLSNKERGEHISFSQALYSNYSDAVSYIQAYLKERDILYPRHIIENFLTLIRTNDLIILAGDSGSGKTNLVQSFVKAIGGVSKIIPVKPNWTSSEDLLGYYNPLEKKYLA…	I5532_24700	gb|MBJ9635833.1|	METPFVIKFIETKWHDKQTLVSVSESEYSLKLEQTGNNAFSAHTTIYPKVDELRFAQLAIKTKQGDQSPPYIVMPNGDRKQLESITDPASNAVWWVEPAHWDAKQRVWRSEARRTAGQITFVIGNSTLKLDIDISEQTKSDLSRYLSDFKADLWELILDENSHITGDAKNSQVAAIDQEALSLVASILSNAQTILKKPKVELKEIQALKPAKEVRPVPRTFMEICTKGSRKHLTSRASEPSYNVPENQYVLYVVLSTLSIVKQLVKVAESKKSRFSGAIEKLNERLDSLKDYRIINRDLVVKDLERLKKRFDTEVINAELASQLGEINANKYFSQNHAAKGYLRLEKTTGSENEWWAKIKPSQHDDWQQFELDGYTIFSSGEYYASLFQPYSDYDMVAI…	Citrobacter freundii	Gammaproteobacteria
Gammaproteobacteria	Klebsiella pneumoniae	VHTZ01000033.1	FKL39_25855	gb|MBK2522197.1|	MALEQVIYNLEEVKGLSDEELYQRLYDSWGLENHKIDVWGELSINEAGNWAGIRNAKTLSGNQSIEYPLADSHELQSGVFLTPSVAKIVLGNDTKGMVACELMLASIPQRAKKNNPFLLAVNDKTVERLTYLPDALPNLDRQALIQNEDETLLRKVIYDAEVKRVKHKIASETEALEAALQEKQQDMTDKLAELSDAFKSTQDKITASTTELESSIKRNEELNNDNHRLNLKIQESKSELDVIIEKSRKVEESMARKVEKLTDFIKEKAIFLKSFEFLDEEDFDFFVGSPLSNKERGEHISFSQALYSNYSDAVSYIQAYLKERDILYPRHIIENFLTLIRTNDLIILAGDSGSGKTNLVQSFAKAIGGVSKIIPVKPNWTSSEDLLGYYNPLEKKYLA…	FKL39_25850	gb|MBK2522196.1|	MEAPFVIKFIETKWHDKQTLVSVSEPEYSLKLEQTGNNAFSAHTTIYPKVDELRFAQLAIKTKQGDQSPPYIAMPNGERRQLESITDPASNEEWWVEPAHWDAKQRVWRSEARRTAGQIMFVIGSSTLKLDIDISEQTKSDLSRYLSDFKADLWELILDESSHITGDAKNSQVAAIDQEALSLVASILSNAQTILKKPKVELKEIQALKPAKEVRPVPRTFMEICTKGSRKHLTSRASEPSYNVPENQYVLYVVSSTLSIVKQLVKVAESKKSRFSGAIEKLNERLDSLKDYRIINRDLVVKDLERLKKRFDTEVINAELSEQLAKINVNLSRSYSEKGYLRLEKATGSENEWWAKIKPSQNDDWQQFEPDGYTIFSSRDHYASLFKSYSDYEIEAKIP…	Klebsiella pneumoniae	Gammaproteobacteria
Bacteroidota	Sphingobacteriaceae bacterium	JADJNO010000002.1	IPJ60_02075	gb|MBK7816430.1|	MNETFAATNKNLQKWKIYFSTLKDRVSLCRNLQFISKDDENKYLNLLSAKEFKPVNHLVFEKDFELNFSKLADHIHAYLYYKKNLIYTRYQIRNFLTLLKTHDIIVLSGLSGSGKTQIIKAFAEALGGVAKIIPVKPNWTSSDDLVGYYNPLQMSFLPTPFTEAIVEAINNPNQLYFICLDEMNLARVEYYFADFLSKLEERSKQPEIELYANHEEELFVSEFSTLLNLIESSIKGEEIKSWQEFLDNEEARKKFFEMLGNTDKESMLQLHAKMKRRLIDILKFPSTIRIPDNVRFIGAINVDETTHYFSPKILDRIHVVKFDNPLLFEEQVNSWFENTENEKELKPVYVQPNLLSERKEFPKVNNTELSTITQKLKEINQKFLLPLNIDFGIRSIRQS…	IPJ60_02070	gb|MBK7816429.1|	MPEFEILLISIDWESPDRVRTIVPSKKFLEASKIEGNKYDYDIVLYNKEDDLYFQFAVKTKHTPFLKTNDGNWNQNSRLYNIQDDLWIIKGDWRTGQRGISYHHCPSINTIGKIEIGISENLTQIQQFVTVDINSNIDDFDFAQLKNDFEGELWNLITSNKSNVTSDKIEIRYCDKIFRYAENQSIIEFIKAFDHISKNSKRELSHSKELRKTEKVIPIAETYRKLSISGTATILPSKAVLENHDIYENRFVCFMLHSIHLIVSKNIKYTSLQIERLKNEIEVLNQKISILQVPDPKVNPEKINNEILAQEEFLNEWKTKWENRKTAFVNNHNNTADSFNELVFQISGVIYFDGKPTFWGNKLNGNDLGWSALEFETDPEELFEDGKETTIKFFAAYKR…	Sphingobacteriaceae bacterium	Bacteroidota
Gammaproteobacteria	Aeromonas caviae	JAEHJB010000046.1	JD496_18830	gb|MBL0587855.1|	MVSEQVIYDLEEVKGLSDEELYQRLYDSWGLESHKIDVWGELSINEAGNWAGIRNAKTLNGNQNIEYPLADSHELQSGVFLTPSVAKIVLGNDSKGMVACELMLASIPQRAKKNNPFLLAVNDKTVERLTYLPDALPNLERQAIIHNEDETLLRKVIYDAEVKRVKHKIASETEALESALQEKQKDMTNKLAELSDAFKSTQDKIKISTSELESSIKRNEELNNDNHRLNLKIQASKAELDVIIEKSRRAEENMARKVEKLTDFIKEKAIFLKNFEFLDEEDFDFFVGSTLSNKDLGEHISFAQSLDSNYSDAVSYIQAYLKDRDILYPRHIIENFLTLVRTNDLIILAGDSGSGKTNLVQSFAKAIGGVSKIIPVKPNWTSSEDLLGYYNPLEKKYLA…	JD496_18835	gb|MBL0587856.1|	MEAPFVIKFIETKWHDKQTLVSVSESKYSLKLEQVGNNAFSAHTTIYPKVDELRFAQLAIKTKHGDQLPPYIAMPNGERRQLESIIDPASNAVWWVEPAHWDAKQRVWRSEARRTAGQITFVIGSSTLKLDIDISEKTKSDLSRYLLDFKADLWELILDENSHITGDAKNSQVAAIDQEALSLIASILTNAQTILKKPKVELKEVQALKPAKEVRPVPRTFMEICTKGSRKHLTSRASEPSYNVPENQYVSYVVSSTLSIVKQLARVAENKTSRFSSAVEKLNERLDSLKDYRSINRDLVVKDLERLKKQCSIKEINHELEDKLSQINSNISLQHLNVTTSYVKLENPTNPTNSENKWWAKVKYSLHAEWQQFEHDGYTILSSGSMYSSVFKSNCSYEI…	Aeromonas caviae	Gammaproteobacteria
Gammaproteobacteria	Acinetobacter junii	JAEUPO010000018.1	JNJ87_02495	gb|MBL8280779.1|	MENQITYTLQQLKNLNDDQIFLELKKIWGYKENESLRVIGQINRKSNFSQIYTLSNLKDSKGNSLLYPLENFKEDHGCFIGLSLPNTVEIGQWVQATLKLAPKKEREKHSNPFELNVQISSLKKLVEIPSKVIEDGIHDDLIENWVIEYFAEKNAEEITEKNKSVLMQHEILLKKEEELEKNLKSLEKKEISFLDKLAKNQEKIELCKLELEENKELVNAEKVELKKNKDLIIQAQAELISLKHQKEEILNKLNNFIEEKVNILRELEIIDEDSLHKLIGKNNTPVQLETHYLLGKDIKDIEEVIKHIQAYLYNKGTMYRRNILENFYTLLSTRDLIILAGDSGAGKTNLVKSFAEATGGKHYIIPVKPNWTSSEDLLGYYNPVEQNYLSTPFLTALID…	JNJ87_02500	gb|MBL8280780.1|	MLISARYIDVEWNATKQVKKVFYGSPIEIIKKSENNFFIETITFPKRFFYFAFRIEEPISNPPYFLFNEIKEDLLEIIDPKTGENWWIAKGRWISESKKRNYGNKYVHESFRTAGRLELHINDITIEISNRTNNFSVEEMEFFLTDFKNELWSIILNSESVVNAELQKSTPNIFNEDTILYVENCLNSVQKILNDPKFFLVENQQLVIKKKVKPVRRTFRELTTKPNSKTFTSRIHDKSYNNSENRYIHFCTEKLFFIFNKMLQVVERSNIQFSNMAKIYFEESDRLKNSDFKIIDKDLFIQEAYEIKQRSLNFYTELEKLNNNLLPSFLDEILKLNSKILNRNESGNEKLITYRFTLDQIFEYLDHSIQSRFLNGKEFETHPEYHIYNGKYLVVEFPD…	Acinetobacter junii	Gammaproteobacteria
Gammaproteobacteria	Klebsiella pneumoniae	JAEUZL010000035.1	JNS70_25055	gb|MBL9302562.1|	MALEQVIYNLEEVKGFSDEELYQRLCESWGITNGKLAVWGKILNGPDSDSRKLPTRLLEIKSLQTGLDTEYPINVRLTMDKGVFVSFKSVEELFGLEDGSFVSCELALAPQSEREKHENPFECNVVVSSVRRLIKLPEYTANDIIKGDENIFLDEAVYKQHLQNVQSRIDSEVTALNAEFEREESSLKAQISSYKDQLQHVQDDLNQKNNVLSQAIAKAQKLEVEHSEWQHKIALQKKAEETMSKKIERLKAYVESKAGFLKSFEFLDDDDFDLFVGSTLSNKDRDEHISFSQAFDSNYSDAVSYIQAHLKERDILYPRHIIENFLTLIRTHDLIILAGDSGSGKTNLVQSFAKAIGGVSKIIPVKPNWTSSEDLLGYYNPLEKKYLVTPFLEALIEAK…	JNS70_25050	gb|MBL9302561.1|	MEAPFVIKFIETKWHDKQTLVSVSESEYSLKLEQTGNNAFSAHTTIYPKVDELRFAQLAIKTKQGDQSPPYIVMPNGDRKQLESITDPASNAVWWVEPAHWDAKQRVWRSEARRTAGQITFVIGNSTLKLDIDISEQTKSDLSRYLSDFKADLWELILDENSHITGDAKNSQVAAIGQEALSLVASILSNAQTILKKPKVELKEIQALKPAKEVRPVPRTFMEICTKGSRKHLTSRASEPSYNVPENQYVLYVVSSTLSIVKQLVKVAESKKSRFSGAIEKLNERLDSLKDYRIINRDLVVKDLERLKKRFDTEVINAELSEQLAKINVNLSRSYSEKGYLRLEKATGSENEWWAKIKLSQNDDWQQFEPDGYTIFNSRDHYASLFKAYSDYEIEAKIP…	Klebsiella pneumoniae	Gammaproteobacteria
Bacillota	Fictibacillus barbaricus	JAFHKS010000042.1	JYA64_07250	gb|MBN3545084.1|	MNTTEIESNITTLEKWLETKAVEDISLLIKENLEQSFTKPSLNRFEKRLKNEVFGSTIVFRVESFETFNDKNKIERLKVNAVVMQPSKTGYTTCSHPIDASKLWYVSSVIQSNRFSEELKRGILFFASFRAAYDDKHLADLITFDLNSYKEIELSFTDLLKNFGGNQLVEAAQDIFGTDVEKVIAEKLLLASESTWTSLVTSEKEITKKRLSLGKREKAYEERLQVLEANEKRWIKILERTKEMIRLETEYELKNNIVPEEHEWDNGTIIKLLQSLIYHNSDDDLIYDPTIIESFLRGLQANILVVLSGPSGTGKSSLVTAVANTLKGAKSKIIPVQSSWTDTQDLLGYFNPLEKRFVASPFLEALSEAQEDSENLYFICLDEMNLAHVEYYFSEFLSA…	JYA64_07255	gb|MBN3545085.1|	MNLYQIYIRESVPEHSTSSFLYEEMDLEVYDPLIKIEQYYLMNEYSKVNNKTLRIGVYAPEAAHVFISNGNVKKYLVESKIHLGMWYEASRGWYEEGFLERSESCFGMNACGEWKVSAVSDEGKTLNEKRVVVIPRTFSYAQYRTMQAEVKSLFEGLTAEPEEGSYLKELQIPLFRLEELVLILEEFKDWALVICKNPSEKLVKSKEKMTRSKISKWDSHSILEAAMFPFREKILIQTSIKELNLEEHQMIRYMIEAFVEQVKQSMVIENSALKQLEFELNKRYETLNVINGLMKVFIEKRCTSLERDINWLKERQKKWEHCDSMLRMILSENLYMVDPVMPELTHLFSQDPSYGAVYELYEKFENMVPKMDSEERAFLEAVMSSPRLYEIWILLQLIH…	Fictibacillus barbaricus	Bacillota
Gammaproteobacteria	Klebsiella pneumoniae	JACKYS010000031.1	H4I68_27155	gb|MBN9844621.1|	MALEQVIYNLEEVKGLSDEELYQRLYDSWGLENHKIDVWGELSINEAGNWAGIRNAKTLSGNQSIEYPLADSHELQSGVFLTPSVAKIVLGNDTKGMVACELMLASIPQRAKKNNPFLLAVNDKTVERLTYLPDALPNLDRQALIQNEDETLLRKVIYDAEVKRVKHKIASETEALEAALQEKQQDMTDKLAELSDAFKSTQDKITASTTELESSIKRNEELNNDNHRLNLKIQESKAELDVIIEKSRKVEENMARKVEKLTDFIKEKAIFLKSFEFLDEEDFDFFVGSPLSNKERGEHISFSQALYSNYSDAVSYIQAYLKERDILYPRHIIENFLTLIRTNDLIILAGDSGSGKTNLVQSFAKAIGGVSKIIPVKPNWTSSEDLLGYYNPLEKKYLA…	H4I68_27150	gb|MBN9844620.1|	MEAPFVIKFIETKWHDKQTLVSVSESEYSLKLEQTGNNAFSAHTTIYPKVDELRFAQLAIKTKQGDQSPPYIAMPNGERRQLESITDPASNEEWWVEPAHWDAKQRVWRSEARRTAGQIMFVIGSSTLKLDIDISEQTKSDLSRYLSDFKADLWELILDESSHITGDAKNSQVAAIDQEALSLVASILSNAQTILKKPKVELKEIQALKPAKEVRPVPRTFMEICTKGSRKHLTSRASEPSYNVPENQYVLYVVSSTLSIVKQLVKVAESKKSRFSGAIEKLNERLDSLKDYRIINRDLVVKDLERLKKRFDTEVINAELSEQLAKINVNLSRSYSEKGYLRLEKATGSENEWWAKIKPSQNDDWQQFEPDGYTIFSSRDHYASLFKSYSDYEIEAKIP…	Klebsiella pneumoniae	Gammaproteobacteria
Gammaproteobacteria	Klebsiella pneumoniae	JACKYR010000033.1	H4I69_26795	gb|MBN9849922.1|	MALEQVIYNLEEVKGLSDEELYQRLYDSWGLENHKIDVWGELSINEAGNWAGIRNAKTLSGNQSIEYPLADSHELQSGVFLTPSVAKIVLGNDTKGMVACELMLASIPQRAKKNNPFLLAVNDKTVERLTYLPDALPNLDRQALIQNEDETLLRKVIYDAEVKRVKHKIASETEALEAALQEKQQDMTDKLAELSDAFKSTQDKITASTTELESSIKRNEELNNDNHRLNLKIQESKAELDVIIEKSRKVEENMARKVEKLTDFIKEKAIFLKSFEFLDEEDFDFFVGSPLSNKERGEHISFSQALYSNYSDAVSYIQAYLKERDILYPRHIIENFLTLIRTNDLIILAGDSGSGKTNLVQSFAKAIGGVSKIIPVKPNWTSSEDLLGYYNPLEKKYLA…	H4I69_26790	gb|MBN9849921.1|	MEAPFVIKFIETKWHDKQTLVSVSESEYSLKLEQTGNNAFSAHTTIYPKVDELRFAQLAIKTKQGDQSPPYIAMPNGERRQLESITDPASNEEWWVEPAHWDAKQRVWRSEARRTAGQIMFVIGSSTLKLDIDISEQTKSDLSRYLSDFKADLWELILDESSHITGDAKNSQVAAIDQEALSLVASILSNAQTILKKPKVELKEIQALKPAKEVRPVPRTFMEICTKGSRKHLTSRASEPSYNVPENQYVLYVVSSTLSIVKQLVKVAESKKSRFSGAIEKLNERLDSLKDYRIINRDLVVKDLERLKKRFDTEVINAELSEQLAKINVNLSRSYSEKGYLRLEKATGSENEWWAKIKPSQNDDWQQFEPDGYTIFSSRDHYASLFKSYSDYEIEAKIP…	Klebsiella pneumoniae	Gammaproteobacteria
Bacillota	Bacillus arachidis	JAGDQJ010000014.1	J4P90_13105	gb|MBO1626160.1|	MVHNIADSNHFTDDRNEITKEMVQEQVDTFKKEGVIGKEVVVRIEKVQNLSDQLWFYKCQVLNVNDSFHKLYNPLTNESWTITFLLKEKRFEKGDILIGSYNLETRPKYIGNLIKFVLNTLRNIPTIEHIKEKHGEQFINLLRKMFGREDQVLGLMYESWLETVEHDMEDYEKKIETFNEELEILNQHVGLLQMKQQDLKEETVSLEAEKSDLKSQIRNIKVAFGFEEEGILNLEKTTEELIECTGERDLYKTIQLALYHHNDENLIYEHHVIERFITALQTDQLVLLTGPSGTGKSSLVNQLGEVIDNFKIHHVAVQSSWTDVQDLLGFFNPMKKSYLPTPFLEALVQAGQEEESIHIICLDEMNLAHVEYYFSSFLSVREKHPNQRYIDLYSERFYR…	J4P90_13100	gb|MBO1626159.1|	MKPIWVKAHWNCPEHFLGACIEGTIAELQVLQELDMEDGIFVATEYNRGENEFLTIGVRANEDVTRVYATGKFSYERELLHVNDGIWLSSPQYVWNERFQRYENVSPSIGLNQCGIIRFVGETKEDGKITTGDVKIKPSLLTEAEYVQMEEDLLTITEELLFHTQINTGNTGEMRALIQLDSLQQAVKNIGDVVQQLEKNPAERLSTKRVKTDIDKLRKMDVRVLLEQEMYPFKRTVNALTTVRSHDISEHRKLKGALIDCIESCMRQKKKEQNVRNSLERQLKEVEELSYKVLTSHEKNLHSKFISKKQWLCKQMEELTPRDERWKELITYLEDVLSSYLFQDCETEEWGDTHLFNFHPLYEEAFEGIEELQKCLRQHEPLKAFQHDLLQSPDLYEKW…	Bacillus arachidis	Bacillota
Gammaproteobacteria	Shewanella algae	JADZGS010000025.1	I6M27_06155	gb|MBO2594339.1|	MALEQVIYNLEEVKGLSDEELYQRLCESWGITNGKLAVWGKILNGPDSDSRKLPTRLLEIKSLQTGLDTEYPINVRLTMDKGVFVSFKSVEELFGLEDGSFVSCELALAPQSEREKHENPFECNVVVSSVRRLIKLPEYTANDIIKGDENIFLDDAVYKLHLQNVQSRIDSEVTALNAEFEREESSLKAQISSYKDQLQHVQDDLNQKNNVLSQAIAKAQKLEVEHSEWQHKIALQKKAEETMSKKIERLKAYVESKAGFLKSFEFLDDDDFDLFVGSTLSNKDRDEHISFSQAFDSNYSDAVSYIQAHLKERDILYPRHIIENFLTLIRTNDLIILAGDSGSGKTNLVKSFAKAIGGVSKIIPVKPNWTSSEDLLGYYNPLEKKYLATPFLEALIEAK…	I6M27_06160	gb|MBO2594340.1|	MEAPFVIKFIETKWHDKQTLVSVSESEYSLKLEQTGNNAFSAHTTIYPKVDELRFAQLAIKTKQGDQSPPYIAMPNGERRQLESITDPASNEEWWVEPARWDAKQRVWRSEARRTAGQIMFVIGSSTLKLDIDISEQTKSDLSRYLSDFKADLWELILDESSHITGDAKNSQVAAIDQEALSLVASILSNAQTILKKPKVELKEIQALKPAKEVRPVPRTFMEICTKGSRKHLTSRAPEPSYNVPENQYVLYVVSNTLSIVKQLVRVAESKMSRFSGAIEKLNERLDSLKDYRTINRDLVVKDLERLKKRFDTEVINAELASQLGEINANKYFSPNHAAKGYLRLEKTTGSENEWWAKIKPSQHDDWQQFELDGYTIFSSGEHYASLFKPYSDYDMVAI…	Shewanella algae	Gammaproteobacteria
Bacillota	Acidaminococcaceae bacterium	JAGBKT010000004.1	J6M57_00185	gb|MBO6264417.1|	MGKYIGRIEKIDNYFNFNPLAEICDGQIKILTDKEKERLLVNSPKPVINFSSYKDIENIEIIAKEKILVIHEFETKNLSTRNYSDYRYFETEPKIYYMDIDILKDISNSNVSLNNEFEKLKKEHMYLEKFKHVVQEREQDKIENEIKDNSYESFADVIQHIENVFEKRGYNYDKKILMSFYLGLQTDQLILLMGKPGSGKTSLVREFAEVFGIEYENIAVQANWADKSDLLGYYNPIDKNYVSTPFLDCLMDFCRVADKKENEDKLYFICLDEMNLSHIEYYFADFLSVLQEPNPEERKIKLYSKYLCENILQELECFGFVDTNIKEIIESQKSLSTEKFEEINGNLKSHEDILKMKYYFDLCRSLKMLKEFPYEIKIPKNIKFIGTLNQDETTLDISP…	J6M57_00180	gb|MBO6264416.1|	MKIEMALLQPDYDCNKKLNFNEARIISEIEKLGEEQFFFKDIGLPQKGDFFKTKTHLCIRGSYFCIPLFVVELSEGESIENFSIFYNCTGDRDNTIELQKWPKRQDKKSVVWYFAEENYPAVGTIWPGYVDIIIKTKDKENTAIGTKKLWICPNSLSVNQFNQMLEEISLIPYYVFQLERNEIRKAYLGLDWKRDLEIIKIKIDKIEKCLRTIEKLPRGRLKRSKRMESYSKIKCFNSSVVSQYLKKNNNKKYLIYSPEHSLEIYEHRVFYNRFFRLRERLDDLTKDYKKTEKEKIENICKYRKDGENESIIKEKIKKNEIIKKEIKDIEKQETDIIDTIKKFFKLSIFKNIKVTNENWRITQILANDLRYRQVCKILKSLDLITTQPNVSDWKKIFVQ…	Acidaminococcaceae bacterium	Bacillota
Gammaproteobacteria	Klebsiella pneumoniae	JAGIZF010000032.1	J8J16_26325	gb|MBP0696166.1|	MALEQVIYNLEEVKGLSDEELYQRLYDSWGLENHKIDVWGELSINEAGNWAGIRNAKTLSGNQSIEYPLADSHELQSGVFLTPSVAKIVLGNDTKGMVACELMLASIPQRAKKNNPFLLAVNDKTVERLTYLPDALPNLDRQALIQNEDETLLRKVIYDAEVKRVKHKIASETEALEAALQEKQQDMTDKLAELSDAFKSTQDKITESTTELESSIKRNEELNNDNHRLNLKIQESKAELDVIIEKSRKVEESMARKVEKLTDFIKEKAIFLKSFEFLDEEDFDFFVGSPLSNKERGEHISFSQALYSNYSDAVSYIQAYLKERDILYPRHIIENFLTLIRTNDLIILAGDSGSGKTNLVQSFAKAIGGVSKIIPVKPNWTSSEDLLGYYNPLEKKYLA…	J8J16_26330	gb|MBP0696167.1|	MEAPFVIKFIETKWHDKQTLVSVSESEYSLKLEQTGNNAFSAHTTIYPKVDELRFAQLAIKTKQGDQSPPYIAMPNGERRQLESITDPASNEEWWVEPAHWDAKQRVWRSEARRTAGQIMFVIGSSTLKLDIDISEQTKSDLSRYLSDFKADLWELILDESSHITGDAKNSQVAAIDQEALSLVASILSNAQTILKKPKVELKEIQALKPAKEVRPVPRTFMEICTKGSRKHLTSRASEPSYNVPENQYVLYVVSSTLSIVKQLVKVAESKKSRFSGAIEKLNERLDSLKDYRIINRDLVVKDLERLKKRFDTEVINAELSEQLAKINVNLSRSYSEKGYLRLEKATGSENEWWAKIKPSQNDDWQQFEPDGYTIFSSRDHYASLFKSYSDYEIEAKIP…	Klebsiella pneumoniae	Gammaproteobacteria
Alphaproteobacteria	Aminobacter sp. DSM 24754	JAGGKU010000046.1	J2Z36_004441	gb|MBP1960417.1|	MRKPQTGKSSPVGLAAGGNYATLKEAIERSPSGLLDELRFVWDLPEDKPIRVIGRVWLKALEDGRELWFLDDIEHPEKGVGLLYPKISSPLDNKDAVAARAFVPPGPSRKVIDPQVAASGNQWAVAELELSPVEHRQKQRNPWLTHVRSGTLRPLSEIPVDWRVAVTGPESARRISALARGEIEDYLRKLVLDQDEELARRLEENDKALDNLAAAGRQAEANAAAVHAQVEAELSSHRQRRDEAERSVIEVQSQLRDEQERLAAYQRTVDQEKQTMEIAYRRLEELLSEKGDRLVALGLADAEDIAALLPRLGTMEEAREGISFADALPGGFAQLAPLLQSRMAEQGLLYSQALLRDFLALLRTRDLVVLAGDSGSGKTSLVRAAAKAIGGVCTIIPVK…	J2Z36_004442	gb|MBP1960418.1|	MGVSAHHLEIEWDSPGIARRIEVSTYPIEIVTARDGTMHAEVSIFRNFAPWVGLQLSGQFASVEPATVDAQGKRHPWLPVLDEHGAVWWIPATGWSKPNSRYLSEMHRSFGTFSVELGPYRNLVIDAVANELDRAHAQEYLNDFRDELVWLAIGKPTGALGEVGSDYSRDLVDALREFAHAAGRVLEHPAQEIREVTALVPPSRLRPNAETFRAVMRRPGARLYPGRAAQESADVPENRYLRGLVQHCRRVAQSVARSSSRHHGHLAARSAREKARAADLLATERIEVDQEIFDNQLADIRRRMDAIANWADGSVLSRSTEREYRFSVGKKYEGKGGGLFYRNLDGDSQNGAGERFQVSVAQFPEGLHELVREAQSIDKDLTLVLVGKASISPFTTANG…	Aminobacter sp. DSM 24754	Alphaproteobacteria
Gammaproteobacteria	Aeromonas sp. PrichA-15	JAGKRH010000201.1	J9889_19160	gb|MBP4034014.1|	MTNKLAELSDAFKSTQDKIKISTSELESSIKRNEELNNDNHRLNLKIQASKAELDVIIEKSRRAEENMARKVEKLTDFIKEKAIFLKNFEFLDEEDFDFFVGSTLSNKDLGEHISFAQSLDSNYSDAVSYIQAYLKDRDILYPRHIIENFLTLVRTNDLIILAGDSGSGKTNLVQSFAKAIGGVSKIIPVKPNWTSSEDLLGYYNPLEKKYLATPFLEALIEARQNPDIPYFICLDEMNLARVEYYFADFLSKLEERNEQPTIQLYSDDEAAHVLAELKGVVSIISNAQEKFSKNGIVDFVALMQDEDINAEMKRAFGFSDKDSLIKYHGDIRRMLAGVLGTPSSITISANVRIIGAINIDETTHYLSPKILDRAHVMKFKSPLLTDWDTIFDEIDSYG…	J9889_19145	gb|MBP4034011.1|	MKAILTIKLTAYHRPISICFVGKKLFLIFNKMFTISPWDLWELILDENSHITGDAKNSQVAAIDQEALSLIASILTNAQTILKKPKVELKEVQALKPAKEVRPVPRTFMEICTKGSRKHLTSRASEPSYNVPENQYVSYVVSSTLSIVKQLARVAENKTSRFSSAVEKLNERLDSLKDYRSINRDLVVKDLERLKKQCSIKEINHELEDKLSQINSNISLQHLNVTTSYVKLENPTNPTNSENKWWAKVKYSLHAEWQQFEHDGYTILSSGSMYSSVFKSNCSYEIDALFPAPSKRGKVSILFPKYISRLTLLSDSLSLQRDRDNFKKLRDQGIILNENGWKTKLTPEEFSEQEKERATIRKRLSYFATEREKVRMVHQVLAPKIKPFQQVEKEWRQCK…	Aeromonas sp. PrichA-15	Gammaproteobacteria
Gammaproteobacteria	Aeromonas sp. Prich7-2	JAGKRI010000024.1	J9892_05735	gb|MBP4058347.1|	MTDILYESSELLGLSDSELLERLDRSWGIASDGFKVWGEFSRTANGTWGYLKNPRSIKNNQLLSYPLSGANGTCEFWIHPQDASKFEGTSIFIKCRLEFAPIAERKKHKIPFEMKVVRGSCRELTKLPEVVTNDIFTNQSNESFITKSLYNFYHKQTSIKIEKEFEAKRNEYEHILSLKIQETQEIESKIDSAAQLIGSLVNKQQKLQESNSLLDSDITSKKKQLKLIIDNFRKVEVEMNAKIARLRSYISDKASFLKTFEFLDEDDLEGFLLEPKSQSDKIDGVSFINDLAGDYEKAVSYIQAHLVENDILYPRHIIENYITLLRTKDLIILAGDSGSGKTNLIKSFAKAVGGKSIVVPVKPNWTSSEDLLGYYNPLEKKYLSTPFLEALLEAHKNPE…	J9892_05730	gb|MBP4058346.1|	MKADFEIKYIEIQWYDKDTITKITESLVSLSLEYSAEIQTFECETTIYPKVKGIQRGQLAIHFFDERNGIAPYIRMPDGRVKNLNKIKDIDTGKVWWIVQELWDIKDKYWRHTGVNTAGTLIYVLNDIDVHIHIGAMDFTRRQLEDYLRSFKDDLWELILDELSSIHANIQKDGISINEHVIENISNMIIHAEKILKTPKIELREIQALKPRKMVKPVSRTFMELTNKANHKVLTSRATNPSYNVAENRYILFALERCYRIIKQVVTLSGNKSQRYADKVNKLKDQHDSFSDTVTVDRNLLVKDFEIMREKCHLQYWQQQLTKSLVAEGVLFDSGNTISNTLFFRTKRFSKDRETNVNDGFFIDVFELENSNLVQRKYDSEYAILSFRNSHAELLACLT…	Aeromonas sp. Prich7-2	Gammaproteobacteria
Bacteroidota	Bacteroidia bacterium	JAGNSJ010000019.1	KA450_03915	gb|MBP6412569.1|	MTVAELAKKIKTSPETLFALFERIQKPIPHELEFELSESLVSSAISIISPLEKNRKTEKVNIEEEISKIESNELKKLLALKSEDLIREIRELNNLQHLILSGKFKQRNETNNFGYFEDVLDTNGNDVYYPNLNKNQSAQRIREIFIFSPKDLEDGERYHFKCELANNKERVKQKNPYLLQTTSRKVKLTNGVNDIAVAIEEKQASLANLKNKIDFVKFEIEEKVKAANETLEEYNQRIKDEFVKIKEKEEEFSSLNSSFEETTQKILNMEILLKTLRDRVALCKNLQFISEDDESRYINLLAAKDFKPIDHLDFKSDFEESFSKLSDHIHAYLYHKKNLIYTRFQIRNFLTLLKTHDIIVLSGLSGSGKTQIVKAFAEAMGGIAKIIPVKPNWTSSEDL…	KA450_03910	gb|MBP6412568.1|	MSEFQVLLVSIEWESPDKVRAIIPSKMFLEPSTISDNKYEFDIVIYTKEDDQYFQFAIKSKYIPFLKPSGSGWKQATPLYQIQEDLWIIKEEWRIGQREIGFHYCPSINTVGKLEIGLRDEFQNLHFITLDINSNIEDFDFIQLKNDFEGELWNLITTNKSHVSSDKIEIRYCNKIFRYPENKSIVEFLKSFDHITKHPKRELASTKEMSKTEKVIPIPETYRKLSKGGNSSHLPSRAFLENYDVYENRFVCFMLHSIHSIVSKNLKYTSLQIERLSKEIEVLRNKINLLQVQDPRVTPESIKQQILFQEHRVNRLQREWSEKSNQLIFNPEIKFKYLKVKIKFFYNNDVNSFWCMTKEVPFCVFKFPDYLMRHLAPSTEFNLEAAYSLIGTVQTNAGH…	Bacteroidia bacterium	Bacteroidota
Gammaproteobacteria	Shewanella sp.	JAGNQR010000204.1	KA308_18660	gb|MBP6520817.1|	MNAKDTIYTWDEVKDLSDDELYQCLYECWNITNGKIEVWGEVELKHEKWAGVFKVRTTSENRSISYPLNVRLNIDSGVYFPPKDAKKLLDEQDKPWIKCELILARPVEREKSGNPFLLSVRTGSYERLVKLPLIEAEEILDLQEGVILNDEVSSYLTESIYNLHFDLANKKIIESLADKQLAIEEIEKARDEASISLSELSDQKNALEASRSQLQLTISAQKTKLAALIKHHQNAEQEMTRKIERLKSYISEKALFLKDFEFIDDEDFDNFIHNATPAYDLSEMLDFSSAFNGDYKQAVSYIQAYLKGQDILYPRHVIENYLTLTRSNDLIILAGDSGSGKTNLVQSFAKAVGGVAKIIPVKPNWTSSEDLLGYYNPLEKKYLATPFLEALIEAQQNPE…	KA308_18665	gb|MBP6520818.1|	MQADFEVKYLDVRWYDRDTVLSILESFIPLKTEFDSEMQHFICNTVIYPKIDAIKNGRLAFRYLVRNSVAPYFEAADGIRIPLKLILDKESGKEWWVEANAWNADRKDWSSKTYRTAGKLVVVLKDQICQINIGSSEFTIEQLERYLFDFKSDLWELILDETSYVTGEVKVTQEGGVSEASLHLISNILSHAQQILSNPKSELREIQTLKPRKMVKPVTRTFMELTTKGDSRFLTSRATEPSFNVPENRYVLFALQRIYKILNQLVTISRSKINRFESSLDKLNERYNSFSNEKIIDINLVRKDLERLRKSCDLSELNRNLQLKLSQVPSSGVPIKKIYWKIGRELNAGGQYFVGVKEQIDHEWLERGESKNIVVLSFSDSSLKDLFSTGFEYEVDAEF…	Shewanella sp.	Gammaproteobacteria
Bacillota	Selenomonadaceae bacterium	JAFSZS010000118.1	IJT73_06185	gb|MBQ7704994.1|	MIYEKDLCTYEEFKNMSIRERRYYLNKVYGDSLSHRVIAVIKEFSSNKIEFEIKYFILQNNLLQEFYLFKDKSFSSFTSNSNILIASCIKKNFSVGDSLVCEIYAGDVHPVSFFVCSKKQAKSILETYEKIGISYNPDEISKENNKNFNDDSTLANIDVQLQKNIEEKNSEIELLEKRLNELKKLQEDAENQYKDKVQIQEQKLTEEYNQKKSELQNLISGMENERNELKEDIEDLNSNIEDLNKKIQRLNNELEEKSNERYELEEYIENLNRQKDSLEEKLNILRAYGINFFDKEPAEEIVIEEETADFDGVIDFLFNGDSAKKISTQKKSVKLRNFNDFDEMADYWQSHLNTAKYNFLKYDKRILESLYFGLQTDQLILLMGNPGTGKTSLVKAFAK…	IJT73_06190	gb|MBQ7704995.1|	MELLMTLINAQDFTPLADNEYTENIFRTDERGYFQTHIYFGNYIPAFSFEGAAENYSLEFGADKDGNRQKFQRHFNFYYDKNLGWNVAGWTYIFVLKDGAIIETHKLLTLPDIKECEAMIRELLSIRRELFQKSNENKSSLAENLREKNWAEILQALNEQAEEIFQLMKNVNARRRFGLQKFQTQVTASKIHRFDEKIIRQYAIAPNRKKYFVSAEKISMNIFENRLLKNKILRLKNFVERQSQQQKINAEALQQDIVAQIKHVENLKPQNDDNKSLAENALKSLNSQLQANKKNLAVSPDKILEMLNKCLALPVFNGVENKNEKWRMTQIFTNDANYRRAYLKLKELDEIFDFSFDADEKSFPAEKMYQIYEWWVLAKIIEFLVVKLQFKIENTSDNP…	Selenomonadaceae bacterium	Bacillota
Gammaproteobacteria	Aeromonas caviae	JAGDEU010000034.1	J4G57_20545	gb|MBS4710244.1|	MVSEQVIYDLEEVKGLSDEELYQRLYDSWGLESHKIDVWGELSINEAGNWAGIRNAKTLNGNQNIEYPLADSHELQSGVFLTPSVAKIVLGNDSKGMVACELMLASIPQRAKKNNPFLLAVNDKTVERLTYLPDALPNLERQAIIHNEDETLLRKVIYDAEVKRVKHKIASETEALESALQEKQKDMTNKLAELSDAFKSTQDKIKISTSELESSIKRNEELNNDNHRLNLKIQASKAELDVIIEKSRRAEENMARKVEKLTDFIKEKAIFLKNFEFLDEEDFDFFVGSTLSNKDLGEHISFAQSLDSNYSDAVSYIQAYLKDRDILYPRHIIENFLTLVRTNDLIILAGDSGSGKTNLVQSFAKAIGGVSKIIPVKPNWTSSEDLLGYYNPLEKKYLA…	J4G57_20550	gb|MBS4710245.1|	MEAPFVIKFIETKWHDKQTLVSVSESKYSLKLEQVGNNAFSAHTTIYPKVDELRFAQLAIKTKHGDQLPPYIAMPNGERRQLESIIDPASNAVWWVEPAHWDAKQRVWRSEARRTAGQITFVIGSSTLKLDIDISEKTKSDLSRYLLDFKADLWELILDENSHITGDAKNSQVAAIDQEALSLIASILTNAQTILKKPKVELKEVQALKPAKEVRPVPRTFMEICTKGSRKHLTSRASEPSYNVPENQYVSYVVSSTLSIVKQLARVAENKTSRFSSAVEKLNERLDSLKDYRSINRDLVVKDLERLKKQCSIKEINHELEDKLSQINSNISLQHLNVTTSYVKLENPTNPTNSENKWWAKVKYSLHAEWQQFEHDGYTILSSGSMYSSVFKSNCSYEI…	Aeromonas caviae	Gammaproteobacteria
Gammaproteobacteria	Aeromonas caviae	JAGDEV010000006.1	J4G62_12795	gb|MBS4721128.1|	MRVQNRGADVAPNGLHETTFEAATQERALLDELRAAWGIAPDAPIVVIGQLQSKKAINDRTLYFLEGLEHPETGVGLLYPGLDSVAASAFVPLSEVGRFNVSSLPWMIAELQLSPIEHRNKHKKPYGCMVRKGSLRPLRDIPTGWGVTVSGRDSVRRISEAAFVAIQTQQQELLAHSEAKLADIINQNAVELTRQTDELSRLEDSKNSHRQAIEEMRSRAHAESVHAAERKERITNEIHAMKDRLNRLSDLMADKGRRLVALGILDELDLLALLPPGDTKNEQLSHDFQELLGADFSRLAPFVQARLWQTGMLFTQAQLRDFLALLRTHDVIVLAGDSGAGKTSLVRTVAESISGRCTVIPVKPNWTGPEDLLGYYNPIERSYQPTPFLLALQAAQAEP…	J4G62_12800	gb|MBS4721129.1|	MRPEIEARYLGVEWLDRGRARRIEVSPDPLDVVLSLDDVLRVETQIFHDFHPWLGLRLSGRLYQSKPVFVDAQGIEHSMLAVEDGAGSVWWVQDDGWDALEQRHLSELHRTMGRFEVRIDDQCLLIENLTTGLGRAQLDEYLQDFKNDLIWLVLGSGTATTAGASDVFGDKLPAALSDFASAAARVGAHPARALREILVETSRSRLRPNTASFRQHARHPSRPRLVGRASEETAETADNRYLRHMVQVCDRIALSADQAAQQQAARLAERARFEDERGVVYGATNTRQVDPEVFGRQLAELTEKLDRLAAWSDADEDPYEHACNLQAYRIEITRRYGHRSDEFFFEKPEGRSVYDKQKGVEYNVVRLPEELCNLVVAAQNFCKSYRLTGTPSISLKQNT…	Aeromonas caviae	Gammaproteobacteria
Gammaproteobacteria	Wohlfahrtiimonas chitiniclastica	JAGIBV010000005.1	J7553_05975	gb|MBS7836445.1|	MTTIMDLTSEQLWQFSDDQLIEILRKEWGYSKGEPFEVIGQIQPINHFWILDPFYHRSGEHLLSYPNLDDTKPIRNTIYIGSINTSVSKNQWVKIRVELSPLRERKKHENPFDLCAVSNSLTVLEVIPEMATSRENISQDTISQFLSIDGQHYVEKCVLDYYTQKNQEEIKKQTSNFENQLKNDFESQERLIQQLKTDFSELDTKYKRKNTSFKNLKIKVSETSEKLEKLEAHYINQQIQMENQLNTLNNFIEKQATILSDLELISQDELNQILGTPSSQNLSPSHHFINDFDGSLPNAIKYIQAYLFKQGIIYQQSVLEDFCALLMTHDLIILAGDSGSGKTNLVKSFAKAVNGRAVIIPVKPNWTSAEDLLGYYNPLEQKYLSTLFLDTIIEANKNP…	J7553_05980	gb|MBS7836446.1|	MIDIRYIEISCDENQNINQVTTSDEPIEIQKRSDGLFIETIVFPKIYHYLGFCISDEEVTETPYFQLTNGKKEELFPIKVPGKKVTWWIQNSGWDAINNRFYSEIFRTVGRYKLFIQNQVIEIENESFDLSLQDLEYYLNDFKNGLWNLILNHSSAASAYMSSGNGTINNTFLDLISNFIDHTYKIIANPSAELHEIQANKPIRSVKPIPATFRELALRPNRKNVISRSFTESYNTTENRFIHYCVNRIYFLLKSLQRISEAQNQQLQHKIIQENKYLSQLQLMTHKIIDPIVYDNEIKKLENDLSVLNQKIALMKNNLILGAYPAFSNTKEQIPGKCIIQLSTKHAHNQNQFFCQKFNHVNPQEQFSSYMVIEFPDELIYNLDLEYTTLRIYGTFTKS…	Wohlfahrtiimonas chitiniclastica	Gammaproteobacteria
Gammaproteobacteria	Gammaproteobacteria bacterium	JABIMV010000154.1	HOG41_11990	gb|MBT3724094.1|	MTLNLKYSIDSLKDDTDADLLIKLKKAWGYESRQRLKIVGKLEEKKNKKNGEKLYFLTNLRSANDFSILKYPVGMEADWRNIDIVFIPPSKVKNSLNYFKSSDFVVTNVELSPKIERINHNNPFALKSVGNLELLTELPFDLKELPEIEGKAYIEKEIFNFYLNKSSNEIENQKQKNLEKVRSEFEEQVSKFDEQKKELEQRVDDLQETEGGLDLTINDLKVKQESISTDIKQADKELMHKGIELKELTQTYKDRKNRMENNLNRLNTFIREKAKKLSKLELVSDSDLSRLLGEMKAQNSGKEMVDFHEDLNGDFNQAIKHIQAYLYKKDIYYKQDLLKDFFALLRTNDLIILAGDSGSGKSNLVKSMADAIGGISVILPVKPNWTGAEDLLGYYNPLE…	HOG41_11995	gb|MBT3724095.1|	MTINIEVKYLNVKWADKDTVLKIEFSDLLPFESLNSDYQIESTTFKTYLPRIGFKILDQDILHTPYFTISNNEKKNLLGIKDPDTLEIWWIESSGWDKKNLLHHTELYRTVGNLHVVIQNQKIKIVNNSLDFTVEELESYLRSFKNDLWMIILNENGYIKGQIEKSIPNIFSTDLLKLLQEYADSVEQIVNKPTIELKETQALKPIKSVKPVNKTFMEIAVKGNPQYLTSRDFVESFDTADNRYIHYTLKRILYLTRQISVLGSSQQTLYEKIIKSETLRLNHFGNMKKVDHTVFESEIQSIERKVNSINCKIQESLVNYNNYLPSEQSTHRVVLTKKYGRDDSFGYFCEIINGVNFKEKYQTYLVVYLPGNFQIPELIHPSRAVEVEITGTIHQDSDK…	Gammaproteobacteria bacterium	Gammaproteobacteria
Fusobacteriia	Fusobacteriaceae bacterium	JAHQRH010000143.1	KTQ14_09545	gb|MBU9918719.1|	MSKIIYLGNTIYTKNELVNLSDEDLLLILKKSFNINPNEPIEIIGELGRIETSIGTIHHRIYNIKLSKDFSSLNYPLIDLEYNITENGIYVPPNFDKILKKQLKENSKLLVICNLELAKKEERIKHDNPFLLCVNSLTIQTYSQIDSKFIIKDENNNIILKTSVINNIKYEYKEQLEQEIQKFENELLVEKSNINQKLELLKEDFLEEEKNFSEKKLFLEETLNLLKLEHDKKNEKIDFLKEQEQKLSNNINDKNIILKNINELIEEKDKELSELEEIMAKKLEKLREFVRVHADRLLELEFIDEEEYNDVLMINRQENLTDEIFLNFKEDFESNRQKAISHIQAYLFNKDVIYPRYIIEDFFALIQTNDLIILAGESGSGKTNLVKSFADAIGGKAFI…	KTQ14_09540	gb|MBU9918718.1|	MIPLIEVKYIAIKWHDENSVLKIEEEIIPTTSLEVEDEKTYNLELQAYKRILDGKDGQVAFHISNLEDDVEPYFIDSANNEVPLLKITDPANDKEWWVEKGNWNGNYRNAPLWNHVGDAKIVFGNIICNITIRANSFTREQLELYLNDFRNDFWYLILKEDSITQGEARAQEIRLLNKDSIDLIDRFIEFVEKVLANPKKELREIQGIKDIKKVKPVPRTFMEIASTGFKKKLTSRDTIESYNVAENKYIYFMIDKVYKIVFYMLRASGHMEDIFERKIQYEQKRINSFIDTKTIDKETFENEIIDLKSRVKKEKENLINSISNQDYTIKEQLEIKIRNQNNIFEQITYAIQTQPQINNQTQPQRFIIRLESRQQDYGNKIQFWGKIRKIESENWDNFG…	Fusobacteriaceae bacterium	Fusobacteriia
Gammaproteobacteria	Klebsiella pneumoniae	JAHQNE010000002.1	KTO85_27790	gb|MBV0455780.1|	MALEQVIYNLEEVKGLSDEELYQRLYDSWGLENHKIDVWGELSINEAGNWAGIRNAKTLSGNQSIEYPLADSHELQSGVFLTPSVAKIVLGNDTKGMVACELMLASIPQRAKKNNPFLLAVNDKTVERLTYLPDALPNLDRQALIQNEDETLLRKVIYDAEVKRVKHKIASETEALEAALQEKQQDMTDKLAELSDAFKSTQDKITASTTELESSIKRNEELNNDNHRLNLKIQESKAELDVIIEKSRKVEESMARKVEKLTDFIKEKAIFLKSFEFLDEEDFDFFVGSPLSNKERGEHISFSQALYSNYSDAVSYIQAYLKERDILYPRHIIENFLTLIRTNDLIILAGDSGSGKTNLVQSFAKAIGGVSKIIPVKPNWTSSEDLLGYYNPLEKKYLA…	KTO85_27795	gb|MBV0455781.1|	METPFVIKFIETKWHDKQTLVSVSESEYSLKLEQTGNNAFSAHTTIYPKVDELRFAQLAIKTKQGDQSPPYIVMPNGDRKQLESITDPASNAVWWVEPAHWDAKQRVWRSEARRTAGQITFVIGNSTLKLDIDISEQTKSDLSRYLSDFKADLWELILDENSHITGDAKNSQVAAIDQEALSLVASILSNAQTILKKPKVELKEIQALKPAKEVRPVPRTFMEICTKGSRKHLTSRASEPSYNVPENQYVLYVVSSTLSIVKQLVKVAESKKSRFSGAIEKLNERLDSLKDYRIINRDLVVKDLERLKKRFDTEVINAELASQLGEINANKYFSTNHAAKGYLRLEKTTGSENEWWAKIKPSQHDDWQQFELDGYTIFSSGEYYASLFQPYSDYDMVAI…	Klebsiella pneumoniae	Gammaproteobacteria
Gammaproteobacteria	Klebsiella pneumoniae	JAHQXR010000088.1	KS925_16760	gb|MBV7343559.1|	MALEQVIYNLEEVKGLSDEELYQRLCESWGITNGKLAVWGKILNGPDSDSRKLPTRLLEIKSLQTGLDTEYPINVRLTMDKGVFVSFKSVEELFGLEDGSFVSCELALAPQSEREKHENPFECNVVVSSVRRLIKLPEYTANDIIKGDENIFLDDAVYKLHLQNVQSRIDSEVTALNAEFEREESSLKAQISSYKDQLQHVQDDLNQKNNVLSQAIAKAQKLEVEHSEWQHKIALQKKAEETMSKKIERLKAYVESKAGFLKSFEFLDDDDFDLFVGSTLSNKDRDEHISFSQAFDSNYSDAVSYIQAHLKERDILYPRHIIENFLTLIRTHDLIILAGDSGSGKTNLVQSFAKAIGGVSKIIPVKPNWTSSEDLLGYYNPLEKKYLVTPFLEALIEAK…	KS925_16755	gb|MBV7343558.1|	MEAPFLIKFIETKWHDKQTLVSVSESEYSLKLEQTGNNAFSANTTIYPKVDELRFAQLAIKTKQGDQSPPYIVMPNGDRKQLESITDPASNAVWWVEPAHWDAKQRVWRSEARRTAGQITFVIGNSTLKLDIDISEQTKSDLSRYLSDFKADLWELILDENSHITSDAKNSQVAAIDQEALSLVASILSNAQTILKKPKVELKEIQALKPAKEVRPVPRTFMEICTKGSRKHLTSRASEPSYNVPENQYVLYVVSSTLSIVKQLVKVAESKKSRFSGAIEKLNERLDSLKDYRIINRDLVVKDLERLKKRFDTEVINAELSEQLAKINVNLSRSYSEKGYLRLEKATGSENEWWAKIKPSQNDDWQQFEPDGYTIFSSRDHYASLFKSYSDYEIEAKIP…	Klebsiella pneumoniae	Gammaproteobacteria
Cyanobacteriota	Myxacorys californica WJT36-NPBG1	JAHHHO010000061.1	KME13_21255	gb|MBW4421713.1|	MVLAPLLSERLPGRVERVATTGNLYIKSLIPLSCKDGSSANIFFAFQENVKGIQGLLRPGDVVTFLWSEPGQRRYIRSKNEYGEPQAIEVEASRESEINQIIKDFQERLSTELRQELERWKIELQTQQDKLDQLIAERIKDKVEEINKQKVELQEQTAKVQQQEAKLKSDFEEQEAQLLAELEQKQQSIALWEQSVKSFADSIEGAKTEINHLRKAIEPYRLAVPLIVEKQPSQPSEVSPLPQNLAENWGSMLAAAGLVLPQNIATSYLLSLVSAFYSGSIVLLNGPVGVGKTSIIKNSAKILGGISKVIPVRPAWLDPSDLLGFFDPLSETFRPSPFLTALKDAKTQSDRLCLVCLDELNLARIENYGADLLSSLEYSWSRQKEQSFSSDYEQQGLLL…	KME13_21260	gb|MBW4421714.1|	MDKRSLLDKSMSYPSIRFVDVNGTPFNPDEDGLTHVRQFGGAWYVELDRAWQGEVALDGTPPILLIQVPNTNRWELPPGRERVEIIRRSGEVTVVLIDSTGKVARDTATTLHIYPANISEWQIDRMVSDIGVLALSTAWCVRRLVPVPMGEGFGAEGLGQQWIAGNGMIATATALLELAAVVQDNWSAIQKRPLKSFVTEVGPVGIGKANLSPQLLIKSKVEPGKRRVLGMTRIESTQCMENEFLCYILDVYLLDLASGLITSLESLSLINIEDDLIPAKPRRKDEEFQEFIEASKQRIQTFRLRQEELKKQINCKILQLQSCVQWATQSRSSNFLVDIKTPDEPVFNSLRLIASPNYGPIFEKYSNSKGDILEPIQKVLYLLEHIYRGEIQPTWEIYE…	Myxacorys californica WJT36-NPBG1	Cyanobacteriota
Gammaproteobacteria	Klebsiella quasipneumoniae	JAAXMX010000025.1	HF672_25725	gb|MBX4843050.1|	MALEQVIYNLEEVKGLSDEELYQRLYDSWGLENHKIDVWGELSINEAGNWAGIRNAKTLSGNQSIEYPLADSHELQSGVFLTPSVAKIVLGNDTKGMVACELMLASIPQRAKKNNPFLLAVNDKTVERLTYLPDALPNLDRQALIQNEDETLLRKVIYDAEVKRVKHKIASETEALEAALQEKQQDMTDKLAELSDAFKSTQDKITASTTELESSIKRNEELNNDNHRLNLKIQESKAELDVIIEKSRKVEESMARKVEKLTDFIKEKAIFLKSFEFLDEEDFDSFVGSPLSNKERGEHISFSQALYSNYSDAVSYILAYLKERDILYPRHIIENFLTLIRTNDLIILAGDSGSGKTNLVQSFAKAIGGVSKIIPVKPNWTSSEDLLGYYNPLEKKYLA…	HF672_25720	gb|MBX4843049.1|	MEAPFVIKFIETKWHDKQTLVSVSESEYSLKLEQTGNNAFSAHTTIYPKVDELRFAQLAIKTKQGDQSPPYIAMPNGERRQLESITDPASNEEWWVEPAHWDAKQRVWRSEARRTAGQIMFVIGSSTLKLDIDISEQTKSDLSRYLSDFKADLWELILDESSHITGDAKNSQVAAIDQEALSLVASILSNAQTILKKPKVELKEIQALKPAKEVRPVPRTFMEICTKGSRKHLTSRASEPSYNVPENQYVLYVVSSTLSIVKQLVKVAESKKSRFSGAIEKLNERLDSLKDYRIINRDLVVKDLERLKKRFDTEVINAELSEQLAKINVNLSRSYSEKGYLRLEKATGSENEWWAKIKPSQNDDWQQFEPDGYTIFSSRDHYASLFKSYSDYEIEAKIP…	Klebsiella quasipneumoniae	Gammaproteobacteria
Alphaproteobacteria	Rhizobium laguerreae	JAAXTA010000001.1	HFN73_00105	gb|MBY3496969.1|	MRPLAELPAEWQVAVSGSESARRISALARQEIEDHVRKGVLQEDEELARRHADNVETLSKLDADRRQAQDDARAARAKIEADLAKHRRRRDEAERSAADLQVQLGIEQERFAAYKSTVEQEKQLMEINYRRLTDLFTEKGNRLVALGLADAEDVAALMPEMTGPEDERSGVGFTDALAGDYARLAPLLQSRLAEAGLLYSQAQLRDFLALLRTRDLIVLAGDSGSGKTSLVRAAAAAIGGVCTVIPVKPNWTGPEDLLGYYNPIERSYQATPFLLALQAAARSPHVPYFICLDEMNLARVEHYFADFLSLLESRSTAPEIHLYTADEERHVVVEQGIFLAVDAEARRRTGLPDTATLEEILRHDQANAELHRLAGLADNESVLVHHTRLRRSLAAQLRM…	HFN73_00110	gb|MBY3496970.1|	MGVLAHYLDIEWQAPGVTRRVEVSTYPIEIEVAPDGTLHAEVSIFRDFAPWVGLRLSGALAGVEPCTINAENERLPWLQVSDGNDQTWWIPETGWSKAGNKHVSEMHRSFGSFSVELGSRQKLILDAVALELDRAHAQEYLDDFRDELVWLAIGRPTGAMAEVGSDNSRDLLVALKGFTDAASRVLEHPAREIREVTGVVATARVRPNSETFRAVMRRPGARSYPGRTAQESADIPENRYLRGLVEHCRRLARSLARSSGHHQARLAARAARAKSRAADLLAVERLEVDPVIFDNQLSDIRKRLDAIATWSGSSIAPGPGERLYRFTVGKEFKVDRGAAREFFYRNPDRDDHYDEREGINFSVARLPDDLHDLVIAASRFDKDICLDLTGNAVITTFRT…	Rhizobium laguerreae	Alphaproteobacteria
Alphaproteobacteria	Rhizobium leguminosarum	JAAXDS010000008.1	HFO82_22045	gb|MBY5501281.1|	MRPLADLPTEWQVAVSGFESARRISALARREIEDHVRKVVLQEDEELARRHADNVETLSRLDADRRQAQDDARAARAKIEADLAKHRQRRDEAERSAADLQVQLGIQQERFAAYKSSVEQEKQLMEINYRRLTDLLTEKGNRLVALGLADAEDVAALMPEMMGTEDERSGVGFTDALAGDYARLAPLVQSRLAETGLLYSQAQLRDFLALLRTRDLIVLAGDSGSGKTSLVRAAAAAIGGVCTVIPVKPNWTGPEDLLGYYNPIERSYQATPFLLALQAAARRPHVPHFICLDEMNLARVEYYFADFLSLLESRSTSPEIHLYTADEERHVVVEQRIFLAMDAEARRRTGLPDTATLEEILRHDQANAELHRLGGLTDNESVLVHHTRLRRSLAAQLRI…	HFO82_22040	gb|MBY5501280.1|	MGLLAHYLDIEWQAPGVTRRVEVSTYPIEIEVAPDGTLHAEVSIFRDFAPWVGLRLSGALAGVEPCTINAENERLPWLQVSDGNDQTWWIPETGWSKAGNKHVSEMHRSFGSFSVELGSRQKLILDAVALELDRAHAQEYLDDFRDELVWLAIGRPTGALGEVGSDNSRDLLDALKGFNDAASRVLEHPAREIREVTGAVATARIRPNSETFRAVMRRPGARSYPGRTVQESADIPENRYLRGLVDHCRRLARSLARSSGHHQAHLAARVAREKSRAADLLAVERVEVDPEIFDNQLSDIRERLNAIATWSGSSVAPGPGERLYRLNVGKEFKVDRGAPKEFFYRNPDRDDRYDEREGIDFSVARLPDDLHDLVIAASRFDKDICLDVTGNAVITTFRT…	Rhizobium leguminosarum	Alphaproteobacteria
Alphaproteobacteria	Rhizobium leguminosarum	JAAXEH010000019.1	HFO50_22500	gb|MBY5603907.1|	MRPLADLPTEWQVAVFGFESARRISALARREIEDHVRKVVLQEDEELARRHADNVETLSRLDADRRQAQDDARAARAKIEADLAKHRQRRDEAERSAADLQVQLGIQQERFAAYIRSVEQEKQLMEINYRRLTDLLTEKGNRLVALGLADAEDVAALMPEMMGTEDERSGVGFTDALAGDYARLAPLLQSRLAETGLLYSQAQLRDFLALLRTRDLIVLAGDSGSGKTSLVRAAAAAIGGVCTVIPVKPNWTGPEDLLGYYNPIERSYQATPFLLALQAAARRPHVPHFICLDEMNLARVEYYFADFLSLLESRSTSPEIHLYTADEERHVVVEQRIFLAMDAEARRRTGLPDTATLEEILRHDQANAELHRLGGLTDNESVLVHHTRLRRSLASQLRM…	HFO50_22505	gb|MBY5603908.1|	MGLLAHYLDIEWQAPGVTRRVEVSTYPIEIEVAPDGTLHAEVSIFRDFAPWVGLRLSGALAGVEPCTINAENERLPWLQVSDGNDQTWWIPETGWSKAGNKHVSEMHRSFGSFSIELGSRQKLILDAVALELDRAHAQEYLDDFRDELVWLAIGRPTGALGEVGSDNSRDLLDALKGFNDAASRVLEHPAREIREVTGAVATARIRPNSETFRAVMRRPGARSYPGRTVQESADIPENRYLRGLVDHCRRLARSLARSSGHHQAHLATRVAREKSRAADLLAVERVEVDPEIFDNQLSDIRERLNAIATWSGSSVAPGPGERLYRLNVGKEFKVDRGAPKEFFYRNPDRDDRYDEREGIDFSVARLPDDLHDLVIAASRFDKDICLDVTGNAVITTFRT…	Rhizobium leguminosarum	Alphaproteobacteria
Alphaproteobacteria	Rhizobium leguminosarum	JAAXFS010000006.1	HFN53_17455	gb|MBY5873808.1|	MRPLADLPAEWQVAVSGSEAVRRISALARHEIENHVRKVVLEENEELARRHADNIETLSRLDADRRQAHDDARAAGAKIEADLAKHRQRRDEAERSAADLQVQLGIEQERFAAYKSIAEQEKQLMEINYRRLTDLLTQKGNRLVALGLADAEDVSALIPEITGRGDERSGVGFTDALAGDYARLAPLLQSRLAEVGLLYSLAQLRDFLALLRTRDLIVLAGDSGSGKTSLVRAAAAAIGGVCTVIPVKPNWTGPEDLLGYYNPIERSYQATPFLLALQAAVRSPQVPHFICLDEMNLARVEYYFADFLSLLESRSTSPEIHLYTADEERHVVVEQGIFLAVDAEVRRRTGLPDTATLEDILRHDQANAELHRLGGLADNESVLVHHARLRRSLAAQMRM…	HFN53_17460	gb|MBY5873809.1|	MDVLAHYLEIEWQAPGVARRVEVSTYPIEIEISPDGRLSAEISIFRDFAPWVGLQLAGALAGVEPCTINAENERLPWLQVSDGKDRTWWIPETGWSKAGNKHVSEMHRSFGSFSVELGPRQKLVLDAVALELDRAHAQEYLDDFTDELVWLAIGRPSGALGEVGSDNSRDLLDALKGFTDAASRVLEHPAREIREVTGVVATARVRPNSETFRAVMRRPGARSYPGRTAQESADIPENRYLRGLVEHCRRLARSLTRSSAHHQAHLAARATREKSRAANLLAVERVEVDPEIFDNQLSDMRKRLDAIATWAGSSVAPEPGERQYRFTVGKEFKGDGGAAKEFFYRNPDRDDRYDEREGINFSVARLPEDLHDLVIAASRFDKDIRLDLMGNAVITTFRT…	Rhizobium leguminosarum	Alphaproteobacteria
Gammaproteobacteria	Vibrio fluvialis	JAHUDQ010000003.1	KW472_11335	gb|MBY7957539.1|	MDDNKLTFDKSYAKQLDDKELYKCLFDAWGVQNDKIQVWGRLETNAQGNWAGIKQAKLVQTGEPIEYPLPNSRELQSGVYLHPEAAKNLLKGKNSVFIKGELRLASMRLRQSTDNPFLLELMSSNVELLTELPKFNTEDVMQSELSTLISENIYRDFLTLLESKTAVDEEKARSKIEQVEIEFKSRQENLTHLTKEIEDSLTGLKNERGLLQKQLSELGIEQNVVKSNIEQEQLTLKAIIEKQQQIEDEMSKKIERLKRYVEEKAGFLKDFEFIDEDLYAELSGNKPVSDDFMTGLSFVNDFGSDYSQLTSYLQAYLKEQGQYYSRHIIENYLTLIRTNDLVILAGDSGSGKTSLVQSFAQAVGGVAKIIPVKPNWTSSEDLLGYYNPLERKYLATPFL…	KW472_11330	gb|MBY7957538.1|	MSNANFVIKYIETRWHDKATLLEVTESQYPLSLDEVSYDSFEAFTTIYPNVEDLYRSQIAITYSDRLCSAPPAIILSDGLTMPLKKIVHPENGKVWWVEPGEWNPKSKEWRNNTHRTAGVINFRIEKQTLELHITLSDASKDQLDKYLVDFKSDMWELILDESSYVQGDTKRSIVGSVDETLLKLVDSLLSAARNVLKKPKSELREIQTLKPRKAVKPVPRTFMEIATKGNTRVLTSRGSKPNFNVSENSYVLYALMATQRIVSQLCRVSQSKTERLSHNLQKLDQRLESLKDYKEVNRDLVVKDYKMALRAVSIDNINHSIHQQLVEINSGYSSSGYSDGFLKVQKLTDKGDGYFCELKYNLNEPWGRLESARTMILSLKDNYLPLFKPYSEYRLCAR…	Vibrio fluvialis	Gammaproteobacteria
Gammaproteobacteria	Pseudoalteromonas arctica	JAEKKD010000001.1	JFJ09_01565	gb|MBZ2190896.1|	MADESYEADNDVLSNESLLGEPVKYSLDVVKDLSDEELYQRLFKCWGIKNKKIEVWGELTKQDGAVPYRLKHVRNIIDNKLIEYPIDVSYGLQSGIFVYPSIGNKYYITDQRTFVRGKLILTKLSERIKHGNPFELNLSSDDIEPLEQLPIAINEIDRLSDIDKSIVLGEGTERFIDKVIYEQQLSKLKTEFEETQKSEIETHLSRLNSMTRAVSIEKVELHAIKDSVESSKKENQQLGSESKLLRQSIEKKEHELAILDDKYKGLEEVMAKKIEKLKAFIEEKAVFLKSFEFIDDDEFNSFVSNITKVSERPEHIEFSDHLNGDYKQAVSYIQAYLKERDILYPRHIIENYLTLIRSNDLIILAGDSGSGKTNLVNSFADAVGGKSIIIPVKPNWTSS…	JFJ09_01560	gb|MBZ2190895.1|	MKAEFEAKYIDITWYDKNTVLSITESLLPLDCEYEVDKYICSTVIYPKTEGVECGQLAFRFLKKSTIKPYFVNGSGEKIVLKCVLDTETLKEWWVEADSWSSKSKRWQGKAHRTAGSIKVYLAHEVCQVNIGSYDFTLEQLDTYLADFKSDLWELILDEQSYVKGKGKTVNDGVVTQDTITLVNNLLSHSQNILKNPKAELREVQTLKPRKAVKPVNRTFMELATKGGSKLLTSRSTEPSYNVPENRYILYVLERLYKIIKQLVAISQNKTKRYESNIVKLGSRLEAFVEDKLIDKDLVKKDLEKLRDSFNTKFLSANLQEKLELFNQRGLEEQNTSICFLKIGSKTKGGDSRFLAIKKEYSDNWFETEVATQNVFLKQGEPLFLNLLEQGFEYKIMGN…	Pseudoalteromonas arctica	Gammaproteobacteria
Gammaproteobacteria	Klebsiella michiganensis	VNSN01000052.1	FMJ19_28245	gb|MBZ7352204.1|	MALEQVIYNLEEVKGLSDEELYQRLYDSWGLENHKIDVWGELSINEAGNWAGIRNAKTLSGNQSIEYPLADSHELQSGVFLTPSVAKIVLGNDTKGMVACELMLASIPQRAKKNNPFLLAVNDKTVERLTYLPDALPNLDRQALIQNEDETLLRKVIYDAEVKRVKHKIASETEALEAALQEKQQDMTDKLAELSDAFKSTQDKITASTTELESSIKRNEELNNDNHRLNLKIQESKAELDVIIEKSRKVEESMARKVEKLTDFIKEKAIFLKSFEFLDEEDFDFFVGSPLSNKERGEHISFSQALYSNYSDAVSYIQAYLKERDILYPRHIIENFLTLIRTNDLIILAGDSGSGKTNLVQSFAKAIGGVSKIIPVKPNWTSSEDLLGYYNPLEKKYLA…	FMJ19_28240	gb|MBZ7352203.1|	MEAPFVIKFIETKWHDKQTLVSVSESEYSLKLEQTGNNAFSAHTTIYPKVDELRFAQLAIKTKQGDQSPPYIAMPNGERRQLESITDPASNEEWWVEPAHWDAKQRVWRSEARRTAGQIMFVIGSSTLKLDIDISEQTKSDLSRYLSDFKADLWELILDESSHITGDAKNSQVAAIDQEALSLVASILSNAQTILKKPKVELKEIQALKPAKEVRPVPRTFMEICTKGSRKHLTSRASEPSYNVPENQYVLYVVSSTLSIVKQLVKVAESKKSRFSGAIEKLNERLDSLKDYRIINRDLVVKDLERLKKRFDTEVINAELSEQLAKINVNLSRSYSEKGYLRLEKATGSENEWWAKIKPSQNDDWQQFEPDGYTIFSSRDHYASLFKSYSDYEIEAKIP…	Klebsiella michiganensis	Gammaproteobacteria
Gammaproteobacteria	Klebsiella pneumoniae	JAIXDL010000035.1	K1S82_26125	gb|MCA5084810.1|	MALEQVIYNLEEVKGLSDEELYQRLYDSWGLENHKIDVWGELSINEAGNWAGIRNAKTLSGNQSIEYPLADSHELQSGVFLTPSVAKIVLGNDTKGMVACELMLASIPQRAKKNNPFLLAVNDKTVERLTYLPDALPNLDRQALIQNEDETLLRKVIYDAEVKRVKHKIASETEALEAALQEKQQDMTDKLAELSDAFKSTQDKITASTTELESSIKRNEELNNDNHRLNLKIQESKSELDVIIEKSRKVEESMARKVEKLTDFIKEKAIFLKSFEFLDEEDFDFFVGSPLSNKERGEHISFSQALYSNYSDAVSYIQAYLKERDILYPRHIIENFLTLIRTNDLIILAGDSGSGKTNLVQSFAKAIGGVSKIIPVKPNWTSSEDLLGYYNPLEKKYLA…	K1S82_26120	gb|MCA5084809.1|	MEAPFVIKFIETKWHDKQTLVSVSESEYSLKLEQTGNNAFSAHTTIYPKVDELRFAQLAIKTKQGDQSPPYIAMPNGERRQLESITDPASNEEWWVEPAHWDAKQRVWRSEARRTAGQIMFVIGSSTLKLDIDISEQTKSDLSRYLSDFKADLWELILDESSHITGDAKNSQVAAIDQEALSLVASILSNAQTILKKPKVELKEIQALKPAKEVRPVPRTFMEICTKGSRKHLTSRASEPSYNVPENQYVLYVVSSTLSIVKQLVKVAESKKSRVSGAIEKLNERLDSLKDYRIINRDLVVKDLERLKKRFDTEVINAELSEQLAKINVNLSRSYSEKGYLRLEKATGSENEWWAKIKPSQNDDWQQFEPDGYTIFSSRDHYASLFKSYSDYEIEAKIP…	Klebsiella pneumoniae	Gammaproteobacteria
Gammaproteobacteria	Klebsiella pneumoniae	JAIXDG010000035.1	K1S09_26230	gb|MCA5115890.1|	MALEQVIYNLEEVKGLSDEELYQRLYDSWGLENHKIDVWGELSINEAGNWAGIRNAKTLSGNQSIEYPLADSHELQSGVFLTPSVAKIVLGNDTKGMVACELMLASIPQRAKKNNPFLLAVNDKTVERLTYLPDALPNLDRQALIQNEDETLLRKVIYDAEVKRVKHKIASETEALEAALQEKQQDMTDKLAELSDAFKSTQDKITASTTELESSIKRNEELNNDNHRLNLKIQESKSELDVIIEKSRKVEESMARKVEKLTDFIKEKAIFLKSFEFLDEEDFDFFVGSPLSNKERGEHISFSQALYSNYSDAVSYIQAYLKERDILYPRHIIENFLTLIRTNDLIILAGDSGSGKTNLVQSFAKAIGGVSKIIPVKPNWTSSEDLLGYYNPLEKKYLA…	K1S09_26225	gb|MCA5115889.1|	MEAPFVIKFIETKWHDKQTLVSVSESEYSLKLEQTGNNAFSAHTTIYPKVDELRFAQLAIKTKQGDQSPPYIAMPNGERRQLESITDPASNEEWWVEPAHWDAKQRVWRSEARRTAGQIMFVIGSSTLKLDIDISEQTKSDLSRYLSDFKADLWELILDESSHITGDAKNSQVAAIDQEALSLVASILSNAQTILKKPKVELKEIQALKPAKEVRPVPRTFMEICTKGSRKHLTSRASEPSYNVPENQYVLYVVSSTLSIVKQLVKVAESKKSRVSGAIEKLNERLDSLKDYRIINRDLVVKDLERLKKRFDTEVINAELSEQLAKINVNLSRSYSEKGYLRLEKATGSENEWWAKIKPSQNDDWQQFEPDGYTIFSSRDHYASLFKSYSDYEIEAKIP…	Klebsiella pneumoniae	Gammaproteobacteria
Gammaproteobacteria	Klebsiella pneumoniae	JAIXDY010000037.1	K1S47_26250	gb|MCA5162206.1|	MALEQVIYNLEEVKGLSDEELYQRLYDSWGLENHKIDVWGELSINEAGNWAGIRNAKTLSGNQSIEYPLADSHELQSGVFLTPSVAKIVLGNDTKGMVACELMLASIPQRAKKNNPFLLAVNDKTVERLTYLPDALPNLDRQALIQNEDETLLRKVIYDAEVKRVKHKIASETEALEAALQEKQQDMTDKLAELSDAFKSTQDKITASTTELESSIKRNEELNNDNHRLNLKIQESKSELDVIIEKSRKVEESMARKVEKLTDFIKEKAIFLKSFEFLDEEDFDFFVGSPLSNKERGEHISFSQALYSNYSDAVSYIQAYLKERDILYPRHIIENFLTLIRTNDLIILAGDSGSGKTNLVQSFAKAIGGVSKIIPVKPNWTSSEDLLGYYNPLEKKYLA…	K1S47_26255	gb|MCA5162207.1|	MEAPFVIKFIETKWHDKQTLVSVSESEYSLKLEQTGNNAFSAHTTIYPKVDELRFAQLAIKTKQGDQSPPYIAMPNGERRQLESITDPASNEEWWVEPAHWDAKQRVWRSEARRTAGQIMFVIGSSTLKLDIDISEQTKSDLSRYLSDFKADLWELILDESSHITGDAKNSQVAAIDQEALSLVASILSNAQTILKKPKVELKEIQALKPAKEVRPVPRTFMEICTKGSRKHLTSRASEPSYNVPENQYVLYVVSSTLSIVKQLVKVAESKKSRVSGAIEKLNERLDSLKDYRIINRDLVVKDLERLKKRFDTEVINAELSEQLAKINVNLSRSYSEKGYLRLEKATGSENEWWAKIKPSQNDDWQQFEPDGYTIFSSRDHYASLFKSYSDYEIEAKIP…	Klebsiella pneumoniae	Gammaproteobacteria
Cyanobacteriota	Pseudanabaena sp. M53BS1SP1A06MG	JADBWH010000039.1	IM549_07555	gb|MCA6573088.1|	MTELNQDPFDARWLNCLYGGKLAGRAKIVTDAIVLIEPLLVITLSDGTKVKKFFGLRKNCSSDKLIKDDYVIFDWRNVGERSYDRKREEEGDPEAIEIEVVTKNIAEEVATQLRRLHPNKLREQWDIHLSLIEEKKANINAHAEEIALVRTEEKLNELKEYKKQLIREEEFLKQKEKELEMREIAIPEEVAKLVKSRTAEFTKQVQEKLSELNRERESVKKQQESLNLQRHNLNQEVEELATTRTREIQEQFEAKQKQLTREIQSLADRTKQFLVRQEQLKLQEAQLLEIRQQIEPYRLAVPVEILPNRVIEPVQLPSKLGTKWHQQLQKEGLQVSRNIANSFLLSMLSGFYSGGIVLLNGSVGVGKTSIVKHSAKLIGGSCAIIPVRPAWIEPADLLG…	IM549_07550	gb|MCA6573087.1|	MANYPTIKFVDDRGNVLPTDEDGLQHIQQFRQFWQLYLSDRWLGKVRLLGNPNIDLLNVAKTNYWQFKNNQIPPSIISSAGIVTIILIDDKGNQIEATKTRLAIHPASLTDSQLDRMIADIGTLALSVSSCVNREIKILTAQASGETGYGQKWSPYQGMLTTADALIELTSVMQQNWIALEKRSLKDIETTIGKVSRSRVYTSPKLLITAYSQPVKQNFMGMVRTETTNCSENQFLCYLLDIYLQDIANGIISSLKALKIDNVERRLIPSRRSSDHQLTKFWEDAQKNIDQRAQKINQFELSVEDKIKQLQECLVWAKYARNSPFLKNITTPHILPNHSLRLTGSPAYGAIYACYSSTQGHLLENLQQQILSFENLTPKNIKPVWEIYEIWCFVSIYSA…	Pseudanabaena sp. M53BS1SP1A06MG	Cyanobacteriota
Cyanobacteriota	Pseudanabaena sp. M38BS1SP1A06MG	JADBWG010000102.1	IM535_11975	gb|MCA6592797.1|	MTELNQDPFDARWLNCLYGGKLAGRAKIVTDAIVLIEPLLVITLSDGTKVKKFFGLRKNCSSDKLIKDDYVIFDWRNVGERSYDRKREEEGDPEAIEIEVVTKNIAEEVATQLRRLHPNKLREQWDIHLSLIEEKKANINAHAEEIALVRTEEKLNELKEYKKQLIREEEFLKQKEKELEMREIAIPEEVAKLVKSRTAEFTKQVQEKLSELNRERESVKKQQESLNLQRHNLNQEVEELATTRTREIQEQFEAKQKQLTREIQSLADRTKQFLVRQEQLKLQEAQLLEIRQQIEPYRLAVPVEILPNRVIEPVQLPSKLGTKWHQQLQKEGLQVSRNIANSFLLSMLSGFYSGGIVLLNGSVGVGKTSIVKHSAKLIGGSCAIIPVRPAWIEPADLLG…	IM535_11970	gb|MCA6592796.1|	MANYPTIKFVDDRGNVLPTDEDGLQHIQQFRQFWQLYLSDRWLGKVRLLGNPNIDLLNVAKTNYWQFKNNQIPPSIISSAGIVTIILIDDKGNQIEATKTRLAIHPASLTDSQLDRMIADIGTLALSVSSCVNREIKILTAQASGETGYGQKWSPYQGMLTTADALIELTSVMQQNWIALEKRSLKDIETTIGKVSRSRVYTSPKLLITAYSQPVKQNFMGMVRTETTNCSENQFLCYLLDIYLQDIANGIISSLKALKIDNVERRLIPSRRSSDHQLTKFWEDAQKNIDQRAQKINQFELSVEDKIKQLQECLVWAKYARNSPFLKNITTPHILPNHSLRLTGSPAYGAIYACYSSTQGHLLENLQQQILSFENLTPKNIKPVWEIYEIWCFVSIYSA…	Pseudanabaena sp. M38BS1SP1A06MG	Cyanobacteriota
Cyanobacteriota	Pseudanabaena sp. M046S1SP1A06QC	JADBWE010000026.1	IM539_04520	gb|MCA6595585.1|	MTELNQDPFDARWLNCLYGGKLAGRAKIVTDAIVLIEPLLVITLSDGTKVKKFFGLRKNCSSDKLIKDDYVIFDWRNVGERSYDRKREEEGDPEAIEIEVVTKNIAEEVATQLRRLHPNKLREQWDIHLSLIEEKKANINAHAEEIALVRTEEKLNELKEYKKQLIREEEFLKQKEKELEMREIAIPEEVAKLVKSRTAEFTKQVQEKLSELNRERESVKKQQESLNLQRHNLNQEVEELATTRTREIQEQFEAKQKQLTREIQSLADRTKQFLVRQEQLKLQEAQLLEIRQQIEPYRLAVPVEILPNRVIEPVQLPSKLGTKWHQQLQKEGLQVSRNIANSFLLSMLSGFYSGGIVLLNGSVGVGKTSIVKHSAKLIGGSCAIIPVRPAWIEPADLLG…	IM539_04515	gb|MCA6595584.1|	MANYPTIKFVDDRGNVLPTDEDGLQHIQQFRQFWQLYLSDRWLGKVRLLGNPNIDLLNVAKTNYWQFKNNQIPPSIISSAGIVTIILIDDKGNQIEATKTRLAIHPASLTDSQLDRMIADIGTLALSVSSCVNREIKILTAQASGETGYGQKWSPYQGMLTTADALIELTSVMQQNWIALEKRSLKDIETTIGKVSRSRVYTSPKLLITAYSQPVKQNFMGMVRTETTNCSENQFLCYLLDIYLQDIANGIISSLKALKIDNVERRLIPSRRSSDHQLTKFWEDAQKNIDQRAQKINQFELSVEDKIKQLQECLVWAKYARNSPFLKNITTPHILPNHSLRLTGSPAYGAIYACYSSTQGHLLENLQQQILSFENLTPKNIKPVWEIYEIWCFVSIYSA…	Pseudanabaena sp. M046S1SP1A06QC	Cyanobacteriota
Cyanobacteriota	Pseudanabaena sp. M57BS1SP1A06MG	JADBWF010000212.1	IM537_14270	gb|MCA6601329.1|	MTELNQDPFDARWLNCLYGGKLAGRAKIVTDAIVLIEPLLVITLSDGTKVKKFFGLRKNCSSDKLIKDDYVIFDWRNVGERSYDRKREEEGDPEAIEIEVVTKNIAEEVATQLRRLHPNKLREQWDIHLSLIEEKKANINAHAEEIALVRTEEKLNELKEYKKQLIREEEFLKQKEKELEMREIAIPEEVAKLVKSRTAEFTKQVQEKLSELNRERESVKKQQESLNLQRHNLNQEVEELATTRTREIQEQFEAKQKQLTREIQSLADRTKQFLVRQEQLKLQEAQLLEIRQQIEPYRLAVPVEILPNRVIEPVQLPSKLGTKWHQQLQKEGLQVSRNIANSFLLSMLSGFYSGGIVLLNGSVGVGKTSIVKHSAKLIGGSCAIIPVRPAWIEPADLLG…	IM537_14265	gb|MCA6601328.1|	MANYPTIKFVDDRGNVLPTDEDGLQHIQQFRQFWQLYLSDRWLGKVRLLGNPNIDLLNVAKTNYWQFKNNQIPPSIISSAGIVTIILIDDKGNQIEATKTRLAIHPASLTDSQLDRMIADIGTLALSVSSCVNREIKILTAQASGETGYGQKWSPYQGMLTTADALIELTSVMQQNWIALEKRSLKDIETTIGKVNRSRVYTSPKLLITAYSQPVKQNFMGMVRTETTNCSENQFLCYLLDIYLQDIANGIISSLKALKIDNVERRLIPSRRSSDHQLTKFWEDAQKNIDQRAQKINQFELSVEDKIKQLQECLVWAKYARNSPFLKNITTPHILPNHSLRLTGSPAYGAIYACYSSTQGHLLENLQQQILSFENLTPKNIKPVWEIYEIWCFVSIYSA…	Pseudanabaena sp. M57BS1SP1A06MG	Cyanobacteriota
Cyanobacteriota	Pseudanabaena sp. M007S1SP1A06QC	JADBWA010000161.1	IM533_05310	gb|MCA6603898.1|	MTELNQDPFDARWLNCLYGGKLAGRAKIVTDAIVLIEPLLVITLSDGTKVKKFFGLRKNCSSDKLIKDDYVIFDWRNVGERSYDRKREEEGDPEAIEIEVVTKNIAEEVATQLRRLHPNKLREQWDIHLSLIEEKKANINAHAEEIALVRTEEKLNELKEYKKQLIREEEFLKQKEKELEMREIAIPEEVAKLVKSRTAEFTKQVQEKLSELNRERESVKKQQESLNLQRHNLNQEVEELATTRTREIQEQFEAKQKQLTREIQSLADRTKQFLVRQEQLKLQEAQLLEIRQQIEPYRLAVPVEILPNRVIEPVQLPSKLGTKWHQQLQKEGLQVSRNIANSFLLSMLSGFYSGGIVLLNGSVGVGKTSIVKHSAKLIGGSCAIIPVRPAWIEPADLLG…	IM533_05305	gb|MCA6603897.1|	MANYPTIKFVDDRGNVLPTDEDGLQHIQQFRQFWQIYLSDRWLGKVRLLGNPNIDLLNVAKTNYWQFKNNQIPPSIISSAGIVTIILIDDKGNQIEATKTRLAIHPASLTDSQLDRMIADIGTLALSVSSCVNREIKILTAQASGETGYGQKWSPYQGMLTTADALIELTSVMQQNWIALEKRSLKDIETTIGKVNRSRVYTSPKLLIKAYSQPAKQNFMGMVRTETTNCSENQFLCYLLDIYLQDVAQGVISSLKALKIDNVESRLIPSRRSDSDFTKFRDNIQKTVNQRTKRINQFELSVKEKIKQLQECQIWAKYARNSSFLRNISTPHTLPNHSLRLTGAPAYGAIYACYSSTQGHLLENLQQQILSFENLTPKNIKPVWEIYEIWCFVSIYSAF…	Pseudanabaena sp. M007S1SP1A06QC	Cyanobacteriota
Cyanobacteriota	Pseudanabaena sp. M090S1SP1A06QC	JADBVZ010000078.1	IM531_12525	gb|MCA6615481.1|	MTELNQDPFDARWLNCLYGGKLAGRAKIVTDAIVLIEPLLVITLSDGTKVKKFFGLRKNCSSDKLIKDDYVIFDWRNVGERSYDRKREEEGDPEAIEIEVVTKNIAEEVATQLRRLHPNKLREQWDIHLSLIEEKKANINAHAEEIALVRTEEKLNELKEYKKQLIREEEFLKQKEKELEMREIAIPEEVAKLVKSRTAEFTKQVQEKLSELNRERESVKKQQESLNLQRHNLNQEVEELATTRTREIQEQFEAKQKQLTREIQSLADRTKQFLVRQEQLKLQEAQLLEIRQQIEPYRLAVPVEILPNRVIEPVQLPSKLGTKWHQQLQKEGLQVSRNIANSFLLSMLSGFYSGGIVLLNGSVGVGKTSIVKHSAKLIGGSCAIIPVRPAWIEPADLLG…	IM531_12530	gb|MCA6615482.1|	MANYPTIKFVDDRGNVLPTDEDGLQHIQQFRQFWQIYLSDRWLGKVRLLGNPNIDLLNVAKTNYWQFKNNQIPPSIISSAGIVTIILIDDKGNQIEATKTRLAIHPASLTDSQLDRMIADIGTLALSVSSCVNREIKILTAQASGETGYGQKWSPYQGMLTTADALIELTSVMQQNWIALEKRSLKDIETTIGKVNRSRVYTSPKLLIKAYSQPAKQNFMGMVRTETTNCSENQFLCYLLDIYLQDVAQGVISSLKALKIDNVESRLIPSRRSDSDFTKFRDNIQKTVNQRTKRINQFELSVKEKIKQLQECQIWAKYARNSSFLRNISTPHTLPNHSLRLTGAPAYGAIYACYSSTQGHLLENLQQQILSFENLTPKNIKPVWEIYEIWCFVSIYSAF…	Pseudanabaena sp. M090S1SP1A06QC	Cyanobacteriota
Gammaproteobacteria	Shewanella sp. SR1	JAJAEF010000005.1	KV201_05935	gb|MCB2381710.1|	MSNADIIYSFDVVKDLSDDELYKKLYESWGITNGKIEVWGELVDPQTSKFINLYKVRLITNNQTIKYPINLRHGIESGVYAPYDYAKSLLSTKPSVWVKCELELSPLKERQKHNNPFELSIKIGSAEVLQALPIAFDKSQLIEGEETSYIVKSIHDFHIASLQQQFEDTERKLQKELSNITSKNAESIATLEAEKLQAINKLIDEHNSNKQRMELELAKVNISLTELEKKENSLKLNTQKLNSELSQRQTELKFLKVQYKEIQLEMAKKIEKLKSYIAEKALFLKDFEFIDEDDFDSFIFDAVKERDTTQMVSFDEVLKGDYKLAVSYIQAFLKEQGILYPRHVIENYLTLIRSNDLIILAGDSGSGKTNLVQSFAKAVGGVSKIIPVKPNWTSSEDLL…	KV201_05940	gb|MCB2381711.1|	MKPHFEVKYLDLIWYDKNTLTKVTESISGLQIQYDDAKSQFECETTIYPNAKGVDRGQLAIRFLNNKIAKPYIDMPNGNVKYLTPIKDVDTGRTWWIVADEWDQKSKVWRSIAPNIVGSIKFSLQGKPCILAIAGADFTLEQLESYLSSFKNDLWELILDESSAVQANAKTSNAIGVNDKIIECINNLVSHAEKVLITPKAELREVQALKPRKAVKPVNRTFMELASKTNQRFLTSRATDSTFNVAENRYVLFALERCYRIVKQVTILANNKAERYKDTVTKLENQHNNFSDSVLVERELVVNDLKKLAEQCHIDYWQKLFTNKLDNSGIQFSEHGQFEEFFIRIESLTKDGDGFFIKVWDGSVWGDVDGKYSIISFRHNESYAPLLSVLQHGMILQII…	Shewanella sp. SR1	Gammaproteobacteria
Gammaproteobacteria	Acinetobacter soli	JAJDJX010000006.1	LIO09_08580	gb|MCB8768859.1|	MNEIIYTEDELKDYSDQELLAMLAKSWDVEDGKFEVWGELQPAVGDKSHGYLRDSYLIKTGKKLYYPLYGSDQDACSFFVTSQDVVRDGSKKKRRYIRCELELAPKAERVKHKNPLELCVKKGAIENLHFIPQEIPQEILIDLDSKNERSQFISKSIYDFYYKKAMGDMDQEIKQRRSEIEAQIAEKEIELQQLNEKGMTDLKQTEEQWDVVRNLLNKLNAEKGELEIINEKLSQDKQLRQNELNNLTKRFEQIEGEMNNKIQRLKSYVAEKAQFLKTFEFVDEDDINLFLHQSKPLIERVEGLSFNNVLNSDYQKAVSYIHAHLVEMEYMYPRHIIENYLTLLRTKDLIILAGDSGSGKTNLVKSFAKAVGGKSIIIPVKPNWTSSEDLLGYYNPLEK…	LIO09_08585	gb|MCB8768860.1|	MDLYFEIKYLELKWYNQDILTKVTESLVPLSVEYNEHLGIHQVETTIYPKVEGVKRGVLAVRFLNQTSDKPYVELPNGEKKYLSSIKDPETGLEWWFLKERWVEDLNHWSSIAPNIAGMVRLMLQGKICKVLINGSDFTLEQLERYLKVFKNDLWELILDESSVVQGKAKGGQIEGIGEEAIKCIESLVAHAHKVLINPKVELREIQSLKPRKEVRPVNRTFMEISTKANQKYLTSRATESSYNVPENRYVLFALERCYRIIKQIVILAGNKMERFKLQADKLRAQHDALKDHSKVDRDLVVADLRRIGQQGKKEYWQSHIDTLVAHYKIPLSDEPLSEKLRIKIEGATHRGDGFFFQIWSNDRYKKPVDRYYVLALGGEFEGLLKVIETGMELEFDCE…	Acinetobacter soli	Gammaproteobacteria
Gammaproteobacteria	Moraxellaceae bacterium	JAJFBF010000042.1	K0Q68_1955	gb|MCC2638236.1|	MGDYVAIETEQQAADFAESGKDAPPDSPSIEWSEPDLRRYLAKIWRQSDPLHIKIIGRLQRVEGKNFGILVDLHHAETGDKLVHPLENSGRRCSAFVPPSELVRPQSLWGSETFFTAELDFSPLSERKKKGDPFACMVRAGTLEPLSHIPDDWWKVQNIQSEKLPLILEKVRDAILDKVRRDTSDAKDDLIAAKRAVDLAKQEKTALEEEYERTNSEIDQQRDRIAALEAEYLERSTALESGFRELEAFLKEKGDRMVALRLIDRADLAKVFPPLEKADVRSGHRFQEALDGSLQRLASYIQAHLWRKGIRYTKAQLLNFITLLGTNDLIVLAGDSGSGKTSLVKSVASAIGGRCAVVPVKPNWTGSEDLLGYYNPIERRYHPSQFLLALLEASREPEI…	K0Q68_1954	gb|MCC2638235.1|	MSSEVEVRYLLIEWQAEGVARKVEVAPSSLEVELCADGGYLVETAIFNDFHPWVGVRFLSGRESASAPTFVSASGQEMPMMQVSVDGSGTWWVRSDGWDLLQKRHVTELQRSPGLYKVRIGDTWLRIDNRLSAYGKADIQAYVDDFRGDLLWMILNDAAAATASGRGIGASSEFLTALSQFASALERVLESPAVNIREVLAPQPVERLRPGATTFPSYMRNSSARRLIGRSFTESADTAENRYLRHMIGVCCTWANAYVMAASRQIGFLGRLAELEAKTARSNREMTERPVDPDVFDQQTADLNERLAAVVSYSGQSTNEDGGARDRSFPLRLKARYFDHLAFYYEPQQGLVQSRVSKVDYRYVELPKDAFELIYRAHHFCKQFTITGLASSIQGATAS…	Moraxellaceae bacterium	Gammaproteobacteria
Gammaproteobacteria	Klebsiella pneumoniae	JAJHGT010000040.1	LMI99_26585	gb|MCC4939243.1|	MALEQVIYNLEEVKGLSDEELYQRLYDSWGLENHKIDVWGELSINEAGNWAGIRNAKTLSGNQSIEYPLADSHELQSGVFLTPSVAKIVLGNDTKGMVACELMLASIPQRAKKNNPFLLAVNDKTVERLTYLPDALPNLDRQALIQNEDETLLRKVIYDAEVKRVKHKIASETEALEAALQEKQQDMTDKLAELSDAFKSTQDKITASTTELESSIKRNEELNNDNHRLNLKIQESKAELDVIIEKSRKVEESMARKVEKLTDFIKEKAIFLKSFEFLDEEDFDFFVGSPLSNKERGEHISFSQALYSNYSDAVSYIQAYLKERDILYPRHIIENFLTLIRTNDLIILAGDSGSGKTNLVQSFAKAIGGVSKIIPVKPNWTSSEDLLGYYNPLEKKYLA…	LMI99_26580	gb|MCC4939242.1|	METPFVIKFIETKWHDKQTLVSVSESEYSLKLEQTGNNAFSAHTTIYPKVDELRFAQLAIKTKQGDQSPPYIVMPNGDRKQLESITDPASNAVWWVEPAHWDAKQRVWRSEARRTAGQITFVIGNSTLKLDIDISEQTKSDLSRYLSDFKADLWELILDENSHITGDAKNSQVAAIDQEALSLVASILSNAQTILKKPKVELKEIQALKPAKEVRPVPRTFMEICTKGSRKHLTSRASEPSYNVPENQYVLYVVSSTLSIVKQLVKVAESKKSRFSGAIEKLNERLDSLKDYRIINRDLVVKDLERLKKRFDTEVINAELASQLGEINANKYFSPKHAAKGYLRLEKTTGSENEWWAKIKPSQHDDWQQFELDGYTIFSSGEYYASLFQPYSDYDMVAI…	Klebsiella pneumoniae	Gammaproteobacteria
Gammaproteobacteria	Klebsiella pneumoniae	JADCPQ010000183.1	INR16_24950	gb|MCC7835109.1|	MALEQVIYNLEEVKGLSDEELYQRLYDSWGLENHKIDVWGELSINEAGNWAGIRNAKTLSGNQSIEYPLADSHELQSGVFLTPSVAKIVLGNDTKGMVACELMLASIPQRAKKNNPFLLAVNDKTVERLTYLPDALPNLDRQALIQNEDETLLRKVIYDAEVKRVKHKIASETEALEAALQEKQQDMTDKLAELSDAFKSTQDKITASTTELESSIKRNEELNNDNHRLNLKIQESKSELDVIIEKSRKVEESMARKVEKLTDFIKEKAIFLKSFEFLDEEDFDFFVGSPLSNKERGEHISFSQALYSNYSDAVSYIQAYLKERDILYPRHIIENFLTLIRTNDLIILAGDSGSGKTNLVQSFAKAIGGVSKIIPVKPNWTSSEDLLGYYNPLEKKYLA…	INR16_24955	gb|MCC7835110.1|	MEAPFVIKFIETKWHDKQTLVSVSESEYSLKLEQTGNNAFSAHTTIYPKVDELRFAQLAIKTKQGDQSPPYIAMPNGERRQLESITDPASNEEWWVEPAHWDAKQRVWRSEARRTAGQIMFVIGSSTLKLDIDISEQTKSDLSRYLSDFKADLWELILDESSHITGDAKNSQVAAIDQEALSLVASILSNAQTILKKPKVELKEIQALKPAKEVRPVPRTFMEICTKGSRKHLTSRASEPSYNVPENQYVLYVVSSTLSIVKQLVKVAESKKSRFSGAIEKLNERLDSLKDYRIINRDLVVKDLERLKKRFDTEVINAELSEQLAKINVNLSRSYSEKGYLRLEKATGSENEWWAKIKPSQNDDWQQFEPDGYTIFSSRDHYASLFKSYSDYEIEAKIP…	Klebsiella pneumoniae	Gammaproteobacteria
Gammaproteobacteria	Acinetobacter junii	VYTC01000088.1	F4T90_15775	gb|MQZ58772.1|	MENQITYTLQQLKNLNDDQIFLELKKIWGYKENESLRVIGQINRKSNFSQIYTLSNLKDSKGNSLLYPLENFKEDHGCFIGLSLPNTVEIGQWVQATLKLAPKKEREKHSNPFELNVQISSLKKLVEIPSKVIEDGIHDDLIENWVIEYFAEKNAEEITEKNKSVLMQHEILLKKEEELEKNLKSLEKKEISFLDKLAKNQEKIELCKLELEENKELVNAEKVELKKNKDLIIQAQAELISLKHQKEEILNKLNNFIEEKVNILRELEIIDEDSLHKLIGKNNTPVQLETHYLLGKDIKDIEEVIKHIQAYLYNKGTMYRRNILENFYTLLSTRDLIILAGDSGAGKTNLVKSFAEATGGKHYIIPVKPNWTSSEDLLGYYNPVEQNYLSTPFLTALID…	F4T90_15780	gb|MQZ58773.1|	MLISARYIDVEWNATKQVKKVFYGSPIEIIKKSENNFFIETITFPKRFFYFAFRIEEPISNPPYFLFNEIKEDLLEIIDPKTGENWWIAKGRWISESKKRNYGNKYVHESFRTAGRLELHINDITIEISNRTNNFSVEEMEFFLTDFKNELWSIILNSESVVNAELQKSTPNIFNEDTILYVENCLNSVQKILNDPKFFLVENQQLVIKKKVKPVRRTFRELTTKPNSKTFTSRIHDKSYNNSENRYIHFCTEKLFFIFNKMLQVVERSNIQFSNMAKIYFEESDRLKNSDFKIIDKDLFIQEAYEIKQRSLNFYTELEKLNNNLLPSFLDEILKLNSKILNRNESGNEKLITYRFTLDQIFEYLDHSIQSRFLNGKEFETHPEYHIYNGKYLVVEFPD…	Acinetobacter junii	Gammaproteobacteria
Cyanobacteriota	Dolichospermum sp. UHCC 0260	VIKZ01000004.1	FJR08_02775	gb|MTJ33531.1|	MTENDEQEFNKLLAKPDSELIKDILVYNQIPSLVLSGVLTVNPGSRYGYFKSVLDHNGRKIKYPNGNDLDDIFIYDPYELEKDERYYFECELASLNEKRKRNNPYLLKTTVDRVQQGEKLNSLVKAIEEKNYEINELNEAIKYCEETIAQKITEISKNESFISELSEKIESNKIQLDQIINQKTEMENTIKILQQKINICRKLEFLSEDEERQYISLSREKYVIPSNYLSFENELESSFAKLADHVHQYLFCEKNLIYTRFQIRNFLTLLRTNDLIVLSGLSGSGKTQIVKAFAEALGGVAKIIPVKPNWTSSDDLLGYYNPIQMSFLPTPFTEAIVEAIHNPDQLYLICLDEMNLARVEYYFADFLSKLEERSSQPEIELYAKHEEELFISEFKTLLN…	FJR08_02780	gb|MTJ33532.1|	MMKDFEVLMISIEWESCDKYLSITKSARPLKPTIKAGNINTYEYDIVLYTKEDGKYFQFCVKTPHTPFLKGSDGKYHDPLFNLKDDLWIIKGEEWEIGQRGIGYHHCPSINTIGKIEIGILDNLKQIKDFISIDINSNILDFDFEQLKNDFEGELWNLITSQKSKITSSRLELRYYDKIFCYSESKSIIDFLKAYDAIEKKPKSELLTSKGIAKIEKVKPIAETYRKLVSIGGSARVLPSKTFIENYDIYENRYLCLMLNSIYKIVSNNINYTKKQLESLEYKINDKKAKIKVLNDPNPPVNREEIIEEILLQEKKVQNMEEEWQNISRNMPFDSQQKFYTLSIYIKYKDKKSNSGFWCKTDKTAFCLINFPYACLNYLEEEQKYTFEFSFIKDRDIRV…	Dolichospermum sp. UHCC 0260	Cyanobacteriota
Gammaproteobacteria	Aliivibrio fischeri	WOBL01000009.1	GNP70_06280	gb|MUK68987.1|	MSEEKSNQEGLLTPKQGVKYSAEVLKNLSDIELHQKLCDEWGFSNKKITVWARLRRVSGVVEYTVDNIHHALTNERLEYPYDAKYPLRNGVFISKSAGRFFFKDEEDTYIKAELELSPKRERDKHNNPFELNVVSSSVELLVELPIDITEHKNILENTSGMFFSNDVEVFISQAVYDRQLSKMTTDFEVIKQRHEDELTSSVDKIKRTIEENEKENTNLVETISENHEKNKLLRLENKQTEKIILEQKETTERYRSEIQELKVQLSKLENDMSQKIERLKNYVVEKAGFLKDFEFIDEDVYFQLTEQKTDQDIDRSNFLSFINDFEADYGKVAAYLQAYLKDQGQYYSRHIVENYLTLLRTNDLIILAGDSGSGKTSLVQSFAKAVGGVAKIIPVKPNW…	GNP70_06275	gb|MUK68986.1|	MSNVPIVLKYIETRWHDKDTLVRLTESQYPLKIELNEDGLYEANTTIYPKVSDLNYSQLAINLGKDIENVTPYIIGPNNQKLPMKKIVDPVLEKIWWVETGEWNDEFKAWVTNTRRTAGNIEFQVGTQRLSLHIGFSEASKEDLEKYLTDFKSDMWELILDDNSYIQAEAKEGQVGGVDESTLRFINNILKCGKKLLQQPKSELREVQTLKPRKAVKPVPRTFMEISTRGNCKTLTSRDSEPNYNVAENRYALYVLLATSRIVSQLVQVSKSKSERFSNSLLKLEERLASLKDYKEINRDLVVKDYNRAKKSVDVNVINEKTLVELNIINGSNILTGNVGYISIQGKNRYNGFFCKIKNQEHEEWGNIRGYSSTAINIPERYKDLLIPYTDYYMQAEID…	Aliivibrio fischeri	Gammaproteobacteria
Gammaproteobacteria	Aliivibrio fischeri	WOBV01000003.1	GNP89_01185	gb|MUL00827.1|	MSEEKSNQEGLLAPKQGVKYSDEVLKNLSDIELHQKLCDEWGFSNKKITVWARLRRVSGVVEYTVDNIHHALTNERLEYPYDAKYPLRNGVFISKSAGRFFFKDEEDTYIKAELELSPKRERDKHNNPFELNVVSSSVELLVELPIDITEHKNVLENTSGMVFSNDVEVLISQAVYDRQLSKMTTDFEVIKQRHEDELTSSVDKIRRTIEENEKENTNLVETISENYEKNKLLKLENKQTEKIILEQKETTERYRSEIQELKVQFSKLENDMSQKIERLKHYVVEKAGFLKDFEFIDEDVYFQLTEQKTEQDIDRSNFLSFINDFEADYGKVAAYLQAYLKDQGQYYSRHIVENYLTLLRTNDLIILAGDSGSGKTSLVQSFAKAVGGVAKIIPVKPNW…	GNP89_01190	gb|MUL00828.1|	MSNVPIVLKYIETRWHDKDTLVRLTESQYPLKFELNDDGLYEANTTIYPKVSDLNYSQLAINLGKDIENVTPYIIGSNNQKLPMKKIVDPVLEKIWWVETGEWNDEFKAWVTNTRRTAGNIEFQVGTQRLSLHIGFSEASKEDLEKYLTDFKSDMWELILDDNSYIQAEAKEGQVGSVDESTLRFINNILKCGKKLLQQPKSELREVQTLKPRKAVKPVPRTFMEISTRGNCKTLTSRDSESNYNVAENRYALYVLMATYRIVSQLVQVSKSKSERFNNSLLKLEERLASLKDYKEINRELVVKDYKSSLKLVDLKSINQDLNKKVAEIRSGEFCNSQVGYLKLDKLTTNKDAIFCSVKFNINDQWHTIDSARSMVLDIDNAYGGLFSQYSECKISAYI…	Aliivibrio fischeri	Gammaproteobacteria
Gammaproteobacteria	Escherichia coli	WOFC01000039.1	GIV13_20410	gb|MUM99632.1|	MALEQVIYNLEEVKGLSDEELYQRLYDSWGLENHKIDVWGELSINVAGNWAGIRNAKTLSGNQSIEYPLADSHELQSGVFLTPSVAKIVLGNDTKGMVACELMLASIPQRAKKNNPFLLAVNDKTVERLTYLPDALPNLDRQALIQNEDETLLRKVIYDAEVKRVKHKIASETEALEAALQEKQQDMTDKLAELSDAFKSTQDKITASTTELESSIKRNEELNNDNHRLNLKIQESKAELDVIIEKSRKVEESMARKVEKLTDFIKEKAIFLKSFEFLDEEDFDFFVGSPLSNKERGEHISFSQALYSNYSDAVSYIQAYLKERGILYPRHIIENFLTLIRTNDLIILAGDSGSGKTNLVQSFAKAIGGVSKIIPVKPNWTSSEDLLGYYNPLEKKYLA…	GIV13_20405	gb|MUM99631.1|	METPFVIKFIETKWHDKQTLVSVSESEYSLKLEQTGNNAFSAHTTIYPKVDELRFAQLAIKTKQGDQSPPYIVMPNGDRKQLESITDPASNAVWWVEPAHWDAKQRVWRSEARRTAGQITFVIGNSTLKLDIDISEQTKSDLSRYLSDFKADLWELILDENSHITGDAKNSQVAAIDQEALSLVASILSNAQTILKKPKVELKEIQALKPAKEVRPVPRTFMEICTKGSRKHLTSRASEPSYNVPENQYVLYVVLSTLSIVKQLVKVAESKKSRFSGAIEKLNERLDSLKDYRIINRDLVVKDLERLKKRFDTEVINAELASQLGEINANKYFSQNHAAKGYLRLEKTTGSENEWWAKIKPSQHDDWQQFELDGYTIFSSGEYYASLFQPYSDYDMVAI…	Escherichia coli	Gammaproteobacteria
Gammaproteobacteria	Alteromonas hispanica	JAAAWP010000001.1	GTW09_02425	gb|NDW20383.1|	MEIRDYEEFELEPLTDAELVSILQKRWELNDTEFNVWGELKPLGDVSWGYLTNVRVIGGSTILTYPLKGHNGNCEFFVNPKDASKYGHKDNSRLIRCQLILSPQEERKKHEIPFEMNVKPGSCSELKELPSAAPIEIINADDKSPYITSSLYDFHLNKIQEKLALATDELKTATENELNLLQAQRDEEESKRDSAITLNRTLSEKEQQLKDSIQLIETEKHASTDALLKLQNQLATFEVEMNQKIKRLKSYVSDKAQFLKTFEFIDEDDLENFLLESNAIGSQVDGLSFKDDFGKDYERAVSYIQAHLVENDILYPRHIIENYLTLLRTKDLIILAGDSGSGKTNLVKSFAKAVGGKSVIVPVKPNWTSREDLLGYYNPLEKKYLSTEFLDALLEARQN…	GTW09_02430	gb|NDW20384.1|	MTFNEESQDYECETTIYPNADGFLGQLAIRVLDDNATPPHINMPSGEVKYLEEIKDKDTGRLWWIEKDTWDEKNTYWRHSGVNTAGMLNLSIAGQRCHVNIGSMDFSFEQLNNYLDSFKNDLWELILDESSSIQTNKMDSAFGINKDAIDCIKQLVGHAQKILESPKGELREVQELRPRKAVRPVNRTFMELVSKPNQRFLTSRASTPTYNVPENRYVLFALKRCYRIIKQIRTLSENKSKRYLNTVSKLQGQLSSFRPTVTINRDLVVADLERLKVRCNIKYWQAKLAERLALNNINLYKKTNLHSVLRIKTEKVSTNNLSGEKDGFFIKVVDNKDWSQPNDNFTFLKFLRGNYDLTSCLEPYSEYELVGKFTCSQSARANFYNIIELAEIRIISTPG…	Alteromonas hispanica	Gammaproteobacteria
Alphaproteobacteria	Rhizobium leguminosarum	WXXN01000025.1	GUK34_28350	gb|NEI08714.1|	MRPLADLPAEWQVAVSGSESARRISALARREIEDHVRKVVLQEDEELARRHVDNVETLSKLDADRRQAQDDARAARAKIEADLAKHRRRRDEAERSAADLQVQLGIEQERFAAYKSTVEQEKQLMEINYRRLTDLFTEKGNRLVALGLADAEDVAAIMPEMTGPADERSGVGFIDALAGDYALLAPLLQSRLAEAGLLYSQAQLRDFLALLRTRDLIVLAGDSGSGKTSLVRAAAAAIGGVCTVIPVKPNWTGPEDLLGYYNPIERSYQATPFLLALQAAARSPHVPHFICLDEMNLARVEHYFADFLSLLESRSTAPEIHLYTADEERHVVVEQGIFLAVDAEARRRTGLPDTATLEEILRHDQANAELHRLAGLADNESVLVHHTRLRRSLAAQLRM…	GUK34_28345	gb|NEI08713.1|	MGVLAHYLDIEWQAPGLTRRVEVSTYPIEIEIAPDGTLHAEVSIFRDFAPWVGLQLSGALAGVEPCTINAENERLPWLQVSDGNDRMWWIPETGWSKAGNKHVSEMHRSFGSFSVELGSRQKLLLDAVALELDRAHAQEYLDDFRDELVWLAIGRPTGAMAEVGSDNSRDLLDALKGFTDAASRVLEHPAREIREVTGVVATARVRPNSETFRAVMRRPGARSYPGRTAQESADIPENRYVRGLVEHCRRLARSLARSSGHHQAHLAARAAREKSRAADLLAVERVEVDPVIFDNQLSDIRKRLDAIATWSGSSIAPGPGERLYRFTVGKEFKVDRGAAREFFYRNPDRDDHYDEREGINFSVARLPDDLHDLVIAASRFDKDICLDLTGNAVITTFRT…	Rhizobium leguminosarum	Alphaproteobacteria
Gammaproteobacteria	Vibrio vulnificus	JAAQVU010000001.1	HBN04_10390	gb|NIG90719.1|	MALEQVIYDLKEVKGLSDEELYQRLYDSWGLENHKIDVWGELSINEAGNWAGIRNAKTLHDNQSIEYPLADSYELQSGVFLNPSVAKIVLGNDTKGMVACELMLASIPQRAKKNNPFLLAVNDKTVERLTYLPDALPNLDRQALIQNEDETLLRKVIYDAEVKRVKHKIASETEALETTLLEKQQEMTDKLAELSDAFKSTQDKITASTTELESSIKKNEELNNDNHRLNLKIQESKAELDVIFEKSRRAEEYMARKVEKLTDFIKEKAIFLKNFEFLDEEDFDFFVGSSLSNKDRGEHISFSQAFDSNYSDAVSYIQAHLKERDILYPRHIIENFLTLIRTNDLIILAGDSGSGKTNLVQSFAKAIGGVSKIIPVKPNWTSSEDLLGYYNPLEKKYLA…	HBN04_10385	gb|NIG90718.1|	MEAPFVIKFIETKWHDKQTLVSVSESEYSLKLEQMGNNAFSAHTTIYPKVDELRFAQLAIKTKYGNQSPPYIAMPNGDRKQLESITDPASNAVWWVDPAHWDAKQRVWRSEARRTAGQITFVIGNSTLKLDIDISEQTKSDLSRYLSDFKADLWELILDENSHIMGDAKNSQVAAIDQEALSLVASILSNAQTILKKPKVELKEIQALKPAKEVRPVPRTFMEICTKGSRKHLTSRASEPSYNVPENQYVLYVVSSTLSIVKQLVRVAESKTNRFSGAVEKLNERLSELKGYKKVNRDLLVKDLERLKRLYDVDYINEELSKSLALINTTNKIPSLQTNNGYIRLEGTTKERDGWFIQLKYSADGTWQALEDGKFTILKPSLPYFRLFQKESEYEIRAN…	Vibrio vulnificus	Gammaproteobacteria
Alphaproteobacteria	Rhizobium leguminosarum bv. viciae	WIEB01000077.1	GFM44_33425	gb|NKK60731.1|	MRPLADLPAEWQVAVSGSEAVRRISALARHEIENHVRKVVLEENEELARRHADNIETLSRLDADRRQAHDDARAAGAKIEADLAKHRQRRDEAERSAADLQVQLGIEQERFAAYKSSAEQEKQLMEINYRRLTDLLTQKGNRLVALGLADAEDVSALIPEITGRGDERSGVGFTDALAGDYARLAPLLQSRLAEVGLLYSLAQLRDFLALLRTRDLIVLAGDSGSGKTSLVRAAAAAIGGVCTVIPVKPNWTGPEDLLGYYNPIERSYQATPFLLALQAAVRSPQVPHFICLDEMNLARVEYYFADFLSLLESRSTSPEIHLYTADEERHVVVEQGIFLAVDAEVRRRTGLPDTATLEDILRHDQANAELHRLGGLADNESVLVHHARLRRSLAAQMRM…	GFM44_33430	gb|NKK60732.1|	MDVLAHYLEIEWQAPGVARRVEVSTYPIEIEISPDGRLSAEISIFRDFAPWVGLQLAGALAGVEPCTINAENERLPWLQVSDGKDRTWWIPETGWSKAGNKHVSEMHRSFGSFSVELGPRQKLVLDAVALELDRAHAQEYLDDFTDELVWLAIGRPSGALGEVGSDNSRDLLDALKGFTDAASRVLEHPAREIREVTGVVATARVRPNSETFRAVMRRPGARSYPGRTAQESADIPENRYLRGLVEHCRRLARSLTRSSAHHQAHLAARATREKSRAANLLAVERVEVDPEIFDNQLSDMRKRLDAIATWAGSSVAPEPGERQYRFTVGKEFKGDGGAAKEFFYRNPDRDDRYDEREGINFSVARLPEDLHDLVIAASRFDKDIRLDLMGNAVITTFRT…	Rhizobium leguminosarum bv. viciae	Alphaproteobacteria
Alphaproteobacteria	Rhizobium leguminosarum bv. viciae	WIDV01000017.1	GFL92_25920	gb|NKL30183.1|	MRPLADLPAEWQVAVSGSESARRISALARREIEDHVRKVVLQEDEELARRHVDNVETLSKLDADRRQAQDDARAARAKIEADLAKHRRRRDEAERSAADLQVQLGIEQERFAAYKSTVEQEKQLMEINYRRLTDLFTEKGNRLVALGLADAEDVAAIMPEMTGPADERSGVGFIDALAGDYALLAPLLQSRLAEAGLLYSQAQLRDFLALLRTRDLIVLAGDSGSGKTSLVRAAAAAIGGVCTVIPVKPNWTGPEDLLGYYNPIERSYQATPFLLALQAAARSPHVPHFICLDEMNLARVEHYFADFLSLLESRSTAPEIHLYTADEERHVVVEQGIFLAVDAEARRRTGLPDTATLEEILRHDQANAELHRLAGLADNESVLVHHTRLRRSLAAQLRM…	GFL92_25915	gb|NKL30182.1|	MGVLAHYLDIEWQAPGLTRRVEVSTYPIEIEIAPDGTLHAEVSIFRDFAPWVGLQLSGALAGVEPCTINAENERLPWLQVSDGNDRMWWIPETGWSKAGNKHVSEMHRSFGSFSVELGSRQKLLLDAVALELDRAHAQEYLDDFRDELVWLAIGRPTGAMAEVGSDNSRDLLDALKGFTDAASRVLEHPAREIREVTGVVATARVRPNSETFRAVMRRPGARSYPGRTAQESADIPENRYVRGLVEHCRRLARSLARSSGHHQAHLAARAAREKSRAADLLAVERVEVDPVIFDNQLSDIRKRLDAIATWSGSSIAPGPGERLYRFTVGKEFKVDRGAAREFFYRNPDRDDHYDEREGINFSVARLPDDLHDLVIAASRFDKDICLDLTGNAVITTFRT…	Rhizobium leguminosarum bv. viciae	Alphaproteobacteria
Bacillota	Dorea formicigenerans	JABAFX010000037.1	HF855_12100	gb|NME58126.1|	MKISEFFEYNNQQVLEENENILEYLEQIFGKSTEIDREGKKEFTFGKVIGLVTDSFLDEKTKRQKVSMLLCDADSKLLLWNGRPVEILRTNPENRLEEKKSYIQGLFFSGSELFTRNPQPCEEVPGANMVTSFVSDLDEEIRTAEETDENILSLKNKLEDQGYHCNIKVLAQFLLGLNTNQLIILHGAPGMGKTSFVSNIARALGFAYKIIPVRPNWIDNQDLTGYFNPVERRYYSTPFLDALCEAKENPQKHYLICLDEMNLAHVEYYFSDVLSSMESGEGIPLYAHKDQENAWKRQEAIMASHNENTVEWLDAKTDQENLKNRYTPEFEIPQNVTFVGTLNMDATTNDLSPKVIDRSCIIKVTKDAGETLCPFEQGVMTLEEMQGEDSFEKQLLKAL…	HF855_12095	gb|NME58125.1|	MNNKTCERVHPVRICKDNPDAEPFYEGMDEPLREIHDIWIMQYLRVDGAYFPRIAFEANEDENIEFDSNQEYEILSRKTDGYIYFIPENFNIYTVGDAQFFYRKNGKKQKIRIHVASMLDGETYEKILKELTAISIRFLFMTMNDGKNRRIKREYLTEYELEIHQLEHTIKEMSETLKALDREPVTDMINRPARQNFRQVKHLDANVIMDHYVLKKPKVRTRVHEKTFHIYENQKVYNFVKLLEKRLWELEQELEDKKMQMNRAAQGENRSKYDDVEENSGVAGTKKSIDELCSTITNLKGKLQAVYQLPMFKNEKYKEQKVYPLRTSNLFVNHKRYKKLFHQMRTYREMGELVEETVQYSSYHKSSEIYEIWCYFKILEIFILEKGYVIDRISWPGKK…	Dorea formicigenerans	Bacillota
Gammaproteobacteria	Pseudomonas sp. WS 5027	JAAQWU010000010.1	HBO09_14240	gb|NMY46560.1|	MVHEIVSETVKYAPDELIGKSDAELLSLLKKSWGYAADQPLTVIGKFTAGEGGQRPYFLTLLRSTNDSSRLEYPVDVYPISHRVYISPRDGSFLLERNEGAVYYTARVQLSPEIERERQRNRLTLQTVSGSLEALEELPFELGSKVMEEGKVFLEKSIVDFYRHKHRTQLEADFTLLKSELEQEQAHLDESVAQLKSDEKQISEQLDKKTRSLQQTQEQVQVQHQRLSVLTENYQTRKAVMDSQLARLNDFVRDKADTLLRLGFLDERDMQALLGEAQQHDATECHDFELVFGLDADAAIAHIQAFLHARGIYYRQALLKDFLALLRTQDLIVLAGDSGSGKTYLVKSFAQAIGGKAIVIPVKPNWTSTEDLLGYYNPLEKRYITTQFLDALIEAANNP…	HBO09_14235	gb|NMY46559.1|	MGRQLLGPVMQPNLEFRNLDISWADAETLLKLESSSDALDAVESCGVYRVETTTFRRYQPWLGLRINEPLVHPPYCMLGSGGQIPLLPVKDPATRQIWWIHSTGWDEKNTRHLSEMYRTAGTVELVVQNRRYDLVVHTANFNVDELEYYLRDFKNELWMLILNEQSAIKGRTEQEVPNLYSDELVDRLKDFVEALEHIAKTPGVELKEIQALMPARSVRPINRTFMELATKGQSRFLTGRTFQESLNTPDNQHLHYCLSRVNYLVSRFREIGSARIRAFELAMASDLSRLQELAQTEFRVVDQTVFDNEIREIERELRRNENVFQDALSGQKECSVAGLRKGGCNIVLGKLFRNAETEFFCNQVNGRDYKKEISDGKYLTVKLPGSFASFAQKFQQSKF…	Pseudomonas sp. WS 5027	Gammaproteobacteria
Gammaproteobacteria	Pseudomonas lundensis	JAAQYG010000016.1	HBN72_14685	gb|NNA03325.1|	MHNATSGVSSDQESPSLAWSEADLLKFLAQAWDQYTPAHIKVIGRLRLAEGDSFGFLEGLHHAETGIKLGSPSSNSRVHQRVFVPGSEIKDFQSRWGSATYAVAELELSPLEERQKQDDPFTCKVRRGTLAALSHIPESWGVRSIDSESVPLIAEMARQAIDERLAGETAEVEERLRSMRSTLEEMTSDKRLFDDELGRVEREVLQRMDRIELLDAEYMKKREVLDKKNSELEALLRERGERMVALDLVDRADLEKVFPPKGTPDVREGHLFREALAGNLQQLASFIQAHLWRKGIRYTRAHLLDFITLLRSNDLIVLAGDSGSGKTSLVKAVASSVGGRCTIVPVKPNWTGSDDLLGYYNPIERRYHPSQFLMALLDAAREPEIPYFICLDEMNLARV…	HBN72_14680	gb|NNA03324.1|	MLPEIEARYLMIDWRSEGVARAIEVAPVPLEIESLAEGGFIVECTIFNDFHPWLGIRLGSGFEEVVPVSVTASGQEAPMLRVADQLGGGCWWLHHDGWDHFGKRHLSELQRSAGVYNFRIGDVMLQVENHLSAFGCADIQAYVDDFRGDLLWMIMNDTAGATAAGKGAGTGAELIEALEKLHVASQRVLASPSVTIREGRAPQPVAKLRPNTVSFREYARNPEARQLTGRVFNESADTAENRYLRHMLAVSLKVVDAYISAASLQSDFLDRLALQESERARRNREMKMRLVDPEVFDQQTEEIKRKLDALADFKDLSGDEAGRVGRFPIRLGNRYFFEFSFYYTPQETLESNVASPVDYRVVVLPKDLFELILGAHHFCKDFTLTGCVESCVKLTSKGQ…	Pseudomonas lundensis	Gammaproteobacteria
Bacillota	Clostridium saccharobutylicum	JABFUS010000001.1	DFH84_002206	gb|NOW10317.1|	MRKLEYFGFKGFKDNEEQESLLKDNLLDSTFNELFDYIKNYLKYNKKLIYSDDTIRRFLVALQSNELVILSGPSGTGKSSIVTAVAEAIGGVAKIIPVKPSWTESEDLIGFYNPIEKSYVSTPFLDALVEAKKNENKDKLYLICLDEMNLSHVEYYFAEFLSKLEVNKENPSIELYSKEILDEVCESIEDTIQLMSGESVEISIDSIKKWCADNSKEYTELIIELKKKIRFIEKYPAIFDIPNNVRFVGTMNIDQTTKLISPKVIDRSFIIELLKFRAKVDDIKGEKVESKFIPADILKLNNKEELSKQSKEIIKELDLTNQVLELLDCDYNSRTYSHISKYLCNLEQWEIKFDKNEVLSDLIAMKILPRMNISIKNKADEKYKKWIEFKTEGYKKYSD…	DFH84_002205	gb|NOW10316.1|	MEIKLVLLDINNGKFEIYKEINEYCENNLCITQYEKNKRNNNFLHLGVKLIDVYNPKDYIVSIGNENYNNLKFNNDVECFYQETIGEDADQIGISKAGFFKVEIRNSERKIVYTSEQILVKPSIISVEMYKQMVDMLLNINKDLVMQDFSNIYLNIEGKKEDLSETVLNFLNNIENLIYNINKNPYVELVKEDAKVSYKKIKKISSKVIIEKELYPFKNKFMSEVARESKDTYENRMICSALLDIKNLIETNLNMNLNYINKINKDIKITTAQINSMCNTPIATQKMSASNAEERAILNLGRNNSSDRLPLPMRPHGNLEYFNDLERKLERLNNTIKLLKDCKANWTSSNNKIDAYLKLEIFKELKMTQKRREKWRTTQVFLHDLTYGKLYRKLKNFCE…	Clostridium saccharobutylicum	Bacillota
Bacillota	Dorea formicigenerans	JAAIMA010000003.1	G4297_01890	gb|NSC60946.1|	MKISEFFEYNNQQVLEENENILEYLEQIFGKSTEIDREGKKEFTFGKVIGLVTDSFLDEKTKRQKVSMLLCDADSKLLLWNGRPVEILRTNPENRLEEKKSYIQGLFFSGSELFTRNPQPCEEVPGANMVTSFDSDLDEEIRTAEETDENILSLKNKLEDQGYHCNIKVLAQFLLGLNTNQLIILHGAPGMGKTSFVSNIARALGFAYKIIPVRPNWIDNQDLTGYFNPVERRYYSTPFLDALCEAKENPQKHYLICLDEMNLAHVEYYFSDVLSSMESGEGIPLYAHKDQENAWKRQEAIMASHNENTVEWLDAKTDQENLKNRYTPEFEIPQNVTFVGTLNMDATTNDLSPKVIDRSCIIKVTKDAGETLCPFEQGVMTLEEMQGEDSFEKQLLKAL…	G4297_01895	gb|NSC60947.1|	MNNKTCERVHPVRICKDNPDAEPFYEGMDEPLREIHDIWIMQYLRVDGAYFPRIAFEANEDENIEFDSNQEYEILSRKTDGYIYFIPENFNIYTVGDAQFFYRKNGKKQKIRIHVASMLDGETYEKILKELTAISIRFLFMTMNDGKNRRIKREYLTEYELEIHQLEHTIKEMSETLKALDREPVTDMINRPARQNFRQVKHLDANVIMDHYVLKKPKVRTRVHEKTFHIYENQKVYNFVKLLEKRLWALEQELEDKKMQMNRAAQGENRSKYDDVEENSGVAGTKKSIDELCSTITNLKGKLQAVYQLPMFKNEKYKEQKVYPLRTSNLFVNHKRYKKLFHQMRTYREMGELVEETVQYSSYHKSSEIYEIWCYFKILEIFILEKGYVIDRISWPGKK…	Dorea formicigenerans	Bacillota
Bacillota	Dorea formicigenerans	JAAIOF010000020.1	G4395_12175	gb|NSE61608.1|	MKISEFFEYNNQQVLEENENILEYLEQIFGKSTEIDREGKKEFTFGKVIGLVTDSFLDEKTKRQKVSMLLCDADSKLLLWNGRPVEILRTNPENRLEEKKSYIQGLFFSGSELFTRNPQPCEEVPGANMVTSFVSDLDEEIRTAEETDENILSLKNKLEDQGYHCNIKVLAQFLLGLNTNQLIILHGAPGMGKTSFVSNIARALGFAYKIIPVRPNWIDNQDLTGYFNPVERRYYSTPFLDALCEAKENPQKHYLICLDEMNLAHVEYYFSDVLSSMESGEGIPLYAHKDQENAWKRQEAIMASHNENTVEWLDAKTDQENLKNRYTPEFEIPQNVTFVGTLNMDATTNDLSPKVIDRSCIIKVTKDAGETLCSFEQGVMTLEEMQGEDSFEKQLLKAL…	G4395_12170	gb|NSE61607.1|	MRESTSCKDNPDAEPFYEGMDEPLREIHDIWIMQYLRVDGAYFPRIAFEANEDENIEFDSNQEYEILSRKTDGYTYFIPGNFNIYTVGDAQFFYRKNGKKQKIRIHVASMLDGETYEKILKELTAISIRFLYMTMNDGKNRRIKREYLTEYELEIHQLEHTIKEMSETLKALDREPVTDMISRPARQNFRQVKHLDANVIMDHYVLKKPKVRTRVHEKTFHIYENQKVYNFVKLLEKRLWALEQELEDKKMQMNRAAQEENRSKYDDVEENSGVAGTKKSIDELCSTITNLKGKLQAVYQLPMFKNEKYKEQKVYPLRTSNLFVNHKRYKKLFHQMRTYREMGELVEETVQYSSYHKSSEIYEIWCYFKILEIFILEKGYVIDRISWPGKKEKPFVFES…	Dorea formicigenerans	Bacillota
Bacillota	Dorea formicigenerans	JAAIOG010000017.1	G4398_10510	gb|NSE87431.1|	MKISEFFEYNNQQVLEENENILEYLEQIFGKSTEIDREGKKEFTFGKVIGLVTDSFLDEKTKRQKVSMLLCDADSKLLLWNGRPVEILRTNPENRLEEKKSYIQGLFFSGSELFTRNPQPCEEVPGANMVTSFVSDLDEEIRTAEETDENILSLKNKLEDQGYHCNIKVLAQFLLGLNTNQLIILHGAPGMGKTSFVSNIARALGFAYKIIPVRPNWIDNQDLTGYFNPVERRYYSTPFLDALCEAKENPQKHYLICLDEMNLAHVEYYFSDVLSSMESGEGIPLYAHKDQENAWKRQEAIMASHNENTVEWLDAKTDQENLKNRYTPEFEIPQNVTFVGTLNMDATTNDLSPKVIDRSCIIKVTKDAGETLCSFEQGVMTLEEMQGEDSFEKQLLKAL…	G4398_10515	gb|NSE87432.1|	MRESTSCKDNPDAEPFYEGMDEPLREIHDIWIMQYLRVDGAYFPRIAFEANEDENIEFDSNQEYEILSRKTDGYTYFIPGNFNIYTVGDAQFFYRKNGKKQKIRIHVASMLDGETYEKILKELTAISIRFLYMTMNDGKNRRIKREYLTEYELEIHQLEHTIKEMSETLKALDREPVTDMISRPARQNFRQVKHLDANVIMDHYVLKKPKVRTRVHEKTFHIYENQKVYNFVKLLEKRLWALEQELEDKKMQMNRAAQEENRSKYDDVEENSGVAGTKKSIDELCSTITNLKGKLQAVYQLPMFKNEKYKEQKVYPLRTSNLFVNHKRYKKLFHQMRTYREMGELVEETVQYSSYHKSSEIYEIWCYFKILEIFILEKGYVIDRISWPGKKEKPFVFES…	Dorea formicigenerans	Bacillota
Gammaproteobacteria	Escherichia coli	JABUXJ010000114.1	HUC46_19790	gb|NUC02142.1|	MALEQVIYNLEEVKGFSDEELYQRLCESWGITNGKLAVWGKILNGPDSDSRKLPTRLLEIKSLQTGLDTEYPINVRLTMDKGVFVSFKSVEELFGLEDGSFVSCELALAPQSEREKHENPFECNVVVSSVRRLIKLPEYTANDIIKGDENIFLDEAVYKQHLQNVQSRIDSEVTALNAEFEREESSLKAQISSYKDQLQHVQDDLNQKNNVLSQAIAKAQKLEVEHSEWQHKIALQKKAEETMSKKIERLKAYVESKAGFLKSFEFLDDDDFDLFVGSTLSNKDRDEHISFSQAFDSNYSDAVSYIQAHLKERDILYPRHIIENFLTLIRTHDLIILAGDSGSGKTNLVQSFAKAIGGVSKIIPVKPNWTSSEDLLGYYNPLEKKYLVTPFLEALIEAK…	HUC46_19795	gb|NUC02143.1|	MEAPFVIKFIETKWHDKQTLVSVSESEYSLKLEQTGNNAFSAHTTIYPKVDELRFAQLAIKTKQGDQSPPYIVMPNGDRKQLESITDPASNAVWWVEPAHWDAKQRVWRSEARRTAGQITFVIGNSTLKLDIDISEQTKSDLSRYLSDFKADLWELILDENSHITGDAKNSQVAAIGQEALSLVASILSNAQTILKKPKVELKEIQALKPAKEVRPVPRTFMEICTKGSRKHLTSRASEPSYNVPENQYVLYVVSSTLSIVKQLVKVAESKKSRFSGAIEKLNERLDSLKDYRIINRDLVVKDLERLKKRFDTEVINAELSEQLAKINVNLSRSYSEKGYLRLEKATGSENEWWAKIKLSQNDDWQQFEPDGYTIFNSRDHYASLFKAYSDYEIEAKIP…	Escherichia coli	Gammaproteobacteria
Gammaproteobacteria	Escherichia coli	JABUWT010000144.1	HUC27_22540	gb|NUD39165.1|	MALEQVIYNLEEVKGFSDEELYQRLCESWGITNGKLAVWGKILNGPDSDSRKLPTRLLEIKSLQTGLDTEYPINVRLTMDKGVFVSFKSVEELFGLEDGSFVSCELALAPQSEREKHENPFECNVVVSSVRRLIKLPEYTANDIIKGDENIFLDEAVYKQHLQNVQSRIDSEVTALNAEFEREESSLKAQISSYKDQLQHVQDDLNQKNNVLSQAIAKAQKLEVEHSEWQHKIALQKKAEETMSKKIERLKAYVESKAGFLKSFEFLDDDDFDLFVGSTLSNKDRDEHISFSQAFDSNYSDAVSYIQAHLKERDILYPRHIIENFLTLIRTHDLIILAGDSGSGKTNLVQSFAKAIGGVSKIIPVKPNWTSSEDLLGYYNPLEKKYLVTPFLEALIEAK…	HUC27_22535	gb|NUD39164.1|	MEAPFVIKFIETKWHDKQTLVSVSESEYSLKLEQTGNNAFSAHTTIYPKVDELRFAQLAIKTKQGDQSPPYIVMPNGDRKQLESITDPASNAVWWVEPAHWDAKQRVWRSEARRTAGQITFVIGNSTLKLDIDISEQTKSDLSRYLSDFKADLWELILDENSHITGDAKNSQVAAIGQEALSLVASILSNAQTILKKPKVELKEIQALKPAKEVRPVPRTFMEICTKGSRKHLTSRASEPSYNVPENQYVLYVVSSTLSIVKQLVKVAESKKSRFSGAIEKLNERLDSLKDYRIINRDLVVKDLERLKKRFDTEVINAELSEQLAKINVNLSRSYSEKGYLRLEKATGSENEWWAKIKLSQNDDWQQFEPDGYTIFSSRDHYASLFKAYSDYEIEAKIP…	Escherichia coli	Gammaproteobacteria
Gammaproteobacteria	Escherichia coli	JABUVZ010000122.1	HUC05_22620	gb|NUE12611.1|	MALEQVIYNLEEVKGFSDEELYQRLCESWGITNGKLAVWGKILNGPDSDSRKLPTRLLEIKSLQTGLDTEYPINVRLTMDKGVFVSFKSVEELFGLEDGSFVSCELALAPQSEREKHENPFECNVVVSSVRRLIKLPEYTANDIIKGDENIFLDEAVYKQHLQNVQSRIDSEVTALNAEFEREESSLKAQISSYKDQLQHVQDDLNQKNNVLSQAIAKAQKLEVEHSEWQHKIALQKKAEETMSKKIERLKAYVESKAGFLKSFEFLDDDDFDLFVGSTLSNKDRDEHISFSQAFDSNYSDAVSYIQAHLKERDILYPRHIIENFLTLIRTHDLIILAGDSGSGKTNLVQSFAKAIGGVSKIIPVKPNWTSSEDLLGYYNPLEKKYLVTPFLEALIEAK…	HUC05_22615	gb|NUE12610.1|	MEAPFVIKFIETKWHDKQTLVSVSESEYSLKLEQTGNNAFSAHTTIYPKVDELRFAQLAIKTKQGDQSPPYIVMPNGDRKQLESITDPASNAVWWVEPAHWDAKQRVWRSEARRTAGQITFVIGNSTLKLDIDISEQTKSDLSRYLSDFKADLWELILDENSHITGDAKNSQVAAIGQEALSLVASILSNAQTILKKPKVELKEIQALKPAKEVRPVPRTFMEICTKGSRKHLTSRASEPSYNVPENQYVLYVVSSTLSIVKQLVKVAESKKSRFSGAIEKLNERLDSLKDYRIINRDLVVKDLERLKKRFDTEVINAELSEQLAKINVNLSRSYSEKGYLRLEKATGSENEWWAKIKLSQNDDWQQFEPDGYTIFNSRDHYASLFKAYSDYEIEAKIP…	Escherichia coli	Gammaproteobacteria
Thermotogae	Marinitoga sp. 1138	LBFA01000016.1	XO11_05815	gb|NUU97782.1|	MFEEIVEYEDYKNWAKKDKINFLNEKFGTNNSILKGTIQLASSEKYFLITNLRNIENDVIINPFNNEILRNTICLCENVDSFLLKRNLKIGDEVIFKFTIPFSQHEDKNKLIIAKSKTVYKVANIMEILDNIDNNVKEKEIFSAVNLVEFLEQIGEKDFGNKINSIINERILLVNKNIDNYLEKIKNKIYTQEERLKELENIVVEKEFEIKELEILRNKYIELGILNEDNVNEKKEEIIKEEYIDIEDKKEQIDYIQKYLALNKGLYYDDHILKRFFLALHTNQIIILSGEPGTGKTSLVRGFSEAISAKHKIISVQPNWTDNQDLLGFYNPIENVYVPTPFLDAIIEAKENQDRLYILCLDEMNLSHVEYYFSEFLSKIQSDKILDLYSKKIYDENLK…	XO11_05810	gb|NUU97730.1|	MKLISFMMNVDKNLKRIEFLDKGNYKKGTILGEDNKEFWVTYTHYRVNNKRYRLGFSIVDLSDKDYEVYILDSEKEPINKLTSISGKGIKIFYDSNDNNDPDVGSNASGVFYVGVFENGERIYVSPPIYVLPSSLSYNDYLEMINDLIQINEHLIEDNKSKVFLAGKGIQNLVEIGKTLDDMKKVLEKINVNPAASLKAIPAKIKYDPKKAISPKILVEKKMYPFKNKFKGQMKVESVDIYENKIIKYLLNLLKKKIELYIQSLNNYKEQKKREIEIIREQNKQEIDFDSELEKLEKILIDNKKNILNIIKNNKNLENIDKDKDIKISFDIYKKASIPKSRINGKIEDNKIILDCDFITTRENRFISLERGFYFYAFSPFENFQFSKFNAETFKLKIEI…	Marinitoga sp. 1138	Thermotogae
Gammaproteobacteria	Pseudomonas reactans	JACAQO010000002.1	HX796_01165	gb|NWC84578.1|	MQQDGVSAASGEGYAEELPSLGWSEEDLRYYLAQVWGQRDPLHLRVIGRLQLAEGKTFGFLVDLHHAETGIRLPPPLKNASVRQSVFVPPSELSRIQKLGRIESFASAELDLSPLDERKKRGDPFGCMVHPETLEPLSHIPESWWSIKNIQSEAMPLVVTKVREAIEDRLQRETSEAGDKLLSAQLALEVAAQNKKLLDDEYGRIGLEVDQRMDRIAALDTEFVQRKNTLETRFRELEAFLQDRSERMVALNLIDRADLEKVFPLIGARDTREGHRFREALAGNLQRLASYIQAFLWRKGILYTRAQLLDFITLLRTNDLIVLAGDSGSGKTNLVKSVASAVGGRCTIVPVKPNWTGSDDLLGYYNPIERRYHPTQFLLALLDAAREPEIPHFICLDEM…	HX796_01160	gb|NWC84577.1|	MPPEIEARYLTIDWQSEGVARAIEVAPVSLEIESRTDGEFVVESVIFNDFQPWLGIRVGPGFEEVMPVFVTALGQETPMLQVADPRGGGFWWLRNDGWDHAGKRHLSELQRSAGVYNIRIGDLTLRVENRLSTFGRADIQAYIDDFRGDLLWMIMNDSAGATATGKGAGAGTEFADALKELHTASHRVLASPAVNIREGQAQQPLAKLRPNTVTFREYARNPTARQLTGRVFNESADTAENRYLRHVLAVSLKVADAYVSAASLQSSFLDRLASQESERARRDREMEMRPVEPEVFDQQTEEIKRKLDALADFKSRSGHEADLVGRFPIRLGKRYFDHFAFYYTPQDTMASNVASPVDYRVVVLPKDLFELILGAHHFCKNFTLTGSVDSRVRDTSKGQ…	Pseudomonas reactans	Gammaproteobacteria
Bacillota	Clostridium saccharobutylicum	JACAZP010000002.1	B0H42_003490	gb|NYC30859.1|	MRKLEYFGFKGFKDNEEQESLLKDNLLDSTFNELFDYIKNYLKYNKKLIYSDDTIRRFLVALQSNELVILSGPSGTGKSSIVTAVAEAIGGVAKIIPVKPSWTESEDLIGFYNPIEKSYVSTPFLDALVEAKKNENKDKLYLICLDEMNLSHVEYYFAEFLSKLEVNKENPSIELYSKEILDEVCESIEDTIQLMSGESVEISIDSIKKWCADNSKEYTELIIELKKKIRFIEKYPAIFDIPNNVRFVGTMNIDQTTKLISPKVIDRSFIIELLKFRAKVDDIKGEKVESKFIPADILKLNNKEELSKQSKEIIKELDLTNQVLELLDCDYNSRTYSHISKYLCNLEQWEIKFDKNEVLSDLIAMKILPRMNISIKNKADEKYKKWIEFKTEGYKKYSD…	B0H42_003491	gb|NYC30860.1|	MEIKLVLLDINNGKFEIYKEINEYCENNLCITQYEKNKRNNNFLHLGVKLIDVYNPKDYIVSIGNENYNNLKFNNDVECFYQETIGEDADQIGISKAGFFKVEIRNSERKIVYTSEQILVKPSIISVEMYKQMVDMLLNINKDLVMQDFSNIYLNIEGKKEDLSETVLNFLNNIENLIYNINKNPYVELVKEDAKVSYKKLRRFLVK	Clostridium saccharobutylicum	Bacillota
Bacillota	Clostridium saccharobutylicum DSM 13864	AYXL01000182.1	M945_2033	gb|OAV40589.1|	MKNEKINLNQEEATILEAQVISTESGFNKENEIIISDELRNEEVNLNNNKDIMITEVNSDEIIKMSNENKIEYLEKNVFKSKFVLGRLNKIRDGKNGKYTFVDLVLPYDINTNYKINGTNWRAFCDFNYVPNDVKQTLNQGDLIYFRPELNSINPHDIIRVNGITVKKLTSYKEFLKKENIELKDVKIGGLVALEREEDIRVWATEEFYRNFGQLHDDLLANVEEEQKKIESIMKEKEKLYKSIQDERDKADKKKKDLEKELERNKKKADQEIKNKEDMLNKKKKEIENLVRKLEYFGFKGFKDNEEQESLLKDNLLDSTFNELFDYIKNYLKYNKKLIYSDDTIRRFLVALQSNELVILSGPSGTGKSSIVTAVAEAIGGVAKIIPVKPSWTESEDLI…	M945_2034	gb|OAV40590.1|	MEIKLVLLDINNGKFEIYKEINEYCENNLCITQYEKNKRNNNFLHLGVKLIDVYNPKDYIVSIGNENYNNLKFNNDVECFYQETIGEDADQIGISKAGFFKVEIRNSERKIVYTSEQILVKPSIISVEMYKQMVDMLLNINKDLVMQDFSNIYLNIEGKKEDLSETVLNFLNNIENLIYNINKNPYVELVKEDAKVSYKKIKKISSKVIIEKELYPFKNKFMSEVARESKDTYENRMICSALLDIKNLIETNLNMNLNYINKINKDIKITTAQINSMCNTPIATQKMSASNAEERAILNLGRNNSSDRLPLPMRPHGNLEYFNDLERKLERLNNTIKLLKDCKANWTSSNNKIDAYLKLEIFKELKMTQKRREKWRTTQVFLHDLTYGKLYRKLKNFCE…	Clostridium saccharobutylicum DSM 13864	Bacillota
Gammaproteobacteria	Vibrio cyclitrophicus ZF99	AIDL02000029.1	OAU_10955	gb|OED68632.1|	MDDNKLLYDKNYAKQLDDNDLYKCLYDAWKVQNEIIQVWGSLEGNAARTWFSLKQVKLIDTGEPIEYPLPNNNDLQAGVFLHPATAQALLNGKESALVKGELKLASVNNRKNKDNPFLVSLVPSSVEVVTELPKFSTDDIMQSDLTTLVSENVYRHFLSNLESKTAVDEEKAQAKLTRLDVTYSERQKILDTQFDEINSKVEGLNVKRDSLLDKLKDLEKLQYTVKANIEQEKSTLNLIIEKQQQIEDEMSKKIELLKQYVEEKASFLRDFEFIDEDVYAELSGIKPDSSEHSSGLNFVDDFGSDYSKLTSYLQAYLKEQGQYYSRHIVENYLTLIRTNDLVILAGDSGSGKTSLVQSFAQAVGGVAKIIPVKPNWTSSEDLLGYYNPLEKKYLATPFL…	OAU_10950	gb|OED68631.1|	MSNANFVIKYIETSWHDKFTLLELVESQYHLLLDEVSKEKFEAFTTIYPNVEGLKRSQIAISYTDRKTNRSPVIVLSGGTTVPLKKIEDPNTGKIWWVEPGEWNSHNKEWRNNTHRTAGAISFHIGKQNLKLHVTLSDASKDDLDKYLIDFKSGMWELILDESSYIHAEAKKGIAGSVDETTLKLVDSILRAGRHVLKKPKSELREIQTLKPRKAVKPVPRTFMEIATKGESRQLTSRGVKANFNVAENCYVLYVLMATQRIVSQLCRVSRSKTERLSNNLEKLQQRADSLKDYKEVKRDLVVKDYKVALESVNVEKINLDKAKYLEKLEQYSSSGAGSTGFLKVQKATNNNDGYFCKIKYDENGEWQNLGNSSSMILNLNDKYFPLFEPNSEYLLSAE…	Vibrio cyclitrophicus ZF99	Gammaproteobacteria
Bacillota	Geobacillus proteiniphilus	MQMG01000025.1	BRO54_2128	gb|OKO93065.1|	MESNARKLQDYLNSLLNELGAPINWTQEDAHQFYVRFCDPQLLGSRLILEVRYVKELQNDNVLLIAEVLNPDTFAPFVLPFNGDKWTVALTVPNNRNKYKKGDILTAVAEELKFNKLSDEKENRKLGMVFINANSIRRASFQTSLLARFGERIVQKLAEQLGPLEKIAPLIVSQIESQIENDILRLEAELNKQENELRANFREQEIKLQEEYRQKEEMFNKEKSKIDRQLKKLEGQKKLISDEESLLDKRKRELEEQKEALNKEAQKLEGYKKSLKSQFERFRLVHPLLGNEDDEENTISNDQTIHWSDQEDMIATIQGALHEQCDLQYERDVIECFVGTLKTNQLIILHGPSGTGKSSLARNFSKIIKGAKTYTIRVQSSWTDKQDILGFFNPIDYQY…	BRO54_2127	gb|OKO93064.1|	MELWIAEIKSTSERPIQKLISPLIFNGESNCYIASEYEGTIVVKTSNNKVQKVFLSHYGVTSREQRIPLIYDEQWDVWYDKGDELEERSPIGINQCGTFFFEAEDGDGYIIDRSSDVYITSSLLTEEEFQQMKDEIVHMLEDLLTANEGPATPMRLWRENVEAAQYALEQTKKLHEVLLELEDAPHEQLIREQQLVPSSKIKRFNAEFLINRKLFPFKDKFSIPVNVRSIDILEHRMIRWGLERLIDYADRYLRQARNRKRDLCQRRDFLIYALSSEKDQRLGIWEQKRINNSIKKDLVHVSEFLRLVCESERYWEEIVDIAKKCLNLHYLNVGEEELAQTHLFTFSPLYSEAYQYLDDLLNLKPLKQLSNTYAPLQKSPKLYEVWCLLSIIHSLIYEC…	Geobacillus proteiniphilus	Bacillota
Bacillota	Clostridium saccharobutylicum	LZYZ01000006.1	CLOSAC_30200	gb|OOM10399.1|	MKNEKINLNQEEAIIFETQVISTEGGLNKENEIIISDELRNEEVNLNNSKDIMITEVNSDEIIKMSNENKIEYLEKNVFKSKFVLGRLNKIRDGKNGKYTFVDLVLASDINTNYKINGTNWRAFCDFNYVPNDVKQTLNQGDLIYFKPELNSINPHDIIKVNGTTVKKLTSYKEFLKKENIELTDVKIGGLVELEREEDIRVWATEEFYRNFGQLHDDLLTNVEEEQKKIESIMKEKEKLYKSIQDERDKADKKKKDLEKELERNKKKVDQEIKNKEDMLNNKKREVDSLVRKLEYFGFKGFKDNEEQERLLKHNLLDNTVNELFQYIKNYLKYNKKLIYSDDTIRRFLVALQSNELVILSGPSGTGKSSIVTAVAEAIGGVAKIISVKPSWTETEDLI…	CLOSAC_30220	gb|OOM10401.1|	MNFLKNIENLIYNINKNPYVELVKEDAKVSYKKIKKISSKVIIEKELYPFKNKFMSEVARESKDTYENRMISSALLDIKNLIETNLNMNLNYINKINKDIKITTAQINSMCNTPIPTQKMSASNAEERAILNLGRNNSSDRLPLPMRPHGNLEYFNDLERKLERLNNTIKLLKACKANWTSSNNKIDEYLKLEIFKELKMTQKRREKWRATQVFLHDLTYGKLYRKLKNFCEDSNYNLSDIEEEQLNIKEVYDIFEIWLFFYMAKILIQEQGWKIEDNRNIIKNVNKYLIKNKTLYGFSIEFTHKLAHRDADTIEENRVNMQLVYNKTIKLETGNLRPDFTFIFNCKNVEKRFYLDAKYHNYINNKHAFLNDIKNVAIEKYYLKLLNTEDRAVGSFIIH…	Clostridium saccharobutylicum	Bacillota
Gammaproteobacteria	Moraxella lacunata	MXAN01000015.1	B5J94_03195	gb|OPH38440.1|	MSEINQFLNDDWEYELPARVVGFSRAGSALVRLFLDSIVAINDSMADEKDINLFIGKVQNLNKGDCVIIKMRKSVINYILLNGRLDGSNSANFIRKVDSKKEYQKLLKFSIIQEIDRDINARRDGLKRLAEDFNAILENINILKEIKDLEQANESLKQEKDKLLSFKQENQWLEKIKPYVVSNKNNISDNGNNVDKIITKTQSKPLFNKITKLLKDRFNLSDDFIYCYLLSLFTSLTQGRFLLLTGHIGTGKSSIIKETGKLLGGQTNMVAVRPAWLDASDLLGYFDPINNRYHSTDFVRFIKQENNDHINMILLDELNIARIENYGADILACFAEIGERNQEQNKIHLFNQDLQELIHTYQLFEELNDIQKQKYQHILDRIKQSSSIAIPDNVLICGT…	B5J94_03190	gb|OPH38439.1|	MPDEWQFTAYQVLNIHIDDSNMIGKPFCLKDNQEKIDLINTDRNGRLLKHWLLPYDKHIKPTAGNVDIGYETTNGVVKERIVILPSILDKKEFQEMAKMIGDVVFNCHSFTRADVAQQTNQGINQGGNNNGASSQKQGGYSDYILEQLPSLFKVLEHHIPIIEKSPSLSMRAVKKEIQIHKSNNPKDLLARKLQPNKKITLSYGKSYDDYSPENKWLGYIIFKVLTNLVENLLVGLQEYQKNNTFEYQNNTHHNETVKKINEIKHRLDKIKSNDFIKKFDLKLNRPPQITTRLIKSKGYGEIVRAYQEIFNENFLKAFEFYNDVTTAYSSGYLDNLSNIYEHWCLVVLYDNLLKLGFKPDDDCRLENVIKLQDDNLVIPSESVFVLEKPFTQDEKGKSL…	Moraxella lacunata	Gammaproteobacteria
Bacillota	Geobacillus sp. 46C-IIa	NADR01000015.1	B1690_14255	gb|OQP05152.1|	MNRDSSAGKENIEVITDERQGLQHQLEVILHELDNPVNWTQEQANSFYEGFCRSRKGLGDRLILKITRIIPIKGGKLLIGVVLNPDTFLPFTLPFNNEKWNVSFALNGEAEQVKEGEIVVTVPMALDIEALQGRNDRERRMRSMVSVKRNSVKQAPSQTQLLEIFGHRLERKLGHRIVEKLSEQLGSLEELSNFVLEEFIQIYEDHIQCQNEELDRQEQELEKKKQHLDQRQSQLEEKESSLNERERQLNEKEQQLDEYESRLHSQFERLRLLPPRSLSERLAEEEESGSELIPWNGQGDIIDVIRGALHTQCDLQYERDVIECFVGALKTNQLIILHGPSGTGKSSLVRGFANIIKGAKSYTIRVQPSWTDKQDIVGFLNPIDYQYISTEFLDALVEA…	B1690_14260	gb|OQP05153.1|	MELWIAKVKPDAEHPIQKLEKLLIFDRDHQCYMVTEYEGGVVVKVPNKKVRKVFLSHYGMLDDEERIPLVYDKQWDVWYDQGDESNERAPVGLNQCGTFFFEGEDENGYIIERSGDVYITSSLLTKEEFQQMKDEICSVLEDFLVVYQGPVSPIKRWTKRVETAQNVWERMKKLSVVLIEIAKVPHEKLSQERQLTPVQKIKRLDAQVLINRRLFPFKNQLLAPVNVRSIDIPEHRMIRWGLERIIDQAERHIRQMKNEREVLNRRRQLLKQERQGLRGLNLFDRQKTESSIHKNLGDLSEVEQHLEENERYWDEIRKMANECLQLPYLDVGEEEMEQTHLFIFSPLYREAYQYLDGILNDQPSELSIKQLSHVYVPLQKSPNLYETWCLLSIVHSLIY…	Geobacillus sp. 46C-IIa	Bacillota
Gammaproteobacteria	Klebsiella pneumoniae	MSZJ01000055.1	BVZ24_29040	gb|OSZ10953.1|	MALEQVIYNLEEVKGFSDEELYQRLCESWGITNGKLAVWGKILNGPDSDSRKLPTRLLEIKSLQTGLDTEYPINVRLTMDKGVFVSFKSVEELFGLEDGSFVSCELALAPQSEREKHENPFECNVVVSSVRRLIKLPEYTANDIIKGDENIFLDEAVYKQHLQNVQSRIDSEVTALNAEFEREESSLKAQISSYKDQLQHVQDDLNQKNNVLSQAIAKAQKLEVEHSEWQHKIALQKKAEETMSKKIERLKAYVESKAGFLKSFEFLDDDDFDLFVGSTLSNKDRDEHISFSQAFDSNYSDAVSYIQAHLKERDILYPRHIIENFLTLIRTHDLIILAGDSGSGKTNLVQSFAKAIGGVSKIIPVKPNWTSSEDLLGYYNPLEKKYLVTPFLEALIEAK…	BVZ24_29035	gb|OSZ10952.1|	MMEAPFVIKFIETKWHDKQTLVSVSESEYSLKLEQTGNNAFSAHTTIYPKVDELRFAQLAIKTKQGDQSPPYIVMPNGDRKQLESITDPASNAVWWVEPAHWDAKQRVWRSEARRTAGQITFVIGNSTLKLDIDISEQTKSDLSRYLSDFKADLWELILDENSHITGDAKNSQVAAIGQEALSLVASILSNAQTILKKPKVELKEIQALKPAKEVRPVPRTFMEICTKGSRKHLTSRASEPSYNVPENQYVLYVVSSTLSIVKQLVKVAESKKSRFSGAIEKLNERLDSLKDYRIINRDLVVKDLERLKKRFDTEVINAELSEQLAKINVNLSRSYSEKGYLRLEKATGSENEWWAKIKLSQNDDWQQFEPDGYTIFNSRDHYASLFKAYSDYEIEAKI…	Klebsiella pneumoniae	Gammaproteobacteria
Gammaproteobacteria	Klebsiella quasipneumoniae	MSZK01000102.1	BVZ25_28275	gb|OSZ11770.1|	MALEQVIYNLEEVKGFSDEELYQRLCESWGITNGKLAVWGKILNGPDSDSRKLPTRLLEIKSLQTGLDTEYPINVRLTMDKGVFVSFKSVEELFGLEDGSFVSCELALAPQSEREKHENPFECNVVVSSVRRLIKLPEYTANDIIKGDENIFLDEAVYKQHLQNVQSRIDSEVTALNAEFEREESSLKAQISSYKDQLQHVQDDLNQKNNVLSQAIAKAQKLEVEHSEWQHKIALQKKAEETMSKKIERLKAYVESKAGFLKSFEFLDDDDFDLFVGSTLSNKDRDEHISFSQAFDSNYSDAVSYIQAHLKERDILYPRHIIENFLTLIRTHDLIILAGDSGSGKTNLVQSFAKAIGGVSKIIPVKPNWTSSEDLLGYYNPLEKKYLVTPFLEALIEAK…	BVZ25_28280	gb|OSZ11771.1|	MEAPFVIKFIETKWHDKQTLVSVSESEYSLKLEQTGNNAFSAHTTIYPKVDELRFAQLAIKTKQGDQSPPYIVMPNGDRKQLESITDPASNAVWWVEPAHWDAKQRVWRSEARRTAGQITFVIGNSTLKLDIDISEQTKSDLSRYLSDFKADLWELILDENSHITGDAKNSQVAAIGQEALSLVASILSNAQTILKKPKVELKEIQALKPAKEVRPVPRTFMEICTKGSRKHLTSRASEPSYNVPENQYVLYVVSSTLSIVKQLVKVAESKKSRFSGAIEKLNERLDSLKDYRIINRDLVVKDLERLKKRFDTEVINAELSEQLAKINVNLSRSYSEKGYLRLEKATGSENEWWAKIKLSQNDDWQQFEPDGYTIFNSRDHYASLFKAYSDYEIEAKIP…	Klebsiella quasipneumoniae	Gammaproteobacteria
Gammaproteobacteria	Enterobacter hormaechei	MUDC01000051.1	BZY50_24835	gb|OUK56931.1|	MALEQVIYNLEEVKGFSDEELYQRLCESWGITNGKLAVWGKILNGPDSDSRKLPTRLLEIKSLQTGLDTEYPINVRLTMDKGVFVSFKSVEELFGLEDGSFVSCELALAPQSEREKHENPFECNVVVSSVRRLIKLPEYTANDIIKGDENIFLDEAVYKQHLQNVQSRIDSEVTALNAEFEREESSLKAQISSYKDQLQHVQDDLNQKNNVLSQAIAKAQKLEVEHSEWQHKIALQKKAEETMSKKIERLKAYVESKAGFLKSFEFLDDDDFDLFVGSTLSNKDRDEHISFSQAFDSNYSDAVSYIQAHLKERDILYPRHIIENFLTLIRTHDLIILAGDSGSGKTNLVQSFAKAIGGVSKIIPVKPNWTSSEDLLGYYNPLEKKYLVTPFLEALIEAK…	BZY50_24840	gb|OUK56932.1|	MMEAPFVIKFIETKWHDKQTLVSVSESEYSLKLEQTGNNAFSAHTTIYPKVDELRFAQLAIKTKQGDQSPPYIVMPNGDRKQLESITDPASNAVWWVEPAHWDAKQRVWRSEARRTAGQITFVIGNSTLKLDIDISEQTKSDLSRYLSDFKADLWELILDENSHITGDAKNSQVAAIGQEALSLVASILSNAQTILKKPKVELKEIQALKPAKEVRPVPRTFMEICTKGSRKHLTSRASEPSYNVPENQYVLYVVSSTLSIVKQLVKVAESKKSRFSGAIEKLNERLDSLKDYRIINRDLVVKDLERLKKRFDTEVINAELSEQLAKINVNLSRSYSEKGYLRLEKATGSENEWWAKIKLSQNDDWQQFEPDGYTIFNSRDHYASLFKAYSDYEIEAKI…	Enterobacter hormaechei	Gammaproteobacteria
Gammaproteobacteria	Klebsiella quasipneumoniae subsp. similipneumoniae	NFXX01000068.1	BME31_21635	gb|OVX29028.1|	MALEQVIYNLEEVKGLSDEELYQRLYDSWGLENHKIDVWGELSINEAGNWAGIRNAKTLSGNQSIEYPLADSHELQSGVFLTPSVAKIVLGNDTKGMVACELMLASIPQRAKKNNPFLLAVNDKTVERLTYLPDALPNLDRQALIQNEDETLLRKVIYDAEVKRVKHKIASETEALEAALQEKQQDMTDKLAELSDAFKSTQDKITASTTELESSIKRNEELNNDNHRLNLKIQESKSELDVIIEKSRKVEESMARKVEKLTDFIKEKAIFLKSFEFLDEEDFDFFVGSPLSNKERGEHISFSQALYSNYSDAVSYIQAYLKERDILYPRHIIENFLTLIRTNDLIILAGDSGSGKTNLVQSFAKAIGGVSKIIPVKPNWTSSEDLLGYYNPLEKKYLA…	BME31_21640	gb|OVX29029.1|	MEAPFVIKFIETKWHDKQTLVSVSESEYSLKLEQTGNNAFSAHTTIYPKVDELRFAQLAIKTKQGDQSPPYIAMPNGERRQLESITDPASNEEWWVEPAHWDAKQRVWRSEARRTAGQIMFVIGSSTLKLDIDISEQTKSDLSRYLSDFKADLWELILDESSHITGDAKNSQVAAIDQEALSLVASILSNAQTILKKPKVELKEIQALKPAKEVRPVPRTFMEICTKGSRKHLTSRASEPSYNVPENQYVLYVVSSTLSIVKQLVKVAESKKSRFSGAIEKLNERLDSLKDYRIINRDLVVKDLERLKKRFDTEVINAELSEQLAKINVNLSRSYSEKGYLRLEKATGSENEWWAKIKPSQNDDWQQFEPDGYTIFSSRDHYASLFKSYSDYEIEAKIP…	Klebsiella quasipneumoniae subsp. similipneumoniae	Gammaproteobacteria
Bacillota	Parageobacillus galactosidasius	NDYL01000002.1	B9L23_18670	gb|OXB93126.1|	MESSGRKLQEHLNSLLDELGSPINWTQEEAHQFYVRFCAPQLLGSRLILEVRYVKELQNDNLLLIAEVLNPDTFTPFILPFNGDKWTVAFIVSKDGPEYKKGDILTAVAEELILGELSNEKDKRENRKLGMIFINANSIRRASFETSLLARFGEGVVKKIAELLGPLEKIAPLIVSQLELQMEDKILELEAELNKKENELWANFREQEIKLQEEYRQKEEQFNKEKSKIDRQLKKLEGQKKLISDEESLLDKRKREIEEQKEVLNKEAQRLEEYKKSLKSQFEQFRLVHPLLGNEDDEDNATSNDQIIHWSDQEDIIATIQGALHEQCDLQYERDVIECFVGALKTDQLIILHGPSGTGKSSLARNFSKIIKGAKTYTIRVQSSWTDKQDILGFFNPID…	B9L23_18665	gb|OXB93125.1|	MELWIAEIKSTSERPIQKLISPLIFNEESNCYIASEYEGTIVVKTSNSKVQKVFLSHYGVTSNEQRIPLIYDEQWDVWYDKGNELEERSPIGINQCGTFFFEAEDGEGYIIDRSSDVYITSSLLTEEEFQRMKDEIVNMLEDLLTANEGPATPMKLWRGNVEAARHALDQMKKLHEVLLELEDEPHEQLIREYQLVPSSKIKQFDVKFLISHRIFPFKDKFSIPVNVRSIDIPEHRMIRWGLERLIDYADRYLRQARNRKRDLCRRASSLISALSNQHDKHLNPFEKERIVNSIKKDLHYVIESFQLVSESERHWTKFIELTDTCLSLHYLSVDEEELEQTHLFTFSPLYSEVYQYLDDLLNLKPLKQLSNTYVPLQKSPKLYEIWCLLSIIHSLIYEC…	Parageobacillus galactosidasius	Bacillota
Bacillota	Bacillus sp. KbaL1	NELW01000008.1	B9T53_16895	gb|OXL94967.1|	MVQSIAKDSFTKEEVQNYEDALNSLKYFLLEDNDEIKVEHVDTVYEFLSHSTNTKRQDKQLFAHYLQDIPPGEVKKMKMVLKKLKKGIKENTQGPVEESKKKLIEYGVLNFCSAFLTKPLLHEEKEMIAITENSLKDSEMKTIINQTQLHNKEPKRYDEWLSTEAAQVVTELRTADENNELSALHVNKFVKLFKKYSQGRLLFHINGYIQTEETVRIYGTPMEWTNEGIVPLNHPWKIEEWSISRNNIKAHRVAHLKQNDLVLVNFSGTQNTHFLASLLFIDFTTAEVVPLSLEQSLQEIGGTAFVKQLKDNMSVNTSEEIEAIIIQRLLNVNQELKNQLEKEQQEFVLQQQKLSEEQQMWRRIFYKIEQAIAFEQKEAKVDEVQIHPYKEETFCKQVQ…	B9T53_16900	gb|OXL94968.1|	MKIIHIVLKDREIQAYDELTKSEGIFLASEYTKKDKMTAQIGVIEPAASKVLIEQFKQPVATLTKDNKTNIWYHKPSKWLADGFEQSTDSIFGINAGGSFDIVAYDVDNLELARAQVNITPGTISIKEYAFMQQEVRRLFELFSYDLARESIDNKNILKQTQTKLFNVYKLEEILNEFSDWFLQLVQEPAEQLIHTTKKVALIQLKKWTPKVILEQTLRPDHKVRANVIEKSTAIAEHGMLRLMLEQIKQRIDCESQAEEILINELTDEIVQLSQVIKDKTNHLQEAILALQQVVKQDLITLKARKSIWFQLNSDVQKWLDEPLMDVSPVEIEETHVFSMNPVYSAVYDSYLKFNELQPKLFEAIRPFIQSILKSPTLYEIWIFLKITQQLHQWGVNTD…	Bacillus sp. KbaL1	Bacillota
Gammaproteobacteria	Pseudomonas mandelii	NMOJ01000092.1	B7L09_13230	gb|OYQ19151.1|	MQQDGVSAASGEGYAEELPSLGWSEEDLRYYLAQVWGQRDPLHLRVIGRLQLAEGKTFGFLVDLHHAETGIRLPPPLKNASVRQSVFVPPSELSRIQKLGRIESFASAELDLSPLDERKKRGDPFGCMVHPETLEPLSHIPESWWSIKNIQSEAMPLVVTKVREAIEDRVQRETSEAGDKLLAAQLALEVAAQNKKLLDDEYGRIGLEVDQRMDRIAALDTEFVQRKNTLETRFRELEAFLQDRSERMVALNLIDRADLEKVFPLIGAPDTREGHRFREALAGNLQRLASYIQAFLWRKGILYTRAQLLDFITLLRTNDLIVLAGDSGSGKTNLVKSVASAVGGRCTIVPVKPNWTGSDDLLGYYNPIERRYHPTQFLLALLDAAREPEIPHFICLDEM…	B7L09_13225	gb|OYQ19150.1|	MPPEIEARYLTIDWQSEGVARAIEVAPVSLEIESRTDGEFVVESVIFNDFQPWLGIRVGPGFEEVMPVFVTALGQETPMLQVADPRGGGFWWLRNDGWDHAGKRHLSELQRSAGVYNIRIGDLTLRVENRLSTFGRADIQAYIDDFRGDLLWMIMNDSAGATATGKGAGAGTEFADALKELHTASHRVLASPAVNIREGQAQQPLAKLRPNTVTFREYARNPTARQLTGRVFNESADTAENRYLRHVLAVSLKVADAYVSAASLQSSFLDRLASQESERARRDREMEMRPVEPEVFDQQTEEIKRKLDALADFKSRSGHEADLVGRFPIHLGKRYFDHFAFYYTPQDAMASNVASPVDYRVVVLPKDLFELILGAHHFCKNFTLTGSVDSRVRDTSKGQ…	Pseudomonas mandelii	Gammaproteobacteria
Gammaproteobacteria	Wohlfahrtiimonas chitiniclastica	NEFK01000006.1	B9T21_08810	gb|OYQ86954.1|	MTTIMDLTSEQLWQFSDDQLIEILRKEWGYSKGEPFEVIGQIQPINHFWILDPFYHRSGEHLLSYPNLDDTKPIRNTIYIGSINTSVSKNQWVKIRVELSPLRERKKHENPFDLCAVSNSLTVLEVIPEMATSRENISQDTISQFLSIDGQHYVEKCVLDYYTQKNQEEIKKQTSNFENQLKNDFESQERLIQQLKTDFSELDTKYKRKNTSFKNLKIKVSETSEKLEKLEAHYINQQIQMENQLNTLNNFIEKQATILSDLELISQDELNQILGTPSSQNLSPSHHFINDFDGSLPNAIKYIQAYLFKQGIIYQQSVLEDFCALLMTHDLIILAGDSGSGKTNLVKSFAKAVNGRAVIIPVKPNWTSAEDLLGYYNPLEQKYLSTLFLDTIIEANKNP…	B9T21_08805	gb|OYQ86953.1|	MIDIRYIEISCDENQNINQVTTSDEPIEIQKRSDGLFIETTVFPKIYHYLGFCISDEEVTETPYFQLTNGKKEELFPIKVPGKKVTWWIQNSGWDAINNRFYSEIFRTVGRYKLFIQNQVIEIENESFDLSLQDLEYYLNDFKNGLWNLILNHSSAASAYMSSGNGTINNTFLDLISNFIDHTYKIIANPSAELHEIQANKPIRSVKPIPATFRELALRPNRKNVISRSFTESYNTTENRFIHYCVNRIYFLLKSLQRISEAQNQQLQHKIIQENKYLSQLQLMTHKIIDPIVYDNEIKKLENDLSVLNQKIALMKNNLILGAYPAFSNTKEQIPGKCIIQLSTKHAHNQNQFFCQKFNHVNPQEQFSSYMVIEFPDELIYNLDLEYTTLRIYGTFTKS…	Wohlfahrtiimonas chitiniclastica	Gammaproteobacteria
Gammaproteobacteria	Pseudomonas lundensis	NQKE01000007.1	CJF40_10355	gb|OZY28269.1|	MHNATSGVSSDQESPSLAWSEADLLKFLAQAWDQYTPAHIKVIGRLRLAEGDSFGFLEGLHHAETGIKLGSPSSNSRVHQRVFVPGSEIKDFQSRWGSATYAVAELELSPLEERQKQDDPFTCKVRRGTLAALSHIPESWGVRSIDSESVPLIAEMARQAIDERLAGETAEVEERLRSVRSTLEEVTSEKRLFDDELGRVEREVLQRMDRIELLDAEYMKKREVLDKKNSELEALLRERGERMVALDLVDRADLEKVFPPKGTPDVREGHLFREALAGNLQQLASFIQAHLWRKGIRYTRAHLLDFITLLRSNDLIVLAGDSGSGKTSLVKAVASAVGGRCTIVPVKPNWTGSDDLLGYYNPIERRYHPSQFLMALLDAAREPEIPYFICLDEMNLARV…	CJF40_10360	gb|OZY28270.1|	MLPEIEARYLMIDWRSEGVARAIEVAPVPLEIESLAEGGFIVECTIFNDFHPWLGIRLGSGFEEVVPVFVTASGQEAPMLRVADQLGGGCWWLHHDGWDHFGKRHLSELQRSAGVYNFRIGDVMLQVKNHLSAFGCADIQAYVDDFRGDLLWMIMNDTAGATAAGKGAGTGAELIEALEKLHVASQRVLASPSVTIREGRAPQPVAKLRPNTVSFREYARNPEARQLTGRVFNESADTAENRYLRHMLAVSLKVVDAYISAASLQSDFLDRLALQESERTRRNREMKMRLVDPEVFDQQTEEIKRKLDAFADFKDLSGDEAGRVGRFPIRLGNRYFFEFSFYYTPQETVESNVASPVDYRVVVLPKDLFELILGTHHFCKDFTLSGCVESCVKLTSKGQ…	Pseudomonas lundensis	Gammaproteobacteria
Gammaproteobacteria	Pseudomonas lundensis	NQKG01000006.1	CJF38_08885	gb|OZY55527.1|	MHNATSGVSSDQESPSLAWSEADLLKFLAQAWDQYTPAHIKVIGRLRLAEGDSFGFLEGLHHAETGIKLGSPSSNSRVHQRVFVPGSEIKDFQSRWGSATYAVAELELSPLEERQKQDDPFTCKVRRGTLAALSHIPESWGVRSIDSESVPLIAEMARQAIDERLAGETAEVEERLRSVRSTLEEVTSEKRLFDDELGRVEREVLQRMDRIELLDAEYMKKREVLDKKNSELEALLRERGERMVALDLVDRADLEKVFPPKGTPDVREGHLFREALAGNLQQLASFIQAHLWRKGIRYTRAHLLDFITLLRSNDLIVLAGDSGSGKTSLVKAVASAVGGRCTIVPVKPNWTGSDDLLGYYNPIERRYHPSQFLMALLDAAREPEIPYFICLDEMNLARV…	CJF38_08890	gb|OZY55528.1|	MLPEIEARYLMIDWRSEGVARAIEVAPVPLEIESLAEGGFIVECTIFNDFHPWLGIRLGSGFEEVVPVFVTASGQEAPMLRVADQLGGGCWWLHHDGWDHFGKRHLSELQRSAGVYNFRIGDVMLQVKNHLSAFGCADIQAYVDDFRGDLLWMIMNDTAGATAAGKGAGTGAELIEALEKLHVASQRVLASPSVTIREGRAPQPVAKLRPNTVSFREYARNPEARQLTGRVFNESADTAENRYLRHMLAVSLKVVDAYISAASLQSDFLDRLALQESERTRRNREMKMRLVDPEVFDQQTEEIKRKLDAFADFKDLSGDEAGRVGRFPIRLGNRYFFEFSFYYTPQETVESNVASPVDYRVVVLPKDLFELILGTHHFCKDFTLSGCVESCVKLTSKGQ…	Pseudomonas lundensis	Gammaproteobacteria
Gammaproteobacteria	Klebsiella quasipneumoniae	NQYU01000109.1	CJ307_25860	gb|PAT23427.1|	MALEQVIYNLEEVKGLSDEELYQRLYDSWGLENHKIDVWGELSINEAGNWAGIRNAKTLSGNQSIEYPLADSHELQSGVFLTPSVAKIVLGNDTKGMVACELMLASIPQRAKKNNPFLLAVNDKTVERLTYLPDALPNLDRQALIQNEDETLLRKVIYDAEVKRVKHKIASETEALEAALQEKQQDMTDKLAELSDAFKSTQDKITASTTELESSIKRNEELNNDNHRLNLKIQESKAELDVIIEKSRKVEENMARKVEKLTDFIKEKAIFLKSFEFLDEEDFDFFVGSPLSNKERGEHISFSQALYSNYSDAVSYIQAYLKERDILYPRHIIENFLTLIRTNDLIILAGDSGSGKTNLVQSFAKAIGGVSKIIPVKPNWTSSEDLLGYYNPLEKKYLA…	CJ307_25865	gb|PAT23428.1|	MEAPFVIKFIETKWHDKQTLVSVSESEYSLKLEQTGNNAFSAHTTIYPKVDELRFAQLAIKTKQGDQSPPYIAMPNGERRQLESITDPASNEEWWVEPAHWDAKQRVWRSEARRTAGQIMFVIGSSTLKLDIDISEQTKSDLSRYLSDFKADLWELILDESSHITGDAKNSQVAAIDQEALSLVASILSNAQTILKKPKVELKEIQALKPAKEVRPVPRTFMEICTKGSRKHLTSRASEPSYNVPENQYVLYVVSSTLSIVKQLVKVAESKKSRFSGAIEKLNERLDSLKDYRIINRDLVVKDLERLKKRFDTEVINAELSEQLAKINVNLSRSYSEKGYLRLEKATGSENEWWAKIKPSQNDDWQQFEPDGYTIFSSRDHYASLFKSYSDYEIEAKIP…	Klebsiella quasipneumoniae	Gammaproteobacteria
Bacillota	Bacillus wiedmannii	NUBB01000012.1	CN560_12205	gb|PEO58302.1|	MYFSLLGVLSVIEAITKEKYAEFSPNERQAYVLERLHLEDLWLIGRVRNMKEEKPFFFIDQLQNPYTGVVIEAQIFTDLSRSLSIFCPAGSGEIYYEDGTLVIAKVKLTGVKKDILKGNLFNTTFNEVYPIEDSNELFNLLDMKKEDLRIIALAKPSLYEDGESRFVDVAADIVKAKIADDLKEIDAKNERNEARLLGVQKAEGLLEEAKQQFAIERKHLYSLQQKLEELGFVFNEQDDEQLIKSDESFFETPETPLELLKGMQAQLSARGYHYEEKTLGQLLLALMTEQMIILSGPSGTGKTTIVKQFASIVNAKCEIIPVQPSWTDKQDLLGFYNPIRQLYVPSAFLDCLIEAKQNAEQLYIICLDEMNLAQIEYYLADLLSVRELEGGQLRLYSDF…	CN560_12210	gb|PEO58303.1|	MHVELYMIFVQYDHSVAPQQGLLPISSISIGDKIAPENDQEWVIPNHYRNQNESIMRQIGIRFVDKGRHVKAVSITSPDEMFSNSYVYHSEENIWFEPTRFSTKKRKHYYLYETDSILTGITNAGTAKLSCDEDGQARDFATIHFVPSSLSIEDYEDMIADLYRIHEDFVRDDRNIAKVAIKSNKVVMELQEQLRKLTSAIKQINVSPHATLKLYTTKKKPQNSGRFDLRMEIEQYINPGKPNYRSRELKPVVATFENKLIKQMLEDLIHYATVKGSDQTMTKVLLRNVLNEREAHFRKSDLEIQRLLGSVEMVEDLNTYNRVHSKLMRDIQPYLEEERQIREDVKAKANFISSPNGQIPSTYVELTLAMNGLFTESNSYYHHQSDEGMTAQLKYDRRE…	Bacillus wiedmannii	Bacillota
Bacillota	Bacillus wiedmannii	NUCB01000023.1	CN587_18750	gb|PEQ03344.1|	MIVMKQKTQASTMSKQQDLTKSKVKEILEGMKRDGTLGNEVVIRIEEVHKNTALDGWRYLCYVLDPNDKFNEMKHPLNNYSWNIVFVWKEGAFKEGDVLIGQYKFEHSRKHMGQLIQIVPGTLKHMPRLSTLVDRHGDNFVNHLKDAFGEEEKIIGLIYERWLETVEIDMKEWEEKKETVLKEIGTLNSKFKEKEESVLKEIGTLNSKFKEKEEEFSGLENQITELKQKKKQLKNQIHQLKVVFGFEEGTDFEQTWNNETETYVFTEEEDFYKVLQRALYYYNDENLIYEYDVVKRFFTALQTDQLVLLTGPSGTGKSSLVNQVGQVMQNFKVHHVAVQSSWTDVQDLLGFFNPMKKCYLPTPFLEAIVEARNQEDVIHIICLDEMNLAHVEYYFSSFL…	CN587_18745	gb|PEQ03343.1|	MKPIWIKVSWNQPPLFFQDELFTSKPVEVQVVEELEIQDGVFIATEYTRTADGFLTIGIKTDKSLKRAYAQGKFLYERELVYVSNGIWISCPQYMWSERFKEYQIISSPIGLNQCGTIQFAGETITGERIITNDVKIRPSLVTEVEYIQMEQDLMTITEELMFHAQAGLGNTGKIKSLIDLETLDNQVKQLEEVIRQLEEAPAEKLSSERVRMNVDKLKKIDVRVLLEQEMYPFKQTVNALTTIRSKDIQEHRKIKGAILDFIETCERQSKSERMMKGDLERQLHDVEEFGQKVLGTREAHFQEKFNSKKEWFRLHSEHFTAREKVWAKIVLHLENLSHSYLLQDCEEEEWGDTHIFSFHPVYGEAFETIEQLRKQLRLQEPLKAFQHDLIQSPDLYEK…	Bacillus wiedmannii	Bacillota
Bacillota	Bacillus sp. AFS006103	NTXX01000027.1	CN481_15720	gb|PEQ91736.1|	MVEQLQNTSMDLLEYLDESYEERIKFWEQFVGNNDLRLFGKVHSIKENNCEIINPMVIDNNKHLIPLKFPFGLDYKTILGTLPVTKELMDKKIVQGDYVFFNLDLYGGKKETEPHLIKIKRDTVTKAELFDGYLDALLDVYPGEQPKLNDFAVDTKKKIVYLTENNKPFFNKLIDYDIEKKRKELAYTEDLITVNQGKISDLKVDYERKEEDLKQQLQSEQQIIKATLQKEIEELEEVKNKLETFKLFTAKGKSQPMISQEQPKRKFDHPLEMLEHVKNYLLTDDEKPLYYDAHTLLQFYTGLRTDQLVVLAGSPGTGKTSLVEGFAKAVNAELRIIPVQPNWMDKSDLLGFLNPIEKAYVSTPFLDAILEAKNNPSKLYFICLDEMNLAHIEYYFAEF…	CN481_15715	gb|PEQ91735.1|	MKVKALMAKFILDEEQVQIQNGKFVYKDVIFLENPEQYPELVVGIENRHKTFVAQSHFRGKERGSYFYVLVFQLTDLEVDEDSRDFQIKYSPKKEELEKELYYDEKRQIFFDQPKLKKGRDKKWLYSNSLDKAVFGSVNAGVFYFNVYKKRSTAPVTPNFYKACILPSSLSFEKYQEMLNDILNIRRELVMEQNSSKQSIQLMWKHTLEDIEKAIELIKSPLHRINQLPKTKIEETLMKVPIRNIKKFNSKTVMNLLLNEGNVKSISSQPTESTDIYENQMIYFALSELKRYLEDSETYIFKESLNKKLEIDDQVEQLVEQYGVNNLTDLEELIADSSTNPFFKVNYCRNMFKKLRQRNSEDETIEVIFQVAKYSKNFTPKMSFIHNQLMTTINGSQFD…	Bacillus sp. AFS006103	Bacillota
Bacillota	Bacillus anthracis	NTZN01000023.1	CN518_20315	gb|PET30569.1|	MYFSLLGVLSVIEAITKEKYAEFSPNERQAYVLERLHLEDLWLIGRVRNMKEEKPFFFIDQLQNPYTGVVIEAQIFTDLSRSLSIFCPAGSGEIYYEDGTLVIAKVKLTGVKKDILKGNLFNTTFNEVYPIEDSNELFNLLDMKKEDLRIIALAKPSLYEDGESRFIDVAADIVKAKIADDLKEIDAKNERNEARLLEVQKAEGLLEEAKQQFAIERKHLYSLQQKLEELGFVFNEQDDEQLIKSDESFFETPETPLELLKGMQAQLSARGYHYEEKTLGQLLLALMTEQMIILSGPSGTGKTTIVKQFASIVNAKCEIIPVQPSWTDKQDLLGFYNPIRQLYVPSAFLDCLIEAKQNAEQLYIICLDEMNLAQIEYYLADLLSVRELEGGQLRLYSDF…	CN518_20310	gb|PET30568.1|	MHVELYMIFVQYDHSVAPQQGLLPILSINIGDKIASENDQEWVIPNHYRNQNESIMRQIGIRFVDKGRHVKAISITSPDEMFSNSYVYHSEENIWFEPTRFSTKKRKHYYLYETDSILTGITNAGTAKLRCDEDGQARDFATIHFVPSSLSIEDYEDMIADLYRIHEDFVRDDRNVAKVAIKSNKVVMELQEQLRKLTSAIKQINVSPHATLKLYTTKKKPQNSGRFDLRMEIEQYINPGKPNYRSRELKPVVATFENKLIKQMLEDLIHYATVKGSDQTMTKVLLRNVLNEREAHFRKSDLEIQRLLGSVEMVEDSNTYNRVHSKLMRDIQPYLEEERQIREDVKAKANFISSPNGQIPSMYVELTLAMNGLFTESNSYYHHQSDEGMTAQLKYDRRE…	Bacillus anthracis	Bacillota
Bacillota	Bacillus anthracis	NTUM01000029.1	CN391_25840	gb|PFA47894.1|	MYFSLLGVLSVIEAITKEKYAEFSPNERQAYVLERLHLEDLWLIGRVRNMKEEKPFFFIDQLQNPYTGVVIEAQIFTDLSRSLSIFCPAGSGEIYYEDGTLVIAKVKLTGVKKDILKGNLFNTTFNEVYPIEDSNELFNLLDMKKEDLRIIALAKPSLYEDGESRFVDVAADIVKAKIADDLKEIDAKNERNEARLLGVQKAEGLLEEAKQQFAIERKHLYSLQQKLEELGFVFNEQDDEQLIKSDESFFETPETPLELLKGMQAQLSARGYHYEEKTLGQLLLALMTEQMIILSGPSGTGKTTIVKQFASIVNAKCEIIPVQPSWTDKQDLLGFYNPIRQLYVPSAFLDCLIEAKQNAEQLYIICLDEMNLAQIEYYLADLLSVRELEGGQLRLYSDF…	CN391_25835	gb|PFA47893.1|	MHVELYMIFVQYDHSVAPQQGLLPILSINIGDKIAPENDQEWVIPNHYRNQNESIMRQIGIRFVDKGRHVKAISIKSPDEMFSNSYVYHSEENIWFEPTRFSTKKRKHYYLYETDSILTGITNAGTAKLRCDEDGQARDFAIIHFVPSSLSIEDYEDMIADLYRIHEDFVRDDRNVAKVAIKSNKVVMELQEQLRKLTSAIKQINVSPHATLKLYTTKKKPQNSGRFDLRMEIEQYINPGKPNYRSRELKPVVATFENKLIKQMLEDLIHYATVKGSDQTMTKVLLRNVLNEREAHFRKSDLEIQRLLGSVEMVEDLNTYNRVHSKLMRDIQPYLEEERQIREDVKAKANFISSPNGQIPSTYVELTLAMNGLFTESNSYYHHQSDEGMTAQLKYDRRE…	Bacillus anthracis	Bacillota
Bacillota	Bacillus cereus	NTSH01000015.1	CN315_14725	gb|PFF07161.1|	MVEQIQSEQMNLLDYLEKSYGERSKFWEQFVGNSDLRLFGKVHSIKENNCEIINPRIIDNNKHLSPLKFPFGLDYKTIPGTLPVTKELINKKIVHGDYVFFNLDLYGGKKETESHLIKIKRDTVMKADLVDGYLATLLDVYPEERPKLNDFAVDTKKKIAYLTGNNKPLFNKLIEYDIEEKRKVLAYTEDLITVNQGEISILKEDYGRIEEDLKQRLQLEHQRMKATLQEEIDEMEEIKNKLETFKLFTAKGKSKSVIPREKPKIKFDNPLEMLEHVKNYLLTDDEKPLYFDTQTLLQFYTGLRTDQLVVLAGSPGTGKTSLVEGFSKAVDAELRIIPVQPNWMDKSDLLGFLNPIEKTYVSTPFLDAILEAKNNPSKLYFICLDEMNLAHIEYYFAEF…	CN315_14730	gb|PFF07162.1|	MKVKALMARFILDEEQVQNQNGKFVYKDVIFLENLEKYPELVVGIENRHKTFVAQSHFRGQERGSDFYVLVFQLTDLADDEEPSDFQIKYSPKKEVLEKELHYDEKRKIFFDQPKLKKGRDKKWSYSNSLDKAVFGSVNAGVFFFNVYKKGSITPVSPDFYKACILPSSLSFEKYQEMLNDIINIRRELIMEHNASKQSIQLMWKHTLEDIEKSIEQIHSPLIRINQQPKTKIEESFTKVPIRNIKRFNSKTVMNLLLNEGNVKVISSQPSESTDIYENQMICFALSELKRYLEDSKMYIYKESLQRKLEIDDQVGQLVEQYGVHNLTDLEELISDSSTNPFFKVNYCRNMFKQLRSQNNEDDTIEVIFQVAKYNQNFTPKMSFIYHQLMTTINGYQFD…	Bacillus cereus	Bacillota
Bacillota	Bacillus anthracis	NUVW01000038.1	COI92_23840	gb|PFJ24553.1|	MIVMKQKTQASTMSKQQDLTKSKVKEILEGMKRDGTLGNEVVIRIEEVHKNTALDGWRYLCYVLDPNDKFNEMKHPLNNYSWNIVFVWKEGAFKEGDVLIGQYKFEHSRKHMGQLIQIVPGTLKHMPRLSTLVDRHGDNFVNHLKDAFGEEEKIIGLIYERWLETVEIDMKEWEEKKETVLKEIGTLNSKFKEKEESVLKEIGTLNSKFKEKEEEFSGLENQITELKQKKKQLKNQIHQLKVVFGFEEGTDFEQTWNNETETYVFTEEEDFYKVLQRALYYYNDENLIYEYDVVKRFFTALQTDQLVLLTGPSGTGKSSLVNQVGQVMQNFKVHHVAVQSSWTDVQDLLGFFNPMKKCYLPTPFLEAIVEARNQEDVIHIICLDEMNLAHVEYYFSSFL…	COI92_23845	gb|PFJ24554.1|	MKPIWIKVSWNQPPLFFQDELFISKPVEAQVVEELEIQDGAFIATEYTRTTDGFLTIGIKTDKSLKRAYARGKFLYERELVYVSNGIWISCPQYMWSERFKEYQIISSPIGLNQCGTIQFAGETITGERIITNDVKIRPSLVTEAEYIQMEQDLMTITEELMFHAQAGLGNTGKIKSLIDLETLDNQVKQLEEVIRQLEEVPAEKLSSERVRMNVDKLKKIDVRVLLEQEMYPFKQTVNALTTIRSKDIQEHRKIKGAILDFIETCERQSKSERMMKVDLEGQLHDVEESSQKVIGTREAHFHEKFNSKKEWFRLHSEHFTERDKVWTKIILHLENLSHSYLLQDCEEEEWGDTHIFSFHPLYEEAFETIEQLREQLRLQEPLKAFQHDLIQSPDLYEK…	Bacillus anthracis	Bacillota
Bacillota	Bacillus wiedmannii	NVIO01000015.1	COM25_10030	gb|PGC75952.1|	MYFSLLGVLSVIEAITKEKYAEFSPNERQAYVLERLHLEDLWLIGRVRNMKEEKPFFFIDQLQNPYTGVVIEAQIFTDLSRSLSIFCPAGSGEIYYEDGTLVIAKVKLTGVKKDILKGNLFNTTFNEVYPIEDSNELFNLLDMKKEDLRIIALAKPSLYEDGESRFVDVAADIVKAKIADDLKEIDAKNERNEARLLGVQKAEGLLEEAKQQFAIERKHLYSLQQKLEELGFVFNEQDDEQLIKSDESFFETPETPLELLKGMQAQLSARGYHYEEKTLGQLLLALMTEQMIILSGPSGTGKTTIVKQFASIVNAKCEIIPVQPSWTDKQDLLGFYNPIRQLYVPSAFLDCLIEAKQNAEQLYIICLDEMNLAQIEYYLADLLSVRELEGGQLRLYSDF…	COM25_10035	gb|PGC75953.1|	MHVELYMIFVQYDHSVAPQQGLLPISSISIGDKIAPENDQEWVIPNHYRNQNESIMRQIGIRFVDKGRHVKAVSITSPDEMFSNSYVYHSEENIWFEPTRFSTKKRKHYYLYETDSILTGITNAGTAKLSCDEDGQARDFATIHFVPSSLSIEDYEDMIADLYRIHEDFVRDDRNIAKVAIKSNKVVMELQEQLRKLTSAIKQINVSPHATLKLYTTKKKPQNSGRFDLRMEIEQYINPGKPNYRSRELKPVVATFENKLIKQMLEDLIHYATVKGSDQTMTKVLLRNVLNEREAHFRKSDLEIQRLLGSVEMVEDLNTYNRVHSKLMRDIQPYLEEERQIREDVKAKANFISSPNGQIPSTYVELTLAMNGLFTESNSYYHHQSDEGMTAQLKYDRRE…	Bacillus wiedmannii	Bacillota
Bacillota	Bacillus anthracis	NUFM01000001.1	CN900_00120	gb|PGK01418.1|	MYFSLLGVLSVIEAITKEKYAEFSPNERQAYVLERLHLEDLWLIGRVRNMKEEKPFFFIDQLQNPYTGVVIEAQIFTDLSRSLSIFCPAGSGEIYYEDGTLVIAKVKLTGVKKDILKGNLFNTTFNEVYPIEDSNELFNLLDMKKEDLRIIALAKPSLYEDGESRFVDVAADIVKAKIADDLKEIDAKNERNEARLLGVQKAEGLLEEAKQQFAIERKHLYSLQQKLEELGFVFNEQDDEQLIKSDESFFETPETPLELLKGMQAQLSARGYHYEEKTLGQLLLALMTEQMIILSGPSGTGKTTIVKQFASIVNAKCEIIPVQPSWTDKQDLLGFYNPIRQLYVPSAFLDCLIEAKQNAEQLYIICLDEMNLAQIEYYLADLLSVRELEGGQLRLYSDF…	CN900_00115	gb|PGK01417.1|	MHVELYMIFVQYDHSVAPQQGLLPILSINIGDKIAPENDQEWVIPNHYRNQNESIMRQIGIRFVDKGRHVKAISIKSPDEMFSNSYVYHSEENIWFEPTRFSTKKRKHYYLYETDSILTGITNAGTAKLRCDEDGQARDFATIHFVPSSLSIEDYEDMIADLYRIHEDFVRDDRNVAKVAIKSNKVVMELQEQLRKLTSAIKQINVSPHATLKLYTTKKKPQNSGRFDLRMEIEQYINPGKPNYRSRELKPVVATFENKLIKQMLEDLIHYATVKGSDQTMTKVLLRNVLNEREAHFRKSDLEIQRLLGSVEMVEDLNTYNRVHSKLMRDIQPYLEEERQIREDVKAKANFISSPNGQIPSTYVELTLAMNGLFTESNSYYHHQSDEGMTAQLKYDRRE…	Bacillus anthracis	Bacillota
Bacillota	Bacillus anthracis	NUND01000076.1	COD75_27560	gb|PGV29907.1|	MYFSLLGVLSVIEAITKEKYAEFSPNERQAYVLERLHLEDLWLIGRVRNMKEEKPFFFIDQLQNPYTGVVIEAQIFTDLSRSLSIFCPAGSGEIYYEDGTLVIAKVKLTGVKKDILKGNLFNTTFNEVYPIEDSNELFNLLDMKKEDLRIIALAKPSLYEDGESRFVDVAADIVKAKIADDLKEIDAKNERNEARLLGVQKAEGLLEEAKQQFAIERKHLYSLQQKLEELGFVFNEQDDEQLIKSDESFFETPETPLELLKGMQAQLSARGYHYEEKTLGQLLLALMTEQMIILSGPSGTGKTTIVKQFASIVNAKCEIIPVQPSWTDKQDLLGFYNPIRQLYVPSAFLDCLIEAKQNAEQLYIICLDEMNLAQIEYYLADLLSVRELEGGQLRLYSDF…	COD75_27565	gb|PGV29908.1|	MHVELYMIFVQYDHSVAPQQGLLPILSINIGDKIAPENDQEWVIPNHYRNQNESIMRQIGIRFVDKGRHVKAISIKSPDEMFSNSYVYHSEENIWFEPTRFSTKKRKHYYLYETDSILTGITNAGTAKLRCDEDGQARDFATIHFVPSSLSIEDYEDMIADLYRIHEDFVRDDRNVAKVAIKSNKVVMELQEQLRKLTSAIKQINVSPHATLKLYTTKKKPQNSGRFDLRMEIEQYINPGKPNYRSRELKPVVATFENKLIKQMLEDLIHYATVKGSDQTMTKVLLRNVLNEREAHFRKSDLEIQRLLGSVEMVEDLNTYNRVHSKLMRDIQPYLEEERQIREDVKAKANFISSPNGQIPSTYVELTLAMNGLFTESNSYYHHQSDEGMTAQLKYDRRE…	Bacillus anthracis	Bacillota
Bacillota	Bacillus thuringiensis	NUOA01000025.1	COE21_21390	gb|PGW74490.1|	MVEQLQREQMNLLDYLEKPYEERSKFWEQFVGNSDLRLFGKVHSIKENNCEIINPRIIDNNKHLSPLKFPFGLNYKTILGTLPVTKELIDKKIVHGDYVFFNLDLYGGKRETEPHLIKIKKDTVMKAELVDGYLANLLDAYPEERPILNDCAVDTKKKIAYLTKNNKHFFNKLIEYDIQEKRKVLAYTEDLITAHQGEISILKEDYERIEEDLKQQLQLEQQRMKATLQQEIDEMEEIRNNLEIFRLFTEKGKSKSVISREKTKRKFDHPLEMIEHVKNYLLTDDEKPLYFDTQTLLQFYTGLRTDQLVVLAGRPGTGKTSLVEGFSKAVDAELRIIPVQPNWMDKSDLLGFLNPIEKTYVSTPFLDAILEAKNNPSKLYFICLDEMNLAHIEYYFAEF…	COE21_21385	gb|PGW74489.1|	MKVEALMAKFILDEEQVQNQNGKFVYKDVIFLENLEQYPELVVGIENRHKTFVAQSHFRGQERGSEFYVLVFQLTDLADDEDPSNFQIKYSPKKEVLEKELQYDEKRQIFFDQPKLKKGRDKKWAYSNSLDKAVFGSVNAGVFFFNVYKKGSITPVSPNFYKACILPSSLSFEKYQEMLNDIINIRRELIMEHNASKQSIQLMWKHTLEDIEKSIEQIHSPLIRINQQPKVKIEERFTKVPIRNIKKFNSKTVMNLLLNEGNVKMISSQPSESTDIYENQMICFALLELKRYLEDSKMYISKESLQRKLEIDDQVGQLVGQYGVHNLTDLEELISDSSINPFFKVNYCRNMFKKLKSQNNEDETIEVIFQVAKYNQNFTPKMSFIYHQLMTTINGYQFD…	Bacillus thuringiensis	Bacillota
Bacillota	Bacillus cereus	NUPQ01000035.1	COE46_17850	gb|PGZ14689.1|	MVHNIADSNHFTDDRNEITKEMVQEQVDTFKKEGVIGKEVVVRIKKVQNLSDQLWFYKCQVLNVNDSFHKLHNPLTNDSWTITFLLKEKRFEKGDILIGSYNLETRPKYIGNLIKFVPNTLRNIPTVEHIKEKHGEQFITLLRKMFGREDRVLGLMYESWLETTEKDIEDYEQDIKKLNKELESLHQQVEELQMKREDLKAETFGFKKEVVNLEAETVGLKEKKRDLKSQIRNIKVAFGFEEESALNLEKTTEELVECTGESDLYKTIQLALYHHNDENLIYEHHVIERFITALQTDQLVLLTGPSGTGKSSLVNQLGEVIDNFKIHHVAVQSSWTDVQDLLGFFNPMKKSYLPTPFLEALVQARQEKESIHIICLDEMNLAHVEYYFSSFLSVREKHP…	COE46_17845	gb|PGZ14688.1|	MKPIWVKAHWNCPEHFLGECIEGTITELQALQELDMEDGIFVATEYNRGENEFLTIGVRANEDVTRVYATGKFSYERELLHVNEGIWLSSPQYVWNERFQRYENVSPSIGLNQCGIIRFVGETKDDGKITTGDVKIKPSLLTEAEYVQMEEDILTITEELLFHTQINTGNTGEMRALIQLDSLQQAAKNIGDIVQQLEKNPAERLSTKRVKTDIDKLRKMDIRVLLEQEMYPFKRTVNALTTVRAHDISEHRKLKGALIDCIESCMRQKKKEKNVRDSLERQLKEVEELSYKVLISHEKNLYSKFISKKQWLCKQMEELTPRDERWKKLITYLEDVLSSYLFQDCETEEWGDTHLFNFHPLYEEAFEGIEELQKCLRQHEPLKAFQHDLLQSPDLYEKW…	Bacillus cereus	Bacillota
Bacillota	Bacillus wiedmannii	NUSC01000021.1	COF42_16050	gb|PHC86982.1|	MIVMKQKTQASTMSKQQDLTKSKVKEILEGMKRDGTLGNEVVIRIEEVHKNTALDGWRYLCYVLDPNDKFNEMKHPLNNYSWNIVFVWKEGAFKEGDVLIGQYKFEHSRKHMGQLIQIVPGTLKHMPRLSTLVDRHGDNFVNHLKDAFGEEEKIIGLIYERWLETVEIDMKEWEEKKETVLKEIGTLNSKFKEKEESVLKEIGTLNSKFKEKEEEFSGLENQITELKQKKKQLKNQIHQLKVVFGFEEGTDFEQTWNNETETYVFTEEEDFYKVLQRALYYYNDENLIYEYDVVKRFFTALQTDQLVLLTGPSGTGKSSLVNQVGQVMQNFKVHHVAVQSSWTDVQDLLGFFNPMKKCYLPTPFLEAIVEARNQEDVIHIICLDEMNLAHVEYYFSSFL…	COF42_16045	gb|PHC86981.1|	MKPIWIKVSWNQPPLFFQDELFTSKPVEVQVVEELEIQDGVFIATEYTRTADGFLTIGIKTDKSLKRAYAQGKFLYERELVYVSNGIWISCPQYMWSERFKEYQIISSPIGLNQCGTIQFAGETITGERIITNDVKIRPSLVTEVEYIQMEQDLMTITEELMFHAQAGLGNTGKIKSLIDLETLDNQVKQLEEVIRQLEEAPAEKLSSERVRMNVDKLKKIDVRVLLEQEMYPFKQTVNALTTIRSKDIQEHRKIKGAILDFIETCERQSKSERMMKGDLERQLHDVEEFGQKVLGTREAHFQEKFNSKKEWFRLHSEHFTAREKVWAKIVLHLENLSHSYLLQDCEEEEWGDTHIFSFHPVYGEAFETIEQLRKQLRLQEPLKAFQHDLIQSPDLYEK…	Bacillus wiedmannii	Bacillota
Bacillota	Bacillus wiedmannii	NUSJ01000043.1	COF58_27030	gb|PHD20163.1|	MIVMKQKTQASTMSKQQDLTKSKVKEILEGMKRDGTLGNEVVIRIEEVHKNTALDGWRYLCYVLDPNDKFNEMKHPLNNYSWNIVFVWKEGAFKEGDVLIGQYKFEHSRKHMGQLIQIVPGTLKHMPRLSTLVDRHGDNFVNHLKDAFGEEEKIIGLIYERWLETVEIDMKEWEEKKETVLKEIGTLNSKFKEKEESVLKEIGTLNSKFKEKEEEFSGLENQITELKQKKKQLKNQIHQLKVVFGFEEGTDFEQTWNNETETYVFTEEEDFYKVLQRALYYYNDENLIYEYDVVKRFFTALQTDQLVLLTGPSGTGKSSLVNQVGQVMQNFKVHHVAVQSSWTDVQDLLGFFNPMKKCYLPTPFLEAIVEARNQEDVIHIICLDEMNLAHVEYYFSSFL…	COF58_27035	gb|PHD20164.1|	MKPIWIKVSWNQPPLFFQDELFTSKPVEVQVVEELEIQDGVFIATEYTRTADGFLTIGIKTDKSLKRAYAQGKFLYERELVYVSNGIWISCPQYMWSERFKEYQIISSPIGLNQCGTIQFAGETITGERIITNDVKIRPSLVTEVEYIQMEQDLMTITEELMFHAQAGLGNTGKIKSLIDLETLDNQVKQLEEVIRQLEEAPAEKLSSERVRMNVDKLKKIDVRVLLEQEMYPFKQTVNALTTIRSKDIQEHRKIKGAILDFIETCERQSKSERMMKGDLERQLHDVEEFGQKVLGTREAHFQEKFNSKKEWFRLHSEHFTAREKVWAKIVLHLENLSHSYLLQDCEEEEWGDTHIFSFHPVYGEAFETIEQLRKQLRLQEPLKAFQHDLIQSPDLYEK…	Bacillus wiedmannii	Bacillota
Bacillota	Bacillus toyonensis	NUSN01000057.1	COF67_25315	gb|PHD44840.1|	MIVMKQKTQASTMSKQQDLTKSKVKEILEGMKREGTLGNEVVIRIEEIHKNTVSDGWRYLCYVLDPNDKFNEMKHPLNNYSWNIVFVWKEGAFKEGDVLIGQYKFEQNRKHMGQLIQIVPATLKHMPRLSTLIDRHGDNFVNHLQDAFGGEEKIVGLIYERWLETVEIDMKEWEEKKESVLAELGILNSKFKEKEEEFSDLKNQTTELEHKKKKLENQIHQLKVVFGFEEGADFEQTWNDETETYVFTEEEDFYKVLQRALYYYNDENLIYEYDIVKRFFTALQTDQLVLLTGPSGTGKSSLVNQVGQVMQNFKVHHVAVQSSWTDVQDLLGFFNPMKKCYLPTPFLEAIVEARNQEDVIHIICLDEMNLAHVEYYFSSFLSVREKQPNERYVDLYSER…	COF67_25320	gb|PHD44841.1|	MDIKPIWIKVSWNQPPLFFQDELFTSTPVEVQVIEELEVQDGVFIATEYTRTANGFLTIGIKTDKSLNRAYAQGKFLYERELLYVSNGIWISCPQYMWSEQFKEYQIISVPIGLNQCGTIQFAGETITGERIITNDVKIRPSLFTEVEYIQMEQDLMTITEELMFHAQAGLGNTGKIKSLIDLETLDNQVKQLEEVIRQLEEAPAEKLSSERVGMNVDKLKKIDVRVLLEQEMYPFKQTVNALTTIRSKDIQEHRKMKGAILDFIETCERQSKSERMMKGDLERQLHDVEEFGQKVLGTKEAHFQEKFNSKKEWFRLHSEHFTAREKVWAKIVLHLENLSHSYLLQDCEEEEWGDTHIFSFHQVYGEAFETIEQLRKQLRLQEPLKAFQHELIQSPDLY…	Bacillus toyonensis	Bacillota
Bacillota	Bacillus wiedmannii	NUUI01000031.1	COI74_17960	gb|PHG19451.1|	MYFSLLGVLSVIEAITKEKYAEFSPNERQAYVLERLHLEDLWLIGRVRNMKEEKPFFFIDQLQNPYTGVVIEAQIFTDLSRSLSIFCPAGSGEIYYEDGTLVIAKVKLTGVKKDILKGNLFNTTFNEVYPIEDSNELFNLLDMKKEDLRIIALAKPSLYEDGESRFVDVAADIVKAKIADDLKEIDAKNERNEARLLGVQKAEGLLEEAKQQFAIERKHLYSLQQKLEELGFVFNEQDDEQLIKSDESFFETPETPLELLKGMQAQLSARGYHYEEKTLGQLLLALMTEQMIILSGPSGTGKTTIVKQFASIVNAKCEIIPVQPSWTDKQDLLGFYNPIRQLYVPSAFLDCLIEAKQNAEQLYIICLDEMNLAQIEYYLADLLSVRELEGGQLRLYSDF…	COI74_17955	gb|PHG19450.1|	MHVELYMIFVQYDHSVAPQQGLLPISSISIGDKIAPENDQEWVIPNHYRNQNESIMRQIGIRFVDKGRHVKAVSITSPDEMFSNSYVYHSEENIWFEPTRFSTKKRKHYYLYETDSILTGITNAGTAKLSCDEDGQARDFATIHFVPSSLSIEDYEDMIADLYRIHEDFVRDDRNIAKVAIKSNKVVMELQEQLRKLTSAIKQINVSPHATLKLYTTKKKPQNSGRFDLRMEIEQYINPGKPNYRSRELKPVVATFENKLIKQMLEDLIHYATVKGSDQTMTKVLLRNVLNEREAHFRKSDLEIQRLLGSVEMVEDLNTYNRVHSKLMRDIQPYLEEERQIREDVKAKANFISSPNGQIPSTYVELTLAMNGLFTESNSYYHHQSDEGMTAQLKYDRRE…	Bacillus wiedmannii	Bacillota
Gammaproteobacteria	Pseudomonas syringae	LKBX01000035.1	AO254_08495	gb|PHN44728.1|	MSVFVPPSELRTYLKTGQVDGFAVAELDLSPLIERTSRADPLACMVRPNTLEPLSHIPESWWHIQDIQSAPLPFIVTKVRDAMEDLVRRETAQAGEKLQAMREEVEATVDRKAVLDDEYRRTEVEIGQRTDRIAALEAEFAQRTSTLQNKFGELESFFRERGERMVALNLVDRADIEKVLPSQTTFDARNGHHFDKELEGSLERLASYIQAFLWRKGVLFTRAQLLDFITLLRTNDLIVLAGDSGSGKTSLVKSFAQAVGGRCTVVPVKPNWTGSDDLLGYYNPIERRYHPSQFLLALLEAAREPQIPHFICLDEMNLARVEYYFADFLSLLETRSQAPWIHLYSSTEERQAIVDNKIFLTLEEEARKRAGLADDASFCEILMNDQANLELRRLAGFQE…	AO254_08490	gb|PHN44727.1|	MSLQIEVRYLMINWQSEGVARDIKAAPHALEIERDASGELSVESTVFNDFHPWLGIRLESALDNTIPVFVSASGEETPMLRIADQQGCGQWWLQHDGWDPLNKRHFSELHRSAGAYFIRLGNLRLRIENRLSSFGRADIQAYINDFRGDLLWMIMNDAATATASGQGPGAGAELAVALKALTAASNRVLASPAVNIREGQAPQSIAKLRPNAATFNEYLRNPAARYFTGRVFNESADIPENRYVRHILAVALKVAAAYMSAATLQTDFLRRLTSQEAERASRDSAIKSRAVDPEVFDHQTQEIERRLEALTCFTGPSTEYPDQIARFPIRLGKRYGDKCAFFYERQDGQQASGDAEIDYRVVVLPEDEFELILAAHHFCKDLTLAGCAQTSVKNTSSGK…	Pseudomonas syringae	Gammaproteobacteria
Alphaproteobacteria	Rhodobacterales bacterium	PDRZ01000011.1	CSA70_00740	gb|PIE14919.1|	MSVIEAEIKTEREKLQEELGVLQNETAEAGGALNGLRHAVAGEERKLVTLQEKSEREIALMETRVRRLNDLLDQKGRRLVALGLIDEDDLAVLLPSSGEHSEQPGHSFQSDFGGDFERLAPFIQARLYARGMLFSQAQLRDVLALVRTHDLFVLAGDSGSGKTSLIKATAESLGGRCTIVPVKPNWTGPEDLLGYFNPIERSYQSTPFLKALQLAASEPHILHFIVLDEMNLARVEHYFADFLSLLENRETVPDITLYTSDEERHTVVSHGLFLAIEEEVRKRVGLPETATLEDLLKNEEANRLLHRLGGFEDAESILEHHARLRRAMAAQIRTPTSLAMPPNVRIIGAINIDETTYFLSPKVLDRIHVVRFRNPVLQDWSAIDAEVEESDLDLALPLY…	CSA70_00730	gb|PIE14912.1|	MSFRQYVRNPSVNRLQGRQAEVTVDIAENRYIRHMVQVAAKLSEKLALATARQVQTLEERAKSEIERCKEYRATQYRKVESSVFDRQLAEAQETLERIRGLFEWHSEQFPADARHVEISIGKPFGKGGNTFFCNKPDGKPTNDPSRGIKYWVIKLPDALASAVTAARPLRPTYKIDAVMSVQAIGPEDQGRLLELHQVIAVEPRSEAIGRKLRKRARLAESDWLAPLSREERFELQQEARTAELRANAYSERAAAGNSAASALDRSWKRLSRQDRDWGRMGVRSDPQMPFGMRFSQTPVYSACLAAFRKVSELADRAGFGEDTLDAVDRIGILHASALYEHWCLIKILLVLIEEFRFVPQAGWQELLIRGVTGNRETVSIELEHESFDLCAKLDIQPVL…	Rhodobacterales bacterium	Alphaproteobacteria
Alphaproteobacteria	Alphaproteobacteria bacterium HGW-Alphaproteobacteria-5	PHED01000032.1	CVT83_02295	gb|PKP71973.1|	MRPLSELPAEWQVTISGPESARRISSLARHEIEVHVRHELLQEDEELARRHADNIETLSRLHTERRQAQDDARTAQAEIESELAKYRQRRDDAERSAADFEIKLGIERDQFAAYKSTLEQEKQVMEINYRRLTDLLIEKGNRLVALGLADAEDVAALMPEMTSSEDERSGITFADALAGDYARLAPLLQTRMADVGLLYSQAQLRDLLALLRTRDLIVLAGDSGSGKTSLVRAAAAAIGGISTVIPVKPNWTGPEDLLGYYNPIERSYQATPFLLALQAAARNPHVPHFICLDEMNLARVEHYFADFLSLLESRSTSPEIHLYTADEERHVVVEQSIFLGVEAEARRRSGLPDTATLEEILRHDQANAELHRIGGLADNESVMVYHARLRRSLAAQLRM…	CVT83_02300	gb|PKP71967.1|	MGVLAHYLDIEWQAPGVARRVEVSTYPIEIEAAPDGTLHAEVSIFRDSAPWVGLQVSGPLACVEPCTINAQNERLPWLQVSDEHDRTWWIPETGWSKTGNKHVSEMHRSFGSFAVELGSDQKLILDAVALELDRAHAQEYLDDFRDELVWLAIGSRTGALGEVGSENSLYLLDALKAFTDAASHVLVHPAREIREVTAAVATSRVRPNSETFRAVMRRPGGRTHPGRAAQESANIPENRYLRGLIEHCRRLARSVARSSSHHQAHLAARTTRERLRAAELLAVESVEIDPEIFDNQLSDIRARLDAVATWPSSMLEPQESERLYRFTVGKEFKAERGAAKEFFYHNPDRVDRDDERQGINFSVARLPAELHDLVISTSRFDKDVRLDLIGKAEITTFQT…	Alphaproteobacteria bacterium HGW-Alphaproteobacteria-5	Alphaproteobacteria
Gammaproteobacteria	Klebsiella variicola	NCLI01000104.1	B6I40_28570	gb|PLC74615.1|	MALEQVIYNLEEVKGLSDEELYQRLYDSWGLENHKIDVWGELSINEAGNWAGIRNAKTLSGNQSIEYPLADSHELQSGVFLTPSVAKIVLGNDTKGMVACELMLASIPQRAKKNNPFLLAVNDKTVERLTYLPDALPNLDRQALIQNEDETLLRKVIYDAEVKRVKHKIASETEALEAALQEKQQDMTDKLAELSDAFKSTQDKITASTTELESSIKRNEELNNDNHRLNLKIQESKSELDVIIEKSRKVEESMARKVEKLTDFIKEKAIFLKSFEFLDEEDFDFFVGSPLSNKERGEHISFSQALYSNYSDAVSYIQAYLKERDILYPRHIIENFLTLIRTNDLIILAGDSGSGKTNLVQSFAKAIGGVSKIIPVKPNWTSSEDLLGYYNPLEKKYLA…	B6I40_28565	gb|PLC74614.1|	MEAPFVIKFIETKWHDKQTLVSVSESEYSLKLEQTGNNAFSAHTTIYPKVDELRFAQLAIKTKQGDQSPPYIAMPNGERRQLESITDPASNEEWWVEPAHWDAKQRVWRSEARRTAGQIMFVIGSSTLKLDIDISEQTKSDLSRYLSDFKADLWELILDESSHITGDAKNSQVAAIDQEALSLVASILSNAQTILKKPKVELKEIQALKPAKEVRPVPRTFMEICTKGSRKHLTSRASEPSYNVPENQYVLYVVSSTLSIVKQLVKVAESKKSRFSGAIEKLNERLDSLKDYRIINRDLVVKDLERLKKRFDTEVINAELSEQLAKINVNLSRSYSEKGYLRLEKATGSENEWWAKIKPSQNDDWQQFEPDGYTIFSSRDHYASLFKSYSDYEIEAKIP…	Klebsiella variicola	Gammaproteobacteria
Gammaproteobacteria	Klebsiella pneumoniae	NCNZ01000061.1	B6J11_27170	gb|PLG58804.1|	MALEQVIYNLEEVKGLSDEELYQRLYDSWGLENHKIDVWGELSINEAGNWAGIRNAKTLSGNQSIEYPLADSHELQSGVFLTPSVAKIVLGNDTKGMVACELMLASIPQRAKKNNPFLLAVNDKTVERLTYLPDALPNLDRQALIQNEDETLLRKVIYDAEVKRVKHKIASETEALEAALQEKQQDMTDKLAELSDAFKSTQDKITASTTELESSIKRNEELNNDNHRLNLKIQESKSELDVIIEKSRKVEESMARKVEKLTDFIKEKAIFLKSFEFLDEEDFDFFVGSPLSNKERGEHISFSQALYSNYSDAVSYIQAYLKERDILYPRHIIENFLTLIRTNDLIILAGDSGSGKTNLVQSFAKAIGGVSKIIPVKPNWTSSEDLLGYYNPLEKKYLA…	B6J11_27175	gb|PLG58805.1|	MEAPFVIKFIETKWHDKQTLVSVSESEYSLKLEQTGNNAFSAHTTIYPKVDELRFAQLAIKTKQGDQSPPYIAMPNGERRQLESITDPASNEEWWVEPAHWDAKQRVWRSEARRTAGQIMFVIGSSTLKLDIDISEQTKSDLSRYLSDFKADLWELILDESSHITGDAKNSQVAAIDQEALSLVASILSNAQTILKKPKVELKEIQALKPAKEVRPVPRTFMEICTKGSRKHLTSLASEPSYNVPENQYVLYVVSSTLSIVKQLVKVAESKKSRFSGAIEKLNERLDSLKDYRIINRDLVVKDLERLKKRFDTEVINAELSEQLAKINVNLSRSYSEKGYLRLEKATGSENEWWAKIKPSQNDDWQQFEPDGYTIFSSRDHYASLFKSYSDYEIEAKIP…	Klebsiella pneumoniae	Gammaproteobacteria
Gammaproteobacteria	Superficieibacter electus	PQGE01000051.1	CHU33_27255	gb|POP40440.1|	MSNKVYGYSELEGLSDTELLATLQSSWGYKDDNFEVWGEVTLFKDREWGHLKNPRMLASNNLLSYPLTGVNGPCEFWINPADAKKYGDQRGARFIKCKLTLSRPKEREKHRIPFMMSVLPGSCSSLEKLPASIPHDIVTADDVSYFIANEIYHFYQQQAATKIEQEFATKQSMFEQQLTEALAEKQSAELKRDNAIKLVESLNSMRKKTEQSIALLETDNELKQKQLQITLENFKKIEVEMNHKILRLKKYVSDKALFLKTFEFLDQEDLDNFLVESKSASQDVDGVVFREQLNGDYSKAISYIQSHLIEKDILYPRHIIENYLTLLRTKDLIILAGESGSGKTNLVKSFAKAVGGKAVIIPVKPNWTSSEDLLGYYNPLEKKYLATPFLDALLEAQLN…	CHU33_27250	gb|POP40439.1|	MTSTFEIKYIEIQWYDKDTVTKVTESLHAIPVEYNDEHSHFECETTIYPRTEGILRGQLAVRFIAGSAVIPCIKMSYGAEQQLFPVEDIDSGKTWWIVQDSWDAKEKYWRHSSVNTAGTLILALDDVHCHINIGSMDFSREQLERYLTGFKDDLWELILDESSSVQASREQGSIGINNATIDCAQNIIMHAHKILSNPKAELREIQTLKPRKAVKPVNRTFMELATKTNQSVLTSRAVTPTFNMAENRYILFALERSYRIIKQIVILSGNKAKRYAALIDKLQQQYDSITDSVTIDRDLVVKDLEIIRQRCKLSYWQQQLAQSIFSEKIVYDADGPQYNVLHFRSQKPTQENDGFFIEINVQGQWKKDNEKSTVLSFNSKVNASLLNLVRCLRQHAEYK…	Superficieibacter electus	Gammaproteobacteria
Gammaproteobacteria	Superficieibacter electus	PQGD01000050.1	CHU32_27295	gb|POP41080.1|	MSNKVYGYSELEGLSDTELLATLQSSWGYKDDNFEVWGEVTLFKDREWGHLKNPRMLASNNLLSYPLTGVNGPCEFWINPADAKKYGDQRGARFIKCKLTLSRPKEREKHRIPFMMSVLPGSCSSLEKLPASIPHDIVTADDVSYFIANEIYHFYQQQAATKIEQEFATKQSMFEQQLTEALAEKQSAELKRDNAIKLVESLNSMRKKTEQSIALLETDNELKQKQLQITLENFKKIEVEMNHKILRLKKYVSDKALFLKTFEFLDQEDLDNFLVESKSASQDVDGVVFREQLNGDYSKAISYIQSHLIEKDILYPRHIIENYLTLLRTKDLIILAGESGSGKTNLVKSFAKAVGGKAVIIPVKPNWTSSEDLLGYYNPLEKKYLATPFLDALLEAQLN…	CHU32_27290	gb|POP41079.1|	MTSTFEIKYIEIQWYDKDTVTKVTESLHAIPVEYNDEHSHFECETTIYPRTEGILRGQLAVRFIAGSAVIPCIKMSYGAEQQLFPVEDIDSGKTWWIVQDSWDAKEKYWRHSSVNTAGTLILALDDVHCHINIGSMDFSREQLERYLTGFKDDLWELILDESSSVQASREQGSIGINNATIDCAQNIIMHAHKILSNPKAELREIQTLKPRKAVKPVNRTFMELATKTNQSVLTSRAVTPTFNMAENRYILFALERSYRIIKQIVILSGNKAKRYAALIDKLQQQYDSITDSVTIDRDLVVKDLEIIRQRCKLSYWQQQLAQSIFSEKIVYDADGPQYNVLHFRSQKPTQENDGFFIEINVQGQWKKDNEKSTVLSFNSKVNASLLNLVRCLRQHAEYK…	Superficieibacter electus	Gammaproteobacteria
Gammaproteobacteria	Pseudomonas trivialis	PCOS01000008.1	CQ048_15680	gb|PQZ89931.1|	MQQDGVSAASGEGYAEELPSLGWSEEDLRYYLAQVWGQRDPLHLRVIGRLQLAEGKTFGFLVDLHHAETGIRLPPPLKNASVRQSVFVPPSELSRIQKLGRIESFASAELDLSPLDERKKRGDPFGCMVHPETLEPLSHIPESWWSIKNIQSEAMPLVVTKVREAIEDRLQRETSEAGDKLLAAQLALEVAAQNKKLLDDEYGRIGLEVDQRMDRIAALDTEFVQRKNTLETRFRELEAFLQDRSERMVALNLIDRADLEKVFPLIGAPDTREGHRLREALAGNLQRLASYIQAFLWRKGILYTRAQLLDFITLLRTNDLIVLAGDSGSGKTNLVKSVASAVGGRCTIVPVKPNWTGSDDLLGYYNPIERRYHPTQFLLALLDAAREPEIPHFICLDEM…	CQ048_15675	gb|PQZ89930.1|	MPPEIEARYLTIDWQSEGVARAIEVAPVSLEIEPRTDGEFVVESVIFNDFQPWLGIRVGPGFEDVMPVFVTALGQETPMLQVADPRGGGFWWLRNDGWDHAGKRHLSELQRSAGVYNIRIDDLTLRVENRLSTFGRADIQAYIDDFRGDLLWMIMNDSAGATATGKGAGAGTEFADALKELHTASHRVLASPAVNIREGQAQQPLAKLRPNTVTFREYARNPTARQLTGRVFNESADTAENRYLRHVLAVSLKVADAYVSAASLQSSFLDRLASQESERARRDREMEMRPVEPEVFDQQTEEIKRKLDALADFKSRSGHEADLVGRFPIRLGKRYFDHFAFYYTPQDAMASNVASPVDYRVVVLPKDLFELILGAHHFCKNFTLTGSVDSRVRDTSKGQ…	Pseudomonas trivialis	Gammaproteobacteria
Cyanobacteriota	Merismopedia glauca CCAP 1448/3	PVWJ01000139.1	C7B64_20615	gb|PSB01001.1|	MSLYNLSPELVAEQLGVNYHSLIELLQQLDEIYRDFVIPKKSGGVRTIKTPMSIREIIRGYEDGYFPLLDIQKKLSKEILQPVYQPKPCVHGFTAKKSIVTNAKAHTKKKYVLNLDIQDFFSSINFERVRKMFMAQPYNANDEVANLLAQICCYEDLLPQGAPTSPIVSNMVCAKMDSQLLTLAKKYKATYTRYADDITFSTNLDEFPEALGSVADEGGIRRFVVGEELREILNSNNFEVNERKVRLQTQNSRQEVTGLTVNRFPNVDRKFVRQIRSMLYAWQRFGIEQAAGEYSSRYDKKYKYLINRSGEEAKRFHHVLRGKIEFLGMVRGKNDPIYKKHLAQYKRLLYEELAQKPRLSSSLKTKGWQDRVSLNNQDWNTHIRVAGLLLPDYIKTSYL…	C7B64_20610	gb|PSB01000.1|	MAYPKIYFADSIGELPWEDHVQHTRQYSGRWYVQIEGLWDGSVGLKGDSIIPLLKISSNRWEIPQRTKHEREISKGVASRTGQITAILLDASGEPVDSSPEAFLLVKPAGLTEQELEQLITEIGLLALSTSSCVTSQLQVPVGENVETAMIGMGYSESRGLLLTATSLLKLASVVQSNWVLIEKRPLRSFSRELGLVDTRKLINSPQVLIKAKIDASKQRIMALTQVESTQCSENEFLCYVLDVYLKDLVNGIVNSLEHLEVNDSFSPLNYAKEPAILSFLARAKEQVQKFNQQREEDRKTISKIVAQLQECAEWATEARHSPILGNVLTPTEPPLPSQRLIGSPAYAPIFEEYMNCESSVFSKIQPVLTLFKATYQSQVRSTWELYEIWCFVRLYNAF…	Merismopedia glauca CCAP 1448/3	Cyanobacteriota
Cyanobacteriota	Chamaesiphon polymorphus CCALA 037	PVWO01000050.1	C7B77_06215	gb|PSB58050.1|	MGQPRGKREKGDRCNRTKKADPIAQDVRAVGEEEARNLENEIAILVSQEERRNWAEQCSIEKKELEIYKDKIEKENQIKQEQIMLNLSQEREDWIAEANFQKQEFELQKNWLEKEGERINHNRNSLEEKEKELIRIKKEINCYTSLLTLVEDRDRESDIEHSSIPKSTNLEPEDLGDRWIEMLESKNQILPESIAIGYLVSTITALCSGSMVLLNGTVGVGKSSMVRKSAKLLGGNSEIIPIRPSWLDPSDLLGFFDPLSETFRPSSFTTALKKAAKYPDRPFLICLDELNLARIENYGADLLSILEYSKDKAGAEDKKRTLSLYSEDIEIHLWDKLKLLRAEENLTIEQKLLIAQLDRTLSTMKSECEIPQNLILVGTLNSDETTYDLSPKVIDRSYV…	C7B77_06220	gb|PSB58051.1|	MSYPLLYFVDRQGTKLPEEDNYQYCRQYGGSWAVEIEGDWDAIVGLLGETEIFPLTKISSNRWIIPDKDPIGKEIATRAGFITAVMLDSNLAPIPSTPQAQLWVSPGGLSESNLNEIIAEIGLLALSVGSLVSHPASTHVGAQTGSDIGKLLLSGGQLLPTAQALLDLYRSVRNVWTEIEKRPLRSFKSEIVAVDINRKLNSPQALISRILHPSKKQIITPGSVESLNCSENQFLCYLLDVYLDNIASSFIKSIENSLRDDLFINEKFFPVENRADLKKIGSPRILG	Chamaesiphon polymorphus CCALA 037	Cyanobacteriota
Gammaproteobacteria	Klebsiella pneumoniae	QIVU01000054.1	DMQ95_26940	gb|PXH68408.1|	MALEQVIYNLEEVKGLSDEELYQRLYDSWGLENHKIDVWGELSINEAGNWAGIRNAKTLSGNQSIEYPLADSHELQSGVFLTPSVAKIVLGNDTKGMVACELMLASIPQRAKKNNPFLLAVNDKTVERLTYLPDALPNLDRQALIQNEDETLLRKVIYDAEVKRVKHKIASETEALEAALQEKQQDMTDKLAELSDAFKSTQDKITASTTELESSIKRNEELNNDNHRLNLKIQESKAELDVIIEKSRKVEESMARKVEKLTDFIKEKAIFLKSFEFLDEEDFDFFVGSPLSNKERGEHISFSQALYSNYSDAVSYIQAYLKERDILYPRHIIENFLTLIRTNDLIILAGDSGSGKTNLVQSFAKAIGGVSKIIPVKPNWTSSEDLLGYYNPLEKKYLA…	DMQ95_26935	gb|PXH68407.1|	MEAPFVIKFIETKWHDKQTLVSVSESEYLLKLEQTGNNAFSAHTTIYPKVDELRFAQLAIKTKQGDQSPPYIAMPNGERRQLESITDPASNEEWWVEPAHWDAKQRVWRSEARRTAGQIMFVIGSSTLKLDIDISEQTKSDLSRYLSDFKADLWELILDESSHITGDAKNSQVAAIDQEALSLVASILSNAQTILKKPKVELKEIQALKPAKEVRPVPRTFMEICTKGSRKHLTSRASEPSYNVPENQYVLYVVSSTLSIVKQLVKVAESKKSRFSGAIEKLNERLDSLKDYRIINRDLVVKDLERLKKRFDTEVINAELSEQLAKINVNLSRSYSEKGYLRLEKATGSENEWWAKIKPSQNDDWQQFEPDGYTIFSSRDHYASLFKSYSDYEIEAKIP…	Klebsiella pneumoniae	Gammaproteobacteria
Gammaproteobacteria	Klebsiella pneumoniae	CP043934.1	F2X40_28025	gb|QER51364.1|	MALEQVIYNLEEVKGLSDEELYQRLYDSWGLENHKIDVWGELSINEAGNWAGIRNAKTLSGNQSIEYPLADSHELQSGVFLTPSVAKIVLGNDTKGMVACELMLASIPQRAKKNNPFLLAVNDKTVERLTYLPDALPNLDRQALIQNEDETLLRKVIYDAEVKRVKHKIASETEALEAALQEKQQDMTDKLAELSDAFKSTQDKITASTTELESSIKRNEELNNDNHRLNLKIQESKAELDVIIEKSRKVEENMARKVEKLTDFIKEKAIFLKSFEFLDEEDFDFFVGSPLSNKERGEHISFSQALYSNYSDAVSYIQAYLKERDILYPRHIIENFLTLIRTNDLIILAGDSGSGKTNLVQSFAKAIGGVSKIIPVKPNWTSSEDLLGYYNPLEKKYLA…	F2X40_28020	gb|QER51363.1|	MEAPFVIKFIETKWHDKQTLVSVSESEYSLKLEQTGNNAFSAHTTIYPKVDELRFAQLAIKTKQGDQSPPYIAMPNGERRQLESITDPASNEEWWVEPAHWDAKQRVWRSEARRTAGQIMFVIGSSTLKLDIDISEQTKSDLSRYLSDFKADLWELILDESSHITGDAKNSQVAAIDQEALSLVASILSNAQTILKKPKVELKEIQALKPAKEVRPVPRTFMEICTKGSRKHLTSRASEPSYNVPENQYVLYVVSSTLSIVKQLVKVAESKKSRFSGAIEKLNERLDSLKDYRIINRDLVVKDLERLKKRFDTEVINAELSEQLAKINVNLSRSYSEKGYLRLEKATGSENEWWAKIKPSQNDDWQQFEPDGYTIFSSRDHYASLFKSYSDYEIEAKIP…	Klebsiella pneumoniae	Gammaproteobacteria
Gammaproteobacteria	Klebsiella pneumoniae	CP050830.1	HC709_27210	gb|QIV12998.1|	MALEQVIYNLEEVKGLSDEELYQRLYDSWGLENHKIDVWGELSINEAGNWAGIRNAKTLSGNQSIEYPLADSHELQSGVFLTPSVAKIVLGNDTKGMVACELMLASIPQRAKKNNPFLLAVNDKTVERLTYLPDALPNLDRQALIQNEDETLLRKVIYDAEVKRVKHKIASETEALEAALQEKQQDMTDKLAELSDAFKSTQDKITASTTELESSIKRNEELNNDNHRLNLKIQESKAELDVIIEKSRKVEESMARKVEKLTDFIKEKAIFLKSFEFLDEEDFDFFVGSPLSNKERGEHISFSQALYSNYSDAVSYIQAYLKERDILYPRHIIENFLTLIRTNDLIILAGDSGSGKTNLVQSFAKAIGGVSKIIPVKPNWTSSEDLLGYYNPLEKKYLA…	HC709_27205	gb|QIV12997.1|	MEAPFVIKFIETKWHDKQTLVSVSESEYSLKLEQTGNNAFSAHTTIYPKVDELRFAQLAIKTKQGDQSPPYIAMPNGERRQLESITDPASNEEWWVEPAHWDAKQRVWRSEARRTAGQIMFVIGSSTLKLDIDISEQTKSDLSRYLSDFKADLWELILDESSHITGDAKNSQVAAIDQEALSLVASILSNAQTILKKPKVELKEIQALKPAKEVRPVPRTFMEICTKGSRKHLTSRASEPSYNVPENQYVLYVVSSTLSIVKQLVKVAESKKSRFSGAIEKLNERLDSLKDYRIINRDLVVKDLERLKKRFDTEVINAELSEQLAKINVNLSRSYSEKGYLRLEKATGSENEWWAKIKPSQNDDWQQFEPDGYTIFSSRDHYASLFKSYSDYEIEAKIP…	Klebsiella pneumoniae	Gammaproteobacteria
Cyanobacteriota	Dolichospermum flos-aquae CCAP 1403/13F	CP051206.1	HGD76_05200	gb|QJB43707.1|	MNLKDLYCLSPELVAEKLGVNYHSLIELLEQVDEIYREFKIPKKSGDVRTIRTPISSSERYKIYEGEGYFPLLDIQKKLSKEILQPVYQPKPCVHGFTAKKSIVTNAKAHTKKKYVLNLDIQDFFASINFERVRAMFMAQPYNANDKVANLLAKICCYKDQLPQGAPTSPIVSNMVCAKMDRQLLELAKKHKATYTRYADDVTFSTNLEEFPEALGYVINDGSVRKFVVGEELREIINSNNFEVNERKVRLQTQNYRQEVTGLTVNHRPNVNRKFVRQIRALLHAWQKFGIEKAADEYSSRYDKKYKYLKIRSSENTKRFHHVVRGKIEFLGMVRGKNDPIYKKYLSQYKRLIYEELAQEPKLSFVLKTKGGKERVSLNYQDWNANIRARGLLLPNYIK…	HGD76_05195	gb|QJB43706.1|	MAYPKIYFADSRGELPWEDDVQYTRQYSGRWYVQIEGLWDGSIGLKSDSIIPLLKIGSNRWQLPQRTKHEEEISKGVASRTGQITAILLDASGEPVNSSPEAFLLVKPAGLTEQELEQLITEIGLLALSASSCVTSQLQVPVGEDVETTMTGMGFSDSRGLLLTATSLLKLASVVQGNWVVIEKRPLRSFSRELGLVDTRKLINSPQLLIKAKIDPSKQRMMALTQFESTQCSENEFLCYILDVYLKDLVNGIANSLEKLEIDDSFSPPIYAKDSKILSFLTRAKEQVQKFNQERGKERKTISKIVAQLRDCAEWATNARHSQLLNKLLTPNEPSLPSQRLIGSPAYASIFEEYMNFESSIFPKIQPVIKLFKATYQGQVRSTWELYEIWCFVRLYNAF…	Dolichospermum flos-aquae CCAP 1403/13F	Cyanobacteriota
Bacillota	Bacillus cereus	CP053290.1	HLB41_27685	gb|QJU37528.1|	MVQSIAKDSFTKEEVQNYEDALNSLKYFLLEDNDEIKVEHVDTVYEFLSHSTNTKRQDKQLFAHYLQDIPPGEVKKMKMVLKKLKKGIKENTQGPVEESKKKLIEYGVLNFCSAFLTKPLLHEEKEMIAITENSLKDSEMKTIINQTQLHNKEPKRYDEWLSTEAAQVVTELRTADENNELSALHVNKFVKLFKKYSQGRLLFHINGYIQTEETVRIYGTPMEWTNEGIVPLNHPWKIEEWSISRNNIKAHRVAHLKQNDLVLVNFSGTQNTHFLASLLFIDFTTAEVVPLSLEQSLQEIGGTAFVKQLKDNMSVNTSEEIEAIIIQRLLNVNQELKNQLEKEQQEFVLQQQKLSEEQQMWRRIFYKIEQAIAFEQKEAKVDEVQIHPYKEETFCKQVQ…	HLB41_27690	gb|QJU37529.1|	MKIIHIVLKDREIQAYDELTKSEGIFLASEYTKKDKMTAQIGVIEPAASKVLIEQFKQPVATLTKDNKTNIWYHKPSKWLADGFEQSTDSIFGINAGGSFDIVAYDVDNLELARAQVNITPGTISIKEYAFMQQEVRRLFELFSYDLARESIDNKNILKQTQTKLFNVYKLEEILNEFSDWFLQLVQEPAEQLIHTTKKVALIQLKKWTPKVILEQTLRPDHKVRANVIEKSTAIAEHGMLRLMLEQIKQRIDCESQAEEILINELTDEIVQLSQVIKDKTNHLQEAILALQQVVKQDLITLKARKSIWFQLNSDVQKWLDEPLMDVSPVEIEETHVFSMNPVYSAVYDSYLKFNELQPKLFEAIRPFIQSILKSPTLYEIWIFLKITQQLHQWGVNTD…	Bacillus cereus	Bacillota
Bacillota	Geobacillus sp. 46C-IIa	CP061474.1	IC803_00330	gb|QNU28080.1|	MITDERQGLQHQLEVILHELDNPVNWTQEQANSFYEGFCRSRKGLGDRLILKITRIIPIKGGKLLIGVVLNPDTFLPFTLPFNNEKWNVSFALNGEAEQVKEGEIVVTVPMALDIEALQGRNDRERRMRSMVSVKRNSVKQAPSQTQLLEIFGHRLERKLGHRIVEKLSEQLGSLEELSNFVLEEFIQIYEDHIQCQNEELDRQEQELEKKKQHLDQRQSQLEEKESSLNERERQLNEKEQQLDEYESRLHSQFERLRLLPPRSLSERLAEEEESGSELIPWNGQGDIIDVIRGALHTQCDLQYERDVIECFVGALKTNQLIILHGPSGTGKSSLVRGFANIIKGAKSYTIRVQPSWTDKQDIVGFLNPIDYQYISTEFLDALVEARANPTSLYLICLD…	IC803_00335	gb|QNU28081.1|	MELWIAKVKPDAEHPIQKLEKLLIFDRDHQCYMVTEYEGGVVVKVPNKKVRKVFLSHYGMLDDEERIPLVYDKQWDVWYDQGDESNERAPVGLNQCGTFFFEGEDENGYIIERSGDVYITSSLLTKEEFQQMKDEICSVLEDFLVVYQGPVSPIKRWTKRVETAQNVWERMKKLSVVLIEIAKVPHEKLSQERQLTPVQKIKRLDAQVLINRRLFPFKNQLLAPVNVRSIDIPEHRMIRWGLERIIDQAERHIRQMKNEREVLNRRRQLLKQERQGLRGLNLFDRQKTESSIHKNLGDLSEVEQHLEENERYWDEIRKMANECLQLPYLDVGEEEMEQTHLFIFSPLYREAYQYLDGILNDQPSELSIKQLSHVYVPLQKSPNLYETWCLLSIVHSLIY…	Geobacillus sp. 46C-IIa	Bacillota
Gammaproteobacteria	Klebsiella pneumoniae	CP061360.1	IC568_27490	gb|QOC53783.1|	MALEQVIYNLEEVKGLSDEELYQRLYDSWGLENHKIDVWGELSINEAGNWAGIRNAKTLSGNQSIEYPLADSHELQSGVFLTPSVAKIVLGNDTKGMVACELMLASIPQRAKKNNPFLLAVNDKTVERLTYLPDALPNLDRQALIQNEDETLLRKVIYDAEVKRVKHKIASETEALEAALQEKQQDMTDKLAELSDAFKSTQDKITASTTELESSIKRNEELNNDNHRLNLKIQESKSELDVIIEKSRKVEESMARKVEKLTDFIKEKAIFLKSFEFLDEEDFDFFVGSPLSNKERGEHISFSQALYSNYSDAVSYIQAYLKERDILYPRHIIENFLTLIRTNDLIILAGDSGSGKTNLVQSFAKAIGGVSKIIPVKPNWTSSEDLLGYYNPLEKKYLA…	IC568_27495	gb|QOC53784.1|	MEAPFVIKFIETKWHDKQTLVSVSESEYSLKLEQTGNNAFSAHTTIYPKVDELRFAQLAIKTKQGDQSPPYIAMPNGERRQLESITDPASNEEWWVEPAHWDAKQRVWRSEARRTAGQIMFVIGSSTLKLDIDISEQTKSDLSRYLSDFKADLWELILDESSHITGDAKNSQVAAIDQEALSLVASILSNAQTILKKPKVELKEIQALKPAKEVRPVPRTFMEICTKGSRKHLTSRASEPSYNVPENQYVLYVVSSTLSIVKQLVKVAESKKSRFSGAIEKLNERLDSLKDYRIINRDLVVKDLERLKKRFDTEVINAELSEQLAKINVNLSRSYSEKGYLRLEKATDSENEWWAKIKPSQNDDWQQFEPDGYTIFSSRDHYASLFKSYSDYEIEAKIP…	Klebsiella pneumoniae	Gammaproteobacteria
Gammaproteobacteria	Klebsiella quasipneumoniae	CP068446.1	IT777_26880	gb|QQX99081.1|	MALEQVIYNLEEVKGFSDEELYQRLCESWGITNGKLAVWGKILNGPDSDSRKLPTRLLEIKSLQTGLDTEYPINVRLTMDKGVFVSFKSVEELFGLEDGSFVSCELALAPQSEREKHENPFECNVVVSSVRRLIKLPEYTANDIIKGDENIFLDEAVYKQHLQNVQSRIDSEVTALNAEFEREESSLKAQISSYKDQLQHVQDDLNQKNNVLSQAIAKAQKLEVEHSEWQHKIALQKKAEETMSKKIERLKAYVESKAGFLKSFEFLDDDDFDLFVGSTLSNKDRDEHISFSQAFDSNYSDAVSYIQAHLKERDILYPRHIIENFLTLIRTHDLIILAGDSGSGKTNLVQSFAKAIGGVSKIIPVKPNWTSSEDLLGYYNPLEKKYLVTPFLEALIEAK…	IT777_26875	gb|QQX99080.1|	MEAPFVIKFIETKWHDKQTLVSVSESEYSLKLEQTGNNAFSAHTTIYPKVDELRFAQLAIKTKQGDQSPPYIVMPNGDRKQLESITDPASNAVWWVEPAHWDAKQRVWRSEARRTAGQITLVIGNSTLKLDIDISEQTKSDLSRYLSDFKADLWELILDENSHITGDAKNSQVAAIGQEALSLVASILSNAQTILKKPKVELKEIQALKPAKEVRPVPRTFMEICTKGSRKHLTSRASEPSYNVPENQYVLYVVSSTLSIVKQLVKVAESKKSRFSGAIEKLNERLDSLKDYRIINRDLVVKDLERLKKRFDTEVINAELSEQLAKINVNLSRSYSEKGYLRLEKATGSENEWWAKIKLSQNDDWQQFEPDGYTIFNSRDHYASLFKAYSDYEIEAKIP…	Klebsiella quasipneumoniae	Gammaproteobacteria
Gammaproteobacteria	Klebsiella pneumoniae	CP069846.1	I6K35_01300	gb|QRR62540.1|	MALEQVIYNLEEVKGLSDEELYQRLYDSWGLENHKIDVWGELSINEAGNWAGIRNAKTLSGNQSIEYPLADSHELQSGVFLTPSVAKIVLGNDTKGMVACELMLASIPQRAKKNNPFLLAVNDKTVERLTYLPDALPNLDRQALIQNEDETLLRKVIYDAEVKRVKHKIASETEALEAALQEKQQDMTDKLAELSDAFKSTQDKITASTTELESSIKRNEELNNDNHRLNLKIQESKSELDVIIEKSRKVEESMARKVEKLTDFIKEKAIFLKSFEFLDEEDFDFFVGSPLSNKERGEHISFSQALYSNYSDAVSYIQAYLKERDILYPRHIIENFLTLIRTNDLIILAGDSGSGKTNLVQSFAKAIGGVSKIIPVKPNWTSSEDLLGYYNPLEKKYLA…	I6K35_01305	gb|QRR62541.1|	MEAPFVIKFIETKWHDKQTLVSVSESEYSLKLEQTGNNAFSAHTTIYPKVDELRFAQLAIKTKQGDQSPPYIAMPNGERRQLESITDPASNEEWWVEPAHWDAKQRVWRSEARRTAGQIMFVIGSSTLKLDIDISEQTKSDLSRYLSDFKADLWELILDESSHITGDAKNSQVAAIDQEALSLVASILSNAQTILKKPKVELKEIQALKPAKEVRPVPRTFMEICTKGSRKHLTSRASEPSYNVPENQYVLYVVSSTLSIVKQLVKVAESKKSRFSGAIEKLNERLDSLKDYRIINRDLVVKDLERLKKRFDTEVINAELSEQLAKINVNLSRSYSEKGYLRLEKATGSENEWWAKIKPSQNDDWQQFEPDGYTIFSSRDHYASLFKSYSDYEIEAKIP…	Klebsiella pneumoniae	Gammaproteobacteria
Bacillota	Parageobacillus toebii	CP070511.1	JTI59_11375	gb|QSB47765.1|	MNIETAQTLIDISTYINDKNPQERLSYICDVLGLRENYLLGKVLESRHNRNFFLIGDLVNPYNGRRIFERVIKDANFIQNVICPGATIEDLGLEAGQLVLFRFQTDESDFDKVSQGKLLRTNKDNIINVRDVSDVLNKLGIEPEDLHINVLINNKTDDFLIFPLTEFYQDIIYKKVQEHLEQINLEHANLEMKKQEIYNEQKNLSEKQKELSILEIEIDKKLLKLKELGFNLLIESKPIKRINEESTLLEEPESEKELIEVIQQQIALRDLDYEKDTIRRFYCALKTNQFVILSGPSGTGKTSLVSAFAEVVSAKAKIIPVQPSWTDKQDLLGFYNPLRKQYVPSIFLDTLIEANHDPDTLYLICLDELNLAQIEYYLADILSIREQKNAPIELYSKYE…	JTI59_11380	gb|QSB47766.1|	MSLRIQPYMIYVHYDYDAILSTDKTLPILEVQLGEKVKYDYERGCWYTYNYFRGNITDENGKIRKRKLQIGIMIEGEDLEGVEVYFVSTDGANKRKLYCDTKKKLWFELSRFIKKKGRYCYDEGDWVTGVVYSGTINIVVERNEKVELTEKLAFFPSGIPLEDYEAMISDLFRIRESLVRRKQTNISVNTKEVRTPERLLQIVKGLETPIRIISTTPAGELSFRWEKRKVSNVGKFYPRTELEREINPGKDKYKTFVTYENHTIYENKIIKQELQRLKEYCRFYKSTSPLVKADQRQKVNELRSLYDKSSASVKRLVEIKDSLELSHLDNYERAIETVKKEIDRMVDKRRKLKEDLIQRLKRHNPVVEIHDRTVPINIICLIHPGNYSYIKRTCFNDNQ…	Parageobacillus toebii	Bacillota
Cyanobacteriota	Dolichospermum sp. UKL201	CP050891.1	HEP80_18405	gb|QSV55552.1|	MNLNDLYHLHPELVAEKLGVDYHSLIELLKQVDEIYREFKIPKKSGDVRTIRTPVSSSELYNCSLLDIQKKLSKEILQPVYQPKPCVHGFTAKKSIVTNAKAHTKKKYVLNLDIQDFFASINFERVRAMFMAQPYNANDKVANLLAQICCYKDQLPQGAPTSPIVSNMVCAKMDRQLLELAKKHKATYTRYADDVTFSTNLEEFPEALGYVLNDGYVRRFVVGQELREILNSNNFEVNERKVRLQTQNYRQEVTGLTVNHLPNVNRKFVRQIRALLHAWQKFGIERAADEYNSRYDKKYKYLKIRSSEKTKRFHHVVRGKIEFLSMVRGKNDPIYKKYLSQYKRLIYEELAQEPKLSFVLKTKGAKKRVSLNYQDWNANISEKGLLLPNYIKTSYLLSV…	HEP80_18410	gb|QSV55553.1|	MAYPKIYFADSRGELPWEDDVQYTRQYSGRWYVQIEGLWDGSIGLKSDSIIPLLKIGSNRWQLPQRTKHEREISKGVASRTGQITAILLDASGEPVNSSPEAFLLVKPAGLTEQELEQLITEIGLLALSASSCVTSQLQVPVGENVETTMTGMGFSDSRGLLLTATSLLKLASVVQGNWVVIQKRPLRSFSRELGLVDTRKLINSPQLLIKAKIDPSKQRMMALTQFESTQCSENEFLCYILDVYLKDLVNGIANSLEKLEIDDSFSPPSYPKDSKILSFLTRAKEQVQKFNQERGKERKIISKIVAQLRECAEWATNARHSLLLNKLLTPNEPSLPSQRLIGSPAYASIFEEYMNFESSIFPKIQPVIKLFKATYQGQVRSTWELYEIWCFVRLYNAF…	Dolichospermum sp. UKL201	Cyanobacteriota
Cyanobacteriota	Aphanizomenon flos-aquae KM1D3_PB	CP051528.1	HEQ20_13795	gb|QSV71620.1|	MTENDEQEFNKLLAKPDSELIKDILVYNQIPSLVLSGVLTVNPGSRYGYFKSVLDHNGRKIKYPNGNDLDDIFIYDPYELEKDERYYFECELASLNEKRKRNNPYLLKTTVDRVQQGEKLNSLVKAIEEKNYEINELNEAIKYCEETIAQKITEISKNESFISELSEKIESNKIQLDQIINQKTEMENTIKILQQKINICRKLEFLSEDEERQYISLSREKYVIPSNYLSFENELESSFAKLADHVHQYLFCEKNLIYTRFQIRNFLTLLRTNDLIVLSGLSGSGKTQIVKAFAEALGGVAKIIPVKPNWTSSDDLLGYYNPIQMSFLPTPFTEAIVEAIHNPDQLYLICLDEMNLARVEYYFADFLSKLEERSSQPEIELYAKHEEELFISEFKTLLN…	HEQ20_13790	gb|QSV71619.1|	MKPTIKAGNINTYEYDIVLYTKEDGKYFQFCVKTPHTPFLKGSDGKYHDPLFNLKDDLWIIKGEEWEIGQRGIGYHHCPSINTIGKIEIGILDNLKQIKDFISIDINSNILDFDFEQLKNDFEGELWNLITSQKSKITSSRLELRYYDKIFCYSESKSIIDFLKAYDAIEKKPKSELLTSKGIAKIEKVKPIAETYRKLVSIGGSARVLPSKTFIENYDIYENRYLCLMLNSIYKIVSKNVHFSGRQKQKLMSDIESREETILKLKEPFIKVDADLLLSEISEKESDFQIWRQNWEINRNIFLSKYKGVGDNFYYAKIKVESKSVFGGKISWWVNCCWQKNDLIHIQEEFCVFEFHEDTNSILEEGKWMEIEIYVAYEKRILNIRGKERNKYIITNVKA…	Aphanizomenon flos-aquae KM1D3_PB	Cyanobacteriota
Cyanobacteriota	Dolichospermum sp. DET69	CP070233.1	EZY12_11485	gb|QSX70130.1|	MTENDEQELNKLLAKPDSELIKDILEYNQISSFVLSGVLTVSLRNESLGYFKSVLDHNGREIKYPNGDDLDDIFIYDPYELEKGERYYFECELASLNEKKKRNNPYLLKTTVDRVQQGEKLNSLVKAIKEKNDQINELNEIIKDYEETITQKITEISKNDGFISELSEKIESNKIQLDQIINQKTEMENTIKILQQKINICRNLEFLSEDEERQYISLSREKYVIPNNYLSFDNELENNFSQLADHVHQYLFHQKNLIYTRFQIRNFLTLLRTNDLIVLSGLSGSGKTQIVKAFAEALGGVAKIIPVKPNWTSSDDLLGYYNPIQMSFLPTPFTEAIVEAIHNPDQLYLICLDEMNLARVEYYFADFLSKLEERSNQPEIELYAKHEEELFISEFKTLL…	EZY12_11490	gb|QSX70131.1|	MMKDFEVLMISVEWESRDKYLSITKSARPLKPTIKPGNINTYEYDIVLYTKEDGKYFQFCVKTPHTPFLKGSDGKYHDSLFKLKDDLWIIKKEEWEIGQRGIGYHHCPSINTIGKIEISILNNFISIDINSNILDFDFEQLKNDFEGELWNLITSKKSKITSSRSELRYHDKIFRYSESKSIIDFLKAYDAIEKKPKSELLTSKGIAKIEKVKPIAETYRKLVSVSGSSRILPSKTFIENYNIYENRYLCLMLNSIYEIVSKNVNFSDRQKQKLMFDIERREETILKLKEPFIKVDADLLLSEMSEKESDFQIWMQNWEINRNIFLSKYKGVGDNFYYAKIQVVSKSVFRGNISWWVNCCWQKDDLIHIQEEFCVFEFHEDTNSILEEGKLMEIEIYFA…	Dolichospermum sp. DET69	Cyanobacteriota
Gammaproteobacteria	Thiothrix unzii	CP072793.1	J9260_04410	gb|QTR54344.1|	MNATETIYHVDEIKNLSDRELYQRLYESWNITNGEIKIWGRLKLRNDGRWASIEEVRTTTENREINYPLDEYIKLDPYIYVEYAKQILGDNQSIFIKCSLSLSPERERIRHNNPFQMAVKIGSVEILESIPINKNDILESDCESYIAKAIYNFELSKLTKDIVKKEIALQESLKSLEAKKTQEDIEINKLAKQKSILEENSSQLKSDIDIQNKKLITAIDQHEKEIQKMSKKIEKLKSYIAEKAIFLKKFEFIDDDDFDEISINIVPEFNKIETLSFSSDFNLDYKQAVFYIQSYLKNMDILYPRHIIENYLTLIRTNDLIILAGDSGSGKTNLVQSFAKAVGGVAKIIPVKPNWTSSEDLLGYYNPLEKKYLATPFLEALIEAQNNPDIPYFICLDEM…	J9260_04415	gb|QTR54345.1|	MQAIFEMKYLDVSWYNEDTILSIKESSSSLNVEFDDELQHFLCYTEIYPKADGIRLGQLAFRYLKNNLIAPYIKGADDTKIPLKKITDKDTGKEWWIEANFWIAKDKRWESKTYRTAGKITVVLQSQICQVNIGSSEFTAKQLNRYLSDFKSDLWELILDEHSYVTGKAKITQSGGINEETIHLINHIISHTQQILKNPKSELRENQELKPRKMVKPVSRTFMEIATKGDSNFLTSRATNPIFNVPENRYILFALERIYRIVRQLVAISQNKKNRFELAIEKLNERYHSFGNTKPIDKNLVRKDLEAIKKLYNIEHVNNTLKGELKNLINDKDQFTELNKWYLKITGKTSDGKSYFVGVKRQLNDVWFERVAGERNVFLNLGNEHYQNLLEEGFEYKTD…	Thiothrix unzii	Gammaproteobacteria
Gammaproteobacteria	Thiothrix fructosivorans	CP072748.1	J1836_019465	gb|QTX10711.1|	MNATETIYHVDEIKNLPDRELYQRLYESWNIINGEIKIWGRLKLRNDGRWASIEEVRTTTENREINYPLDEYIKLDPYIYVEYAKQILGDNQSIFIKCNLSLSPERERIRHNNPFQMAVKIGSVEILESIPINKNDILESDCESYIAKAIYNFELSKLTKDIIKKESALQESLKSLEAKKTQEGIEINKLAKQKSILEENSSQLKSDIDIQSKKLITAIDQHEKEMQKMSKKIEKLKSYIAEKAIFLKKFEFIDDDDFDKISISIASEFNNIETLSFSSDFNLDYKQAVSYIQSYLKNMDILYPRHIIENYLTLIRTNDLIILAGDSGSGKTNLVQSFAKAVGGVAKIIPVKPNWTSSEDLLGYYNPLEKKYLATPFLEALIEAQNNPDIPYFICLDEM…	J1836_019470	gb|QTX10712.1|	MQAIFEITYLDVSWYNEDTILSIKESSSLLNVEFDDKLQQFLCYTVIYPKADGIRHGQLAFRYLKNNLFSPYIKGADGTKIPLKKITDKDTGKEWWIEANFWIAKDKRWESKTYRTAGKLTVVLQNQICQVNIGSSEFTAKQLNRYLSDFKSDLWELILDEHSYVTGKAKTTQSGGINEETIHLISHIISHSQQILKNPKSELRENQELKPRKTVKPISRTFMEIATKGDSNLLTSRATNPVYNVPENRYILFALERIYKIVRQLLVISQSKKNRFESAIEKLNERYYSFGNTRQIDKNLVRKDLEAIKKSYNIEHINNALNKKLKNLINDKDQFTELNKWYLQITGKTSDGKSYFVGVKRQLNDVWFERVAGERNVFLNLGNEHYQNLLEEGFEYKTD…	Thiothrix fructosivorans	Gammaproteobacteria
Bacillota	Bacillus mycoides	CP036030.1	EXW38_28960	gb|QWH15276.1|	MIVMKQTTKASTMSQQQDLTKNKVKEIIEGMKREGTLGNEVVIRIEEVHKNTVSDGWRYLCYVLDPNDKFNEMKHPLNNYSWNIVFVWKEGAFKEGDVLIGQYKFEQNRKHMGQLIQIDPTTLKHMPRLSTLIDRHGDNFVNHLQDAFGGEEKIIGLIYERWLETVEIDMKEWEEKKESVLTELGTLNSEFKEKEEECSGLKNQTTELEQKKKQLENQIHQLKVVFGFEEGTDSEQNWNDETGTYVFTEEEDFYKVLQRALYYYNDENLIYEYDVVKRFFTALQTDQLVLLTGPSGTGKSSLVNQVGQVMQNFKVHHVAVQSSWTDVQDLLGFFNPMKKCYLPTPFLEAIVEARNQEDVIHIICLDEMNLAHVEYYFSSFLSVREKHPNERYIDLYSER…	EXW38_28965	gb|QWH15277.1|	MMDMKPIWIKVSWNQPPLFFQDEIFTCNPVEVQAVEELGVQDGVFIATEYTRTANGFLTIGIKTDKSLKRAFAQGKFLYERELVYVSNGIWISCPQYMWSEQFKEYQIISSPIGLNQCGTIQFTGETVTGERIITNDVKIRPSLVTEVEYIQMEQDLMTITEELLFHAQAGLGNTGKIKLLIDLETLDNQVKQLNEVIRQLEEAPAEKLSSERVRVNVDKLKKFDVRVLLEQEMYPFKQTVKALTTIRSKDIQEHRKIKGAILDFIETCERQSRSEQMMKADLERQLHDVEEFGQKVLGTREAHFQEKFNSKKEWFRLHSEYFTAREKVWAKITLHLENLSHSYLLQDCEEEEWGDTHIFSFHPVYGEAFETIEQLRKQLRLQEPLKAFQHDLIQSPDL…	Bacillus mycoides	Bacillota
Bacillota	Bacillus mycoides	CP036064.1	EXW39_16650	gb|QWH61696.1|	MLLYIMYFSLLGVLSVIEAITKEKYAEFSPNERQAYVLERLHLEDLWLIGRVRNMKEEKPFFFIDQLQNPYTGVVIEAQVFTDLSRSLSIFCPAGSGEIYYEDGTLVIAKVKLTGVKKDILKGNLFNTTFNEVYPIEDSNELFNLLDMKKEDLRIIALAKPSLYEDGESRFVDVAADIVKAKIADDLKEIDAKNERNEARLLEVQKAEGHLEEAKQQFAIERKHLYSLQQKLEELGFVFNEQADEQLIKSDESFLETPETPLELLKGMQAQLSARGYHYEEKTLGQLLLALMTEQMIILSGPSGTGKTTIVKQFASIVNAKCEIIPVQPSWTDKQDLLGFYNPIRQLYVPSAFLDCLIEAKQNEEQLYIICLDEMNLAQIEYYLADLLSVRELEGGQLR…	EXW39_16645	gb|QWH61695.1|	MHVELYMIFVQYDHSVAPQQGLLPISSINIGDKIAPENDQEWVIPNHYRNQNESIMRQIGIRFVDKGRHVKAVSITSPDEMFSNSYVYHSEENIWFEPTRFSTKKRKHYYLYETDSILTGITNAGTAKLSCDEDGQSRYFATIHFVPSSLSIEDYEDMIVDLYRIHEDFVRDDRNVAKVAIKSNKVVMELQEQLRKLTSAIKQINVSPHATLKLYTTKKKPQNSGRFDLRMEIEQYINPGKPNYRSRELKPVVATFENKLIKQMLEDLIHYATVKGSDQTMTKVLLRNVLNEREAHFRKSDLEIQRLLGSVEMVEDLNTYNRVHSKLMRDIQPYLEEERQIREDVKAKANFISSPNGQIPSTYVELTLAMNGLFTESNSYYHHQSDEGMTAQLKYDRRE…	Bacillus mycoides	Bacillota
Gammaproteobacteria	Aeromonas sp. FDAARGOS 1418	CP077387.1	I6L48_10950	gb|QXB97577.1|	MRVQNRGADVAPNELHETSIEAAAQERALLDELRAAWRIAPDAPIVVIGQLQSKKVTDERLLYFLEGLEHPETGVGLLYPGLDSVAASAFVPPPEAGRFNVSRQPWMIAELQLSPVEHRNKHKNPYGCVVRRGSLRPLHDIPTGWGVTVSGRDSVRRISEAAFVAIQTQQQELLAHSEAKLAEIKNQNAVELSRQTDELSRLEDSKNSLRQAIEEMRRSAHAESVHAAERKERITNEIHAMKDRLNRLSDLIADKGRRLVALGILDEVDLLALLPPGDTKNEQPSHDFQELLGADFARLAPFVQARLWQTGMLFTQAQLRDFLALLRTHDVIVLAGDSGAGKTSLVRTVAESISGRCTVIPVKPNWTGPEDLLGYYNPIERSYQPTPFLLALQAAQAEP…	I6L48_10945	gb|QXB97576.1|	MRPEIEAHYLGVEWLDRGRARRVEVSPDPLDVVLGLDDVLRVETQIFHDFHPWLGLRLSGRLYQSKPVFVDAQSQEHSMLAVEDGAGSVWWVQDDGWDVVQQRHLSELHRTMGRFEVRIDDQRLLIENLTTGLGRAQLDEYLQDFKNDLIWLVLGSGTATTAGASDVFGDELPAALSDFASAAARVSAHPARALREILVETSRSRLRPNTASFRQHARHPSRPRLVGRASEETAETADNRYLRHMVQVCDRIALSADQAAQQQAARLAERARFEEERGVAYETTHSRQVNPEVFDRQLAELTEKLDRLAAWSDIDPDEQSGDFQDYRIEISKRYGVRDDEFFYEKPKGRSAYDDKMGVHYNVVRLPEALGNLVVAAQNFCKLYTLTGRPSIALKQNAKG…	Aeromonas sp. FDAARGOS 1418	Gammaproteobacteria
Gammaproteobacteria	Acinetobacter junii	CP078018.1	EGT69_008140	gb|QXR26316.1|	MENQITYTLQQLKNLNDDQIFLELKKIWGYKENESLRVIGQINRKSNFSQIYTLSNLKDSKGNSLLYPLENFKEDHGCFIGLSLPNTVEIGQWVQATLKLAPKKEREKHSNPFELNVQISSLKKLVEIPSKVIEDGIHDDLIENWVIEYFAEKNAEEITEKNKSVLMQHEILLKKEEELEKNLKSLEKKEISFLDKLAKNQEKIELCKLELEENKELVNAEKVELKKNKDLIIQAQAELISLKHQKEEILNKLNNFIEEKVNILRELEIIDEDSLHKLIGKNNTPVQLETHYLLGKDIKDIEEVIKHIQAYLYNKGTMYRRNILENFYTLLSTRDLIILAGDSGAGKTNLVKSFAEATGGKHYIIPVKPNWTSSEDLLGYYNPVEQNYLSTPFLTALID…	EGT69_008135	gb|QXR26315.1|	MLISARYIDVEWNATKQVKKVFYGSPIEIIKKSENNFFIETITFPKRFFYFAFRIEEPISNPPYFLFNEIKEDLLEIIDPKTGENWWIAKGRWISESKKRNYGNKYVHESFRTAGRLELHINDITIEISNRTNNFSVEEMEFFLTDFKNELWSIILNSESVVNAELQKSTPNIFNEDTILYVENCLNSVQKILNDPKFFLVENQQLVIKKKVKPVRRTFRELTTKPNSKTFTSRIHDKSYNNSENRYIHFCTEKLFFIFNKMLQVVERSNIQFSNMAKIYFEESDRLKNSDFKIIDKDLFIQEAYEIKQRSLNFYTELEKLNNNLLPSFLDEILKLNSKILNRNESGNEKLITYRFTLDQIFEYLDHSIQSRFLNGKEFETHPEYHIYNGKYLVVEFPD…	Acinetobacter junii	Gammaproteobacteria
Bacillota	Anoxybacillus vitaminiphilus	QLMH01000004.1	B0I26_10420	gb|RAK20369.1|	MAGKQTKQLQQLLNTILNELGAPINWTQEKADQFYKEFCQSPEGLNNRLILKITDVINIQNEKKLFFGEVLNPDILSPFTLPFEDEEWNASFVLVNNTKSFEKGDIVIATPKALKIEMLQGERNRERRMKEMISIRRDSVKGASFETRLMESLGDRIVEKLSEQFGSLEKLSHIILYEFERAYQDKQDEIQQRWEILQKQEEEMRNKEEMNKKREQELNDKEQQLKEYESELLSQFERFRLLPPLSIFERKDHIDLSNSKTIQWSKQEDIIDIIRGALHTQCNLQYERDVIECFVGALKTNQLIILHGPSGTGKSSLVRGFSKIIKGAKTYTIRVQSSWTDKQDILGFFNPIDYQYVSTEFLDALVEARENPKSLYLICLDEMNLSHVEYYFAEFLSAR…	B0I26_10419	gb|RAK20368.1|	MELWIAKIKATSEQPIQELVSPLIFNEESNCYIASEYEGTIVVKTSNHKVQKVFLSHYGVTSNEQRIPLIYDEQWNVWYDKGDEFEERSPIGINQCGTFFFEAEDGDGYIIDRSADVFITSSLLTEEEFQQMKDEIVSMLEDLFTANKGPATPMNLWKENVEVARYALDQMKKLHEMLLELEEAPHEQLIREHHLLPSSKIKRFNAEFLINRKLFPFKDKFLIPVNVRSIDIPEHRMIRWGLERLIDYADRYLRQARNRKRELYQRRDFLIHALSNQYDHRLRLFEQERIENSIKKDLDYVSESLQLVCKSERYWKEIGEIAKKCLSLHYLNVGEEELEQTHLFTFSPLYSEVYQYLDDLLNLKPLKQLSNTYVPLQKSPKLYEVWCLLSIIHSLIYEC…	Anoxybacillus vitaminiphilus	Bacillota
Gammaproteobacteria	Enterobacter hormaechei	QUZN01000037.1	DZ701_22500	gb|RFF31114.1|	MALEQVIYNLEEVKGFSDEELYQRLCESWGITNGKLAVWGKILNGPDSDSRKLPTRLLEIKSLQTGLDTEYPINVRLTMDKGVFVSFKSVEELFGLEDGSFVSCELALAPQSEREKHENPFECNVVVSSVRRLIKLPEYTANDIIKGDENIFLDEAVYKQHLQNVQSRIDSEVTALNAEFEREESSLKAQISSYKDQLQHVQDDLNQKNNVLSQAIAKAQKLEVEHSEWQHKIALQKKAEETMSKKIERLKAYVESKAGFLKSFEFLDDDDFDLFVGSTLSNKDRDEHISFSQAFDSNYSDAVSYIQAHLKERDILYPRHIIENFLTLIRTHDLIILAGDSGSGKTNLVQSFAKAIGGVSKIIPVKPNWTSSEDLLGYYNPLEKKYLVTPFLEALIEAK…	DZ701_22495	gb|RFF31113.1|	MEAPFVIKFIETKWHDKQTLVSVSESEYSLKLEQTGNNAFSAHTTIYPKVDELRFAQLAIKTKQGDQSPPYIVMPNGDRKQLESITDPASNAVWWVEPAHWDAKQRVWRSEARRTAGQITLVIGNSTLKLDIDISEQTKSDLSRYLSDFKADLWELILDENSHITGDAKNSQVAAIGQEALSLVASILSNAQTILKKPKVELKEIQALKPAKEVRPVPRTFMEICTKGSRKHLTSRASEPSYNVPENQYVLYVVSSTLSIVKQLVKVAESKKSRFSGAIEKLNERLDSLKDYRIINRDLVVKDLERLKKRFDTEVINAELSEQLAKINVNLSRSYSEKGYLRLEKATGSENEWWAKIKLSQNDDWQQFEPDGYTIFNSRDHYASLFKAYSDYEIEAKIP…	Enterobacter hormaechei	Gammaproteobacteria
Bacillota	Dorea formicigenerans	QSQM01000006.1	DXD18_08575	gb|RGK31155.1|	MRKGEKMKISEFFEYNNQQVLEENENILEYLEQIFGKSTEIDREGKKEFTFGKVIGLVTDSFLDEKTKRQKVSMLLCDADSKLLLWNGRPVEILRTNPENRLEEKKSYIQGLFFSGSELFTRNPQPCEEVSRANMVTSFVSDLDEKIRTAEETDENILSLKNKLEDQGYHCNIKVLAQFLLGLNTNQLIILHGAPGMGKTSFVSNIARALGFAYKIIPVRPNWIDNQDLTGYFNPVERRYYSTPFLDALCEAKENPQKHYLICLDEMNLAHVEYYFSDVLSSMESGEGIPLYAHKDQENAWKRQEAIMASHNENTVEWLDAKTDQENLKNRYTPEFEIPQNVTFVGTLNMDATTNDLSPKVIDRSCIIKVTKDAGETLCPFEQGVMTWEEMQGEDSFEK…	DXD18_08580	gb|RGK31156.1|	MQAVFLNNKTCERVHPVRIRKDNPDAEPFYEGMDEPLREIHDIWIMQYLRVDGAYFPRIAFEANEDENIEFDSNQEYEILSRKTDGYIYFIPENFNIYTVGDAQFFYRKNGKKQKIRIHVASMLDGETYEKILKELTAISIRFLYMTMNDGKNRRIKREYLTEYELEIHQLEHTIKEMSETLKALDREPVTDMISRPARQNFRQVKHLDANVIMDHYVLKKPKVRTRVHEKTFHIYENQKVYNFVKLLEKRLWALEQELEDKKMQMNRAAQGENRSRYNDVEENSGVAGTKKSIDELCSTITNLKGKLQAVYQLPMFKNEKYKEQKVYPLRTSNLFVNHKRYKKLFHQMRTYREMGELVEETVQYSSYHKSSEIYEIWCYFKILEIFILEKGYVIDRIS…	Dorea formicigenerans	Bacillota
[truncated: 67 more rows]

## Sheet: Type I-B CoCoNuT
Phylum/Class	Species	Genome accessions	PYD/CARD-CoCo-REC (CnuA) locus tags	PYD/CARD-CoCo-REC (CnuA) IDs	PYD/CARD-CoCo-REC (CnuA) sequences	CSD-YTH-McrB (CnuB) locus tags	CSD-YTH-McrB (CnuB) IDs	CSD-YTH-McrB (CnuB) sequences	IG-McrC_N-PD-DxK (CnuC) locus tags	IG-McrC_N-PD-DxK (CnuC) IDs	IG-McrC_N-PD-DxK (CnuC) sequences	Species	Phylum/Class
[truncated: 620 more rows]

## Sheet: Pseudo-Type I-B CoCoNuT
Phylum/Class	Species	Genome accessions	CSD-YTH-McrB (CnuB) locus tags	CSD-YTH-McrB (CnuB) IDs	CSD-YTH-McrB (CnuB) sequences	IG-McrC_N-PD-DxK (CnuC) locus tags	IG-McrC_N-PD-DxK (CnuC) IDs	IG-McrC_N-PD-DxK (CnuC) sequences	Species	Phylum/Class
[truncated: 1,416 more rows]

## Sheet: Type I-C CoCoNuT
Phylum/Class	Species	Genome accessions	CSD-YTH-CoCo-McrB (CnuB) locus tags	CSD-YTH-CoCo-McrB (CnuB) IDs	CSD-YTH-CoCo-McrB (CnuB) sequences	IG-McrC_N-PD-DxK (CnuC) locus tags	IG-McrC_N-PD-DxK (CnuC) IDs	IG-McrC_N-PD-DxK (CnuC) sequences	Species	Phylum/Class
[truncated: 667 more rows]

[truncated: 4 more sheets: Type II CoCoNuT, Type III-A CoCoNuT, Type III-B CoCoNuT, Type III-C CoCoNuT]
